# Supplementary material for: The p-block challenge: assessing quantum chemistry methods for inorganic heterocycle dimerizations
Source: Royal Society of Chemistry journal article supplement (doi:10.1039/d3cp06217a), 2024-01-01
Supplement: d3cp06217a1.xlsx [file d3cp06217a1.xlsx]

## Sheet: statistics_DFT_SQM_def2-QZVPP
All statistics and energies are given in kcal mol-1. The def2-QZVPP basis was applied in all DFT calculations.
The HF data were conducted with the aug-cc-pwcVTZ basis including the singles CABS correction.
	COVALENT						WDA
METHOD	MD	MAD	SD	RMSD	AMAX		MD	MAD	SD	RMSD	AMAX
HF-D4	0.508346	7.529	10.9851	10.9787	41.2061		-5.87496	5.87496	2.26948	6.29672	11.2292
PM6-D3H4X	-2.83659	115.199	159.537	159.271	681.476		7.96104	16.0059	32.2488	33.1597	175.418
PM7	-15.0114	110.011	163.506	163.896	911.572		-6.61794	13.0685	16.6665	17.9041	75.0862
GFN0-xTB	37.9338	42.2778	35.6189	51.995	164.348		1.45365	4.73461	6.74692	6.89082	47.2659
GFN1-xTB	-9.68853	32.5009	39.4502	40.5552	102.066		-5.01094	6.16855	5.74957	7.61921	23.3727
GFN2-xTB	15.2222	27.9261	33.5479	36.7891	116.218		-5.26496	5.54739	4.12507	6.68428	27.1759
B97M-V-C	11.6064	11.7837	5.17675	12.705	21.0442		3.5564	3.57287	2.11019	4.13354	11.0341
B97-3c	-0.425567	7.91743	9.30169	9.29602	21.975		-6.46304	6.46304	1.9875	6.76076	11.8311
r2SCAN-3c	2.47516	4.77779	5.09783	5.65935	12.058		0.722428	1.22152	1.3643	1.54177	4.06156
PBEh-3c	-8.34802	8.85322	5.58024	10.0362	24.2678		-0.351081	1.34348	1.72874	1.76123	7.32743
wB97X-3c	-4.94192	6.2856	6.31503	8.01063	23.1475		0.240309	0.816583	1.02814	1.0542	3.55156
PBE	15.1461	15.1461	6.07918	16.3168	33.2278		8.04687	8.04687	2.08565	8.31189	15.1716
PBE-D3BJ	2.12448	6.24145	6.99565	7.30003	22.7509		-0.624898	0.812473	0.75167	0.976542	2.60574
PBE-D4	-0.446826	6.45847	7.43678	7.43789	19.1978		-2.024	2.0279	0.90445	2.21628	4.56125
BP86	22.5938	22.5938	5.67541	23.2935	38.7978		10.6174	10.6174	2.42257	10.8894	18.5216
BP86-D3BJ	-7.8894	9.70544	8.4547	11.5537	22.2394		-9.88583	9.88583	2.95891	10.3177	17.0003
BP86-D4	-2.62431	7.46189	8.23028	8.62555	17.9257		-7.42863	7.42863	1.96601	7.68355	12.6041
B97M-V	8.0292	8.09507	3.53283	8.7697	16.4242		1.50389	1.64305	1.62139	2.2095	8.18411
TPSS	14.2575	14.2575	4.22327	14.8679	22.7378		9.26869	9.26869	2.13881	9.51146	16.8116
TPSS-D3BJ	-4.53716	5.53742	5.31262	6.97971	13.0446		-3.69453	3.69453	1.3499	3.93265	7.41004
TPSS-D4	-6.60093	6.98308	6.08214	8.96896	17.9329		-4.41277	4.41277	1.47137	4.65084	8.49408
r2SCAN	7.21808	7.28224	3.62079	8.07263	13.9442		4.43802	4.44171	1.65592	4.73593	8.56156
r2SCAN-D3BJ	2.39849	3.70129	3.57727	4.30201	8.69055		0.301662	0.798275	0.980091	1.02391	3.31154
r2SCAN-D4	2.99566	4.12344	3.74859	4.79368	9.84419		0.790574	1.14555	1.21927	1.45145	4.44156
M06-L	11.4903	11.5248	5.93597	12.9285	24.3742		0.900077	1.4563	1.61383	1.84552	6.94411
M06-L-D3(0)	11.1802	11.226	5.94711	12.6589	24.0907		0.589902	1.35586	1.61259	1.71459	6.4823
M06-L-D4	10.0685	10.1723	5.9327	11.6814	23.0593		-0.504485	1.26238	1.51251	1.59205	5.49106
MN15-L	12.1104	12.381	7.82881	14.4135	35.6242		-2.4983	2.72552	1.95567	3.17073	6.76743
MN15-L-D3(0)	12.1099	12.3806	7.82877	14.4131	35.6239		-2.49884	2.72586	1.95555	3.17107	6.76805
PBE0	5.88112	6.00559	4.52997	7.41891	17.7911		7.00286	7.00286	1.7081	7.2075	13.4916
PBE0-D3BJ	-8.0127	8.34154	4.39681	9.13626	16.2944		-2.74703	2.74703	0.978429	2.91553	5.34843
PBE0-D4	-8.51388	8.78627	4.6026	9.6747	16.6272		-2.97684	2.97684	1.04684	3.15497	5.66934
PBE0-NL	-8.31527	8.38274	3.83635	9.15492	15.9144		0.0334549	0.50926	0.638621	0.63844	2.0962
B3LYP	33.231	33.231	3.94139	33.4631	40.3819		12.4467	12.4467	3.26429	12.8662	23.0916
B3LYP-D3BJ	6.47862	6.76482	5.10892	8.24543	18.2374		-4.07837	4.07837	1.16961	4.24223	7.27844
B3LYP-D4	7.6799	8.25971	5.7202	9.57043	19.345		-3.70588	3.70588	1.23717	3.90629	6.78529
TPSSh	10.8924	10.8924	3.46849	11.4296	18.3211		8.79223	8.79223	2.00564	9.01735	16.1316
TPSSh-D3BJ	-7.8019	7.91819	3.96303	8.74776	14.751		-4.50374	4.50374	1.53569	4.75755	8.29928
TPSSh-D4	-8.39199	8.46675	4.62037	9.57615	17.4136		-4.32168	4.32168	1.44417	4.55583	8.02463
r2SCAN0	2.38582	4.08018	4.42131	5.01751	13.6919		4.29322	4.29322	1.41909	4.52094	8.78156
r2SCAN0-D3BJ	-4.00736	4.57555	3.85451	5.55581	16.1663		-1.11301	1.17133	0.68037	1.3039	2.70731
r2SCAN0-D4	-3.08212	4.12394	4.10935	5.13131	16.2144		-0.356545	0.790669	0.903034	0.969481	3.14156
r2SCAN0-NL	-4.6258	5.00406	4.10338	6.17899	18.5944		0.522462	0.826405	0.896344	1.03621	2.8636
M06	6.52043	6.6389	4.1258	7.71245	16.4464		0.462594	0.928368	1.11995	1.21001	5.39674
M06-D3(0)	5.21337	5.63578	4.34016	6.77892	15.2506		-1.22683	1.36997	1.0876	1.63831	4.22732
M06-D4	3.85021	4.69721	4.27807	5.75025	14.116		-1.92632	1.96265	0.988455	2.16438	4.53529
M06-2X	3.17629	5.46328	6.10076	6.86912	28.0453		-1.21618	1.36701	1.12101	1.65276	4.84912
M06-2X-D3(0)	2.91675	5.32541	6.07321	6.72824	27.8275		-1.63657	1.69789	1.11335	1.97833	5.23329
MN15	10.2316	11.1518	7.84267	12.8837	24.9342		-1.90535	1.92277	1.14352	2.22119	5.26557
MN15-D3BJ	10.2058	11.1317	7.8415	12.8625	24.9142		-1.93343	1.94939	1.14194	2.24451	5.29281
PW6B95	8.84745	8.85637	4.30004	9.83394	18.0077		5.86415	5.86415	1.7324	6.11388	12.9016
PW6B95-D3BJ	-4.70854	4.91389	3.36243	5.78263	11.9172		-3.20315	3.20315	1.02132	3.36152	6.40161
PW6B95-D4	4.65029	6.39528	6.51205	7.99323	22.2877		3.10359	3.14926	1.87471	3.62425	12.1716
wB97X-V	-4.52275	6.91689	7.49146	8.74022	17.4643		-0.87138	0.940262	0.719218	1.1291	3.66912
wB97M-V	-2.37103	3.71431	4.23435	4.84687	13.1644		-1.90115	1.90115	0.906741	2.10566	5.50912
RevDSD-PBEP86(2021)	4.27814	4.29868	2.27531	4.8438	9.78528		2.35403	2.35403	0.619646	2.43396	4.53236
revDSD-PBEP86-D3BJ	-7.49276	7.49276	2.83131	8.0082	13.0428		-1.28571	1.66679	3.48286	3.70717	57.3516
revDSD-PBEP86-D4(2021)	-1.54494	2.30036	2.38897	2.84167	6.5672		-0.679184	0.70653	0.503881	0.845188	1.99477
PWPB95	2.56473	2.97483	2.82346	3.81095	9.13031		3.34534	3.34534	0.83189	3.44689	6.85156
PWPB95-D3BJ	-12.6572	12.6572	3.37052	13.0969	21.1947		-4.43843	4.43843	1.70591	4.75396	10.9753
PWPB95-D4	-0.902355	3.09031	3.44973	3.56026	9.24444		1.40084	1.43235	0.887181	1.65736	5.50156
wB97M(2)	-8.52438	8.53373	4.53252	9.65094	16.3601		-2.63565	2.63565	1.48098	3.02204	7.00844
Pr2SCAN50-D4	-4.40815	4.42942	2.44594	5.03931	11.8444		-0.972969	0.979265	0.459523	1.0757	2.24529
Pr2SCAN50-NL	-6.23176	6.23176	2.38994	6.67291	14.0544		-0.82926	0.837355	0.578783	1.01072	2.16772
kPr2SCAN50-D4	-6.35169	6.40752	3.47625	7.23798	15.2244		-0.857108	0.894154	0.559618	1.02312	2.22529
wPr2SCAN50-D4	-6.23156	6.33139	3.37611	7.08468	13.3774		-1.49155	1.49155	0.579876	1.59995	3.44638
wPr2SCAN50-NL	-6.02259	6.08463	3.45625	6.94102	13.8274		-0.129625	0.41842	0.517218	0.532383	1.81917
SOS0-PBE0-2	-5.20852	5.74789	5.55015	7.60466	51.0858		1.68008	1.69399	0.620589	1.79068	2.70891
SOS0-PBE0-2-D3BJ	-9.73654	10.0492	5.47248	11.1646	46.8195		-1.50043	1.50043	0.807595	1.70333	4.29287
WB97X-2	-6.10737	6.23975	3.52237	7.04741	14.0551		-1.83116	1.83116	0.925273	2.05096	4.80353
B2NC-PLYP	-1.51355	2.9727	3.09943	3.44464	8.64727		0.238047	0.70224	0.813522	0.846341	2.46514
B2NC-PLYP-D3BJ	-3.28875	3.89179	3.11642	4.52722	10.6151		-1.35213	1.38873	0.957095	1.65567	4.32357

## Sheet: covalent_dE_DFT_SQM_def2-QZVPP
Dimerization energies in kcal mol-1 for the covalent IHD302 set. All computations were done with the def2-QZVPP basis set. Statistics can be found at the bottom of the table.
SYSTEM	REF	HF-D4	PM6-D3H4X	PM7	GFN0-xTB	GFN1-xTB	GFN2-xTB	B97M-V-C	B97-3c	r2SCAN-3c	PBEh-3c	wB97X-3c	PBE	PBE-D3BJ	PBE-D4	BP86	BP86-D3BJ	BP86-D4	B97M-V	TPSS	TPSS-D3BJ	TPSS-D4	r2SCAN	r2SCAN-D3BJ	r2SCAN-D4	M06-L	M06-L-D3(0)	M06-L-D4	MN15-L	MN15-L-D3(0)	PBE0	PBE0-D3BJ	PBE0-D4	PBE0-NL	B3LYP	B3LYP-D3BJ	B3LYP-D4	TPSSh	TPSSh-D3BJ	TPSSh-D4	r2SCAN0	r2SCAN0-D3BJ	r2SCAN0-D4	r2SCAN0-NL	M06	M06-D3(0)	M06-D4	M06-2X	M06-2X-D3(0)
al3as3	-123.053	-121.288	135.2	-118.94	-70.34	-127.43	-89.9	-106.96	-131.82	-124.16	-134.73	-130.9	-112.74	-127.098	-128.8	-104.49	-137.245	-130.44	-109.13	-112.61	-133.202	-134.09	-115.55	-121.056	-120.14	-111.05	-111.481	-112.685	-109.31	-109.311	-118.31	-133.525	-133.17	-130.07	-91.85	-120.816	-118.04	-114.65	-135.122	-134.57	-118.7	-125.876	-124.57	-124.48	-113.04	-114.734	-116.001	-113.88	-114.244
al3bi3	-130.974	-125.532	-175.32	-16.26	-155.53	-149.1	-150.55	-126.79	-149.9	-138.57	-143.74	-143.29	-122.93	-137.123	-138.89	-114.76	-150.558	-141.25	-127.18	-122.83	-143.713	-143.96	-123	-128.57	-127.38	-122.3	-122.762	-123.805	-115.8	-115.802	-126.83	-142.575	-141.76	-139.22	-102.69	-133.142	-128.93	-124.24	-145.29	-143.74	-124.8	-132.395	-130.61	-131.2	-126.3	-128.075	-129.044	-123.28	-123.665
al3n3	-134.912	-147.213	-26.93	143.04	-72.29	-87.61	-117.03	-124.48	-141.98	-141.62	-159.18	-136.84	-120.54	-131.789	-133.55	-115.14	-137.881	-134.55	-129.12	-126.35	-141.717	-143.71	-134.88	-138.73	-138.47	-132.32	-132.707	-133.63	-136.38	-136.38	-131.15	-142.291	-142.79	-141.87	-109.01	-130.478	-129.86	-129.71	-144.587	-145.74	-139.44	-144.211	-143.81	-144.4	-126.67	-128.04	-129.056	-137.42	-137.748
al3o3	-131.858	-146.269	-78.35	43.18	32.49	-86.77	-104.45	-134.03	-131.29	-138.49	-151.51	-126.09	-114.58	-123.303	-125.16	-110.87	-129.247	-126.55	-126.07	-122.63	-134.655	-136.77	-132.27	-135.042	-134.93	-131.9	-132.09	-132.816	-135.73	-135.73	-126.22	-134.903	-135.58	-136.21	-109.01	-126.353	-126.19	-126.16	-137.775	-139.1	-137.21	-140.733	-140.51	-141.81	-120.75	-121.505	-122.485	-139.81	-139.975
al3p3	-121.433	-121.496	-209.02	-156.13	-81.18	-105.57	-105.67	-102.67	-127.47	-127.73	-137.11	-128.65	-113.81	-128.043	-129.52	-105.27	-136.213	-130.27	-108.1	-113.8	-133.92	-134.84	-118.18	-123.62	-122.81	-115.33	-115.747	-117.029	-112.87	-112.871	-119.79	-134.568	-134.27	-131.04	-92.45	-120.298	-117.87	-116.03	-135.911	-135.59	-121.25	-128.185	-127.06	-126.62	-112.19	-113.796	-115.228	-116.95	-117.305
al3po3	-92.0122	-79.5205			-103.15	-95.08	-55.41	-74.19	-99.3	-90.24	-91.39	-91.51	-80.9	-96.4966	-98.99	-70.93	-110.44	-100.77	-79.41	-81.13	-104.126	-105.22	-86.18	-91.8732	-90.74	-79.4	-79.7201	-80.8282	-75.33	-75.3303	-85.16	-102.343	-101.94	-99.4	-53.97	-87.8206	-84	-82.6	-105.658	-104.73	-87.95	-95.8182	-94.08	-95.04	-79.74	-81.2957	-82.5201	-87.13	-87.3892
al3s3	-108.679	-109.686	-62.46	-202.5	-62.2	-77.37	-76.43	-97.17	-112.1	-112.78	-118.2	-108.59	-98.78	-112.376	-113.9	-91	-120.732	-114.9	-100.48	-101.54	-120.793	-121.87	-107.85	-112.706	-111.98	-108.72	-108.976	-110.13	-108.54	-108.54	-105.18	-119.202	-118.99	-116.9	-79.07	-106.024	-103.73	-103.6	-122.532	-122.41	-110.14	-116.394	-115.36	-115.66	-103.07	-104.308	-105.719	-107.71	-107.927
al3se3	-103.853	-100.325	-42.22	-116.86	-58.15	-60.94	-43.47	-88.96	-109.17	-104.69	-107.93	-104.5	-93.14	-107.543	-109.29	-84.49	-117.598	-110.49	-93.87	-94.85	-115.566	-116.55	-100.9	-106.069	-105.17	-99.51	-99.783	-100.917	-98.24	-98.2403	-99.2	-114.381	-114.03	-111.84	-70.73	-100.183	-97.3	-96.87	-117.373	-116.9	-103.32	-110.138	-108.85	-109.41	-98.31	-99.6762	-100.999	-100.51	-100.738
al3te3	-94.8823	-85.9078	77.67	-102.1	-79.11	-93.2	-82.33	-78.9	-103.09	-96.1	-96.84	-98.88	-85.08	-100.728	-102.85	-75.31	-113.263	-104.53	-84.11	-85.05	-107.927	-108.88	-90.84	-96.5995	-95.51	-86.87	-87.1608	-88.3811	-83.24	-83.2403	-89.77	-106.708	-106.25	-103.55	-59.11	-92.0572	-88.51	-86.72	-109.559	-108.7	-92.74	-100.521	-98.9	-99.53	-88.48	-89.9283	-91.3739	-89.23	-89.4681
alasalasalsb	-121.38	-119.425	46.28	-63.54	-91.2	-141.17	-94.94	-107.1	-132.7	-124.43	-133.54	-129.29	-112.08	-126.581	-128.32	-103.73	-137.424	-130.15	-109.19	-111.69	-132.599	-133.38	-114.11	-119.717	-118.74	-109.63	-110.061	-111.27	-107.69	-107.691	-117.32	-132.821	-132.38	-129.31	-90.99	-120.56	-117.51	-113.64	-134.487	-133.75	-117.14	-124.508	-123.1	-123.09	-112.37	-114.06	-115.34	-112.3	-112.663
alasgaasalp	-115.191	-115.409	-174.28	-31.51	-59.56	-113.55	-100.3	-98.21	-123.81	-118.21	-128.13	-121.74	-105.65	-119.95	-122.63	-98.01	-130.324	-125.39	-101.93	-105.36	-125.812	-128.08	-109.17	-114.644	-114.02	-103.44	-103.875	-105.167	-102.96	-102.961	-111.19	-126.285	-126.89	-123.3	-85.51	-114.168	-113.18	-107.4	-127.711	-128.47	-112.06	-119.166	-118.25	-118	-107.48	-109.189	-110.613	-107.57	-107.939
alasgaasalsb	-118.681	-118.004	4.22	208.31	-85.39	-137.11	-103.58	-104.92	-130.98	-122.07	-130.56	-126.81	-109.55	-124.047	-126.78	-102.03	-135.91	-130.12	-107.54	-109.1	-130.041	-132.1	-111.72	-117.323	-116.59	-106.32	-106.762	-108.028	-105.9	-105.901	-114.35	-129.889	-130.34	-126.8	-89.88	-119.532	-118.05	-110.83	-131.727	-132.14	-114.3	-121.685	-120.59	-120.54	-112.92	-114.66	-116.031	-109.74	-110.111
albialbialas	-124.025	-119.645	-118.5	-19.62	-118.41	-130.86	-122.93	-114.51	-138.88	-128.88	-135.99	-134.07	-115	-129.339	-131.11	-106.8	-141.754	-133.32	-115.82	-114.98	-135.912	-136.4	-116.07	-121.653	-120.55	-113.29	-113.733	-114.847	-108.53	-108.531	-119.53	-135.19	-134.54	-131.83	-94.3	-124.418	-120.72	-116.62	-137.623	-136.43	-118.41	-125.912	-124.28	-124.65	-116.19	-117.937	-119.025	-116.01	-116.381
aloalsalse	-113.597	-117.214	-49	-82.59	-29.66	-77.36	-74.92	-106.81	-118.02	-118.46	-125.28	-112.6	-101	-113.311	-115.19	-94.42	-121.515	-116.55	-106.45	-105.52	-122.92	-124.56	-112.39	-116.644	-116.11	-114.45	-114.696	-115.706	-114.27	-114.27	-108.45	-121.116	-121.3	-120	-85.07	-109.736	-108.24	-107.76	-124.825	-125.31	-115.09	-120.597	-119.81	-120.54	-106.76	-107.83	-109.144	-114.25	-114.461
alogaoals	-126.288	-138.769	-151	-89.94	-5.9	-93.81	-109.96	-126.2	-129.88	-133.16	-142.26	-124.54	-111.86	-121.928	-124.9	-107.58	-129.329	-127.46	-122.67	-118.24	-132.306	-135.66	-127.89	-131.265	-131.23	-128.58	-128.802	-129.715	-129.62	-129.62	-121.82	-132.045	-133.51	-133.07	-103.3	-123.367	-124.52	-121.28	-134.997	-137.27	-131.92	-136.251	-136.12	-137.22	-122.33	-123.284	-124.485	-134.6	-134.791
alogaoino	-124.753	-140.579	-166.34	-39.06	10.36	-91.65	-120.46	-129.34	-122.75	-129.3	-140.46	-125.73	-103.77	-112.3	-115.42	-100.84	-119.704	-118.44	-121.49	-112.33	-124.241	-127.81	-124.72	-127.514	-127.65	-124.48	-124.693	-125.475	-126.06	-126.06	-116.28	-124.992	-126.69	-128.26	-100.11	-117.468	-119.04	-116.17	-127.784	-130.34	-129.81	-133.436	-133.5	-135.54	-117.11	-118.031	-119	-135.77	-135.95
alpalpalas	-121.438	-120.99	-82.08	-165.06	-73.82	-114.56	-101.82	-103.26	-128.36	-125.99	-135.87	-128.76	-112.86	-127.174	-128.73	-104.43	-136.057	-129.82	-107.74	-112.89	-133.227	-134.14	-116.81	-122.282	-121.44	-113.23	-113.65	-114.91	-111.11	-111.111	-118.74	-133.702	-133.39	-130.18	-91.67	-119.966	-117.42	-115.07	-135.205	-134.81	-119.92	-126.949	-125.76	-125.43	-111.86	-113.492	-114.877	-115.41	-115.767
alpgapalas	-115.125	-116.524	-42.85	-141.2	-69.84	-111.98	-106.58	-97.48	-124.11	-120.18	-129.74	-123.14	-106.68	-120.942	-123.54	-99	-130.718	-126.07	-102.22	-106.78	-127.083	-129.35	-110.49	-115.944	-115.36	-105.57	-106	-107.319	-105.18	-105.181	-112.37	-127.324	-127.95	-124.38	-86.85	-115.135	-114.25	-108.84	-128.963	-129.79	-113.48	-120.508	-119.65	-119.33	-107.55	-109.229	-110.71	-109.57	-109.936
alpogapoalte	-82.6431	-72.4771			-87.84	-92.31	-64.74	-66.24	-92.14	-83.26	-84.12	-82.84	-72.19	-87.7914	-91.24	-63.1	-102.289	-94.53	-71.07	-72.12	-95.1048	-97.53	-78.04	-83.7467	-82.87	-69.98	-70.3	-71.497	-68.54	-68.5403	-76.41	-93.548	-94.08	-91.18	-46.55	-80.1745	-78.15	-73.56	-96.5937	-96.93	-79.48	-87.3328	-85.96	-86.85	-73.71	-75.283	-76.6631	-78.96	-79.2193
alpogapoinpo	-77.0583	-65.868			-83.8	-111.75	-54.03	-60.81	-87.54	-76.5	-76.8	-78.07	-63.63	-79.1258	-82.66	-55.94	-96.0589	-87.58	-65.22	-63.74	-86.7437	-89.03	-70.24	-75.9535	-75.01	-61.61	-61.9725	-63.0851	-60.97	-60.9704	-67.45	-84.7267	-85.17	-83.32	-40.59	-74.5826	-72.2	-64.96	-88.1204	-88.2	-70.87	-78.8517	-77.35	-78.92	-68.9	-70.6083	-71.7871	-73.45	-73.7396
alsalsalpo	-102.579	-99.3049			-68.81	-87.53	-68.97	-89.09	-107.1	-105.04	-108.43	-102.66	-92.34	-106.711	-108.59	-83.83	-116.88	-110.03	-93.13	-94.45	-115.13	-116.28	-100.24	-105.43	-104.58	-98.94	-99.2147	-100.376	-97.28	-97.2803	-98.02	-113.19	-112.97	-110.59	-70.21	-99.5247	-96.9	-96.28	-116.766	-116.46	-102.34	-109.189	-107.95	-108.37	-94.87	-96.209	-97.6047	-100.83	-101.06
alsalsalse	-106.968	-106.606	-48.02	-160.1	-58.75	-72.49	-66.54	-94.43	-111.11	-110.4	-114.75	-107.2	-96.83	-110.674	-112.28	-88.81	-119.589	-113.4	-98.24	-99.29	-119.001	-120.06	-105.44	-110.399	-109.62	-105.69	-105.952	-107.101	-105.16	-105.16	-103.09	-117.474	-117.23	-115.1	-76.34	-104.057	-101.61	-101.31	-120.737	-120.52	-107.75	-114.187	-113.08	-113.45	-101.36	-102.644	-104.025	-105.24	-105.461
alsalsalte	-103.64	-101.256	-23.88	-179.2	-70.23	-84.14	-83.32	-90.81	-108.57	-107.05	-110.42	-104.95	-93.85	-108.176	-109.91	-85.41	-117.856	-111.2	-94.85	-95.83	-116.36	-117.42	-101.88	-107.065	-106.22	-101.8	-102.066	-103.255	-100.03	-100.03	-99.62	-114.647	-114.38	-112.04	-72.03	-100.971	-98.35	-97.72	-118.022	-117.7	-103.98	-110.767	-109.55	-109.91	-97.97	-99.2704	-100.723	-101.3	-101.524
alsbalsbalbi	-124.936	-121.954	-192.91	50.81	-149.86	-172.53	-118.47	-117.13	-142.2	-131.87	-137.95	-134.62	-117.29	-131.846	-133.64	-108.81	-144.473	-135.8	-118.44	-116.59	-137.867	-138.33	-117.77	-123.476	-122.34	-114.75	-115.197	-116.346	-110.96	-110.961	-121.87	-137.809	-137.13	-134.27	-96.3	-126.97	-123.15	-118.32	-139.687	-138.42	-120.36	-128.033	-126.36	-126.68	-119.06	-120.781	-121.952	-116.34	-116.713
alsbgasbalas	-112.926	-111.965	-174.34	-454.07	-96.68	-144.39	-97.12	-100.63	-126.64	-117.48	-125.09	-119.73	-104.77	-119.437	-122.21	-96.79	-131.732	-125.37	-103.58	-103.85	-125.141	-127.11	-106.47	-112.173	-111.37	-101.14	-101.582	-102.851	-99.39	-99.3914	-109.72	-125.578	-125.94	-122.53	-83.92	-114.293	-112.5	-105.71	-127.013	-127.24	-109.22	-116.799	-115.59	-115.67	-107.84	-109.574	-110.956	-103.8	-104.171
alsealsealpo	-99.5359	-93.1306			-72.27	-73.92	-44.65	-83.89	-105.51	-99.68	-102.08	-99.94	-88.87	-103.7	-105.7	-79.78	-115.013	-107.16	-88.77	-90.15	-111.683	-112.72	-95.78	-101.146	-100.17	-92.55	-92.8372	-93.9713	-90.47	-90.4703	-94.27	-110.144	-109.79	-107.43	-64.92	-95.8282	-92.7	-91.96	-113.374	-112.77	-97.96	-105.151	-103.72	-104.36	-91.78	-93.212	-94.5147	-96.14	-96.378
alsealseals	-105.417	-103.543	-40.09	-130.02	-57.99	-67.22	-55.52	-91.68	-110.13	-107.73	-111.3	-105.9	-94.92	-109.074	-110.76	-86.58	-118.584	-111.94	-96.09	-97.03	-117.289	-118.32	-103.17	-108.242	-107.4	-102.66	-102.927	-104.071	-101.71	-101.71	-101.14	-115.952	-115.66	-113.48	-73.49	-102.134	-99.48	-99.07	-119.078	-118.74	-105.58	-112.217	-111.02	-111.47	-99.87	-101.191	-102.552	-102.89	-103.115
alsealsealte	-100.603	-95.2432	-2.57	-94.98	-63.66	-72.03	-57.5	-85.52	-106.93	-101.7	-104.02	-102.31	-90.27	-105.093	-106.96	-81.26	-115.958	-108.34	-90.47	-91.47	-112.915	-113.88	-97.38	-102.753	-101.79	-95.29	-95.5683	-96.7337	-93.15	-93.1503	-95.85	-111.619	-111.24	-108.87	-66.69	-97.2889	-94.2	-93.35	-114.641	-114.04	-99.61	-106.754	-105.36	-105.93	-94.84	-96.2329	-97.6018	-96.68	-96.9115
alsegaseals	-93.0134	-91.7868	-135.11	-238.9	-58.77	-60.48	-56.02	-80.96	-100.23	-95.91	-99.85	-92.13	-82.52	-96.5701	-99.36	-74.73	-106.73	-101.78	-84.54	-84.47	-104.624	-107.1	-91.34	-96.3803	-95.81	-88.38	-88.6572	-89.8551	-89.51	-89.5103	-88.63	-103.386	-104.09	-101.66	-61.49	-90.0234	-89.16	-86.48	-106.408	-107.38	-93.43	-100.048	-99.19	-99.7	-88.77	-90.1523	-91.5879	-91.71	-91.9422
alsegasealte	-93.516	-89.2176	-180.04	-381.4	-60.4	-68.61	-62.13	-80.05	-101.2	-95.56	-97.63	-94.94	-82.98	-97.7138	-100.7	-74.87	-109.578	-103.66	-84.48	-84.23	-105.585	-107.99	-90.84	-96.1822	-95.48	-86.96	-87.2488	-88.4656	-87.4	-87.4003	-88.45	-104.172	-104.79	-102.13	-60.83	-91.3428	-90.05	-86.03	-107.253	-107.96	-92.7	-99.8257	-98.77	-99.4	-90.15	-91.6007	-93.0447	-90.85	-91.0893
alsegaseinse	-87.4306	-85.3659	-76.11	-17.9	-42.84	-76.28	-49.75	-75.68	-94.63	-89.62	-91.62	-89.49	-73.81	-87.9642	-90.88	-67.13	-100.621	-94.89	-79	-75.62	-96.1448	-98.48	-83.64	-88.7963	-88.13	-78.9	-79.2129	-80.3637	-80.26	-80.2604	-79.89	-95.0344	-95.64	-94.22	-55.03	-84.4035	-83.14	-77.59	-98.0092	-98.69	-85.35	-92.239	-91.23	-92.41	-84.45	-86.0196	-87.2552	-86.04	-86.2955
alsgasalo	-92.371	-96.9384	-139.65	-76.54	-34.98	-62.07	-75.77	-90.21	-96.43	-97.56	-105.28	-89.81	-80.63	-92.5193	-95.38	-74.44	-100.377	-97.4	-87.14	-85.56	-102.308	-105.34	-92.72	-96.8236	-96.6	-93.14	-93.3865	-94.4536	-95.5	-95.5002	-87.74	-99.9261	-101.1	-99.7	-64.73	-88.4167	-88.78	-87.64	-104.046	-105.87	-94.79	-100.077	-99.7	-100.44	-85.54	-86.6423	-88.0303	-95.34	-95.551
alsgasalse	-98.9146	-99.5547	-60.76	59.28	-54.77	-73.45	-73.22	-88.65	-105.19	-104.42	-106.79	-99.22	-88.58	-102.338	-105.05	-81.24	-112.05	-107.53	-91.51	-91.1	-110.729	-113.22	-97.98	-102.91	-102.39	-96.66	-96.9313	-98.135	-97.77	-97.7703	-94.89	-109.233	-109.98	-107.64	-69.11	-96.7595	-96.08	-93.11	-112.477	-113.56	-100.1	-106.521	-105.75	-106.21	-95.56	-96.9005	-98.3608	-98.73	-98.9581
alsgasins	-92.7345	-94.7291	-128.1	-156.58	-59.41	-95.42	-87.31	-85.43	-97.9	-95.53	-102.46	-94.26	-78.78	-92.1758	-94.96	-72.66	-102.941	-98.52	-85.66	-81.82	-100.955	-103.49	-90.25	-95.1058	-94.63	-88.61	-88.9006	-90.0889	-89.4	-89.4003	-85.59	-99.633	-100.44	-99.1	-62.35	-89.3851	-88.79	-83.98	-102.9	-104.02	-92.18	-98.524	-97.79	-98.71	-89.16	-90.6067	-91.947	-93.55	-93.7899
altealtealpo	-93.9856	-83.9414			-83.03	-96.56	-75.34	-77.37	-101.84	-94.16	-95.07	-96.46	-83.73	-99.3893	-101.65	-73.89	-112.434	-103.4	-82.61	-83.79	-106.754	-107.76	-89.36	-95.1055	-94	-84.42	-84.7195	-85.9049	-80.63	-80.6303	-88.3	-105.351	-104.92	-102.24	-57.43	-90.7376	-87.12	-85.4	-108.359	-107.49	-91.23	-99.0521	-97.39	-98.12	-85.6	-87.0832	-88.4602	-88.66	-88.9044
altealteals	-99.0888	-93.3013	23.51	-109.16	-75.88	-89.26	-84.1	-84.74	-105.55	-101.45	-103.32	-101.66	-89.29	-104.304	-106.24	-80.19	-115.396	-107.78	-89.34	-90.34	-112.086	-113.11	-96.19	-101.678	-100.71	-94.46	-94.737	-95.9488	-91.55	-91.5503	-94.48	-110.486	-110.14	-107.58	-65.37	-96.3229	-93.29	-92.1	-113.714	-113.14	-98.16	-105.46	-104.05	-104.51	-93.08	-94.4525	-95.9162	-95.12	-95.3501
altealtealse	-97.5783	-90.3582	37.31	-82.2	-70.56	-82.53	-69.99	-82.15	-104.87	-98.81	-100.3	-100.39	-87.57	-102.797	-104.79	-78.19	-114.475	-106.33	-87.17	-88.18	-110.328	-111.28	-93.98	-99.5473	-98.52	-91.05	-91.3347	-92.5283	-88.17	-88.1703	-92.67	-109.012	-108.59	-106.05	-62.79	-94.5297	-91.22	-89.94	-111.993	-111.27	-96.02	-103.482	-101.98	-102.56	-91.53	-92.9525	-94.3593	-92.84	-93.0749
altegatealpo	-85.4762	-76.1693			-65.99	-96.01	-73.44	-70.1	-95.15	-86.7	-87.42	-87.47	-75.18	-90.799	-94.1	-66.25	-104.908	-97.45	-74.95	-75.23	-98.1741	-100.52	-81.21	-86.9393	-86.08	-74.47	-74.7795	-76.0152	-73.91	-73.9103	-79.49	-96.5441	-97.04	-94.09	-50.18	-83.4957	-81.53	-76.7	-99.6592	-99.99	-82.57	-90.3934	-89.06	-89.84	-79.06	-80.5955	-82.0514	-80.89	-81.1417
altegatealse	-84.8634	-78.5511	77.41	173.4	-56.74	-82.07	-66.12	-70.76	-94.6	-88.46	-88.73	-86.8	-75.13	-90.3055	-93.37	-66.36	-102.751	-96.22	-75.29	-75.51	-97.628	-99.96	-81.91	-87.4587	-86.69	-76.47	-76.7644	-78.0116	-75.96	-75.9603	-80.13	-96.4681	-97	-94.23	-50.86	-82.593	-80.99	-77.23	-99.2747	-99.8	-83.64	-91.1007	-89.93	-90.57	-79.72	-81.1977	-82.6856	-81.38	-81.6221
altegateinte	-79.4241	-72.0237	-34.82	-160.88	-57.8	-116.27	-75.91	-65.27	-89.45	-80.82	-81.52	-84.64	-66.87	-82.3939	-85.64	-59.23	-97.7861	-90.34	-69.7	-66.76	-89.6169	-91.85	-74.23	-80.0065	-79.13	-67.43	-67.7594	-68.9964	-67.21	-67.2104	-71.39	-88.4071	-88.86	-86.81	-44.7	-77.7774	-75.78	-68.29	-91.2088	-91.44	-75.21	-83.1018	-81.74	-82.95	-76.2	-77.8082	-79.2143	-75.2	-75.465
b3as3	-52.8142	-50.5214	-169.92	-131.76	30.84	-81.29	-28.97	-43.06	-55.23	-47.29	-63.23	-73.29	-46.16	-59.5392	-62.43	-36.05	-64.132	-61.29	-46.2	-40.06	-58.7343	-61.91	-41.07	-45.8967	-45.63	-41.88	-42.3015	-43.5125	-39.53	-39.5306	-52.7	-66.2852	-67.49	-65.13	-19.82	-45.6299	-46.16	-43.01	-61.2865	-63.24	-47.17	-53.2438	-52.83	-53.14	-47.46	-48.8773	-50.4478	-44.89	-45.2534
b3bi3	-93.2425	-89.3423	-13.66	-80.88	-99.43	-173.36	-115.32	-91.01	-106.41	-95.61	-104.18	-116.39	-87.54	-101.091	-103.78	-79.66	-112.225	-105.75	-96.71	-86.49	-106.029	-108	-87.48	-92.5033	-91.85	-85.91	-86.3645	-87.4249	-81.83	-81.8312	-91.48	-106.084	-106.44	-105.05	-66.25	-94.7008	-92.82	-87.82	-107.286	-107.62	-88.44	-95.1525	-94.11	-95.32	-93.65	-95.209	-96.4325	-88.48	-88.8632
b3p3	-43.5539	-42.0161	-150.63	32.96	18.56	-84.02	-36.64	-23.77	-38.67	-35.32	-55.36	-63.25	-38.03	-51.3364	-53.64	-26.93	-52.9628	-50.63	-32.08	-30.31	-48.5213	-51.33	-33.02	-37.7744	-37.51	-37.4	-37.8205	-39.0518	-30.75	-30.7505	-45.56	-58.6763	-59.65	-57.11	-9.55	-34.1293	-34.61	-33.98	-51.6396	-53.49	-40.62	-46.4275	-46.08	-45.92	-34.56	-35.8737	-37.5542	-37	-37.366
b3po3	-25.4019	15.8043			3.08	-72.39	-18.87	-6.48	-28.6	-16.23	-17.47	-16.04	-17.18	-31.2698	-35.19	-7.41	-41.2367	-35.95	-10.56	-11.17	-31.4389	-35.1	-12.71	-17.6067	-17.22	-3.93	-4.24452	-5.38377	1.77	1.76979	-15.95	-30.9663	-32.33	-31.02	14.98	-15.0253	-14.73	-10.97	-31.0355	-32.87	-11.71	-18.3179	-17.62	-19.09	-11.88	-13.1684	-14.6913	-10.48	-10.7489
b3s3	6.03908	34.058	-79.22	-71.68	100.27	-22.72	1.86	18.96	7.33	9.94	9.11	-1.97	6.8	-5.04719	-7.48	17.17	-5.71224	-4.22	19.05	13.26	-2.88532	-6.08	11.02	7.05806	7.17	9.63	9.34082	8.29056	13.31	13.3099	6.18	-5.29766	-6.54	-6.03	40.42	18.3758	17.27	12.53	-2.98833	-5.31	9.72	4.87448	5.03	4.23	11.75	10.8605	9.225	8.23	7.9807
b3sb3	-81.1828	-82.3372	-326.02	-224.61	-81.83	-164.52	-52.05	-75.59	-88.24	-78.2	-93.58	-96.81	-75.11	-89.559	-92.05	-65.15	-98.0277	-92.07	-82.53	-71.26	-91.8428	-93.85	-72.75	-78.0654	-77.41	-72.02	-72.4462	-73.657	-69.64	-69.641	-82.28	-97.4772	-97.81	-95.88	-50.47	-79.8006	-78.1	-74.19	-94.5525	-95.05	-77.95	-84.8819	-83.89	-84.7	-80.34	-81.8242	-83.343	-78.38	-78.7403
b3se3	-3.51599	26.3116	58.57	-32.02	74.62	-20.22	27.53	11.59	-3.55	1.66	1.47	-9.32	-0.76	-13.4052	-16.69	9.44	-16.9523	-15.01	11.07	6.22	-11.3939	-15.27	4.37	0.08455	0.2	7.5	7.20313	6.09559	10.73	10.7299	-0.99	-13.6562	-15.29	-14.16	32.32	7.65481	6.28	5.66	-11.4522	-14.12	3.18	-2.24237	-2.04	-2.98	4.36	3.33957	1.67472	1.67	1.41249
b3te3	-18.5716	16.5526	31.16	-52.46	43.23	-82.15	-17.2	-1.36	-21.28	-11	-14.9	-16.77	-13.2	-27.6291	-30.59	-2.64	-35.3601	-30.01	-4.84	-5.8	-26.3251	-29.11	-7.82	-12.8316	-12.32	-2.4	-2.69716	-3.88767	2.17	2.16983	-13.19	-28.1956	-28.98	-27.73	20.05	-9.55552	-8.56	-6.24	-26.4194	-27.65	-8.56	-15.14	-14.35	-15.59	-9.96	-11.1298	-12.8099	-7.56	-7.81685
basalasbp	-70.2838	-65.3826	76.62	-123.62	-7.65	-124.89	-73.64	-55	-72.1	-66.64	-79.25	-85.61	-61.48	-75.5069	-78.04	-51.68	-81.2462	-77.52	-57.84	-56.55	-76.187	-78.81	-58.83	-63.9513	-63.51	-58.15	-58.5613	-59.8274	-55.48	-55.4807	-67.51	-81.7994	-82.6	-79.83	-35.81	-62.8984	-62.65	-59.24	-78.4933	-79.86	-64.03	-70.4942	-69.86	-69.9	-60.62	-62.0245	-63.6843	-61.62	-61.9784
basalasgaas	-94.1043	-91.2755	-59.6	-83	-18.13	-107.05	-77.75	-80.26	-101.27	-93.09	-103.09	-105.38	-84.57	-98.8717	-102.08	-76.3	-108.135	-104.29	-82.12	-81.72	-102.082	-105.2	-84.36	-89.712	-89.27	-80.23	-80.6498	-81.9568	-79.25	-79.251	-89.78	-104.737	-105.89	-102.58	-62.32	-90.7871	-90.87	-83.82	-103.967	-105.57	-88	-94.9185	-94.25	-94.28	-87.21	-88.7945	-90.3783	-84.62	-84.9833
basbasbbi	-67.2921	-63.6028	-149.97	-89.48	-8.77	-109.84	-58.91	-61	-73.74	-65.08	-77.41	-87.69	-61.34	-74.9289	-77.79	-52.06	-81.8886	-77.95	-64.76	-56.8	-76.0011	-78.83	-58.24	-63.1799	-62.78	-57.57	-57.998	-59.1764	-55.92	-55.9208	-66.47	-80.5388	-81.5	-79.3	-36.66	-63.5797	-63.41	-59	-77.9044	-79.37	-62.04	-68.3859	-67.77	-68.31	-63.82	-65.2454	-66.7695	-60.45	-60.816
basbasbn	6.25405	23.9711	-14.5	-53.56	58.74	-31.26	7.16	18.9	6.3	14.29	1.31	-6.72	12.53	0.6464	-1.98	21.44	-1.96955	-0.5	18.27	17.34	1.05695	-2.22	18.03	13.8637	13.98	18.03	17.6056	16.5634	18.71	18.7096	9.81	-1.89885	-3.23	-2.19	40.26	18.1851	16.88	16	0.2322	-2.1	15.05	9.93897	10.12	9.46	15	13.7525	12.3165	14.84	14.4733
basbasbp	-49.7774	-47.8553	-133.52	-84.33	31.62	-81.65	-32.1	-36.47	-49.61	-43.35	-60.62	-69.82	-43.47	-56.8509	-59.56	-33.05	-60.5007	-57.85	-41.46	-36.83	-55.3906	-58.46	-38.42	-43.2284	-42.96	-40.48	-40.9005	-42.1215	-36.55	-36.5506	-50.28	-63.7335	-64.87	-62.42	-16.44	-41.8905	-42.43	-39.99	-58.0991	-60.04	-44.96	-50.9524	-50.56	-50.71	-43.33	-44.7081	-46.3255	-42.17	-42.5337
basbasbsb	-61.6331	-59.9175	-190.6	-142	-2.27	-110.29	-37.51	-53.55	-65.61	-57.14	-72.68	-80.21	-55.39	-69.1541	-71.93	-45.38	-75.0652	-71.28	-57.79	-49.92	-69.2752	-72.1	-51.25	-56.2503	-55.86	-51.12	-51.5403	-52.758	-49.29	-49.2907	-61.92	-76.0634	-77.01	-74.75	-29.58	-56.5721	-56.44	-52.79	-71.8046	-73.31	-56.86	-63.23	-62.64	-63.09	-57.69	-59.116	-60.6928	-55.31	-55.6703
bbialbibsb	-101.219	-95.8389	-90.89	83.57	-101.71	-200.25	-128.28	-95.84	-112.4	-101.37	-110.99	-117.58	-92.79	-107.149	-109.73	-84.15	-118.551	-111.5	-100.11	-90.92	-111.669	-113.41	-92.04	-97.4265	-96.63	-90.45	-90.8654	-92.0352	-85.65	-85.6512	-97.63	-113.108	-113.26	-111.12	-70.7	-100.741	-98.45	-92.74	-113.433	-113.47	-94.41	-101.601	-100.38	-101.23	-98.08	-99.6822	-100.996	-94.75	-95.1025
bbibbibas	-79.2763	-75.1705	-138.77	-57.1	-47.46	-139.31	-87.77	-74.54	-88.45	-78.86	-89.54	-100.64	-73.29	-86.8966	-89.69	-64.64	-95.9281	-90.75	-79.41	-70.29	-89.7253	-92.14	-71.61	-76.6048	-76.08	-69.98	-70.4161	-71.5431	-67.29	-67.291	-77.93	-92.3085	-92.98	-91.18	-50.17	-77.9283	-76.93	-72.12	-91.3726	-92.29	-74.11	-80.6587	-79.83	-80.7	-77.21	-78.6925	-80.0832	-73.67	-74.0408
bbibbibp	-75.6845	-71.2286	-138.89	1.25	-47.18	-134.52	-86.56	-66.91	-81.77	-73.87	-85.61	-95.58	-69.71	-83.4062	-86.04	-60.81	-91.6603	-86.69	-73.69	-66.01	-85.4781	-87.83	-68.06	-73.0616	-72.54	-67.22	-67.6485	-68.7981	-63.43	-63.4309	-74.35	-88.6885	-89.32	-87.35	-45.78	-73.3473	-72.39	-67.96	-87.1897	-88.11	-70.74	-77.2417	-76.44	-77.11	-72.09	-73.519	-74.9857	-69.28	-69.6458
bbibbibsb	-89.4686	-87.1265	-194.64	149.88	-86.97	-173.18	-95.46	-86.17	-100.6	-90.07	-100.75	-109.96	-83.65	-97.5111	-100.15	-75.07	-107.778	-101.48	-92.29	-81.64	-101.549	-103.55	-82.85	-87.9732	-87.32	-81.43	-81.8743	-82.9868	-78.03	-78.0311	-88.63	-103.446	-103.81	-102.22	-61.22	-89.9926	-88.19	-83.49	-103.277	-103.68	-85.16	-91.951	-90.93	-92	-89.41	-90.9405	-92.2687	-85.13	-85.5049
bnbpbas	7.71545	24.4314	-103.72	-3.44	49.58	-27.82	1.38	21.89	7.76	14.71	1.4	-5.1	12.05	0.16453	-2.18	21.12	-1.66097	-0.21	19.55	17.42	1.2635	-1.78	16.97	12.82	12.96	16.93	16.5013	15.4643	18.57	18.5697	9.68	-1.89409	-3.07	-2.06	40.41	18.681	17.54	16.12	0.53438	-1.66	14.23	9.19654	9.38	8.86	16.45	15.2072	13.7774	13.9	13.5296
boalobs	-31.6896	-20.8459	-74.63	-101.2	67.49	-31.81	-26.21	-27.73	-29.38	-29.67	-36.78	-35.01	-23.91	-32.6455	-34.18	-17.37	-34.1245	-32.39	-24.29	-26.96	-38.7588	-40.81	-29.71	-32.5221	-32.4	-29.45	-29.6801	-30.3912	-34.47	-34.4701	-29.67	-38.0506	-38.71	-40.36	-4.09	-20.4109	-20.69	-28.76	-40.0384	-41.48	-32.54	-35.9706	-35.79	-37.32	-24.35	-25.0917	-26.1214	-33.79	-33.9883
boalsgase	-36.0135	-28.011	-179.44	-62.89	71.2	-19.06	-27.87	-30.74	-40.15	-37.57	-40.01	-34.74	-28.23	-39.7756	-42.87	-21.5	-46.0443	-44.07	-28.88	-30.18	-46.3402	-49.9	-35.34	-39.2433	-39.14	-32.73	-32.9931	-34.0094	-34.96	-34.9602	-31.47	-43.1307	-44.65	-43.93	-6.96	-29.6743	-30.9	-31.03	-46.7691	-49.18	-35.63	-40.6132	-40.41	-41.48	-27.72	-28.7381	-30.1601	-36.69	-36.9168
bpalpbas	-79.8693	-76.9083	-267.69	-62.89	6.11	-93.06	-77.54	-61.23	-79.91	-75.22	-91.41	-94.78	-72.77	-86.6578	-88.89	-62.87	-91.5118	-87.9	-66.85	-67.16	-86.4887	-88.85	-70.46	-75.5341	-75.08	-69.36	-69.764	-71.0344	-64.62	-64.6206	-79.31	-93.3349	-93.98	-91.21	-47.29	-73.7084	-73.34	-70.17	-89.0748	-90.3	-76.21	-82.5574	-81.92	-81.81	-69.6	-70.9765	-72.6422	-72.8	-73.1525
bpalpgap	-86.8489	-85.9813	-207.96	-59.37	-35.31	-89.89	-91.38	-67.04	-90.55	-87.46	-100.44	-97.61	-79.24	-93.4061	-96.3	-70.58	-100.435	-97.4	-72.46	-76.13	-95.9829	-99.05	-80.03	-85.3057	-84.95	-75.24	-75.6583	-77.0205	-74.94	-74.9408	-85.26	-99.7336	-100.87	-97.46	-56.27	-83.5115	-83.87	-78.68	-98.184	-99.96	-84.38	-91.0352	-90.52	-90.15	-76.83	-78.3035	-80.0576	-81.13	-81.4952
bpbpbas	-46.8455	-45.1491	-133.7	-27.45	27.06	-82.34	-35.09	-30.13	-44.24	-39.48	-58.08	-66.57	-40.91	-54.2657	-56.78	-30.17	-56.9324	-54.45	-36.88	-33.72	-52.1249	-55.08	-35.89	-40.6747	-40.41	-39.12	-39.5405	-40.7681	-33.75	-33.7505	-48.02	-61.3158	-62.37	-59.86	-13.19	-38.2254	-38.74	-37.12	-55.0221	-56.92	-42.91	-48.8139	-48.45	-48.43	-39.16	-40.5046	-42.1579	-39.68	-40.0448
bpbpbbi	-63.6204	-61.2378	-167.05	3.79	-22.39	-106.65	-64.65	-51.06	-66.66	-60.68	-73.71	-81.69	-59.05	-72.8215	-75.34	-49.58	-78.4192	-74.92	-58.57	-53.49	-72.7274	-75.41	-56.44	-61.4025	-61.02	-57.99	-58.4169	-59.6329	-54.48	-54.4806	-63.6	-77.5686	-78.42	-75.75	-33.63	-60.09	-60.01	-55.67	-74.4912	-75.98	-60	-66.252	-65.69	-65.78	-58.3	-59.6328	-61.3026	-56.45	-56.816
bpbpbn	9.32271	25.15	-102.57	34.4	51.2	-33.71	-1.59	25.04	11.83	17.82	-0.16	-5.22	13.55	1.86405	-0.19	23.21	1.36077	2.78	22.13	19.37	3.60182	0.83	18.94	14.8552	15.02	16.69	16.2593	15.2392	19.2	19.1997	9.85	-1.42413	-2.44	-1.51	42.45	21.4175	20.47	17.43	2.26006	0.24	14.82	9.91904	10.12	9.68	19.49	18.2647	16.8579	14.43	14.0576
bpbpbsb	-56.6808	-55.2292	-207.19	88.44	-17.73	-111.37	-43.23	-41.46	-55.65	-50.34	-67.94	-73.61	-51.08	-64.9057	-67.3	-40.52	-69.0075	-65.61	-49.5	-44.45	-63.6636	-66.28	-47.17	-52.1515	-51.77	-49.34	-49.7559	-50.9993	-44.67	-44.6706	-57.86	-71.7892	-72.59	-70.11	-23.91	-50.2481	-50.13	-47.64	-66.4009	-67.87	-53.37	-59.5966	-59.05	-59.14	-50.26	-51.5981	-53.2865	-50.16	-50.5188
bpoalpobte	-44.8448	-13.7018			-18.77	-94.24	-47.96	-26.79	-49.23	-38.65	-39.75	-39.13	-35.67	-50.6296	-54.07	-25.79	-61.7776	-55.21	-30.12	-31.36	-52.998	-55.89	-34.88	-40.1266	-39.5	-26.36	-26.6669	-27.8428	-22.5	-22.5002	-36.27	-52.2645	-53.07	-51.23	-4.8	-36.5527	-35.22	-31.74	-53.1968	-54.23	-34.84	-41.9274	-40.91	-42.16	-33.08	-34.3483	-35.9517	-34.04	-34.3005
bpoalpogapo	-59.5558	-38.1445			-54.55	-79.46	-41.46	-42.98	-68.02	-56.87	-57.59	-55.19	-49.23	-64.476	-68.59	-40.27	-78.4778	-71.8	-46.52	-47.11	-69.4559	-72.87	-51.8	-57.236	-56.6	-42.36	-42.6817	-43.86	-40.71	-40.7103	-51.24	-67.8948	-69.06	-66.65	-21.61	-54.6485	-53.73	-47.83	-70.1519	-71.44	-51.99	-59.4812	-58.41	-59.67	-48.81	-50.2638	-51.7433	-51.88	-52.148
bsalsbo	-10.4574	9.36814	-48.32	-123.4	152.98	-16.16	-9.69	0.48	-10.64	-8.54	-8.95	-9.52	-5.37	-16.0722	-17.85	2.09	-18.8465	-16.51	-0.92	-5.05	-19.664	-21.93	-8.56	-12.0793	-11.86	-7.01	-7.26924	-8.15486	-7.11	-7.11011	-6.75	-17.1396	-17.83	-18.39	19.46	-0.67968	-0.8	-5.44	-19.4809	-20.98	-8.45	-12.7875	-12.48	-13.71	-0.48	-1.35809	-2.63958	-8.82	-9.04443
bsalsbse	-39.7732	-20.7602	-331.25	-114.75	71.67	-40.53	-21.9	-24.74	-40.26	-36.66	-40.82	-44.06	-34.76	-47.5911	-49.68	-25.16	-51.7547	-48.13	-26.64	-30.72	-48.5904	-50.88	-35.24	-39.6108	-39.21	-32.38	-32.6557	-33.7375	-31.4	-31.4002	-37.84	-50.6743	-51.28	-50.34	-5.83	-30.6558	-30.19	-32.15	-49.5107	-50.74	-37.3	-42.8135	-42.26	-43.06	-31.82	-32.8278	-34.39	-37.25	-37.4902
bsalsegas	-53.7414	-44.205	187.03	-122.27	-12.73	-43.83	-34.28	-42.58	-57.35	-56.62	-55.68	-53.6	-45.29	-58.7059	-61.87	-37.25	-66.3348	-63.27	-43.98	-44.77	-63.7188	-67.11	-50.76	-55.4198	-55.13	-48.99	-49.2663	-50.4576	-49.33	-49.3302	-49.43	-63.1553	-64.48	-62.59	-21.14	-47.7195	-48.3	-46.23	-64.7854	-66.83	-52.17	-58.1611	-57.72	-58.37	-49.93	-51.0881	-52.7243	-51.97	-52.2079
bsalsegate	-54.5439	-42.3715	213.07	45.45	-22.05	-59.26	-37.98	-42.55	-61.02	-56.73	-57.01	-55.15	-46.58	-60.7128	-64.12	-37.86	-69.7618	-65.82	-43.96	-44.85	-65.0637	-68.45	-50.67	-55.6568	-55.26	-46.83	-47.1124	-48.343	-46.34	-46.3402	-50.34	-65.0829	-66.37	-64.15	-20.49	-49.1169	-49.35	-46.28	-66.205	-68.05	-52.15	-58.6832	-58.06	-58.77	-49.25	-50.4857	-52.1498	-51.5	-51.7406
bsalsgas	-58.5929	-50.7813	-89.75	-133.8	8.12	-49.73	-50.01	-47.97	-61.86	-60.48	-63.45	-59.59	-50.67	-63.7609	-66.63	-42.71	-70.5555	-67.62	-49.08	-50.17	-68.5505	-71.68	-56.47	-61.0127	-60.73	-54.2	-54.4701	-55.6467	-55.61	-55.6102	-55.38	-68.6648	-69.85	-68.19	-27.23	-52.8524	-53.31	-51.87	-69.8258	-71.73	-58.29	-64.0794	-63.65	-64.28	-54.01	-55.1354	-56.7483	-58.36	-58.5929
bsbalsbbas	-83.4437	-78.5595	-184.43	-233.17	-33.71	-159.55	-77.46	-72.87	-89.66	-80.1	-92.48	-95.28	-75.02	-89.6445	-92.16	-65.63	-98.6765	-92.94	-77.41	-71.31	-92.1636	-94.22	-72.87	-78.3055	-77.62	-70.8	-71.2101	-72.4678	-68.24	-68.241	-80.64	-96.0023	-96.37	-93.82	-50.9	-80.392	-78.86	-73.64	-94.2817	-94.82	-77.05	-84.1214	-83.11	-83.56	-78.24	-79.7262	-81.3016	-76.4	-76.7532
bsbbsbbas	-70.6328	-70.0127	-247.45	-165.01	-38.49	-137.62	-45.11	-63.8	-76.04	-66.86	-82.33	-87.6	-64.56	-78.6746	-81.32	-54.59	-85.8699	-81.04	-69.36	-59.84	-79.8237	-82.26	-61.28	-66.4421	-65.92	-60.63	-61.0519	-62.2691	-58.71	-58.7109	-71.34	-86.0168	-86.67	-84.57	-39.3	-67.4592	-66.57	-62.72	-82.4235	-83.44	-66.63	-73.2854	-72.5	-73.12	-68.14	-69.589	-71.147	-66.11	-66.4694
bsbbsbbbi	-85.5431	-84.8377	-294.75	95.65	-81.56	-168.94	-74.79	-81.2	-94.68	-84.41	-97.29	-103.56	-79.62	-93.7819	-96.35	-70.36	-103.172	-97.05	-87.72	-76.7	-96.9587	-98.97	-78.07	-83.2913	-82.64	-76.95	-77.3851	-78.5479	-74.15	-74.151	-85.65	-100.664	-101.02	-99.24	-56.09	-85.1556	-83.41	-79.06	-99.1481	-99.6	-81.76	-88.6248	-87.62	-88.55	-85.11	-86.6149	-88.0429	-81.83	-82.1975
bsbbsbbn	2.40578	23.881	22.48	-19.45	5.16	-71.42	2.25	13.64	-0.61	9.18	-2.36	-4.44	7.58	-5.10113	-7.68	16.12	-10.5082	-7.51	10.87	11.63	-6.076	-8.89	12.56	8.03698	8.35	14.93	14.5296	13.4338	14.65	14.6495	6.07	-6.78755	-7.78	-6.76	34.93	10.5148	10.18	10.9	-6.41031	-8.08	11.12	5.41077	5.88	5	9.24	8.01023	6.48768	10.12	9.77527
bsbbsbbp	-67.1882	-66.2267	-251.52	22.14	-47.71	-137.42	-46.29	-56.36	-69.57	-62.12	-78.72	-82.92	-61.09	-75.2688	-77.74	-50.85	-81.605	-76.99	-63.77	-55.7	-75.6694	-78.01	-57.89	-63.0517	-62.54	-58.13	-58.5474	-59.7819	-54.93	-54.9308	-67.97	-82.5749	-83.17	-80.93	-35.05	-62.9474	-62.09	-58.74	-78.3726	-79.38	-63.52	-70.1159	-69.36	-69.79	-63.1	-64.4977	-66.1248	-61.94	-62.2971
bsealsebs	-34.9275	-13.062	232.36	-56.16	33.76	-40.51	-4.79	-20.93	-35.47	-33.78	-31.88	-37.34	-29.05	-42.2219	-44.67	-19.45	-47.3414	-43.62	-22.41	-25.12	-43.5742	-46.19	-29.4	-33.8929	-33.51	-28.87	-29.1517	-30.2547	-25.69	-25.6902	-31.35	-44.6441	-45.43	-44.33	0.45	-25.4053	-25.11	-26.19	-44.1664	-45.6	-30.8	-36.5216	-35.96	-36.86	-29.41	-30.4568	-32.0488	-30.8	-31.0445
bsealsebte	-42.2884	-20.0023	172.51	160.48	18.77	-65.12	-14.29	-27.65	-45.92	-40.15	-41.72	-45.67	-36.34	-50.1729	-53.03	-26.39	-57.0974	-52.65	-28.53	-31.55	-51.1994	-54.02	-35.6	-40.4024	-39.95	-31.38	-31.6637	-32.8213	-28.69	-28.6902	-38.76	-53.0374	-53.91	-52.34	-6.28	-34.1489	-33.72	-32.75	-52.0349	-53.43	-37.46	-43.7087	-43.02	-43.92	-34.49	-35.6109	-37.2499	-36.97	-37.2138
bsealsegase	-59.2426	-48.3074	-54.94	4.97	-0.73	-39.99	-17.18	-46.1	-64.69	-60.13	-60.42	-60.43	-50.71	-64.5923	-68.02	-42.29	-73.5377	-69.8	-48.57	-49.25	-69.0746	-72.55	-55.17	-60.0232	-59.66	-50.43	-50.7152	-51.9028	-51.15	-51.1502	-54.84	-69.2815	-70.62	-68.56	-25.65	-53.7922	-54.16	-50.78	-70.2945	-72.24	-56.86	-63.212	-62.64	-63.46	-54.62	-55.8642	-57.4519	-56.43	-56.6733
bsealtegapo	-55.1036	-38.6899			-13.38	-60.4	-36.81	-40	-62.51	-54.59	-55.15	-53.74	-46.26	-61.2002	-64.95	-37.26	-72.843	-67.45	-43.4	-44.08	-65.7451	-69.13	-49.41	-54.7107	-54.17	-42.26	-42.5589	-43.7846	-41.3	-41.3003	-49.18	-65.1361	-66.33	-63.93	-19.01	-50.3255	-49.94	-45.19	-66.6927	-68.22	-50.37	-57.4964	-56.63	-57.59	-47.39	-48.7366	-50.3454	-49.94	-50.1919
btealtebpo	-47.3449	-19.6347			4.54	-78.23	-44.92	-29.9	-51.98	-41.92	-44.99	-45.14	-39.23	-54.1747	-57.21	-29.15	-64.4648	-57.87	-32.78	-34.37	-55.9123	-58.43	-38.06	-43.3068	-42.63	-31.19	-31.4896	-32.6743	-27.41	-27.4102	-40.77	-56.6262	-57.19	-55.46	-8.61	-39.949	-38.33	-35.2	-56.5169	-57.28	-39.15	-46.1781	-45.13	-46.3	-36.97	-38.2076	-39.8287	-38.18	-38.4347
btealtebse	-40.5976	-13.623	-141.78	-204.56	28.31	-54.16	-29.09	-23.54	-42.95	-35.7	-36.78	-38.95	-33.44	-48.0649	-50.99	-23.37	-56.5761	-51.12	-27.36	-28.76	-49.6442	-52.33	-32.99	-38.0694	-37.51	-28.33	-28.6208	-29.8132	-24.47	-24.4702	-34.8	-50.0351	-50.75	-49.07	-2.44	-32.3757	-31.36	-29.49	-50.0384	-51.16	-33.74	-40.4173	-39.56	-40.6	-33.47	-34.6168	-36.322	-33	-33.2495
btealtegate	-59.0177	-42.3719	-16.96	-117.72	-22.67	-78.91	-52.8	-44.27	-67.29	-58.43	-59.95	-59.77	-50.31	-65.7447	-69.37	-41.1	-77.9978	-72.01	-47.7	-47.48	-69.8957	-73.03	-53.06	-58.5844	-57.95	-46.17	-46.4662	-47.7454	-45.04	-45.0403	-53.25	-69.777	-70.78	-68.22	-22.83	-55.2298	-54.38	-48.65	-70.9224	-72.16	-54.12	-61.5524	-60.56	-61.49	-53.54	-54.8779	-56.5804	-52.42	-52.6692
ga3n3	-96.4544	-112.504	18.25	-91.27	-89.97	-57.25	-115.36	-94.32	-106.74	-103.96	-117.47	-97.54	-81.98	-92.6453	-98.15	-77.9	-100.08	-102.38	-96	-89.09	-103.768	-110.59	-98.49	-102.2	-102.82	-92.99	-93.4211	-94.5281	-99.43	-99.4304	-92.53	-103.246	-107.06	-105.63	-71.88	-92.5163	-97.95	-92.29	-106.574	-112.09	-102.6	-107.248	-107.96	-108.91	-93.15	-94.6702	-95.988	-106.87	-107.234
ga3o3	-106.247	-124.68	-0.73	-145.74	5.97	-54.06	-115.29	-114.2	-107	-112.43	-120.26	-101.89	-88.11	-96.2398	-101.41	-85.32	-103.003	-105.36	-105.28	-96.97	-108.276	-114.64	-109.14	-111.791	-112.42	-106.17	-106.383	-107.268	-110.16	-110.16	-100.52	-108.761	-112.37	-112.87	-83.93	-100.308	-105.59	-100.75	-111.748	-116.9	-114.23	-117.642	-118.37	-120.17	-100.63	-101.582	-102.734	-121.65	-121.831
ga3po3	-63.5623	-54.2135			-66.92	-77.77	-54.23	-49.22	-78.31	-66.68	-65.75	-62.24	-53.33	-68.7424	-74.42	-46.09	-85.8016	-80.99	-53.57	-52.97	-75.8063	-80.99	-59.52	-65.145	-64.75	-47.89	-48.2458	-49.4918	-51.28	-51.2804	-56.57	-73.6941	-76.15	-72.72	-30.14	-63.9041	-65.18	-53.97	-76.9276	-79.69	-59.64	-67.4854	-66.74	-67.85	-57.65	-59.3702	-60.8105	-62.03	-62.3155
ga3s3	-76.0459	-80.7223	-58.92	-120.93	-51.49	-60.73	-85.18	-71.84	-85.38	-82.85	-86.92	-75.55	-65.58	-78.8191	-83.83	-59.56	-89.1657	-88.65	-71.56	-68.06	-86.9258	-92.52	-76.78	-81.5307	-81.62	-72.21	-72.4957	-73.8213	-76.43	-76.4303	-72.18	-85.9831	-88.89	-86.07	-48.34	-74.8885	-78.22	-70.19	-88.8072	-92.78	-78.62	-84.7983	-84.84	-85.35	-75.89	-77.3174	-78.9605	-80.6	-80.8391
ga3se3	-71.7972	-72.5166	19.3	56.03	-33.1	-46.24	-44.18	-62.92	-82.99	-77.94	-77.83	-72.07	-61.78	-75.805	-80.96	-55.29	-88.1881	-86.36	-65.92	-62.96	-83.2551	-88.65	-71.22	-76.2762	-76.18	-63.58	-63.8868	-65.1761	-68.56	-68.5603	-67.48	-82.4137	-85.13	-82.15	-42.38	-71.3503	-74	-64.84	-84.9934	-88.52	-72.67	-79.4017	-79.17	-79.93	-71.65	-73.2102	-74.74	-73.74	-73.9936
ga3te3	-65.2971	-60.1172	-85.46	-147.4	-42.35	-76.22	-71.14	-53.37	-79.29	-70.24	-69.99	-68.32	-56.03	-71.4864	-76.91	-48.73	-86.8775	-83.17	-57.63	-55.33	-78.042	-83.23	-62.92	-68.611	-68.3	-53.27	-53.5937	-54.9695	-56.84	-56.8404	-60.1	-76.9735	-79.47	-75.83	-33.51	-66.3633	-68.1	-56.72	-79.455	-82.43	-63.56	-71.3176	-70.73	-71.48	-64.32	-65.935	-67.6203	-63.46	-63.7223
gaasgaasgan	-90.4188	-93.8867	-53.72	-51.99	-59.13	-82.06	-112.06	-80.83	-101.98	-95.08	-102.65	-95.19	-79.68	-92.983	-98.2	-74.17	-104.124	-103.77	-83.39	-81.45	-100.428	-106.2	-86.94	-91.885	-92.01	-80.74	-81.183	-82.497	-82.57	-82.5709	-84.9	-98.8875	-101.93	-98.36	-63.26	-89.8457	-93.45	-83.08	-101.885	-105.97	-88.62	-95.0453	-95.1	-95.31	-88.24	-89.8007	-91.4916	-87.92	-88.3045
gaasgaasgap	-105.368	-108.42	-159.48	-71.18	-48.54	-97.83	-121.52	-89.35	-116.02	-108.79	-117.18	-112.12	-95.65	-109.912	-114.74	-89.38	-121.998	-120.28	-93.48	-94.81	-115.283	-120.31	-99.08	-104.538	-104.44	-90.74	-91.1958	-92.6095	-92.75	-92.7512	-100.57	-115.71	-118.23	-113.77	-77.74	-106.501	-108.91	-96.61	-116.979	-120.24	-101.45	-108.578	-108.33	-108.05	-101.85	-103.655	-105.278	-97.56	-97.946
gaasgaasgasb	-109.65	-110.989	-177.53	-143.95	-64.19	-120.27	-120.9	-96.15	-122.56	-113.01	-119.97	-115.84	-100.33	-114.893	-119.74	-94	-128.429	-125.75	-99.59	-99.15	-120.257	-125.04	-102.74	-108.355	-108.12	-95.25	-95.7118	-97.1015	-95.96	-95.9613	-104.5	-120.192	-122.53	-118.03	-82.08	-112.062	-113.89	-100.64	-121.738	-124.6	-104.64	-112.086	-111.65	-111.52	-108.6	-110.429	-112.012	-99.53	-99.9182
gaasinasgap	-109.284	-109.681	-26.54	-126.13	-57.26	-121.01	-123.24	-93.31	-119.03	-110.99	-120.26	-116.93	-97.2	-111.553	-115.39	-91.4	-124.689	-120.92	-96.77	-96.65	-117.32	-120.91	-101.5	-107.03	-106.63	-94.35	-94.817	-96.1491	-94.03	-94.0313	-101.95	-117.284	-118.8	-115.54	-80.26	-109.467	-109.95	-98.32	-118.927	-120.79	-103.45	-110.714	-110.06	-110.28	-106.44	-108.299	-109.722	-100.11	-100.503
gaasinngap	-100.655	-104.386	28.71	-95.8	-74.54	-106.66	-127.18	-90.96	-110.6	-104.85	-115.38	-104.76	-87.9	-101.094	-105.13	-82.84	-112.607	-110.36	-93.3	-89.98	-108.788	-112.96	-96.74	-101.702	-101.56	-91.63	-92.0794	-93.3343	-92.41	-92.411	-93.96	-107.861	-109.83	-107.58	-73.25	-99.6313	-101.23	-91.92	-110.578	-113.2	-98.76	-105.206	-104.9	-105.52	-98.61	-100.219	-101.724	-99.5	-99.8881
gabiinbigasb	-127.128	-122.356	-160.31	-647.46	-142.78	-173.5		-116.69	-143.71	-130.94	-136.07	-134.5	-117.26	-131.969	-135.73	-111.18	-148.633	-141.88	-119.66	-116.7	-138.401	-141.13	-119.55	-125.311	-124.55	-113.91	-114.404	-115.598	-109.62	-109.622	-120.29	-136.676	-137.56	-134.27	-100.06	-131.823	-130.47	-117.65	-139.554	-140.18	-120.16	-128.06	-126.83	-127.52	-128.45	-130.386	-131.562	-116.51	-116.919
gangapgaas	-88.6727	-93.8481	-101.83	-47.03	-68.24	-78.48	-117.68	-78.57	-100.13	-94.66	-103.5	-93.73	-78.86	-92.0394	-97.21	-73.25	-102.451	-102.42	-82.12	-80.78	-99.4836	-105.3	-86.64	-91.5413	-91.71	-80.44	-80.8837	-82.2177	-82.99	-82.9909	-84.66	-98.423	-101.51	-97.95	-62.6	-88.6799	-92.43	-82.66	-101.156	-105.35	-88.69	-95.0078	-95.14	-95.24	-86.16	-87.7089	-89.433	-88.68	-89.065
ganinngap	-107.715	-116.972	49.09	-95.69	-93.15	-97.02	-135.34	-102.86	-117.1	-113.42	-127.43	-108.8	-92.94	-104.887	-109.02	-88.52	-114.661	-113.6	-104.29	-97.58	-114.35	-118.98	-106.83	-111.18	-111.29	-102.78	-103.222	-104.376	-105.37	-105.371	-101.71	-114.067	-116.38	-115.32	-81.21	-104.813	-107.2	-100.35	-116.859	-120.13	-110.05	-115.621	-115.65	-116.7	-105.66	-107.195	-108.57	-113.28	-113.66
gaogasgase	-85.1711	-94.1928	-6.12	-59.1	-24.67	-55.64	-81	-85.56	-91.54	-91.07	-96.16	-84.39	-72.25	-83.959	-89.36	-67.28	-93.6717	-94.22	-82.8	-76.75	-93.4097	-99.62	-86.44	-90.5404	-90.83	-83.2	-83.4719	-84.6436	-86.78	-86.7803	-80.33	-92.5297	-95.88	-94.05	-59.1	-82.8253	-87.14	-79.25	-95.6627	-100.29	-89.05	-94.4112	-94.69	-95.73	-84.25	-85.5264	-87.0245	-93.13	-93.3594
gaoinogas	-114.394	-128.387	-64.62	-131.15	-7.85	-91.62	-125.03	-118.01	-115.57	-117.84	-129.35	-110.44	-94.21	-104.029	-108.19	-90.88	-113.084	-112.57	-111.32	-101.15	-115.028	-119.74	-113.85	-117.227	-117.45	-111.76	-112.011	-112.972	-114	-114	-106.05	-116.259	-118.7	-119.39	-88.24	-108.283	-111.01	-104.91	-118.555	-121.99	-118.69	-123.108	-123.28	-125.17	-110.55	-111.708	-112.851	-125.68	-125.89
gaoinotlo	-117.178	-128.588	-148.73	-133.08	3.92	-78.5	-128.24	-120.87	-113.42	-118.61	-129.02	-119.04	-92.19	-100.524	-103.94	-89.96	-109.359	-107.98	-113.67	-99.95	-111.727	-115.45	-114.27	-117.083	-117.25	-114.12	-114.368	-115.129	-111.91	-111.91	-104.17	-112.911	-114.76	-117.81	-89.51	-106.929	-108.59	-103.69	-115.282	-117.89	-118.65	-122.384	-122.45	-125.32	-110.39	-111.511	-112.298	-125.85	-126.054
gapgapgaas	-102.557	-106.807	-189.08	-77.79	-60.66	-95.16	-129.43	-85.46	-112.99	-107.12	-116.42	-109.42	-93.6	-107.787	-112.57	-87.27	-119.215	-117.85	-90.64	-92.95	-113.219	-118.32	-97.54	-102.968	-102.91	-88.77	-89.2213	-90.6643	-91.58	-91.5811	-98.95	-113.911	-116.48	-112.02	-75.75	-104.078	-106.67	-94.92	-115.046	-118.43	-100.17	-107.206	-107.04	-106.64	-98.32	-100.095	-101.778	-96.81	-97.1935
gapgapgan	-88.1864	-94.7037	-164.27	-42.23	-79.53	-73.9	-125.56	-77.35	-99.35	-95.18	-105.2	-93.37	-78.97	-92.0086	-97.13	-73.26	-101.682	-101.97	-81.8	-81.02	-99.4233	-105.28	-87.22	-92.074	-92.29	-81.16	-81.6043	-82.9576	-84.18	-84.1808	-85.31	-98.834	-101.96	-98.43	-62.87	-88.4137	-92.32	-83.13	-101.293	-105.6	-89.65	-95.8562	-96.06	-96.04	-85.13	-86.6674	-88.4226	-90.17	-90.5554
gapgapgasb	-103.465	-106.921	-236.11	-105.2	-89.47	-119.64	-137.53	-87.53	-115.68	-108.87	-117.47	-109.59	-95.59	-110.063	-114.84	-89.17	-122.328	-120.42	-93.13	-94.73	-115.524	-120.46	-98.98	-104.556	-104.42	-90.37	-90.8193	-92.2763	-92.89	-92.8912	-100.44	-115.827	-118.28	-113.73	-77.38	-106.568	-108.82	-96.53	-117.235	-120.38	-101.27	-108.558	-108.27	-107.9	-100.81	-102.569	-104.294	-97.11	-97.4907
gapinpgaas	-110.158	-112.108	-348.98	-139.83	-76.72	-123.78	-138.57	-93.27	-119.41	-112.71	-123.08	-116.91	-98.68	-112.939	-116.74	-92.87	-125.448	-122.05	-97.77	-98.32	-118.763	-122.43	-103.53	-109.024	-108.67	-95.31	-95.7716	-97.1307	-96.97	-96.9712	-103.81	-118.947	-120.52	-117.25	-82.04	-110.766	-111.46	-100.15	-120.493	-122.5	-105.66	-112.826	-112.24	-112.36	-105.55	-107.378	-108.855	-102.83	-103.219
gapogapogas	-67.0604	-62.6248			-61.48	-74.49	-62.58	-56.06	-79.87	-71.54	-72.06	-66.52	-56.78	-71.5596	-77.09	-49.95	-86.3304	-83.28	-59.01	-57.44	-79.1128	-84.55	-64.69	-70.0737	-69.86	-55.47	-55.7978	-57.0941	-59.12	-59.1204	-61.11	-77.2073	-79.91	-76.52	-35.55	-66.9413	-69.16	-58.8	-80.4718	-83.76	-65.37	-72.7116	-72.26	-73.09	-62.94	-64.5652	-66.1121	-68.13	-68.3977
gapogapogase	-65.9271	-59.9622			-55.29	-68.57	-49.06	-53.33	-79.54	-70.3	-69.45	-65.36	-55.77	-70.7852	-76.32	-48.75	-86.2734	-82.58	-57.31	-55.96	-78.0595	-83.36	-63.11	-68.5743	-68.28	-52.69	-53.0265	-54.2979	-56.66	-56.6604	-59.86	-76.3171	-78.89	-75.55	-33.75	-65.9865	-67.82	-57.26	-79.3937	-82.46	-63.7	-71.2077	-70.64	-71.6	-61.86	-63.5275	-65.0161	-65.94	-66.2132
gapogapogate	-64.1145	-56.2321			-55.99	-78.68	-61.59	-50.59	-78.64	-67.88	-67.15	-64.25	-54.26	-69.7091	-75.31	-46.97	-86.2117	-81.78	-54.91	-53.77	-76.6028	-81.8	-60.67	-66.3239	-65.96	-49.66	-50.0042	-51.2957	-53.12	-53.1204	-57.75	-74.8147	-77.29	-73.78	-31.25	-64.7517	-66.2	-54.89	-77.8115	-80.66	-60.96	-68.7862	-68.09	-69.07	-59.86	-61.5456	-63.0709	-62.6	-62.877
gapoinpogate	-67.2274	-58.4255			-52.07	-99.64	-60.09	-52.85	-79.91	-68.63	-68.17	-70.11	-54.66	-70.1015	-74.6	-47.85	-87.5091	-80.99	-57.31	-54.31	-77.2098	-80.83	-61.75	-67.4641	-66.79	-51.87	-52.2352	-53.4357	-53.01	-53.0104	-58.23	-75.3984	-76.8	-74.55	-33.06	-66.7171	-66.15	-55.44	-78.4855	-79.83	-61.87	-69.8164	-68.69	-70.18	-62.96	-64.6881	-66.019	-65.09	-65.3817
gapoinpotlpo	-63.868	-50.5969			-74.1	-101.73	-65.89	-50.11	-77.13	-63.39	-62.09	-62.81	-49.33	-64.5737	-68.16	-43.53	-83.9465	-75.08	-54.03	-48.71	-71.4941	-73.65	-56.34	-62.0348	-61.05	-48.58	-49.0007	-50.0232	-47.44	-47.4404	-51.47	-68.6893	-69.08	-68.44	-29.29	-63.1316	-60.56	-49.26	-72.3029	-72.18	-55.07	-63.1161	-61.52	-63.8	-60.04	-61.8966	-62.8695	-57.23	-57.5626
gasbgasbgap	-107.324	-109.35	-241.3	-186.6	-101.79	-141.25	-138.53	-94.03	-121.61	-112.56	-119.92	-113.14	-99.78	-114.514	-119.3	-93.26	-128.171	-125.25	-98.83	-98.6	-119.974	-124.64	-102.21	-107.928	-107.66	-94.37	-94.823	-96.2529	-95.55	-95.5513	-104.06	-119.963	-122.21	-117.64	-81.28	-111.627	-113.27	-100.16	-121.542	-124.27	-104.18	-111.769	-111.28	-111.07	-107.23	-109.02	-110.686	-99	-99.3814
gasegasegapo	-68.6337	-66.059			-43.21	-58.01	-46.33	-57.99	-81.11	-74.13	-73.5	-68.73	-58.69	-73.2189	-78.57	-51.92	-87.0995	-84.42	-61.52	-59.38	-80.5961	-85.96	-67.06	-72.329	-72.14	-58.07	-58.391	-59.6758	-62.51	-62.5103	-63.55	-79.2493	-81.91	-78.73	-37.93	-68.5079	-70.81	-60.96	-82.1226	-85.44	-68.08	-75.2069	-74.82	-75.65	-66.61	-68.2248	-69.7409	-69.91	-70.173
gasegasegas	-73.0609	-75.2676	-4.9	3.62	-39.8	-51.38	-58.12	-65.91	-83.69	-79.53	-80.79	-73.33	-63.08	-76.8235	-81.93	-56.77	-88.5005	-87.16	-67.79	-64.68	-84.4713	-89.94	-73.03	-77.9827	-77.96	-66.53	-66.8305	-68.1329	-71.2	-71.2003	-69.02	-83.554	-86.34	-83.39	-44.46	-72.562	-75.47	-66.62	-86.2348	-89.93	-74.58	-81.1223	-80.99	-81.64	-72.99	-74.5092	-76.0758	-76.08	-76.3294
gasegasegate	-69.1664	-67.9408	-15.61	-2.14	-35.94	-56.12	-51.42	-59.5	-81.54	-75.31	-74.87	-70.61	-59.69	-74.1897	-79.43	-52.93	-87.5305	-85.14	-62.95	-60.25	-81.3499	-86.69	-68.23	-73.5029	-73.34	-60.11	-60.4216	-61.7428	-64.5	-64.5003	-64.74	-80.3145	-82.97	-79.75	-39.21	-69.4315	-71.82	-61.92	-82.9346	-86.29	-69.34	-76.4165	-76.07	-76.81	-68.95	-70.5268	-72.1152	-70.23	-70.4861
gaseinsegas	-75.9425	-76.4764	5.15	139.56	-30.95	-69.66	-57.6	-68.37	-83.82	-79.68	-82.2	-78.97	-62.73	-76.507	-80.52	-56.91	-89.2306	-85.72	-69.71	-64.59	-84.509	-88.39	-73.55	-78.5728	-78.24	-68.27	-68.5886	-69.806	-70.19	-70.1903	-68.71	-83.401	-85.11	-83.44	-45.58	-74.0008	-74.83	-66.51	-86.3096	-88.47	-74.87	-81.5499	-80.99	-82.16	-75.18	-76.7748	-78.1188	-77.44	-77.7
gaseinsegate	-76.5916	-74.611	86.92	272.87	-34.88	-79.22	-55.92	-66.72	-86.65	-80.09	-81.42	-79.31	-63.74	-78.2001	-82.3	-57.5	-92.5083	-87.93	-69.59	-64.55	-85.6731	-89.36	-73.43	-78.7548	-78.28	-66.56	-66.8927	-68.12	-69.36	-69.3604	-69.28	-84.9354	-86.47	-84.6	-45.1	-75.4606	-75.73	-66.39	-87.4887	-89.29	-74.64	-81.8307	-81.05	-82.31	-75.97	-77.6046	-78.9744	-76.64	-76.9096
gaseinsetlse	-73.1952	-69.4723	-145.95	-47.76	-37.24	-71.31	-62.74	-64.8	-80.98	-74.14	-76.13	-73.42	-58.08	-71.8792	-74.96	-53.04	-86.7331	-80.73	-67.02	-59.16	-79.3279	-81.66	-68.67	-73.7863	-73.11	-62.99	-63.3606	-64.4319	-63.22	-63.2204	-62.83	-77.8364	-78.48	-78.3	-42.22	-71.3422	-70.02	-60.65	-80.8258	-81.42	-68.76	-75.6897	-74.63	-76.53	-72.28	-74.0525	-75.0378	-70.73	-71.0262
gasgasgapo	-71.2844	-71.577			-52.42	-68.89	-74.62	-63.73	-82.3	-77.05	-79.25	-71.09	-60.99	-75.0225	-80.33	-54.58	-87.517	-85.92	-65.11	-62.59	-82.9021	-88.48	-70.53	-75.6148	-75.57	-63.67	-63.9764	-65.2974	-67.56	-67.5603	-66.4	-81.3612	-84.22	-81.05	-41.77	-70.6997	-73.61	-64.31	-84.4956	-88.2	-71.77	-78.5435	-78.36	-78.98	-69.15	-70.6753	-72.2907	-74.39	-74.6435
gasgasgase	-74.5048	-78.0581	-30.36	-54.07	-45.73	-56.25	-71.81	-68.93	-84.5	-81.21	-83.86	-74.51	-64.36	-77.8418	-82.9	-58.21	-88.8462	-87.94	-69.67	-66.39	-85.7065	-91.24	-74.9	-79.7509	-79.79	-69.4	-69.6932	-71.0079	-73.84	-73.8403	-70.58	-84.7383	-87.59	-84.69	-46.48	-73.7746	-76.91	-68.41	-87.5147	-91.35	-76.57	-82.9282	-82.89	-83.45	-74.4	-75.8743	-77.4792	-78.41	-78.6544
gasgasgate	-71.8538	-73.3019	-73.99	-124.19	-49.8	-66.07	-78.92	-65.33	-82.8	-78.28	-80.68	-72.92	-62.01	-75.9904	-81.17	-55.58	-87.9096	-86.55	-66.59	-63.49	-83.6449	-89.17	-71.73	-76.8089	-76.78	-65.85	-66.1473	-67.5009	-69.62	-69.6203	-67.63	-82.4447	-85.27	-82.12	-43.01	-71.5602	-74.51	-65.32	-85.3171	-89.04	-73.08	-79.7919	-79.65	-80.19	-71.55	-73.0372	-74.7173	-74.66	-74.9066
gasinsgao	-83.1485	-89.1663	-67.92	-93.45	-33.99	-77.29	-80.69	-83.38	-86.51	-86.5	-92.5	-90.76	-67.79	-79.3719	-83.69	-63.17	-89.3251	-88.11	-79.7	-72.31	-88.7671	-93.51	-82.42	-86.5	-86.55	-81.6	-81.8762	-82.9837	-81.48	-81.4803	-74.99	-87.0696	-89.44	-88.82	-55.38	-78.8893	-81.35	-74.46	-90.6799	-93.97	-84.03	-89.3663	-89.32	-90.77	-80.58	-81.9011	-83.2098	-89.09	-89.3196
gasinsgase	-82.3253	-84.7803	-102.94	-225.78	-53.45	-84.6	-78.64	-75.9	-89.41	-85.78	-90.78	-83.97	-68.56	-82.0379	-85.98	-62.9	-94.0647	-90.97	-76.36	-70.82	-90.2138	-94.13	-80.22	-85.1313	-84.86	-75.64	-75.9512	-77.1778	-78.22	-78.2203	-75.21	-89.4917	-91.24	-89.66	-52.52	-80.0641	-81.09	-72.98	-92.2224	-94.51	-81.94	-88.4256	-87.95	-89.04	-80.75	-82.3	-83.6747	-84.95	-85.205
gasinstls	-78.9247	-78.9936	-122.09	-122.19	-54.84	-91.8	-98.43	-75.92	-83.91	-80.07	-87.91	-78.93	-62.44	-75.4879	-78.51	-57.79	-88.3653	-83.71	-73.52	-64.87	-83.666	-86.29	-74.83	-79.6496	-79.18	-72.61	-72.953	-74.076	-71.22	-71.2204	-68.16	-82.0851	-82.99	-82.92	-48.75	-75.617	-75.02	-66.64	-85.3372	-86.44	-75.37	-81.7631	-81	-82.65	-76.79	-78.4557	-79.5438	-78.41	-78.6864
gategategapo	-64.7225	-58.2097			-46.86	-78.3	-66.66	-51.97	-78.98	-69.08	-68.6	-66.26	-55.15	-70.6257	-76.15	-47.85	-86.6	-82.54	-56.27	-54.56	-77.3692	-82.58	-61.82	-67.499	-67.16	-51.47	-51.803	-53.1387	-54.98	-54.9804	-58.94	-75.934	-78.43	-74.84	-32.35	-65.5731	-67.18	-55.82	-78.6849	-81.6	-62.29	-70.0913	-69.45	-70.32	-62.07	-63.7195	-65.3291	-63.1	-63.369
gategategas	-68.2913	-66.3463	-81.07	-131.71	-47.17	-71.02	-73.16	-59.04	-80.69	-74.01	-74.93	-70.38	-58.72	-73.4624	-78.79	-51.86	-87.0996	-84.67	-61.87	-59.16	-80.6329	-86.03	-67.07	-72.4693	-72.3	-59.49	-59.7987	-61.1711	-63.01	-63.0103	-63.54	-79.4048	-82.1	-78.66	-37.93	-68.6313	-71.05	-60.76	-82.1664	-85.56	-68.04	-75.2887	-74.93	-75.56	-67.6	-69.1489	-70.8469	-68.89	-69.1436
gategategase	-67.1527	-63.792	-49.76	-65.96	-38.97	-66.03	-59.9	-56.29	-80.27	-72.71	-72.29	-69.31	-57.71	-72.691	-78.03	-50.68	-87.0401	-84.02	-60.17	-57.66	-79.571	-84.84	-65.46	-70.9454	-70.71	-56.65	-56.9669	-58.3174	-60.57	-60.5703	-62.28	-78.5051	-81.09	-77.66	-36.19	-67.7162	-69.79	-59.2	-81.0802	-84.26	-66.33	-73.7498	-73.29	-74.03	-66.5	-68.0956	-69.7357	-66.78	-67.0388
gateintegapo	-70.075	-62.8773			-59.13	-108.71	-69.23	-56.95	-82.44	-72.07	-72.35	-73.27	-57.52	-72.9724	-77.4	-50.7	-89.8325	-83.69	-61.09	-57.18	-80.0338	-83.68	-65.11	-70.8412	-70.19	-56.47	-56.8236	-58.0653	-58.09	-58.0904	-61.6	-78.6801	-80.1	-77.81	-36.3	-69.6472	-69.26	-58.52	-81.4856	-82.92	-65.51	-73.4223	-72.35	-73.74	-67.64	-69.3352	-70.7405	-67.34	-67.623
gateintegase	-69.9993	-64.4839	-170.41	-332.87	-43	-91.99	-58.67	-57.17	-80.08	-71.97	-71.74	-74.3	-56.89	-71.8581	-76.1	-50.36	-87.1585	-82.03	-61.44	-57.02	-78.9876	-82.69	-65.27	-70.8118	-70.27	-57.46	-57.7971	-59.0564	-58.82	-58.8204	-61.37	-77.6961	-79.21	-77.04	-36.82	-68.5315	-68.59	-58.48	-80.4731	-82.15	-65.82	-73.3556	-72.46	-73.7	-68.11	-69.7683	-71.1906	-67.67	-67.9418
gateintetlte	-65.94	-56.7729	-195.37	-130.93	-51.03	-112.06	-84.26	-53.96	-77.79	-66.66	-66.2	-68.63	-51.77	-67.01	-70.39	-45.93	-84.7784	-77.02	-58.01	-50.95	-73.5464	-75.75	-59.68	-65.4317	-64.53	-52.7	-53.0832	-54.2397	-51.94	-51.9404	-54.86	-71.7991	-72.26	-71.41	-32.59	-65.5033	-63.4	-51.93	-74.696	-74.81	-58.95	-66.9014	-65.47	-67.39	-65.76	-67.5294	-68.7242	-59.18	-59.484
ge3as3	-96.0428	-98.5815	-121.73	-182.47	-20.13	-46.57	-69.02	-84.84	-92.8	-93.8	-109.95	-104.79	-81.93	-94.2203	-96	-73.12	-101.589	-96.26	-90.34	-81.83	-99.6603	-100.78	-88.67	-93.3339	-92.6	-78.89	-79.1236	-80.2079	-86.04	-86.0403	-96.31	-109.434	-109.41	-110.54	-63.61	-88.4949	-86.7	-87.35	-105.124	-104.96	-98.05	-104.198	-103.13	-105.14	-89.1	-90.1492	-91.5795	-97.04	-97.2393
ge3bi3	-98.1521	-95.6809	-204.58	-93.16	-84.01		-139.61	-81.79	-97.21	-93.18	-108.75	-108.84	-82.14	-94.6988	-96.59	-74.66	-106.515	-98.91	-85.68	-82.44	-101.049	-101.69	-88.68	-93.5601	-92.59	-74.66	-74.9241	-75.9299	-71.3	-71.3003	-93.94	-107.91	-107.5	-108.95	-65.28	-92.2417	-89.16	-86.79	-105.567	-104.6	-95.62	-102.32	-100.84	-103.34	-84.72	-86.0054	-87.125	-99.76	-99.9782
ge3n3	-124.816	-154.443	-40.33	-104.58	-66.3	-22.75	-64.59	-120.7	-117.12	-120.43	-145.54	-121.73	-103.32	-113.138	-116.41	-96.33	-117.235	-115.95	-123.48	-111.28	-124.905	-128.8	-121.75	-124.954	-125.07	-115.09	-115.274	-116.224	-128.21	-128.21	-127.02	-136.886	-138.66	-140.73	-96.06	-115.577	-117.34	-119.81	-133.029	-135.87	-136.9	-140.982	-141.03	-143.41	-119.83	-120.453	-121.986	-142.43	-142.591
ge3p3	-98.8568	-103.001	-355.1	-231.56	-47.25	-44.54	-80.29	-84.83	-93.4	-97.1	-113.39	-106.32	-84.58	-96.1616	-97.94	-75.06	-100.755	-96.77	-92.85	-84.55	-101.146	-102.57	-91.96	-96.3613	-95.8	-87.98	-88.1993	-89.3132	-94.8	-94.8003	-99.77	-111.925	-112.18	-113.47	-65.68	-88.4451	-87.45	-90.48	-106.944	-107.27	-101.9	-107.58	-106.78	-108.56	-88.59	-89.5077	-91.0595	-98.79	-98.9788
ge3sb3	-100.146	-105.225	-237.61	-29.92	-80.94	-82.66	-112.16	-86.12	-97.07	-95.11	-113.78	-111.59	-84.35	-97.1532	-98.99	-76	-107.203	-100.49	-90.92	-84.13	-102.957	-103.78	-90.63	-95.6173	-94.71	-76.4	-76.6438	-77.7582	-78.64	-78.6403	-98.17	-112.177	-111.9	-112.97	-67.08	-93.809	-91.23	-89.38	-108.292	-107.61	-99.58	-106.294	-104.95	-107.12	-89.39	-90.5711	-91.9349	-100.74	-100.944
geasgeasgebi	-96.0191	-96.5869	-151.72	-157.52	-38.12	-61.63	-95.42	-83.42	-93.83	-93.39	-109.21	-105.24	-81.44	-93.8591	-95.71	-73.06	-102.695	-96.73	-88.13	-81.35	-99.5112	-100.52	-88.05	-92.8085	-92	-76.29	-76.5319	-77.5995	-80.7	-80.7003	-94.96	-108.404	-108.29	-109.49	-63.53	-89.1356	-87.01	-86.5	-104.681	-104.29	-96.64	-102.999	-101.81	-103.95	-87.04	-88.1681	-89.5114	-97.25	-97.4545
geasgeasgen	-108.913	-119.464	-62.07	-143.68	-36.79	-33.32	-70.29	-102.05	-103.64	-105.81	-125.78	-114.79	-91.58	-103.129	-105.34	-83.44	-109.355	-105.4	-106.33	-95.17	-111.693	-113.69	-102.84	-107.021	-106.57	-97.08	-97.3009	-98.3389	-105.1	-105.1	-109.55	-121.632	-122.18	-124.04	-77.32	-100.439	-99.81	-101.83	-118.162	-118.99	-114.28	-119.726	-119.04	-121.37	-103.94	-104.794	-106.321	-115.41	-115.601
geasgeasgep	-97.011	-100.097	-194.05	-227.71	-27.38	-46.6	-73.16	-84.85	-92.91	-95.07	-111.18	-105.4	-82.93	-94.9851	-96.77	-73.87	-101.401	-96.55	-91.26	-82.82	-100.244	-101.48	-89.86	-94.4385	-93.76	-82.14	-82.3687	-83.4644	-89.14	-89.1403	-97.55	-110.351	-110.43	-111.59	-64.39	-88.5536	-87.06	-88.47	-105.812	-105.82	-99.41	-105.403	-104.43	-106.35	-88.96	-89.9629	-91.4391	-97.68	-97.8758
geasgeasgesb	-96.8151	-99.8556	-150.33	-135.45	-38.69	-57.61	-84.12	-84.94	-93.9	-94.1	-110.85	-106.36	-82.19	-94.6442	-96.46	-73.56	-102.888	-97.18	-89.98	-82.01	-100.165	-101.21	-88.77	-93.5466	-92.76	-77.31	-77.5465	-78.6442	-83.23	-83.2303	-96.37	-109.778	-109.69	-110.8	-64.24	-89.6929	-87.7	-87.44	-105.588	-105.28	-97.99	-104.33	-103.18	-105.23	-88.71	-89.8031	-91.2174	-97.41	-97.6107
geasgesbgebi	-97.3105	-98.7422	-186.99	-94.22	-59.04		-108.98	-83.74	-95.22	-93.76	-110.37	-107.48	-82.17	-94.7422	-96.61	-73.96	-104.478	-98.03	-88.25	-82.07	-100.534	-101.44	-88.65	-93.5097	-92.64	-75.56	-75.8056	-76.8811	-78.17	-78.1703	-95.49	-109.211	-109.01	-110.2	-64.64	-90.835	-88.44	-87.12	-105.652	-105.09	-97.09	-103.629	-102.34	-104.55	-87.06	-88.2329	-89.5492	-98.36	-98.5663
geassnasgep	-100.491	-102.616	-116.9	-52.86	-41.55	-82.37	-67.11	-86.88	-95.1	-96.52	-111.85	-107.24	-83.93	-96.3097	-98.05	-75.2	-104.009	-98.47	-93.21	-84.44	-102.418	-103.44	-91.7	-96.4289	-95.67	-84.95	-85.1812	-86.2907	-88.01	-88.0103	-98.04	-111.299	-111.21	-112.56	-65.79	-90.8954	-88.94	-89.8	-107.741	-107.46	-100.37	-106.612	-105.51	-107.59	-92.9	-93.9449	-95.41	-97.52	-97.7157
geassnasgesb	-103.994	-106.884	-153.62	-341.06	-63.3	-97.07	-93.26	-91.61	-100.74	-100.43	-116.92	-112.4	-87.37	-100.101	-101.88	-79	-109.453	-103.17	-96.16	-87.72	-106.369	-107.23	-94.91	-99.8258	-98.96	-84.74	-84.9804	-86.0885	-87.86	-87.8603	-101.39	-115.205	-114.98	-116.22	-69.92	-96.1487	-93.8	-93.03	-111.721	-111.16	-103.63	-110.204	-108.93	-111.12	-96.4	-97.5214	-98.9351	-101.13	-101.332
geassnsbpbbi	-97.1934	-90.3353	-234.34	-16.91	-128.79		-125.14	-80.28	-96.28	-91.95	-103.42	-98.44	-79.07	-92.313	-94.05	-71.92	-105.319	-97.24	-85.25	-79.39	-99.0575	-99.43	-86.13	-91.3033	-90.23	-74.97	-75.2366	-76.3071	-70.27	-70.2703	-89.17	-103.896	-103.28	-104.76	-61.65	-89.8358	-86.4	-83.04	-102.896	-101.62	-91.29	-98.3807	-96.76	-99.3	-87.52	-88.8078	-90.0471	-83.22	-83.4385
gebigebigeas	-96.2672	-95.3496	-179.89	-128.2	-56.57		-118.23	-82.08	-95.07	-92.94	-108.55	-106.25	-81.31	-93.8111	-95.69	-73.4	-104.152	-97.43	-86.26	-81.33	-99.7425	-100.59	-87.82	-92.6501	-91.76	-74.64	-74.8916	-75.9331	-75.54	-75.5403	-93.93	-107.651	-107.4	-108.7	-63.91	-90.192	-87.64	-86.07	-104.579	-103.92	-95.59	-102.133	-100.8	-103.11	-85.24	-86.4489	-87.6857	-97.93	-98.1405
gebigebigen	-106.346	-112.04	-99.12	-103.47	-46.52		-103.26	-97.21	-102.6	-101.97	-121.81	-113.34	-87.79	-99.8249	-102.53	-80.34	-108.864	-104.28	-99.81	-91.54	-109.044	-111.32	-98.9	-103.342	-102.82	-89.82	-90.0552	-91.0992	-93.05	-93.0502	-104.16	-117.086	-117.77	-119.71	-73.77	-98.6096	-97.98	-97.5	-114.954	-115.8	-108.82	-114.762	-113.92	-116.57	-97.09	-98.0418	-99.5422	-113.42	-113.621
gebigebigep	-97.3796	-96.4794	-264.8	-176.13	-67.86		-119.93	-81.65	-94.61	-93.51	-109.67	-106.6	-81.93	-94.2456	-96.17	-73.77	-103.658	-97.5	-86.65	-81.88	-99.9671	-100.98	-88.67	-93.4334	-92.61	-77.14	-77.3851	-78.4457	-78.49	-78.4903	-94.84	-108.285	-108.17	-109.48	-64.23	-89.8603	-87.68	-86.78	-104.937	-104.5	-96.63	-103.04	-101.81	-104.02	-84.69	-85.85	-87.1493	-97.87	-98.0758
gebigebigesb	-98.901	-99.0059	-222.23	-51.01	-83.13		-131.61	-83.28	-97.2	-93.88	-110.51	-109.85	-82.93	-95.5804	-97.46	-75.16	-106.825	-99.52	-87.48	-83.05	-101.751	-102.46	-89.4	-94.3192	-93.37	-75.24	-75.4969	-76.5401	-73.81	-73.8103	-95.42	-109.414	-109.05	-110.36	-65.94	-92.846	-89.94	-87.71	-106.551	-105.68	-97.02	-103.73	-102.3	-104.68	-86.34	-87.5911	-88.7935	-100.24	-100.453
gebisnbigesb	-100.951	-99.223	-256.98	-527.11	-102.68		-141.89	-83.52	-98.61	-94.95	-110.21	-110.27	-83.25	-96.1505	-98.03	-75.6	-108.261	-100.53	-88.05	-83.63	-102.778	-103.37	-89.95	-94.9989	-93.99	-76.75	-77.0125	-78.0662	-72.14	-72.1403	-95.19	-109.55	-109.1	-110.51	-66.12	-93.7058	-90.56	-88.04	-107.374	-106.32	-96.97	-103.894	-102.36	-104.86	-88.11	-89.379	-90.5959	-98.07	-98.2859
gengengeas	-115.903	-132.232	-37.52	-116.58	-54.92	-32.02	-71.6	-110.45	-110.16	-112.43	-133.88	-116.43	-96.93	-107.763	-110.03	-89.37	-113.089	-109.72	-114.13	-102.8	-118.081	-120.4	-111.54	-115.27	-115.01	-106.03	-106.232	-107.21	-115.5	-115.5	-117.01	-128.131	-128.88	-131.19	-85.5	-107.106	-106.83	-110.07	-125.044	-126.31	-124.2	-129.012	-128.57	-131.03	-111.16	-111.899	-113.394	-127.16	-127.334
gengengebi	-113.099	-123.23	-67.21	-117.49	-75	-37.26	-91.85	-106.23	-107.49	-108.73	-129.61	-113.32	-93.92	-104.787	-107.22	-86.75	-111.175	-107.7	-109.29	-99.65	-115.139	-117.51	-107.94	-111.758	-111.47	-100.13	-100.331	-101.314	-107.87	-107.87	-112.4	-123.72	-124.52	-127.11	-82.03	-103.936	-103.72	-106.28	-121.544	-122.78	-119.21	-124.202	-123.7	-126.36	-106.36	-107.157	-108.612	-123.15	-123.321
gengengep	-116.995	-135.453	-128.29	-137.64	-60.91	-29.2	-71.22	-110.78	-111.03	-113.53	-135.41	-117.31	-98.13	-108.812	-111.14	-90.38	-113.453	-110.44	-115.26	-103.98	-118.969	-121.44	-113	-116.666	-116.46	-108.79	-108.988	-109.979	-118.49	-118.49	-118.61	-129.505	-130.36	-132.54	-86.79	-107.947	-107.92	-111.44	-126.096	-127.55	-125.97	-130.666	-130.3	-132.62	-111.31	-112.019	-113.55	-128.65	-128.822
gengengesb	-114.199	-127.299	8.65	-14.98	-71.26	-39.35	-81.05	-108.42	-108.31	-109.97	-131.93	-115.08	-95.22	-106.083	-108.43	-87.83	-111.948	-108.57	-111.68	-100.93	-116.353	-118.68	-109.32	-113.138	-112.86	-102.52	-102.719	-103.719	-110.97	-110.97	-114.36	-125.616	-126.39	-128.9	-83.45	-105.193	-104.97	-107.84	-123.015	-124.25	-121.22	-126.179	-125.7	-128.26	-108.76	-109.526	-111.029	-123.89	-124.059
gengepgeas	-109.608	-120.934	-144.24	-173.11	-43.04	-33.6	-74.76	-101.81	-103.81	-106.79	-126.69	-115.03	-92.45	-103.782	-105.9	-84.11	-109.204	-105.48	-106.85	-95.96	-112.102	-114.07	-103.84	-107.94	-107.53	-99.53	-99.7462	-100.788	-107.61	-107.61	-110.59	-122.377	-122.92	-124.83	-78.09	-100.589	-100.02	-102.71	-118.637	-119.49	-115.42	-120.725	-120.09	-122.33	-103.51	-104.333	-105.875	-116.06	-116.247
gengepsip	-140.628	-155.976	467.05	-177.63	-72.44	-107.28	-98.18	-125.61	-128	-134.77	-154.61	-149.88	-121.16	-132.212	-133.96	-112.58	-136.389	-132.79	-136.07	-124.99	-140.616	-142.24	-133.83	-137.837	-137.41	-134.12	-134.33	-135.366	-139.71	-139.71	-141.14	-152.513	-152.86	-154.56	-108.15	-129.675	-128.92	-132.49	-147.863	-148.52	-147.07	-152.186	-151.56	-153.46	-134.94	-135.687	-137.261	-144.44	-144.623
gensnngep	-139.552	-167.017	-125.49	-41.87	-97.03	-79.26	-87.09	-133.24	-131.26	-133.66	-160.28	-141.74	-116.02	-127.042	-129.71	-108.8	-133.357	-130.1	-136.2	-122.37	-137.955	-140.69	-133.52	-137.351	-137.14	-129.79	-129.988	-131.024	-136.7	-136.7	-139.23	-150.641	-151.65	-153.57	-108.06	-130.275	-130.34	-130.87	-146.185	-147.76	-148.29	-153.264	-152.87	-155.2	-135.16	-135.902	-137.49	-151.12	-151.29
gepgepgeas	-97.9091	-101.534	-272.4	-242.52	-36.41	-45.92	-77.29	-84.84	-93.13	-96.17	-112.31	-105.89	-83.83	-95.6583	-97.45	-74.53	-101.16	-96.75	-92.08	-83.73	-100.756	-102.1	-90.95	-95.4428	-94.83	-85.18	-85.404	-86.5097	-92.06	-92.0603	-98.7	-111.187	-111.36	-112.57	-65.07	-88.5486	-87.32	-89.51	-106.428	-106.6	-100.67	-106.51	-105.63	-107.48	-88.8	-89.7583	-91.2765	-98.26	-98.4523
gepgepgebi	-98.152	-99.497	-315.6	-220.24	-59.53	-59.58	-103.58	-83.28	-93.73	-95.31	-111.72	-106.44	-83.23	-95.198	-97.09	-74.39	-102.16	-97.24	-89.66	-83.05	-100.433	-101.72	-90.22	-94.8168	-94.14	-82.17	-82.4015	-83.4973	-86.83	-86.8303	-97.26	-110.074	-110.19	-111.45	-64.91	-89.0866	-87.63	-88.48	-105.832	-105.85	-99.17	-105.23	-104.23	-106.2	-86.68	-87.7164	-89.1606	-98	-98.1968
gepgepgen	-110.365	-122.28	-231.34	-178.94	-51.84	-32.45	-76.61	-101.46	-104.06	-107.55	-127.48	-115.06	-93.21	-104.339	-106.37	-84.66	-108.975	-105.46	-107.33	-96.71	-112.488	-114.41	-104.78	-108.801	-108.42	-101.82	-102.032	-103.078	-109.99	-109.99	-111.59	-123.098	-123.63	-125.59	-78.68	-100.602	-100.07	-103.58	-119.119	-120	-116.54	-121.708	-121.13	-123.28	-103.05	-103.843	-105.4	-116.56	-116.744
gepgepgesb	-98.7976	-102.378	-313.33	-147.87	-57.82	-57.48	-92.15	-84.75	-93.86	-95.91	-113.19	-107.35	-83.91	-95.9036	-97.75	-74.79	-102.237	-97.55	-91.43	-83.69	-101.047	-102.35	-90.86	-95.4708	-94.81	-83.32	-83.5461	-84.67	-89.2	-89.2003	-98.55	-111.318	-111.46	-112.66	-65.46	-89.4707	-88.11	-89.38	-106.679	-106.75	-100.41	-106.446	-105.49	-107.37	-88.25	-89.2503	-90.7627	-98.12	-98.3131
gepsnaspbsb	-99.0603	-95.4593	-314.85	-418.97	-94.96	-126.6	-94.74	-84.38	-96.61	-94.48	-107.53	-99.64	-80.88	-93.7978	-95.47	-73.35	-104.794	-97.75	-89.15	-81.25	-100.238	-100.81	-88.8	-93.8175	-92.88	-80.79	-81.0394	-82.1518	-78.85	-78.8503	-92.22	-106.355	-105.92	-107.46	-63.46	-90.3546	-87.46	-85.43	-104.51	-103.6	-94.79	-101.549	-100.15	-102.49	-91.77	-92.95	-94.3191	-85.07	-85.2767
gepsnpgeas	-106.2	-110.299	-358.44	-312.82	-69.9	-92.18	-78.25	-91.49	-100.03	-102.25	-118.69	-112.3	-89.33	-101.521	-103.22	-80.45	-108.435	-103.27	-98.56	-89.82	-107.458	-108.53	-97.51	-102.165	-101.45	-91.64	-91.8663	-92.9857	-96.54	-96.5403	-104.11	-117.094	-117.05	-118.41	-71.59	-96.0719	-94.31	-95.49	-113.064	-112.9	-106.69	-112.795	-111.76	-113.74	-96.63	-97.6326	-99.137	-103.26	-103.452
gepsnpgen	-106.763	-115.777	-249.24	-219.76	-50.67	-76.33	-56.69	-93.84	-97.93	-100.45	-117.06	-109.35	-86.94	-98.7297	-100.72	-78.8	-105.14	-100.67	-101.05	-91.05	-107.841	-109.56	-98.88	-103.123	-102.65	-95.2	-95.4098	-96.49	-100.1	-100.1	-103.45	-115.738	-116.08	-118.01	-72.17	-95.796	-94.64	-97.08	-113.646	-114.22	-108.61	-114.122	-113.39	-115.67	-96.48	-97.3274	-98.8972	-108.3	-108.481
gesbgesbgeas	-97.8972	-101.997	-188.62	-83.72	-58.9	-69.51	-98.36	-85.26	-95.24	-94.46	-112.02	-108.55	-82.95	-95.5682	-97.4	-74.48	-104.705	-98.53	-90.07	-82.71	-101.188	-102.13	-89.34	-94.2233	-93.38	-76.4	-76.6399	-77.7476	-80.66	-80.6603	-96.91	-110.606	-110.44	-111.52	-65.35	-91.4031	-89.15	-88.04	-106.558	-106.08	-98.4	-104.927	-103.68	-105.79	-88.71	-89.848	-91.2388	-98.6	-98.8024
gesbgesbgebi	-99.5903	-102.255	-233.19	-29.61	-82.71		-122.53	-84.71	-97.16	-94.53	-112.22	-110.8	-83.65	-96.3796	-98.24	-75.59	-107.033	-100.03	-89.24	-83.6	-102.368	-103.14	-90.06	-95.0136	-94.08	-75.78	-76.0306	-77.1095	-76.26	-76.2603	-96.85	-110.853	-110.54	-111.73	-66.54	-93.367	-90.63	-88.58	-107.461	-106.69	-98.38	-105.093	-103.7	-105.98	-87.89	-89.1069	-90.3898	-100.58	-100.789
gesbgesbgen	-108.403	-118.892	-17.52	16.43	-62.83	-46.74	-90.19	-101.13	-103.61	-104.23	-125.91	-116.66	-90.37	-102.336	-104.91	-82.46	-110.135	-105.98	-104.34	-93.89	-111.189	-113.44	-101.25	-105.688	-105.2	-93.03	-93.2542	-94.3464	-98.7	-98.7002	-107.78	-120.504	-121.2	-122.97	-76.3	-100.603	-100.13	-100.31	-117.513	-118.43	-112.22	-118.079	-117.31	-119.75	-101.62	-102.52	-104.116	-114.38	-114.573
gesbgesbgep	-98.8395	-102.835	-272.38	-87.06	-68.9	-69.35	-100.83	-84.95	-94.86	-95.02	-113.05	-108.78	-83.61	-96.0112	-97.88	-74.9	-104.186	-98.58	-90.51	-83.32	-101.423	-102.52	-90.18	-94.9881	-94.21	-79.19	-79.4238	-80.5485	-83.6	-83.6003	-97.76	-111.148	-111.11	-112.22	-65.7	-91.0317	-89.14	-88.77	-106.888	-106.62	-99.37	-105.753	-104.61	-106.62	-88.21	-89.2986	-90.7483	-98.52	-98.718
gesbsnsbgeas	-100.05	-101.924	-254.75	27.48	-85.86	-101.96	-99.9	-84.81	-96.08	-94.94	-110.6	-108.58	-83	-95.8923	-97.71	-74.7	-106.017	-99.32	-90.62	-83.22	-102.182	-102.97	-89.82	-94.8381	-93.92	-78.04	-78.2836	-79.4024	-78.15	-78.1503	-96.21	-110.303	-110.01	-111.24	-65.33	-92.1484	-89.57	-88.18	-107.228	-106.52	-97.94	-104.691	-103.33	-105.58	-90.46	-91.626	-93.0184	-96.71	-96.9131
gesbsnsbgebi	-104.092	-105.627	-240.74	270.47	-103.28		-136.49	-88.36	-101.62	-98.66	-115.26	-113.61	-86.44	-99.4198	-101.27	-78.55	-110.97	-103.55	-92.65	-86.8	-106.023	-106.67	-93.34	-98.4214	-97.43	-80.67	-80.926	-82.0134	-78.59	-78.5903	-99.3	-113.667	-113.25	-114.54	-69.49	-96.9702	-94	-91.6	-110.981	-110.02	-101.17	-108.096	-106.6	-109	-92.65	-93.8863	-95.1783	-100.64	-100.851
in3n3	-122.165	-128.68	-168.92	-196.71	-80.65	-132.56	-116.47	-119.03	-125.19	-122.34	-139.46	-137.95	-98.11	-109.02	-111.29	-95.26	-119.713	-115.61	-117.42	-105.1	-120.384	-122.5	-116.55	-120.487	-120.26	-116.06	-116.535	-117.415	-112.01	-112.011	-107.49	-118.847	-119.5	-121.89	-90.62	-112.682	-111.78	-107.83	-122.883	-123.89	-119.01	-124.103	-123.64	-126.11	-115.55	-117.246	-117.988	-125.66	-126.055
in3o3	-134.168	-146.34	-144.69	-171.26	3.13	-128.67	-117.96	-135.11	-126.13	-132.73	-146.52	-148.29	-104.67	-113.218	-115.6	-102.6	-122.725	-119.43	-127.91	-112.71	-124.824	-127.12	-128.52	-131.44	-131.35	-130.15	-130.4	-131.12	-124.97	-124.97	-118.23	-127.253	-128.11	-132.03	-103.59	-121.573	-121.29	-117.04	-128.992	-130.25	-133.87	-137.763	-137.48	-140.65	-126.41	-127.566	-128.229	-142.81	-143.013
in3po3	-76.7568	-65.7621			-76.86	-134.88	-59.06	-61.16	-86.45	-73.53	-74.21	-82.05	-58.61	-73.946	-76.51	-52.66	-93.3908	-82.78	-65.3	-58.78	-81.7252	-82.5	-67.09	-72.8786	-71.63	-60.56	-60.9848	-61.9596	-56.97	-56.9704	-62.41	-79.7695	-79.19	-79.44	-39.58	-73.6161	-69.28	-59.92	-83.1526	-81.74	-66.96	-75.1346	-73.17	-75.75	-71.85	-73.6992	-74.5777	-73.86	-74.1949
in3s3	-95.0116	-96.261	-114.49	-199.58	-60.14	-134.15	-90.57	-90.36	-95.52	-92.73	-103.85	-101.42	-74.17	-87.297	-89.23	-69.63	-100.6	-93.99	-87.54	-77.38	-96.3126	-97.44	-88.28	-93.181	-92.43	-88.2	-88.5487	-89.6138	-83.94	-83.9404	-81.34	-95.4042	-95.27	-96.15	-62.04	-89.1832	-86.63	-79.65	-98.5118	-98.21	-89.8	-96.3125	-95.16	-97.15	-91.4	-93.0888	-94.0322	-95.8	-96.0793
in3se3	-88.2941	-85.9384	-51.3	-53.71	-32.51	-103.9	-53.52	-78.24	-92.05	-85.72	-90.61	-94.74	-68.98	-82.8652	-84.85	-63.99	-98.0612	-90.11	-80.32	-70.91	-91.2234	-92.06	-81.34	-86.5426	-85.58	-77.47	-77.8466	-78.8608	-74.97	-74.9704	-75.29	-90.4388	-90.05	-90.83	-54.53	-83.9106	-80.64	-72.94	-93.2896	-92.48	-82.48	-89.5332	-88.08	-90.32	-86.34	-88.1217	-88.979	-87.5	-87.7996
in3te3	-79.432	-72.1591	-8.53	-153.44	-53.58	-150.61	-69.8	-65.78	-87.65	-77.27	-78.79	-88.65	-61.47	-76.7534	-79.08	-55.6	-94.6739	-85.13	-70.02	-61.5	-84.1807	-84.95	-70.99	-76.8204	-75.65	-65.44	-65.8286	-66.9312	-62.13	-62.1304	-66.16	-83.1908	-82.67	-82.74	-43.54	-76.5748	-72.66	-63.03	-85.9101	-84.7	-71.32	-79.38	-77.57	-79.82	-78.42	-80.1853	-81.2702	-75.61	-75.917
inninninp	-114.241	-116.41	-159.53	-222.59	-94.68	-145.79	-125.66	-108.03	-118.95	-114.78	-129.77	-126.97	-93.5	-105.522	-107.66	-89.93	-117.295	-112.22	-107.97	-98.3	-115.33	-117.04	-108.12	-112.599	-112.15	-107	-107.471	-108.469	-102.84	-102.841	-100.76	-113.432	-113.76	-115.17	-83.17	-107.508	-105.99	-100.42	-117.293	-117.77	-109.6	-115.433	-114.69	-116.76	-109.37	-111.04	-112.006	-114.57	-114.969
inninpinas	-110.997	-109.047	-155.7	-214.04	-90.61	-156.16	-127.5	-100.62	-117.46	-110.61	-122.9	-121.14	-92.62	-105.851	-107.88	-88.44	-119.346	-113.01	-101.8	-95	-114.004	-115.27	-102.87	-107.938	-107.23	-100.26	-100.731	-101.823	-95.75	-95.7512	-98	-112.168	-112.13	-112.39	-79.85	-106.9	-104.61	-96.61	-115.56	-115.39	-103.78	-110.459	-109.35	-111.01	-107.87	-109.613	-110.684	-105.84	-106.241
inntlninp	-114.777	-112.759	-240.57	-51.43	-110.53	-125.71	-137.61	-109.44	-121.58	-116.45	-128.95	-122.57	-95.36	-107.159	-109.37	-92.26	-119.462	-114.36	-109.16	-99.6	-116.354	-118.11	-109.09	-113.501	-113.07	-107.79	-108.283	-109.238	-103.25	-103.251	-100.68	-113.186	-113.56	-115.24	-84.96	-109.035	-107.55	-101	-117.626	-118.11	-109.21	-114.985	-114.24	-116.47	-110.36	-112.076	-112.955	-111.89	-112.307
inoinsinse	-107.5	-111.769	-104.73	-141.48	-27.28	-127.7	-90.83	-104.27	-105.92	-105.09	-115.18	-117.89	-84.05	-95.8761	-98.17	-80.22	-108.484	-102.81	-101.29	-88.55	-105.6	-107.29	-101.19	-105.494	-104.95	-101.76	-102.079	-103.026	-97.21	-97.2104	-93.05	-105.743	-106.03	-107.91	-75.13	-99.9122	-98.17	-91.41	-108.381	-108.69	-103.78	-109.548	-108.65	-111.18	-103.96	-105.496	-106.34	-111.04	-111.298
inotloins	-119.168	-126.356	-176.4	-187.4	-2.48	-115.08	-126.37	-119.57	-115.54	-117.47	-130.39	-129.94	-93.01	-102.827	-105.29	-90.44	-113.932	-109.73	-113.57	-98.87	-112.915	-115.06	-113.1	-116.587	-116.33	-114.1	-114.4	-115.204	-108.69	-108.69	-103.66	-114.16	-114.87	-118.15	-88.72	-109.425	-108.65	-102.28	-116.222	-117.17	-116.74	-121.416	-120.9	-123.9	-113.74	-115.116	-115.804	-123.57	-123.812
inpinpinas	-119.969	-117.085	-157.23	-326.16	-99.67	-173.13	-144.15	-103.81	-127.08	-118.74	-131.38	-129.15	-103.36	-117.587	-119.42	-98.6	-132.154	-124.73	-106.41	-103.59	-124.124	-124.95	-109.75	-115.316	-114.39	-104	-104.499	-105.671	-100.89	-100.891	-108.23	-123.553	-123.16	-122.33	-89.14	-118.398	-115.3	-105.21	-125.735	-125.01	-111.19	-118.542	-117.16	-118.31	-116.54	-118.458	-119.528	-110.03	-110.446
inpinpinn	-111.561	-110.615	-150.99	-287.43	-102.85	-157.75	-136.06	-100.95	-117.52	-112.02	-125.65	-122.44	-93.49	-106.591	-108.57	-89.31	-119.505	-113.46	-102.38	-96.07	-114.792	-116.09	-104.09	-109.11	-108.44	-101.09	-101.563	-102.672	-97.41	-97.4112	-99.25	-113.194	-113.2	-113.49	-81	-107.583	-105.4	-97.83	-116.464	-116.39	-105.23	-111.799	-110.76	-112.34	-107.44	-109.169	-110.271	-108.01	-108.412
inpotlpobpo	-49.3995	-25.3316			-36.7	-91.41	-43.18	-34.35	-59.25	-44.55	-43.45	-44.11	-34.89	-50.1486	-53.4	-28.15	-67.817	-58.66	-37.34	-32.25	-54.86	-56.79	-38.47	-43.9985	-43.02	-30.83	-31.1949	-32.2359	-27.83	-27.8304	-35.35	-52.3446	-52.5	-52.39	-11.29	-44.991	-42.05	-32.32	-55.0527	-54.81	-36.63	-44.3928	-42.81	-45.28	-42.32	-43.9891	-45.0725	-37.02	-37.3169
inpotlpointe	-68.5253	-56.2539			-65.33	-124.3	-74.06	-54.84	-79.72	-66.48	-66.06	-70.72	-51.6	-66.7812	-69.34	-46.22	-86.3704	-76.1	-58.76	-51.08	-73.7841	-74.6	-59.72	-65.4822	-64.26	-53.36	-53.7948	-54.7725	-49.93	-49.9304	-54.26	-71.4288	-70.91	-71.35	-33.17	-66.7168	-62.58	-51.81	-74.8015	-73.48	-58.59	-66.7038	-64.79	-67.41	-65.96	-67.8272	-68.7003	-62.4	-62.7426
inptlpinn	-98.7106	-94.2995	-123.72	-376.42	-122.59	-143.47	-136.53	-89.99	-106.96	-99.9	-111.76	-101.58	-82.21	-95.247	-97.37	-78.43	-108.8	-102.76	-90.7	-84.19	-102.871	-104.3	-91.32	-96.3194	-95.67	-88.54	-89.0296	-90.1148	-84.17	-84.1712	-85.78	-99.7211	-99.81	-100.15	-69.34	-95.963	-93.89	-85.13	-103.748	-103.76	-90.72	-97.294	-96.27	-97.93	-95.13	-96.9071	-97.9521	-90.93	-91.3449
insbinbiinp	-123.114	-116.726	-144.76	-272.34	-108.98	-183.35	-150.57	-108.97	-135.64	-123.64	-132.22	-130.44	-108.31	-123.063	-125.02	-103.2	-139.952	-130.88	-111.78	-108.2	-129.845	-130.36	-113.39	-119.205	-118.06	-107.73	-108.232	-109.354	-103.66	-103.662	-112.35	-128.635	-127.98	-126.96	-93.02	-124.407	-120.43	-109.49	-131.287	-129.98	-114.31	-122.199	-120.46	-121.89	-122.48	-124.423	-125.423	-111.68	-112.095
inseinseins	-90.5062	-89.391	-70.46	-97.98	-40.27	-114.36	-66.18	-82.3	-93.14	-88.09	-94.97	-97.06	-70.7	-84.3373	-86.31	-65.86	-98.8897	-91.42	-82.78	-73.07	-92.9326	-93.88	-83.68	-88.787	-87.9	-81.12	-81.4863	-82.5205	-78	-78.0004	-77.31	-92.1017	-91.8	-92.61	-57.03	-85.6536	-82.65	-75.18	-95.0443	-94.42	-84.96	-91.8375	-90.49	-92.63	-88.04	-89.7906	-90.6811	-90.34	-90.6322
inseinseinte	-85.0218	-81.1271	-36.01	-76.05	-38.97	-119.32	-57.61	-74.12	-90.41	-82.88	-86.39	-92.57	-66.32	-80.6492	-82.74	-61.05	-96.6953	-88.26	-76.8	-67.62	-88.6887	-89.5	-77.71	-83.1197	-82.09	-73.41	-73.7901	-74.8353	-70.57	-70.5704	-72.02	-87.7674	-87.33	-87.88	-50.74	-81.2636	-77.8	-69.45	-90.6094	-89.67	-78.53	-85.9112	-84.34	-86.57	-83.55	-85.327	-86.2606	-83.51	-83.8119
insetlsebse	-46.1076	-31.9463	-52.26	21.91	16.51	-52.87	-26.2	-34.34	-49.64	-42.26	-43.47	-46.18	-32.31	-46.0944	-48.76	-26.08	-58.7317	-52.61	-35.56	-30.49	-50.4449	-52.52	-38.12	-43.0509	-42.38	-32.55	-32.8779	-33.9422	-31.62	-31.6203	-35.05	-49.7578	-50.16	-50.49	-11.53	-40.261	-38.67	-31.46	-51.2705	-51.75	-37.89	-44.5002	-43.46	-45.51	-41.42	-42.9357	-44.0841	-38.84	-39.1099
insetlseins	-80.1509	-76.4431	-80.19	-277.92	-31.66	-98.98	-74.91	-73.72	-84.45	-78.39	-84.17	-81.69	-61.47	-74.9541	-77.05	-57.04	-90.0411	-82.61	-73.65	-63.22	-82.9053	-83.95	-73.65	-78.7123	-77.84	-70.69	-71.0785	-72.0773	-67.05	-67.0504	-66.6	-81.2988	-81.08	-82.13	-47.77	-76.2425	-73.35	-64.79	-84.5072	-83.95	-73.66	-80.5096	-79.17	-81.47	-78.45	-80.2566	-81.069	-77.44	-77.7487
insetlseinte	-78.8586	-72.6197	-302.38	-395.38	-44.93	-109.17	-72.08	-69.31	-85.65	-77.17	-79.67	-83.04	-60.87	-74.9998	-77.19	-56.06	-91.5354	-83.15	-71.79	-61.74	-82.5589	-83.45	-71.77	-77.1213	-76.11	-67.56	-67.9646	-68.9679	-64.9	-64.9004	-65.43	-81.0297	-80.66	-81.51	-45.68	-75.9323	-72.56	-63.16	-84.099	-83.22	-71.59	-78.9231	-77.37	-79.76	-78.03	-79.859	-80.709	-74.33	-74.6505
insinsinse	-92.7995	-92.7477	-90.92	-146.49	-49.22	-124.58	-78.5	-86.29	-94.3	-90.45	-99.4	-99.3	-72.42	-85.8061	-87.76	-67.72	-99.7172	-92.7	-85.16	-75.22	-94.6241	-95.66	-86.01	-91.0173	-90.2	-84.68	-85.0368	-86.0884	-80.97	-80.9704	-79.33	-93.7615	-93.55	-94.4	-59.48	-87.359	-84.59	-77.42	-96.7902	-96.33	-87.41	-94.1083	-92.86	-94.93	-89.75	-91.4695	-92.3892	-93.02	-93.3053
insinsinte	-89.4702	-87.8372	-84.42	-183.69	-58.58	-139.67	-82.75	-82.13	-92.52	-87.29	-94.97	-97.29	-69.6	-83.4441	-85.52	-64.63	-98.1834	-90.74	-81.61	-71.8	-91.9777	-93.01	-82.28	-87.5037	-86.62	-80.67	-81.0293	-82.1185	-76.48	-76.4804	-75.93	-90.9682	-90.73	-91.33	-55.56	-84.5752	-81.65	-73.82	-94.0173	-93.45	-83.37	-90.4032	-89.05	-91.1	-86.91	-88.6234	-89.631	-88.94	-89.227
instlsbs	-44.8977	-33.358	34.26	-12.31	20.55	-69.11	-54.88	-37	-45.14	-41.26	-47.15	-44.81	-30.28	-43.3206	-45.6	-24.32	-53.7586	-48.61	-34.18	-29.65	-48.2427	-50.19	-37.55	-42.1858	-41.63	-34.14	-34.4482	-35.5246	-33.21	-33.2103	-33.83	-47.4438	-47.83	-48.49	-10.9	-37.2865	-35.98	-30.87	-49.2052	-49.82	-37.69	-43.7607	-42.92	-44.75	-38.09	-39.482	-40.6949	-39.59	-39.8455
instlsino	-94.1401	-95.7103	-122.64	-127.47	-50.96	-112.6	-100.5	-94.36	-93.45	-92.47	-102.78	-97.03	-71.94	-83.4158	-85.81	-68.4	-95.7579	-90.5	-89.76	-76.04	-92.5409	-94.41	-88.33	-92.5001	-92.04	-90.27	-90.5995	-91.5286	-84.12	-84.1204	-79.25	-91.5478	-91.98	-94.09	-62.73	-86.7574	-85.32	-78.27	-94.6831	-95.21	-89.33	-94.9089	-94.12	-96.7	-91.22	-92.7792	-93.5755	-95.19	-95.4549
instlsinse	-85.5836	-83.5325	-193.95	63.4	-61.04	-111.14	-91.81	-80.98	-88.73	-83.82	-91.78	-88.99	-66.18	-79.3631	-81.44	-61.86	-93.6942	-86.75	-79.38	-68.49	-87.642	-88.79	-79.11	-84.0593	-83.26	-77.97	-78.3505	-79.3637	-73.79	-73.7904	-71.87	-86.1529	-86.03	-87.13	-53.52	-81.1325	-78.49	-70.24	-89.3885	-89.01	-79.46	-86.111	-84.88	-87.09	-83.24	-85.0182	-85.8519	-83.48	-83.7831
inteinteins	-84.1843	-79.7257	-48.69	-167.59	-56.51	-145.09	-75.53	-73.96	-89.87	-82.1	-86.58	-92.92	-65.35	-79.9096	-82.11	-59.93	-96.1776	-87.76	-75.75	-66.48	-87.9017	-88.82	-76.46	-81.9939	-80.97	-73.05	-73.422	-74.5243	-69.2	-69.2004	-70.83	-86.8539	-86.49	-86.82	-49.38	-80.3542	-76.97	-68.25	-89.7819	-88.91	-77.15	-84.6994	-83.13	-85.26	-82.56	-84.3038	-85.3538	-82.23	-82.5258
inteinteinse	-82.1039	-76.4783	-21.33	-108.93	-46.14	-135.17	-62.78	-69.91	-88.96	-80.05	-82.5	-90.59	-63.8	-78.6129	-80.82	-58.22	-95.5812	-86.6	-73.38	-64.48	-86.364	-87.16	-74.27	-79.894	-78.79	-69.42	-69.8034	-70.8792	-66.3	-66.3004	-68.99	-85.3847	-84.9	-85.23	-47.01	-78.7923	-75.1	-66.16	-88.1892	-87.12	-74.84	-82.5643	-80.88	-83.12	-80.97	-82.7407	-83.7526	-79.5	-79.8038
intetltebte	-47.946	-28.9576	-78.98	-39.67	-7	-100.55	-51.06	-34.19	-56.49	-44.2	-44.33	-47.19	-34.45	-49.8466	-52.69	-27.43	-65.7598	-57.38	-37.26	-31.17	-53.7887	-55.53	-38.32	-43.9275	-42.97	-31.77	-32.106	-33.2558	-29.58	-29.5803	-35.99	-52.8208	-52.88	-52.59	-11.11	-44.1406	-41.36	-31.75	-54.38	-54.16	-37.45	-45.146	-43.66	-45.8	-44.71	-46.2726	-47.5738	-36.55	-36.8251
intetlteinpo	-71.2526	-60.1379			-67.46	-137.59	-80.25	-58.65	-81.66	-69.38	-69.26	-75.25	-54.09	-69.2223	-71.69	-48.71	-88.2068	-78.34	-62.49	-53.66	-76.2305	-77.04	-62.64	-68.409	-67.22	-57.56	-57.9825	-59.0017	-53.87	-53.8704	-57.1	-74.1222	-73.62	-74.03	-36.15	-69.2767	-65.29	-54.55	-77.3788	-76.13	-61.63	-69.6941	-67.84	-70.34	-70.32	-72.1632	-73.098	-63.68	-64.013
intetlteinse	-72.5216	-63.2704	-15.57	133.69	-43.52	-122.06	-75.55	-60.74	-80.18	-70.17	-71.22	-74.92	-54.37	-69.0513	-71.36	-49.26	-86.6311	-77.65	-63.84	-54.38	-76.1192	-76.99	-64.01	-69.5948	-68.5	-59.01	-59.4147	-60.4539	-55.28	-55.2804	-58.06	-74.3834	-73.96	-74.51	-37.65	-69.3084	-65.7	-55.5	-77.4143	-76.39	-63.33	-71.0343	-69.35	-71.73	-71.23	-73.0503	-73.9887	-65.92	-66.2399
pb3n3	-123.742	-143.941	-144.04	104.33	-78.48	-135.13	-107.18	-118.85	-115.83	-117.9	-135.86	-116.88	-97.76	-107.938	-111.2	-93.84	-118.857	-114.79	-119.22	-105.63	-120.216	-123.28	-117.76	-121.287	-121.15	-109.96	-110.162	-111.094	-107.04	-107.04	-115.75	-126.721	-127.95	-131.55	-93.67	-115.638	-115.56	-111.69	-126.174	-127.84	-126.46	-131.249	-130.86	-134.24	-117.38	-118.288	-119.531	-122.6	-122.769
pb3p3	-94.8753	-83.9811	-418.35	-148.83	-145.98	-153.15	-107.01	-80.45	-95.66	-89.34	-99.68	-85.82	-74.98	-87.7625	-89.14	-69.1	-100.581	-92.62	-83.49	-75.3	-94.0189	-94.14	-84.1	-89.0476	-88.07	-78.98	-79.2438	-80.33	-73.89	-73.8903	-82.85	-96.888	-96.13	-98.23	-59.09	-86.003	-82.27	-78.01	-96.8272	-95.49	-86.22	-92.9068	-91.43	-93.94	-88.01	-89.2689	-90.508	-66.83	-67.0478
pbnpbnpbp	-114.781	-125.927	-237.02	37.22	-135.57	-146.49	-110.71	-107.34	-110.06	-108.17	-123.94	-107.52	-90.42	-101.766	-104.75	-85.91	-113.84	-108.66	-108.81	-95.96	-112.337	-114.85	-107.11	-111.176	-110.82	-101.06	-101.283	-102.301	-96.42	-96.4203	-105.02	-117.324	-118.15	-120.84	-82.7	-107.03	-106.08	-100.89	-117.217	-118.23	-113.51	-119.029	-118.34	-121.35	-109	-110.01	-111.343	-105.15	-105.336
pbnpbnpbsb	-153.802	-181.813	-189.45	-642.24	-180.88	-202.19	-148.4	-150.12	-152.75	-148.2	-165.47	-157.3	-129.68	-142.015	-144.92	-126.68	-157.378	-151.53	-150.5	-134.44	-152.509	-154.73	-146.4	-150.893	-150.44	-145.94	-146.221	-147.278	-145.42	-145.42	-144.92	-158.431	-159.07	-158.41	-131.25	-157.503	-156.2	-139.82	-157.912	-158.57	-154.55	-160.698	-159.85	-161.48	-159.43	-160.39	-161.965	-158.06	-158.302
pbnsipgeas	-117.291	-124.788	6.95	0.83	-68.33	-73.55	-91.06	-108.95	-111.04	-111.3	-131.93	-116.37	-97.21	-109.226	-111.02	-89.36	-116.727	-111.47	-112.65	-99.99	-117.216	-118.53	-108.99	-113.343	-112.76	-106.92	-107.141	-108.199	-110.62	-110.62	-113.58	-126.227	-126.28	-128.05	-82.69	-106.984	-105.23	-106.08	-123.132	-123.26	-118.84	-124.547	-123.65	-125.85	-111.33	-112.191	-113.734	-113.67	-113.86
pbnsipgen	-158.245	-185.446	36.63	66.29	-122.39	-111.41	-129.53	-146.64	-148.81	-149.89	-176.51	-161.31	-133.9	-144.989	-147.03	-127.41	-152.216	-147.92	-153.49	-139.09	-154.793	-156.65	-151.54	-155.401	-155.04	-148.67	-148.872	-149.868	-154.96	-154.96	-157.06	-168.567	-169	-170.91	-128.07	-150.427	-149.4	-147.68	-163.122	-163.9	-166.54	-171.564	-170.97	-173.15	-156.08	-156.814	-158.334	-165.07	-165.243
pbppbppbn	-105.108	-106.507	-328.27	-46.46	-137.95	-152.56	-109.79	-94.75	-103.26	-98.39	-112.07	-97.46	-82.55	-94.8216	-97.17	-77.36	-107.588	-101.04	-97.03	-85.67	-103.508	-105.01	-95.74	-100.3	-99.66	-90.87	-91.1129	-92.1864	-85.4	-85.4003	-94.04	-107.429	-107.57	-109.73	-71.03	-97.1349	-94.91	-89.58	-107.434	-107.42	-100.11	-106.29	-105.23	-107.94	-99.32	-100.446	-101.786	-86.86	-87.062
pbpsingep	-93.3495	-91.4632	85.46	-36.53	-70.75	-95.15	-56.37	-81.69	-85.83	-87.18	-99.51	-87.61	-75.7	-87.8883	-89.57	-67.4	-94.6721	-89.4	-87.85	-78.53	-95.8933	-97.17	-85.57	-89.907	-89.33	-84.22	-84.4305	-85.5029	-87.16	-87.1602	-87.58	-100.27	-100.28	-101.83	-57.32	-81.8085	-79.95	-82.81	-99.9227	-100.06	-91.53	-97.1764	-96.31	-98.38	-81.27	-82.1171	-83.6803	-84.76	-84.9426
pbsbsibigen	-157.752	-174.74	130.21	-336.02	-158.48	-184.97	-164.21	-143.52	-149.54	-150.21	-171.96	-170.77	-134.43	-146.74	-148.96	-128.13	-157.493	-151.98	-149.95	-138.32	-156.293	-157.85	-148.73	-153.35	-152.68	-143.16	-143.394	-144.464	-146.22	-146.22	-153.63	-166.93	-167.14	-168.79	-126.47	-151.815	-150.29	-145.41	-163.381	-163.54	-161.01	-167.206	-166.16	-168.58	-153.66	-154.61	-156.139	-157	-157.199
si3as3	-118.016	-117.074	-154.84	-262.35	-39.74	-107.22	-35.71	-105.24	-99.77	-111.09	-126.01	-128.8	-101.01	-112.926	-114.34	-89.79	-116.524	-111.64	-112.99	-100.31	-117.472	-118.32	-107.57	-112.126	-111.41	-106.89	-107.111	-108.206	-107.72	-107.72	-116.3	-128.878	-128.72	-129.63	-78.23	-101.778	-100	-106.36	-123.423	-123.15	-118.22	-124.132	-123.13	-124.66	-106.92	-107.816	-109.373	-112.47	-112.663
si3bi3	-108.706	-107.809	-228.89	131.59	-89.33	-135.31	-84.85	-92.77	-97.62	-100.49	-117.75	-123.18	-91.14	-102.857	-104.31	-82.11	-111.21	-104.21	-96.08	-90.26	-107.521	-107.85	-96.43	-101.075	-100.16	-86.33	-86.5754	-87.5891	-82.97	-82.9703	-104.23	-117.171	-116.63	-118.41	-72.29	-97.0491	-93.98	-95.36	-112.754	-111.67	-105	-111.291	-109.92	-112.12	-92.26	-93.4557	-94.5904	-107.01	-107.216
si3n3	-165.085	-188.794	-161.05	-104.23	-29.01	-74.46	-58.36	-144.17	-148.69	-153.26	-175.74	-160.89	-141.06	-152.125	-154.66	-132.57	-154.811	-152.49	-159.48	-146.58	-161.687	-164.88	-157.83	-161.299	-161.22	-160.5	-160.687	-161.655	-168.75	-168.75	-162.35	-173.126	-174.29	-174.29	-128.61	-150.049	-150.75	-154.36	-168.845	-171.09	-171.18	-175.501	-175.34	-176.58	-156.76	-157.303	-158.971	-169.39	-169.555
si3p3	-126.045	-125.117	-516.94	165.02	-70.27	-108.64	-51.69	-111.73	-104.07	-119.3	-134.02	-136.05	-110.41	-121.698	-123.03	-98.3	-122.423	-118.72	-123.06	-109.65	-125.696	-126.74	-117.9	-122.211	-121.64	-126.64	-126.851	-127.96	-123.25	-123.25	-125.75	-137.439	-137.48	-138.39	-86.25	-107.808	-106.7	-115.79	-131.657	-131.77	-128.26	-133.728	-132.95	-134.2	-115.22	-115.988	-117.649	-119.59	-119.775
si3sb3	-114.532	-119.117	-331.29	-616.98	-83.98	-132.95	-55.57	-99.58	-100.19	-105.42	-124.6	-129.18	-96.35	-108.348	-109.77	-86.28	-114.824	-108.71	-104.99	-95.26	-112.795	-113.3	-101.72	-106.486	-105.62	-93.17	-93.3978	-94.5156	-92.79	-92.7903	-111.42	-124.444	-124.04	-125.36	-76.7	-101.284	-98.74	-101.2	-118.791	-118	-112.18	-118.505	-117.25	-119.1	-100.21	-101.292	-102.683	-110.43	-110.624
siasgeassip	-110.021	-110.008	334.7	-275.4	-48.59	-88.43	-59.3	-97.4	-95.89	-105.18	-120.79	-119.16	-94.16	-105.983	-107.54	-83.43	-109.862	-105.31	-104.91	-93.65	-110.659	-111.72	-100.9	-105.413	-104.75	-99.93	-100.151	-101.254	-102.04	-102.04	-109.22	-121.681	-121.68	-122.65	-72.26	-95.5726	-94.1	-99.59	-116.491	-116.44	-111.14	-116.986	-116.05	-117.63	-99.9	-100.801	-102.365	-106.33	-106.522
siasgeassisb	-112.394	-114.181	252.56	-95.75	-59.54	-107.34	-65.65	-98.98	-99.8	-106.83	-122.95	-123.88	-95.73	-107.814	-109.36	-85.77	-113.674	-108.31	-105.26	-95.12	-112.659	-113.5	-102.09	-106.765	-105.99	-95.48	-95.7063	-96.8091	-98.94	-98.9403	-110.68	-123.602	-123.42	-124.49	-75.73	-100.048	-98.07	-100.98	-118.488	-118.09	-112.3	-118.444	-117.34	-119.1	-101.36	-102.362	-103.836	-108.78	-108.974
siasgeassnas	-108.055	-109.456	104.97	-211.11	-54.2	-110.08	-58.64	-94.88	-99.33	-102.3	-117.95	-115.83	-90.53	-103.02	-104.62	-81.32	-110.474	-104.63	-100.9	-90.78	-108.952	-109.76	-98.01	-102.788	-101.97	-91.33	-91.5604	-92.663	-94.2	-94.2003	-104.88	-118.28	-118.04	-119.24	-71.49	-96.8425	-94.62	-96.28	-114.427	-113.93	-107.09	-113.408	-112.23	-114.21	-99.36	-100.397	-101.86	-103.18	-103.376
siassiassibi	-114.015	-112.508	-179.03	-149.59	-48.19	-113.24	-59.08	-99.9	-98.07	-106.81	-122.48	-125.3	-96.77	-108.633	-110.11	-86.27	-113.779	-108.36	-105.89	-95.81	-113.044	-113.79	-102.69	-107.297	-106.52	-97.72	-97.9465	-99.0256	-98.62	-98.6202	-111.36	-124.077	-123.85	-125.01	-75.23	-99.1484	-97.08	-101.58	-118.8	-118.32	-112.78	-118.845	-117.73	-119.46	-100.7	-101.692	-103.131	-109.61	-109.805
siassiassin	-139.182	-141.836	-138.79	-201.06	-36.33	-106.24	-48.9	-126.05	-122.03	-129.28	-148.14	-144.66	-119.15	-130.81	-132.24	-108.78	-133.879	-129.49	-134.81	-122.11	-138.621	-139.8	-129.13	-133.312	-132.75	-133.93	-134.146	-135.168	-135.38	-135.38	-136.24	-148.215	-148.22	-149.46	-99.27	-122.006	-120.58	-128.53	-144.756	-144.96	-140.41	-145.759	-144.96	-146.65	-128.85	-129.576	-131.181	-135.79	-135.978
siassiassip	-120.819	-119.628	-264.7	-128.77	-49.65	-109.37	-45.45	-107.41	-100.97	-113.91	-128.64	-131.18	-104.24	-115.978	-117.39	-92.67	-118.59	-114.13	-116.47	-103.52	-120.359	-121.3	-111.14	-115.623	-114.96	-113.94	-114.158	-115.26	-113.03	-113.03	-119.53	-131.843	-131.77	-132.65	-80.85	-103.784	-102.27	-109.59	-126.301	-126.18	-121.68	-127.455	-126.53	-127.96	-109.73	-110.576	-112.182	-114.87	-115.06
siassiassisb	-116.055	-116.172	-201.19	-394.51	-52.41	-115.69	-42.81	-102.59	-99.29	-108.73	-124.83	-127.71	-98.75	-110.671	-112.11	-87.92	-115.17	-109.98	-109.34	-97.8	-115.061	-115.82	-104.77	-109.402	-108.64	-101.12	-101.342	-102.449	-102.14	-102.14	-113.86	-126.565	-126.35	-127.41	-76.93	-100.732	-98.78	-103.79	-121.01	-120.59	-115.34	-121.395	-120.31	-121.94	-103.87	-104.825	-106.336	-110.65	-110.842
siassisbsibi	-112.84	-113.146	-238.41	-253.43	-65.56	-123.8	-65.5	-98.08	-98.31	-104.96	-122.03	-125.54	-95.22	-107.108	-108.58	-85.11	-113.225	-107.37	-103.3	-94.18	-111.529	-112.15	-100.81	-105.483	-104.66	-93.47	-93.6987	-94.7836	-93.66	-93.6603	-109.74	-122.601	-122.28	-123.6	-74.72	-98.993	-96.65	-99.91	-117.295	-116.64	-110.82	-117.017	-115.82	-117.66	-98.52	-99.5743	-100.954	-108.88	-109.076
sibigebisisb	-105.354	-106.035	178.03	450.46	-81.71		-95.29	-89.98	-96.67	-98.3	-115.82	-118.48	-88.36	-100.457	-102.07	-79.51	-109.375	-102.5	-93.93	-87.68	-105.497	-106.02	-94.01	-98.7781	-97.87	-82.84	-83.0849	-84.1352	-80.57	-80.5703	-101.67	-114.993	-114.56	-116.06	-69.85	-95.3043	-92.44	-92.82	-110.759	-109.84	-102.67	-109.115	-107.75	-109.93	-90.96	-92.1495	-93.369	-104.67	-104.875
sibisibisias	-110.741	-109.302	-205.9	-7.11	-65.26		-78.34	-95.46	-97.21	-103.07	-119.62	-123.2	-93.28	-105.08	-106.58	-83.53	-111.84	-105.72	-99.92	-92.27	-109.541	-110.11	-98.8	-103.438	-102.6	-90.53	-90.7639	-91.8168	-90.16	-90.1603	-107.17	-120.011	-119.65	-121.11	-73.08	-97.4164	-94.92	-97.73	-115.065	-114.32	-108.23	-114.423	-113.19	-115.14	-95.47	-96.5642	-97.861	-107.69	-107.889
sibisibisin	-129.758	-127.909	-144.26	64.82	-52.66		-63.4	-114.55	-113.82	-118.52	-138.76	-134.97	-108.62	-120.394	-122.45	-99.2	-126.147	-121.54	-119.24	-111.47	-128.45	-130.1	-117.44	-121.793	-121.21	-115.34	-115.564	-116.598	-116.18	-116.18	-124.19	-136.652	-136.95	-138.55	-89.51	-113.237	-112.15	-117.27	-134.133	-134.54	-127.51	-133.238	-132.36	-134.45	-114.08	-114.914	-116.469	-127.68	-127.872
sibisibisip	-113.598	-111.722	-323.8	119.23	-75.48		-84.56	-96.95	-97.61	-105.1	-122.12	-125.05	-96.06	-107.681	-109.21	-86	-113.457	-107.9	-102.55	-95	-111.96	-112.68	-101.81	-106.386	-105.61	-96.33	-96.5584	-97.6274	-95.34	-95.3403	-110.05	-122.626	-122.4	-123.8	-75.34	-99.0165	-96.9	-100.54	-117.541	-117.01	-111.28	-117.347	-116.21	-118.03	-97.42	-98.4604	-99.8239	-109.26	-109.455
sibisibisisb	-110.792	-111.675	-275.27	-91.26	-86.62		-81.38	-95.06	-98.51	-102.19	-120.11	-125.19	-92.95	-104.783	-106.24	-83.55	-112.518	-105.82	-99.06	-91.97	-109.357	-109.76	-98.27	-102.962	-102.06	-88.54	-88.7788	-89.8295	-86.32	-86.3203	-106.73	-119.722	-119.23	-120.84	-73.77	-98.5182	-95.64	-97.37	-114.864	-113.89	-107.5	-113.811	-112.48	-114.57	-94.89	-96.047	-97.2719	-108.35	-108.551
singensip	-158.736	-176.13	522.74	-122.95	-65.04	-113.17	-93.24	-142.1	-145.14	-149.52	-170.92	-162.46	-137.23	-148.378	-149.77	-128.77	-152.095	-147.98	-154.58	-142.27	-157.787	-159.16	-152.41	-156.182	-155.78	-154.89	-155.085	-156.053	-160.14	-160.14	-158.2	-169.397	-169.5	-170.92	-124.99	-146.675	-145.33	-150.01	-165.102	-165.62	-165.99	-170.758	-170.16	-171.91	-153.65	-154.29	-155.84	-163.64	-163.809
singensnn	-147.735	-177.605	273.25	-165.67	-60.63	-100.1	-61.5	-136.13	-133.01	-137.72	-162.57	-144.52	-120.78	-131.321	-134.48	-113.87	-136.588	-134.45	-142.28	-128.97	-143.639	-147.29	-140.36	-143.792	-143.81	-136.34	-136.522	-137.509	-145.71	-145.71	-144.36	-155	-156.55	-158.08	-113.67	-134.801	-135.98	-137.4	-151.649	-154.18	-154.97	-159.372	-159.28	-161.43	-139.14	-139.758	-141.37	-157.51	-157.669
singepsnas	-108.035	-111.279	86.33	-55.83	-30.31	-97.8	-47.15	-95.53	-97.23	-99.49	-115	-109.24	-88.19	-100.317	-102.07	-79.38	-106.437	-101.45	-102.54	-91.94	-109.23	-110.62	-98.84	-103.182	-102.62	-97.64	-97.8522	-98.9228	-100.35	-100.35	-103.08	-115.705	-115.8	-117.49	-70.56	-94.8436	-93.22	-97.35	-114.399	-114.65	-107.46	-113.105	-112.26	-114.41	-96.25	-97.0789	-98.6659	-105.3	-105.484
sinsinsias	-149.615	-157.191	-147.58	-152.75	-33.3	-97.34	-53.78	-133.39	-133.72	-138.7	-158.69	-148.55	-128.15	-139.895	-140.95	-118.52	-142.999	-138.1	-144.57	-132.47	-148.812	-149.74	-141.18	-145.108	-144.58	-145.78	-145.976	-146.945	-149.44	-149.44	-146.54	-158.294	-158.05	-159.19	-110.65	-133.502	-131.44	-139.23	-155.098	-155.17	-152.91	-157.877	-157.13	-158.75	-140	-140.638	-142.206	-149.7	-149.87
sinsinsibi	-141.248	-141.782	-142.97	-7.7	-42.3	-93.2	-52.64	-123.93	-124.11	-129.19	-149.44	-137.88	-119.67	-131.142	-132.39	-110.24	-134.821	-130.05	-132.76	-123.77	-139.913	-140.94	-131.4	-135.342	-134.82	-132.58	-132.769	-133.738	-136.15	-136.15	-136.79	-148.459	-148.33	-150.05	-101.24	-123.772	-121.94	-130.04	-145.82	-145.93	-142.36	-147.414	-146.64	-148.54	-128.18	-128.872	-130.379	-141.32	-141.482
sinsinsip	-152.86	-163.267	-284.69	-0.52	-39.91	-91.88	-53.6	-135.9	-137.42	-142.25	-162.52	-152.43	-131.84	-143.549	-144.67	-122.07	-146.107	-141.53	-148.6	-136.03	-152.228	-153.34	-145.37	-149.261	-148.78	-151.69	-151.885	-152.868	-155.04	-155.04	-150.52	-162.149	-162.02	-162.87	-114.57	-137.193	-135.39	-142.93	-158.614	-158.9	-157.17	-162.054	-161.38	-162.82	-143.69	-144.303	-145.914	-153.43	-153.6
sinsinsisb	-144.017	-146.97	-100.78	-219.21	-47.66	-106.47	-43.29	-127.9	-126.99	-132.45	-153.09	-142.11	-122.77	-134.311	-135.44	-113.18	-137.597	-132.82	-137.55	-126.9	-143.074	-144.01	-134.86	-138.822	-138.29	-137.85	-138.038	-139.021	-140.84	-140.84	-140.3	-151.974	-151.78	-153.37	-104.56	-127.069	-125.15	-133.33	-149.112	-149.16	-146.09	-151.134	-150.36	-152.17	-133.19	-133.853	-135.405	-143.2	-143.362
sinsipsias	-141.512	-144.904	-264.92	-56.75	-43.67	-105.16	-54.17	-127.52	-123.83	-131.8	-150.61	-146.79	-121.89	-133.421	-134.67	-111.31	-135.762	-131.43	-137.63	-124.75	-140.999	-142.03	-132.31	-136.432	-135.88	-139.15	-139.363	-140.384	-139.95	-139.95	-139.14	-150.902	-150.82	-152.08	-101.87	-124.16	-122.63	-131.25	-147.182	-147.31	-143.58	-148.814	-148.04	-149.63	-131.12	-131.817	-133.43	-138.19	-138.375
sinsnpgesb	-132.03	-143.071	42.06	-162.51	-89.27	-117.67	-98.75	-123.92	-122.95	-124.15	-148.13	-136.12	-110.75	-122.878	-124.84	-102.17	-129.698	-124.83	-127.34	-114.32	-131.733	-133.28	-123	-127.448	-126.87	-121.7	-121.915	-123.012	-125.54	-125.54	-128.83	-141.601	-141.81	-143.42	-96.04	-120.422	-119.05	-121.05	-138.305	-138.64	-134.21	-140.035	-139.16	-141.33	-123.64	-124.481	-126.108	-131.44	-131.624
sipgeassnsb	-106.584	-107.176	52.91	89.32	-69.96	-116.41	-75.66	-91.61	-96.67	-100.49	-115.84	-114.22	-88.66	-101.017	-102.69	-79.34	-108.255	-102.62	-98.08	-88.74	-106.741	-107.64	-95.85	-100.642	-99.85	-90.41	-90.6378	-91.7672	-90.45	-90.4503	-102.6	-115.897	-115.74	-117.01	-69.3	-94.3637	-92.31	-94.1	-112.103	-111.69	-104.6	-110.935	-109.78	-111.74	-96.56	-97.596	-99.0892	-100.57	-100.763
sipgepsias	-116.425	-117.857	180.59	24.61	-52.13	-102.04	-60.23	-102.57	-100.97	-110.74	-126.49	-126.19	-100.95	-112.57	-114.07	-90.06	-115.613	-111.42	-111.81	-100.51	-117.153	-118.25	-108.04	-112.469	-111.85	-109.45	-109.667	-110.773	-111.25	-111.25	-116.22	-128.383	-128.42	-129.44	-79.32	-101.972	-100.68	-106.54	-123.043	-123.09	-118.36	-124.054	-123.19	-124.71	-105.52	-106.376	-107.972	-112.13	-112.319
sipgepsin	-114.427	-116.429	277.16	50.85	-40.46	-66	-43.4	-105.09	-102.43	-107.68	-126.34	-115.22	-97.2	-108.708	-110.12	-86.58	-110.968	-106.82	-112	-99.92	-116.102	-117.36	-106.98	-111.065	-110.57	-112.31	-112.52	-113.557	-115.54	-115.54	-113.2	-124.917	-124.98	-126.45	-76.07	-98.3784	-97.05	-105.94	-121.788	-122.13	-117	-122.184	-121.48	-123.21	-102.37	-103.074	-104.699	-113.39	-113.574
sipgepsnp	-113.051	-115.82	-83.06	-6.83	-69.76	-113.67	-66.45	-97.38	-101.34	-106.88	-123.2	-118.73	-95.17	-107.093	-108.62	-85.3	-112.018	-107.28	-105.58	-95.53	-112.668	-113.67	-103.37	-107.924	-107.26	-103.18	-103.396	-104.53	-104.86	-104.86	-110.17	-122.746	-122.7	-124.01	-75.57	-99.1214	-97.49	-101.34	-118.37	-118.26	-112.8	-118.703	-117.76	-119.5	-101.87	-102.782	-104.366	-106.95	-107.135
sipsingen	-158.725	-176.135	522.74	-122.98	-65.04	-113.18	-93.24	-142.1	-145.14	-149.52	-170.93	-162.46	-137.23	-148.378	-149.77	-128.77	-152.095	-147.98	-154.59	-142.27	-157.787	-159.16	-152.42	-156.192	-155.79	-154.9	-155.095	-156.063	-160.15	-160.15	-158.2	-169.397	-169.5	-170.93	-124.99	-146.675	-145.33	-150.01	-165.102	-165.62	-166	-170.768	-170.17	-171.92	-153.65	-154.29	-155.84	-163.64	-163.809
sipsipsias	-123.472	-122.429	-385.79	12.5	-59.55	-109.89	-50.94	-109.57	-102.45	-116.63	-131.4	-133.65	-107.39	-118.896	-120.28	-95.55	-120.55	-116.5	-119.75	-106.63	-123.065	-124.07	-114.53	-118.927	-118.31	-120.32	-120.535	-121.641	-118.23	-118.23	-122.68	-134.674	-134.67	-135.56	-83.61	-105.835	-104.55	-112.73	-129.012	-129.02	-124.98	-130.6	-129.75	-131.08	-112.45	-113.257	-114.893	-117.21	-117.398
sipsipsibi	-119.665	-117.503	-419.16	130.67	-69.69	-113.62	-72.65	-103.84	-99.94	-111.76	-127.61	-129.74	-102.94	-114.428	-115.94	-91.77	-117.586	-113.16	-112.22	-101.85	-118.423	-119.41	-109.33	-113.795	-113.14	-110.71	-110.928	-112.03	-109.06	-109.06	-117.59	-129.758	-129.74	-130.83	-80.24	-102.86	-101.43	-107.7	-124.208	-124.1	-119.36	-125.154	-124.22	-125.71	-105.78	-106.674	-108.22	-113.84	-114.029
sipsipsin	-143.72	-147.781	-399.24	95.78	-52.89	-101.63	-53.81	-129.05	-125.83	-134.34	-153.02	-148.88	-124.74	-136.143	-137.2	-113.94	-137.754	-133.45	-140.45	-127.45	-143.434	-144.3	-135.47	-139.532	-138.98	-144.34	-144.549	-145.569	-144.47	-144.47	-142.02	-153.572	-153.39	-154.66	-104.49	-126.344	-124.67	-133.98	-149.617	-149.64	-146.65	-151.771	-151.01	-152.51	-133.53	-134.2	-135.817	-140.57	-140.753
sipsipsisb	-121.421	-120.548	-441.04	-59.19	-75.34	-120.88	-57.95	-106.58	-101.15	-113.67	-129.72	-131.94	-104.88	-116.417	-117.86	-93.36	-118.898	-114.65	-115.63	-103.8	-120.379	-121.36	-111.38	-115.864	-115.22	-114.39	-114.604	-115.729	-112.35	-112.35	-119.92	-132.066	-132.05	-133.06	-81.77	-104.26	-102.9	-109.82	-126.305	-126.23	-121.75	-127.526	-126.62	-128.03	-109.02	-109.876	-111.489	-114.78	-114.966
sisbgesbsias	-105.704	-108.473	266.71	-594.19	-57.69	-101.74	-61.14	-92.77	-95.17	-99.16	-117.41	-117.72	-89.21	-101.378	-102.97	-79.4	-108.051	-102.29	-97.91	-88.38	-106.128	-106.9	-94.81	-99.5725	-98.76	-86.14	-86.369	-87.4841	-88.04	-88.0403	-103.79	-116.924	-116.69	-117.84	-69.33	-94.1147	-91.92	-94.09	-111.86	-111.33	-104.75	-111.054	-109.87	-111.72	-93.94	-95.0023	-96.4357	-102.93	-103.125
sisbgesbsibi	-109.32	-112.412	78.09	-779.09	-94.78		-91.44	-94.16	-99.74	-101.7	-120.03	-123.28	-91.97	-104.185	-105.75	-82.82	-112.518	-105.9	-98.81	-91.35	-109.289	-109.84	-97.66	-102.468	-101.57	-86.68	-86.9183	-88.0014	-86.65	-86.6503	-105.99	-119.354	-118.94	-120.28	-73.5	-98.9322	-96.2	-96.78	-114.808	-113.95	-106.98	-113.436	-112.11	-114.17	-95.06	-96.2115	-97.5118	-107.28	-107.481
sisbsisbsias	-114.734	-116.826	-260.38	-513.63	-67.25	-124.23	-49.93	-100.6	-99.35	-106.74	-124.32	-127.77	-97.09	-109.035	-110.48	-86.65	-114.497	-108.9	-106.52	-96.02	-113.401	-114.05	-102.72	-107.421	-106.61	-96.36	-96.584	-97.6985	-97.04	-97.0403	-112.16	-125.01	-124.72	-125.91	-76.35	-100.494	-98.29	-101.98	-119.371	-118.78	-113.25	-119.441	-118.28	-120.01	-101.5	-102.518	-103.973	-109.89	-110.082
sisbsisbsibi	-112.695	-115.475	-308.81	-344.83	-84.58	-134.83	-70.22	-97.35	-99.37	-103.84	-122.4	-127.22	-94.69	-106.612	-108.06	-84.95	-113.723	-107.32	-102.06	-93.65	-111.122	-111.58	-100.04	-104.771	-103.89	-90.85	-91.083	-92.1682	-89.61	-89.6103	-109.13	-122.145	-121.7	-123.16	-75.27	-99.9497	-97.25	-99.33	-116.883	-116.01	-109.91	-116.231	-114.94	-116.9	-97.57	-98.689	-99.9989	-109.47	-109.668
sisbsisbsin	-134.101	-135.738	-128.69	-385.06	-62.54	-122.44	-45.07	-120.66	-116.98	-123.06	-144.22	-140.84	-113.4	-125.174	-127.07	-103.42	-129.657	-125.39	-126.85	-116.17	-133.04	-134.62	-122.37	-126.734	-126.17	-123.1	-123.316	-124.391	-123.72	-123.72	-129.91	-142.238	-142.51	-143.93	-93.95	-117.265	-116.26	-122.36	-139.064	-139.5	-133.29	-138.955	-138.13	-140.02	-121.57	-122.348	-123.999	-130.27	-130.456
sisbsisbsip	-117.374	-118.928	-381.78	-319	-79.46	-128.05	-60.61	-102.32	-99.9	-108.81	-126.79	-129.57	-99.91	-111.649	-113.11	-89.17	-116.101	-111.06	-109.22	-98.79	-115.815	-116.6	-105.74	-110.37	-109.63	-102.5	-102.719	-103.847	-102.22	-102.22	-114.96	-127.515	-127.34	-128.5	-78.63	-102.061	-100.21	-104.78	-121.791	-121.41	-116.19	-122.243	-121.18	-122.79	-103.61	-104.576	-106.091	-111.4	-111.589
sn3as3	-114.007	-116.426	-105.48	-155.49	-97.93	-172.7	-59.03	-97.86	-107.37	-105.8	-121.62	-119.75	-92.67	-105.83	-107.43	-84.78	-116.837	-109.45	-104.26	-94.55	-113.886	-114.33	-102.22	-107.315	-106.32	-95.34	-95.5892	-96.7024	-91.91	-91.9103	-106.42	-120.816	-120.27	-121.82	-76.17	-103.619	-100.45	-99.57	-118.995	-117.93	-109.75	-116.615	-115.15	-117.56	-107.23	-108.423	-109.79	-104.97	-105.177
sn3bi3	-108.934	-103.463	-192.08	71.75	-129.98	-189.4	-161.49	-87.89	-106.34	-100.91	-113.59	-115.26	-87.56	-100.811	-102.67	-80.42	-115.084	-106.22	-92.51	-88.9	-108.758	-109.03	-94.99	-100.244	-99.09	-84.56	-84.8435	-85.8749	-73.31	-73.3103	-98.38	-113.379	-112.68	-114.43	-70.74	-99.5792	-95.77	-92.76	-112.921	-111.4	-100.73	-108.049	-106.28	-109.1	-95.04	-96.4082	-97.5335	-97.29	-97.5194
sn3n3	-159.018	-198.803	-2.14	-227.09	-72.04	-156.72	-42.8	-148.84	-139.55	-146.97	-174.89	-161.73	-125.79	-136.267	-139.82	-120.22	-144.593	-141.82	-151.13	-136.28	-151.138	-154.86	-149.13	-152.697	-152.7	-142.4	-142.58	-143.604	-144.85	-144.85	-152.05	-163.052	-164.7	-167.28	-124.02	-145.896	-146.85	-145.54	-160.176	-162.58	-165.03	-169.756	-169.58	-172.44	-149.51	-150.261	-151.796	-171.07	-171.224
sn3p3	-119.391	-124.948	-174.99	52.2	-88.08	-177.74	-53.97	-101.76	-110.13	-110.28	-128.04	-121.89	-96.41	-109.198	-110.81	-88.1	-118.269	-111.85	-108.36	-98.57	-117.139	-117.86	-106.85	-111.772	-110.94	-104.82	-105.052	-106.219	-101.9	-101.9	-111.22	-125	-124.67	-126.25	-80.14	-106.324	-103.7	-104.05	-122.616	-121.98	-114.98	-121.505	-120.27	-122.45	-109.58	-110.655	-112.171	-109.5	-109.694
sn3sb3	-112.175	-113.331	-213.18	-240.68	-146.94	-190.55	-129.1	-93.68	-107.17	-104.12	-119.32	-119.43	-90.55	-103.957	-105.74	-82.75	-116.649	-108.61	-99.1	-91.66	-111.618	-112	-98.46	-103.807	-102.71	-88.74	-89.0005	-90.1406	-80.54	-80.5403	-103.19	-118.158	-117.56	-119.06	-73.75	-102.224	-98.84	-96.29	-116.483	-115.19	-105.63	-112.948	-111.3	-113.83	-101.65	-102.926	-104.272	-100.16	-100.373
snaspbassnp	-106.058	-104.122	-310.13	29.19	-105.93	-164.8	-74.41	-90.72	-102.33	-99.56	-113.18	-106.18	-85.98	-99.041	-100.55	-78.75	-110.671	-103.07	-96.27	-87.32	-106.495	-106.81	-95.31	-100.364	-99.37	-89.26	-89.5133	-90.6186	-85.03	-85.0303	-97.64	-111.945	-111.31	-113.04	-69.51	-96.8252	-93.45	-91.52	-110.786	-109.62	-100.95	-107.767	-106.29	-108.73	-100.24	-101.454	-102.781	-90.72	-90.9299
snaspbsbsibi	-113.202	-108.847	-305.72	-723.21	-133.33		-117.74	-98.41	-109.51	-107.72	-120.7	-118.74	-93.87	-106.895	-108.44	-86.22	-118.782	-110.88	-102.08	-94.16	-113.476	-113.7	-101.46	-106.567	-105.5	-93.31	-93.5704	-94.6409	-90.93	-90.9303	-105.28	-119.717	-119.03	-120.53	-76.59	-104.109	-100.65	-98.4	-117.889	-116.54	-107.76	-114.734	-113.13	-115.53	-103.33	-104.561	-105.83	-97.75	-97.9643
snassnassnbi	-111.81	-111.293	-132.04	-82.52	-111.82	-182.77	-103.55	-94.37	-106.64	-104.14	-118.61	-117.66	-90.59	-103.76	-105.49	-82.93	-115.754	-108.06	-100.07	-92.24	-111.737	-112.19	-99.43	-104.584	-103.55	-90.98	-91.2392	-92.3313	-85.26	-85.2603	-103.32	-117.894	-117.35	-118.97	-73.88	-101.69	-98.46	-96.86	-116.521	-115.38	-106.31	-113.33	-111.78	-114.33	-102.79	-104.041	-105.338	-101.96	-102.174
snassnassnn	-132.742	-149.784	-35.71	-178.94	-96.52	-171.59	-60.3	-119.79	-122.53	-121.16	-142.88	-140.01	-106.24	-119.151	-121.5	-99.16	-130.098	-123.9	-125.1	-111.72	-130.452	-132.08	-121.2	-125.953	-125.28	-117.15	-117.377	-118.502	-113.71	-113.71	-124.75	-138.66	-138.85	-140.46	-95.24	-122.212	-120.24	-118.34	-137.023	-137.16	-131.74	-138.116	-137.05	-139.59	-126.45	-127.465	-129.014	-131.78	-131.971
snassnassnp	-115.874	-119.091	-121.67	-94.62	-96.62	-175.35	-58.49	-99.21	-108.2	-107.26	-123.74	-120.5	-93.99	-107.008	-108.59	-85.94	-117.313	-110.26	-105.69	-95.95	-115.008	-115.52	-103.81	-108.845	-107.9	-98.74	-98.9831	-100.113	-95.34	-95.3403	-108.04	-122.212	-121.73	-123.32	-77.51	-104.482	-101.48	-101.1	-120.218	-119.28	-111.49	-118.238	-116.85	-119.19	-108.1	-109.252	-110.668	-106.51	-106.712
snassnassnsb	-112.994	-114.615	-131.12	-192.23	-113.48	-179.32	-83.67	-96.34	-107.05	-105.23	-120.51	-119.18	-91.7	-104.908	-106.59	-83.84	-116.4	-108.91	-102.35	-93.32	-112.818	-113.28	-100.69	-105.865	-104.85	-92.92	-93.1722	-94.2964	-87.92	-87.9203	-105	-119.549	-119.02	-120.58	-75.01	-102.698	-99.54	-98.18	-117.818	-116.72	-108.02	-115.029	-113.51	-115.97	-105.16	-106.379	-107.744	-102.95	-103.159
snassnsbsnbi	-111.203	-110.253	-163.08	-129.33	-127.56	-189.48	-125.1	-92.88	-106.58	-103.51	-117.79	-117.6	-89.85	-103.11	-104.89	-82.23	-115.698	-107.74	-98.27	-91.27	-110.98	-111.4	-98.15	-103.387	-102.31	-88.91	-89.173	-90.273	-81.46	-81.4603	-102.23	-117.003	-116.43	-118.03	-73.05	-101.233	-97.89	-95.76	-115.682	-114.45	-104.93	-112.102	-110.49	-113.07	-100.91	-102.189	-103.477	-100.35	-100.566
snbisnbisnas	-109.853	-106.781	-160.02	-10.42	-119.01	-188.72	-137.4	-90.87	-106.19	-102.36	-115.77	-115.98	-88.76	-101.979	-103.79	-81.34	-115.078	-106.87	-95.95	-90.23	-109.926	-110.32	-96.87	-102.082	-100.99	-87.28	-87.5501	-88.6161	-78.91	-78.9103	-100.5	-115.294	-114.7	-116.37	-71.91	-100.225	-96.76	-94.46	-114.391	-113.09	-103.16	-110.34	-108.68	-111.36	-98.55	-99.8609	-101.078	-99.3	-99.5208
snbisnbisnn	-127.216	-137.241	-73.79	-36.66	-109.95	-177.06	-118.25	-112.01	-119.16	-115.35	-135.71	-135.43	-100.36	-113.386	-115.78	-93.64	-126.207	-119.15	-116.23	-105.59	-124.779	-126.14	-114.19	-119.105	-118.3	-107.82	-108.062	-109.15	-99.83	-99.8303	-117.11	-131.469	-131.49	-133.66	-88.8	-116.566	-114.14	-111.52	-130.814	-130.54	-123.58	-130.31	-129.03	-132	-116.67	-117.77	-119.216	-125.47	-125.672
snbisnbisnp	-111.667	-108.93	-185.93	39.25	-119.01	-188.13	-133.22	-91.93	-106.42	-103.38	-117.64	-116.63	-89.81	-102.847	-104.68	-82.24	-115.16	-107.44	-97.14	-91.32	-110.697	-111.2	-98.2	-103.35	-102.32	-90.34	-90.6024	-91.6889	-82.08	-82.0803	-101.84	-116.37	-115.88	-117.61	-72.92	-100.621	-97.45	-95.69	-115.279	-114.15	-104.64	-111.695	-110.13	-112.73	-99.22	-100.487	-101.76	-100.46	-100.675
snbisnbisnsb	-110.043	-106.855	-198.11	-69.08	-137.92	-197.14	-158.07	-89.88	-106.58	-101.99	-115.51	-116.76	-88.58	-101.877	-103.71	-81.23	-115.622	-107.05	-94.72	-89.81	-109.696	-110.01	-96.14	-101.424	-100.29	-85.88	-86.1562	-87.2235	-75.71	-75.7103	-99.98	-114.962	-114.3	-115.95	-71.8	-100.501	-96.85	-93.92	-114.086	-112.65	-102.34	-109.657	-107.93	-110.65	-97.28	-98.6195	-99.816	-98.27	-98.4942
snnpbnsnp	-143.701	-171.897	-288.52	97.24	-116.74	-157.11	-86.2	-132.95	-131.77	-133.43	-157.2	-147.2	-115.25	-126.731	-129.8	-109.6	-136.958	-132.56	-136.58	-122.49	-138.961	-141.76	-134.31	-138.399	-138.11	-128.95	-129.157	-130.231	-128.17	-128.17	-136.65	-148.918	-149.93	-152.11	-109.94	-134.057	-133.66	-130.08	-146.43	-147.81	-146.69	-152.159	-151.6	-154.29	-137.17	-138.068	-139.587	-147.61	-147.785
snnsnnsnas	-146.261	-174.367	-6.16	-200.09	-96.37	-168.69	-54.51	-134.93	-132.32	-134.49	-158.63	-151.12	-116.61	-128.55	-131.75	-110.31	-138.53	-134.21	-138.92	-124.68	-141.812	-144.81	-135.7	-139.919	-139.62	-131.19	-131.396	-132.495	-129.65	-129.65	-138.45	-151.152	-152.26	-154.02	-109.85	-134.818	-134.6	-132.39	-149.371	-150.9	-148.43	-154.061	-153.49	-156.1	-138.81	-139.686	-141.294	-151.41	-151.585
snnsnnsnbi	-143.058	-164.963	-29.45	-116.71	-131.05	-177.54	-91.13	-130.97	-130.92	-131.01	-154.23	-147.04	-113.57	-125.696	-128.74	-107.46	-136.713	-131.72	-134.47	-121.45	-138.996	-141.63	-131.92	-136.263	-135.86	-126.11	-126.325	-127.408	-122.49	-122.49	-133.88	-146.929	-147.8	-149.96	-105.94	-131.512	-130.77	-128.55	-146.016	-147.14	-143.47	-149.33	-148.6	-151.45	-133.83	-134.745	-136.309	-146.83	-147.011
snnsnnsnp	-147.829	-177.655	-35.15	-122.54	-90.9	-168.06	-50.42	-136.06	-132.8	-135.94	-160.81	-151.67	-117.79	-129.477	-132.73	-111.39	-138.723	-134.84	-140	-125.88	-142.579	-145.73	-137.17	-141.294	-141.06	-133.5	-133.7	-134.81	-132.66	-132.66	-140.1	-152.47	-153.7	-155.46	-111.35	-135.65	-135.72	-133.79	-150.314	-152.04	-150.23	-155.703	-155.23	-157.75	-139.27	-140.115	-141.749	-153.08	-153.25
snnsnnsnsb	-144.249	-169.019	34.6	-175.85	-117.26	-176.99	-70.72	-132.92	-131.55	-132.39	-156.23	-149.05	-114.75	-126.867	-129.92	-108.47	-137.416	-132.63	-136.61	-122.62	-140.094	-142.8	-133.27	-137.612	-137.24	-128.52	-128.729	-129.839	-125.25	-125.25	-135.71	-148.69	-149.61	-151.62	-107.36	-132.781	-132.16	-129.99	-147.36	-148.58	-145.36	-151.184	-150.5	-153.25	-136.35	-137.239	-138.857	-147.86	-148.036
snnsnpsnas	-134.323	-152.95	-59.86	-111.92	-94.01	-173.43	-58.04	-120.83	-123.37	-122.8	-144.93	-140.51	-107.44	-120.195	-122.68	-100.23	-130.491	-124.81	-126.18	-112.94	-131.375	-133.27	-122.66	-127.345	-126.75	-119.77	-119.992	-121.138	-116.75	-116.75	-126.28	-139.955	-140.33	-141.81	-96.55	-123.054	-121.49	-119.71	-138.065	-138.49	-133.4	-139.65	-138.7	-141.11	-126.93	-127.911	-129.513	-133.14	-133.327
snppbpsnas	-148.461	-159.858	-153.8	-148.67	-86.76	-189	-117.42	-138.68	-146.76	-144.61	-159.6	-152.48	-128.38	-142.137	-143.6	-121.38	-154.299	-146.99	-139.66	-129.13	-149.32	-149.67	-138.33	-143.672	-142.68	-142.96	-143.253	-144.424	-144.95	-144.95	-140.7	-155.659	-155.06	-154	-117.89	-146.046	-142.9	-133.78	-154.034	-152.93	-145.11	-152.259	-150.79	-151.91	-152.06	-153.283	-154.791	-145.08	-145.325
snppbpsnn	-118.076	-129.404	-43.61	169.74	-118.11	-172.11	-63.12	-105.54	-110.14	-108.18	-126.83	-116.22	-92.93	-105.599	-108.1	-86.22	-116.414	-110.6	-109.72	-97.6	-115.89	-117.78	-107.1	-111.735	-111.16	-104.11	-104.333	-105.474	-100.83	-100.83	-108.45	-122.046	-122.42	-123.96	-80.88	-107.331	-105.69	-103.09	-121.297	-121.72	-114.85	-121.044	-120.11	-122.53	-109.71	-110.719	-112.276	-108.85	-109.037
snpsnpsnas	-117.585	-121.978	-145.43	-27.11	-93.16	-176.95	-56.44	-100.51	-109.12	-108.76	-125.9	-121.24	-95.21	-108.099	-109.68	-87.04	-117.775	-111.04	-107.03	-97.25	-116.046	-116.65	-105.33	-110.306	-109.42	-101.81	-102.048	-103.195	-98.65	-98.6503	-109.63	-123.592	-123.18	-124.77	-78.86	-105.404	-102.58	-102.57	-121.395	-120.6	-113.23	-119.862	-118.55	-120.81	-108.85	-109.964	-111.427	-107.99	-108.188
snpsnpsnbi	-115.444	-116.218	-182.25	27.28	-109.77	-185.71	-100.67	-96.99	-107.86	-106.78	-122.73	-119.06	-93.05	-105.892	-107.61	-85.09	-116.411	-109.51	-102.8	-94.82	-113.709	-114.34	-102.42	-107.446	-106.52	-97.45	-97.6963	-98.8239	-91.91	-91.9103	-106.36	-120.441	-120.06	-121.78	-76.37	-103.094	-100.3	-99.71	-118.709	-117.86	-109.61	-116.382	-115	-117.39	-104.5	-105.666	-107.065	-104.73	-104.934
snpsnpsnn	-135.903	-155.801	-87.65	-35.45	-90.45	-174.3	-54.66	-121.81	-124.15	-124.34	-146.74	-140.69	-108.62	-121.214	-123.86	-101.29	-130.867	-125.71	-127.15	-114.19	-132.315	-134.5	-124.03	-128.643	-128.13	-122.3	-122.516	-123.684	-119.68	-119.68	-127.68	-141.113	-141.69	-143.04	-97.74	-123.776	-122.64	-121.05	-139.065	-139.81	-134.9	-141.022	-140.19	-142.47	-127.35	-128.299	-129.951	-134.35	-134.532
snpsnpsnsb	-116.553	-119.608	-179.75	-26.33	-109.18	-185.24	-79.43	-98.89	-108.35	-107.88	-124.63	-120.5	-94.09	-106.966	-108.63	-85.94	-116.997	-110.25	-104.99	-95.85	-114.725	-115.35	-103.65	-108.694	-107.78	-99.31	-99.55	-100.708	-94.55	-94.5503	-108.02	-122.07	-121.68	-123.36	-77.5	-104.11	-101.36	-101	-119.961	-119.14	-111.32	-118.075	-116.72	-119.04	-106.77	-107.906	-109.368	-105.68	-105.88
snsbpbsbsnbi	-106.618	-100.206	-310.78	-1018.19	-170.95	-181.92	-143.62	-88.14	-105.39	-99.76	-111.3	-109.92	-85.8	-99.3005	-101	-78.86	-113.733	-104.84	-92.9	-86.66	-106.859	-106.97	-93.31	-98.6777	-97.49	-84.26	-84.5396	-85.6183	-74.76	-74.7604	-95.86	-111.07	-110.26	-111.88	-69.04	-98.1197	-94.19	-90.24	-110.726	-109.08	-98.3	-105.732	-103.93	-106.63	-96.54	-97.8983	-99.0995	-87.63	-87.8568
snsbsnsbsnas	-112.3	-113.583	-166.71	-220.59	-129.57	-185.1	-106.95	-94.91	-106.95	-104.62	-119.72	-119.07	-90.96	-104.256	-106	-83.12	-116.309	-108.59	-100.57	-92.31	-112.023	-112.46	-99.38	-104.641	-103.58	-90.66	-90.9159	-92.0494	-84.07	-84.0703	-103.89	-118.636	-118.09	-119.62	-74.17	-102.212	-98.98	-97.04	-116.942	-115.76	-106.6	-113.762	-112.18	-114.68	-103.27	-104.517	-105.875	-101.32	-101.531
snsbsnsbsnbi	-111.127	-110.08	-204.72	-165.65	-144.91	-195.71	-146.62	-91.79	-106.89	-103.07	-117.42	-118.1	-89.58	-102.939	-104.75	-82	-116.163	-107.86	-96.92	-90.74	-110.674	-111.03	-97.3	-102.617	-101.5	-87.3	-87.568	-88.6724	-78.12	-78.1203	-101.59	-116.572	-115.95	-117.51	-72.77	-101.371	-97.86	-95.11	-115.302	-113.94	-103.98	-111.3	-109.61	-112.24	-99.47	-100.778	-102.05	-99.25	-99.4683
snsbsnsbsnn	-129.992	-144.418	-7.36	-171.35	-125.23	-182.17	-97.34	-116.48	-120.71	-118.31	-140.05	-139.07	-103.16	-116.214	-118.5	-96.08	-128.049	-121.36	-121.22	-108.31	-127.431	-128.8	-117.27	-122.206	-121.44	-112.24	-112.47	-113.615	-105.56	-105.56	-120.99	-135.249	-135.28	-137.27	-91.77	-119.241	-116.94	-114.68	-133.856	-133.66	-127.49	-134.171	-132.96	-135.72	-122.11	-123.154	-124.713	-127.53	-127.723
snsbsnsbsnp	-114.008	-115.746	-191.17	-121.54	-128.22	-188.6	-104.18	-96.06	-107.25	-105.71	-121.57	-119.64	-92.03	-105.125	-106.87	-84.05	-116.382	-109.12	-101.77	-93.42	-112.777	-113.32	-100.71	-105.901	-104.9	-93.82	-94.0693	-95.2208	-87.32	-87.3203	-105.22	-119.68	-119.22	-120.81	-75.27	-102.673	-99.7	-98.28	-117.801	-116.79	-108.04	-115.066	-113.58	-116	-104	-105.205	-106.613	-102.48	-102.686
tl3o3	-110.301	-111.129	506.06	-158.66	33.87	-55.51	-130.73	-111.59	-105.71	-109	-117.68	-102.82	-83.34	-91.4266	-94.2	-81.51	-101.33	-98.38	-106.09	-89.11	-100.657	-103.32	-103.84	-106.661	-106.65	-105.14	-105.447	-106.098	-97.81	-97.8104	-92.51	-101.221	-102.38	-107.22	-79.89	-97.2854	-97.47	-91.98	-103.449	-105	-105.96	-109.79	-109.58	-113.22	-103.24	-104.564	-105.032	-109.91	-110.155
tl3po3	-52.8177	-33.1263			-72.49	-91.45	-81.98	-41.93	-68.08	-51.87	-48.15	-46.25	-37.68	-52.5343	-55.26	-33.34	-73.7509	-63.07	-45.18	-36.08	-58.4362	-59.27	-44.24	-49.8837	-48.65	-39.69	-40.1852	-41.0309	-35.41	-35.4105	-37.11	-54.1347	-53.64	-54.75	-19.49	-52.8861	-48.65	-35.6	-58.325	-56.93	-40.52	-48.5871	-46.61	-49.69	-52.26	-54.2348	-54.8881	-38.26	-38.6503
tl3s3	-68.268	-62.0808	179.84	-205.03	-33.22	-86.74	-115.58	-69.56	-73.71	-67.45	-75.65	-63.02	-50.26	-62.8426	-65.17	-46.81	-77.4628	-71.08	-64.64	-51.73	-69.9992	-71.49	-62.1	-66.8452	-66.17	-61.88	-62.2999	-63.2558	-55.08	-55.0804	-53.31	-66.9987	-67.15	-68.79	-38.18	-64.6841	-62.54	-52.5	-70.7879	-70.76	-60.07	-66.4647	-65.38	-67.82	-66.92	-68.7741	-69.4833	-61	-61.3331
tl3se3	-62.1618	-52.1403	-100.19	-117.85	-24.48	-69.46	-90.78	-56.97	-70.64	-61.57	-62.72	-56.45	-46.06	-59.403	-61.73	-42.33	-76.0485	-68.27	-57.94	-46.19	-65.8403	-66.97	-56.19	-61.2384	-60.34	-52.04	-52.4884	-53.3869	-47.94	-47.9405	-48.09	-62.8624	-62.71	-64.26	-31.94	-60.6349	-57.71	-46.64	-66.4174	-65.82	-53.69	-60.6264	-59.22	-61.91	-62.11	-64.0474	-64.672	-53.29	-53.6442
tl3te3	-54.8228	-39.38	-301.17	-353.51	-42.89	-110.4	-112.28	-45.29	-68.09	-54.52	-51.89	-51.18	-39.62	-54.4033	-56.97	-35.22	-73.9929	-64.48	-48.6	-37.88	-59.9539	-60.89	-47.09	-52.7749	-51.63	-42.55	-43.0049	-43.9875	-38	-38.0005	-40.06	-56.7501	-56.37	-57.27	-22.36	-54.7561	-51.04	-37.83	-60.1911	-59.08	-43.9	-51.8552	-50.06	-52.77	-56.78	-58.6847	-59.54	-40.71	-41.0682
tlntlntlas	-94.8703	-80.4297	297.62	-140.17	-109.09	-96.78	-142.06	-92.07	-106.13	-97.1	-102.77	-83.08	-77.68	-89.3683	-91.89	-75.23	-103.126	-97.88	-90.72	-80.47	-97.2365	-99.2	-88.07	-92.4574	-92.02	-88.97	-89.4969	-90.3828	-80.99	-80.9911	-77.5	-90.0881	-90.6	-92.62	-65.24	-89.5603	-88.24	-79.77	-96.4888	-97.06	-83.77	-89.6125	-88.84	-91.43	-91.6	-93.3907	-94.1496	-80.29	-80.7339
tlntlntlp	-92.8642	-81.4415	255.45	-123.49	-109.22	-93.82	-136.73	-90.26	-103.22	-95.75	-103.91	-83.32	-75.7	-87.2966	-89.81	-73.24	-100.56	-95.6	-89.01	-78.64	-95.1873	-97.22	-86.68	-91.0327	-90.65	-85.97	-86.497	-87.4048	-79.35	-79.351	-76.65	-89.0634	-89.64	-91.7	-63.87	-87.8377	-86.65	-78.4	-94.8691	-95.57	-83.19	-88.9457	-88.25	-90.75	-88.39	-90.1894	-90.9653	-80.75	-81.1939
tlotlstlse	-82.1405	-79.1923	154.32	-84.54	-10.77	-77.6	-116.74	-81.88	-83.77	-80.08	-87.26	-78.65	-60.78	-72.0987	-74.81	-57.77	-85.7442	-80.35	-78.78	-63.36	-79.7864	-81.87	-75.61	-79.7712	-79.31	-75.45	-75.8313	-76.6845	-69.26	-69.2604	-66.26	-78.6045	-79.19	-81.93	-51.73	-75.9195	-74.63	-65.02	-81.451	-82.07	-75.34	-81.0008	-80.18	-83.2	-79.92	-81.6308	-82.2435	-77.81	-78.1145
tlpobpoalpo	-54.7372	-30.6464			-52.9	-80.72	-43.4	-39.05	-63.8	-50.72	-50.42	-48.09	-42.53	-57.7569	-60.95	-34.58	-73.5121	-64.77	-42.09	-40.05	-62.4998	-64.52	-44.98	-50.4531	-49.52	-37.19	-37.5344	-38.6046	-34.63	-34.6303	-43.34	-60.1476	-60.36	-59.36	-16.71	-50.0557	-47.31	-40.3	-62.802	-62.72	-43.95	-51.5706	-50.08	-51.99	-45.22	-46.7857	-47.9839	-42.12	-42.403
tlptlptlbi	-133.658	-133.195	-74.55	-414.57	-173.58	-208.11	-221.67	-127.52	-148.31	-137.74	-145.63	-132.55	-119.76	-133.135	-134.96	-117.06	-149.758	-142.8	-126.63	-119.09	-138.802	-139.4	-125.23	-130.777	-129.82	-125.01	-125.635	-126.663	-122.87	-122.871	-121.89	-136.713	-136.35	-133.71	-113.28	-140.689	-137.99	-119.81	-139.764	-138.81	-124.96	-132.405	-130.94	-131.27	-137.57	-139.65	-140.505	-124.54	-125.065
tlsbsals	-53.0993	-42.7552	-2.41	32.7	11.75	-54.39	-57.45	-43.44	-54.69	-51.95	-56.68	-51.26	-42.37	-55.5092	-57.61	-35.25	-64.0837	-59.22	-43.01	-41.81	-60.413	-62.31	-48.24	-52.8484	-52.31	-45.88	-46.1683	-47.2619	-46.25	-46.2503	-46.14	-59.6692	-60.01	-59.59	-20.75	-46.9143	-45.67	-43.13	-61.3903	-62.05	-49.01	-54.9703	-54.17	-55.37	-46.52	-47.7754	-49.1263	-48.6	-48.8432
tlsebsealse	-53.5716	-39.9672	-88.49	96.55	0.68	-43.33	-27.98	-40.76	-57.9	-51.7	-52.77	-51.74	-42.7	-56.5712	-59.14	-35.25	-67.3304	-61.57	-42.68	-41.06	-61.0163	-63.14	-47.17	-52.0718	-51.43	-42.43	-42.7364	-43.8275	-42.49	-42.4903	-45.76	-60.3819	-60.81	-60.09	-19.61	-48.1458	-46.71	-42.17	-61.9	-62.5	-47.7	-54.2002	-53.23	-54.65	-47.99	-49.3732	-50.6684	-46.54	-46.7959
tlsetlsetls	-64.1231	-55.4531	-14.21	-103.93	-28.01	-75.6	-99.27	-61.15	-71.56	-63.52	-66.97	-58.7	-47.42	-60.5045	-62.84	-43.8	-76.4644	-69.19	-60.17	-47.99	-67.1725	-68.43	-58.13	-63.0775	-62.25	-55.27	-55.7089	-56.628	-50.26	-50.2604	-49.8	-64.203	-64.16	-65.72	-34.03	-61.9695	-59.33	-48.55	-67.8231	-67.43	-55.79	-62.5439	-61.25	-63.84	-63.66	-65.5711	-66.2247	-55.88	-56.2273
tlstlstlse	-66.2788	-58.8359	78.42	-106.93	-30.96	-81.54	-107.63	-65.26	-72.65	-65.48	-71.37	-60.97	-48.83	-61.6771	-64.01	-45.29	-76.971	-70.15	-62.39	-49.88	-68.6244	-70	-60.11	-64.9605	-64.21	-58.62	-59.0486	-59.9883	-52.72	-52.7204	-51.59	-65.6484	-65.7	-67.31	-36.08	-63.3244	-60.94	-50.56	-69.3582	-69.15	-57.97	-64.549	-63.36	-65.88	-65.31	-67.1928	-67.877	-58.46	-58.7996
tlstlstlte	-63.4196	-54.1484	14.09	-236.63	-36.3	-95.02	-112.46	-61.24	-71.45	-62.73	-67.1	-59.15	-46.29	-59.6121	-62.03	-42.54	-75.8072	-68.52	-59.07	-46.74	-66.2826	-67.62	-56.71	-61.7812	-60.96	-55.3	-55.7269	-56.7051	-49.12	-49.1204	-48.44	-63.1224	-63.12	-64.51	-32.54	-60.941	-58.35	-47.22	-66.8703	-66.52	-54.27	-61.1904	-59.89	-62.4	-63.25	-65.1235	-65.8949	-54.07	-54.4086
tltebtealte	-53.9997	-34.9812	-85.04	-9.09	-23.93	-86.22	-62.9	-39.6	-62.29	-51.55	-52.26	-52.02	-43.09	-58.4968	-61.25	-34.88	-72.5296	-64.52	-42.67	-40	-62.517	-64.3	-45.78	-51.3425	-50.43	-39.53	-39.8467	-41.022	-37.88	-37.8803	-44.92	-61.6007	-61.68	-60.49	-17.5	-50.2226	-47.59	-40.73	-63.1844	-63.08	-45.66	-53.2261	-51.82	-53.38	-48.82	-50.2756	-51.6938	-42.63	-42.8922
tltetltetls	-58.8072	-46.5238	-146.4	-284.44	-39.44	-102.79	-111.42	-53.15	-69.52	-58.4	-59.15	-55.17	-42.71	-56.7578	-59.26	-38.65	-74.608	-66.28	-53.71	-42.06	-62.859	-64.01	-51.67	-57.0538	-56.08	-48.78	-49.2183	-50.2056	-43.38	-43.3805	-43.98	-59.6553	-59.48	-60.61	-27.27	-57.6214	-54.51	-42.27	-63.2669	-62.55	-48.83	-56.2695	-54.73	-57.33	-59.87	-61.766	-62.5799	-47.33	-47.6767
DIFFERENCE		HF-D4	PM6-D3H4X	PM7	GFN0-xTB	GFN1-xTB	GFN2-xTB	B97M-V-C	B97-3c	r2SCAN-3c	PBEh-3c	wB97X-3c	PBE	PBE-D3BJ	PBE-D4	BP86	BP86-D3BJ	BP86-D4	B97M-V	TPSS	TPSS-D3BJ	TPSS-D4	r2SCAN	r2SCAN-D3BJ	r2SCAN-D4	M06-L	M06-L-D3(0)	M06-L-D4	MN15-L	MN15-L-D3(0)	PBE0	PBE0-D3BJ	PBE0-D4	PBE0-NL	B3LYP	B3LYP-D3BJ	B3LYP-D4	TPSSh	TPSSh-D3BJ	TPSSh-D4	r2SCAN0	r2SCAN0-D3BJ	r2SCAN0-D4	r2SCAN0-NL	M06	M06-D3(0)	M06-D4	M06-2X	M06-2X-D3(0)
al3as3		1.76543	258.253	4.11322	52.7132	-4.37678	33.1532	16.0932	-8.76678	-1.10678	-11.6768	-7.84678	10.3132	-4.04472	-5.74678	18.5632	-14.1913	-7.38678	13.9232	10.4432	-10.1485	-11.0368	7.50322	1.99755	2.91322	12.0032	11.5718	10.3679	13.7432	13.742	4.74322	-10.4722	-10.1168	-7.01678	31.2032	2.23731	5.01322	8.40322	-12.0688	-11.5168	4.35322	-2.8232	-1.51678	-1.42678	10.0132	8.31906	7.05172	9.17322	8.8089
al3bi3		5.44193	-44.3461	114.714	-24.5561	-18.1261	-19.5761	4.1839	-18.9261	-7.5961	-12.7661	-12.3161	8.0439	-6.14874	-7.9161	16.2139	-19.5837	-10.2761	3.7939	8.1439	-12.7391	-12.9861	7.9739	2.4042	3.5939	8.6739	8.21209	7.16856	15.1739	15.1724	4.1439	-11.6013	-10.7861	-8.2461	28.2839	-2.1676	2.0439	6.7339	-14.3161	-12.7661	6.1739	-1.42097	0.3639	-0.2261	4.6739	2.89867	1.92997	7.6939	7.3091
al3n3		-12.3008	107.982	277.952	62.6222	47.3022	17.8822	10.4322	-7.06784	-6.70784	-24.2678	-1.92784	14.3722	3.12278	1.36216	19.7722	-2.96877	0.362164	5.79216	8.56216	-6.80448	-8.79784	0.0321641	-3.81796	-3.55784	2.59216	2.20512	1.28178	-1.46784	-1.46822	3.76216	-7.37847	-7.87784	-6.95784	25.9022	4.43434	5.05216	5.20216	-9.67525	-10.8278	-4.52784	-9.29932	-8.89784	-9.48784	8.24216	6.87218	5.85576	-2.50784	-2.83617
al3o3		-14.4107	53.5084	175.038	164.348	45.0884	27.4084	-2.17164	0.568365	-6.63164	-19.6516	5.76836	17.2784	8.55502	6.69836	20.9884	2.61182	5.30836	5.78836	9.22836	-2.79639	-4.91164	-0.411635	-3.18404	-3.07164	-0.0416352	-0.231335	-0.957455	-3.87164	-3.87183	5.63836	-3.04512	-3.72164	-4.35164	22.8484	5.50496	5.66836	5.69836	-5.91709	-7.24164	-5.35164	-8.87502	-8.65164	-9.95164	11.1084	10.3535	9.37339	-7.95164	-8.11678
al3p3		-0.0639296	-87.5875	-34.6975	40.2525	15.8625	15.7625	18.7625	-6.03748	-6.29748	-15.6775	-7.21748	7.62252	-6.6108	-8.08748	16.1625	-14.7804	-8.83748	13.3325	7.63252	-12.4875	-13.4075	3.25252	-2.18754	-1.37748	6.10252	5.68598	4.40346	8.56252	8.56143	1.64252	-13.1355	-12.8375	-9.60748	28.9825	1.13434	3.56252	5.40252	-14.4784	-14.1575	0.182524	-6.75291	-5.62748	-5.18748	9.24252	7.63619	6.20491	4.48252	4.12748
al3po3		12.4917			-11.1378	-3.06778	36.6022	17.8222	-7.28778	1.77222	0.622222	0.502222	11.1122	-4.48442	-6.97778	21.0822	-18.4277	-8.75778	12.6022	10.8822	-12.1141	-13.2078	5.83222	0.139042	1.27222	12.6122	12.2922	11.184	16.6822	16.6819	6.85222	-10.3309	-9.92778	-7.38778	38.0422	4.19161	8.01222	9.41222	-13.6453	-12.7178	4.06222	-3.80601	-2.06778	-3.02778	12.2722	10.7165	9.49216	4.88222	4.62299
al3s3		-1.00678	46.2191	-93.8209	46.4791	31.3091	32.2491	11.5091	-3.42085	-4.10085	-9.52085	0.0891498	9.89915	-3.69653	-5.22085	17.6791	-12.0524	-6.22085	8.19915	7.13915	-12.1134	-13.1909	0.82915	-4.02676	-3.30085	-0.0408502	-0.29728	-1.45065	0.13915	0.13886	3.49915	-10.5231	-10.3109	-8.22085	29.6091	2.65557	4.94915	5.07915	-13.8525	-13.7309	-1.46085	-7.71495	-6.68085	-6.98085	5.60915	4.37098	2.96061	0.96915	0.75204
al3se3		3.52835	61.6333	-13.0067	45.7033	42.9133	60.3833	14.8933	-5.31671	-0.836707	-4.07671	-0.646707	10.7133	-3.68926	-5.43671	19.3633	-13.745	-6.63671	9.98329	9.00329	-11.7126	-12.6967	2.95329	-2.21591	-1.31671	4.34329	4.07032	2.9362	5.61329	5.61298	4.65329	-10.5277	-10.1767	-7.98671	33.1233	3.67042	6.55329	6.98329	-13.5197	-13.0467	0.533293	-6.2849	-4.99671	-5.55671	5.54329	4.17711	2.8541	3.34329	3.11483
al3te3		8.97449	172.552	-7.21773	15.7723	1.68227	12.5523	15.9823	-8.20773	-1.21773	-1.95773	-3.99773	9.80227	-5.84576	-7.96773	19.5723	-18.3804	-9.64773	10.7723	9.83227	-13.0446	-13.9977	4.04227	-1.71722	-0.627728	8.01227	7.72144	6.50122	11.6423	11.6419	5.11227	-11.8258	-11.3677	-8.66773	35.7723	2.82502	6.37227	8.16227	-14.6765	-13.8177	2.14227	-5.6387	-4.01773	-4.64773	6.40227	4.95401	3.50839	5.65227	5.41422
alasalasalsb		1.95435	167.66	57.8397	30.1797	-19.7903	26.4397	14.2797	-11.3203	-3.05026	-12.1603	-7.91026	9.29974	-5.20097	-6.94026	17.6497	-16.0445	-8.77026	12.1897	9.68974	-11.2194	-12.0003	7.26974	1.66241	2.63974	11.7497	11.3186	10.1093	13.6897	13.6884	4.05974	-11.4409	-11.0003	-7.93026	30.3897	0.819742	3.86974	7.73974	-13.107	-12.3703	4.23974	-3.12833	-1.72026	-1.71026	9.00974	7.31941	6.03949	9.07974	8.71678
alasgaasalp		-0.218184	-59.089	83.681	55.631	1.641	14.891	16.981	-8.619	-3.019	-12.939	-6.549	9.541	-4.75868	-7.439	17.181	-15.1332	-10.199	13.261	9.831	-10.6212	-12.889	6.021	0.546681	1.171	11.751	11.3155	10.024	12.231	12.2298	4.001	-11.0938	-11.699	-8.109	29.681	1.02272	2.011	7.791	-12.5198	-13.279	3.131	-3.97501	-3.059	-2.809	7.711	6.00173	4.57836	7.621	7.25209
alasgaasalsb		0.677356	122.901	326.991	33.2912	-18.4288	15.1012	13.7612	-12.2988	-3.38883	-11.8788	-8.12883	9.13117	-5.36595	-8.09883	16.6512	-17.2293	-11.4388	11.1412	9.58117	-11.3598	-13.4188	6.96117	1.35769	2.09117	12.3612	11.9196	10.653	12.7812	12.7799	4.33117	-11.2082	-11.6588	-8.11883	28.8012	-0.85048	0.63117	7.85117	-13.0463	-13.4588	4.38117	-3.00394	-1.90883	-1.85883	5.76117	4.0215	2.65028	8.94117	8.56968
albialbialas		4.38009	5.52509	104.405	5.61509	-6.83491	1.09509	9.51509	-14.8549	-4.85491	-11.9649	-10.0449	9.02509	-5.31419	-7.08491	17.2251	-17.7292	-9.29491	8.20509	9.04509	-11.8872	-12.3749	7.95509	2.37206	3.47509	10.7351	10.2917	9.17809	15.4951	15.4937	4.49509	-11.1648	-10.5149	-7.80491	29.7251	-0.392951	3.30509	7.40509	-13.5981	-12.4049	5.61509	-1.88737	-0.254911	-0.624911	7.83509	6.08854	4.99976	8.01509	7.64419
aloalsalse		-3.6169	64.5974	31.0074	83.9374	36.2374	38.6774	6.78743	-4.42257	-4.86257	-11.6826	0.997429	12.5974	0.285979	-1.59257	19.1774	-7.9173	-2.95257	7.14743	8.07743	-9.32213	-10.9626	1.20743	-3.04684	-2.51257	-0.852571	-1.09832	-2.10863	-0.672571	-0.672811	5.14743	-7.51866	-7.70257	-6.40257	28.5274	3.86139	5.35743	5.83743	-11.2272	-11.7126	-1.49257	-6.99919	-6.21257	-6.94257	6.83743	5.76764	4.45309	-0.652571	-0.863421
alogaoals		-12.4812	-24.7123	36.3477	120.388	32.4777	16.3277	0.0876619	-3.59234	-6.87234	-15.9723	1.74766	14.4277	4.35998	1.38766	18.7077	-3.0415	-1.17234	3.61766	8.04766	-6.01855	-9.37234	-1.60234	-4.97775	-4.94234	-2.29234	-2.51446	-3.42738	-3.33234	-3.33257	4.46766	-5.75783	-7.22234	-6.78234	22.9877	2.92052	1.76766	5.00766	-8.70903	-10.9823	-5.63234	-9.96364	-9.83234	-10.9323	3.95766	3.00368	1.80272	-8.31234	-8.50287
alogaoino		-15.826	-41.5871	85.6929	135.113	33.1029	4.29294	-4.58706	2.00294	-4.54706	-15.7071	-0.977064	20.9829	12.4533	9.33294	23.9129	5.04912	6.31294	3.26294	12.4229	0.512416	-3.05706	0.0329364	-2.76093	-2.89706	0.272936	0.0603564	-0.722404	-1.30706	-1.30733	8.47294	-0.238854	-1.93706	-3.50706	24.6429	7.28455	5.71294	8.58294	-3.0308	-5.58706	-5.05706	-8.68354	-8.74706	-10.7871	7.64294	6.72181	5.75316	-11.0171	-11.1967
alpalpalas		0.448251	39.3584	-43.6216	47.6184	6.87841	19.6184	18.1784	-6.92159	-4.55159	-14.4316	-7.32159	8.57841	-5.73589	-7.29159	17.0084	-14.6185	-8.38159	13.6984	8.54841	-11.7888	-12.7016	4.62841	-0.843395	-0.00159486	8.20841	7.78828	6.52879	10.3284	10.3273	2.69841	-12.2638	-11.9516	-8.74159	29.7684	1.47289	4.01841	6.36841	-13.7669	-13.3716	1.51841	-5.51046	-4.32159	-3.99159	9.57841	7.9469	6.56137	6.02841	5.6712
alpgapalas		-1.39881	72.2752	-26.0748	45.2852	3.14519	8.54519	17.6452	-8.98481	-5.05481	-14.6148	-8.01481	8.44519	-5.81673	-8.41481	16.1252	-15.5931	-10.9448	12.9052	8.34519	-11.9581	-14.2248	4.63519	-0.819236	-0.234806	9.55519	9.12488	7.80599	9.94519	9.94405	2.75519	-12.1988	-12.8248	-9.25481	28.2752	-0.00955617	0.875194	6.28519	-13.8374	-14.6648	1.64519	-5.38282	-4.52481	-4.20481	7.57519	5.89593	4.41532	5.55519	5.18943
alpogapoalte		10.166			-5.19689	-9.66689	17.9031	16.4031	-9.49689	-0.616892	-1.47689	-0.196892	10.4531	-5.14834	-8.59689	19.5431	-19.6461	-11.8869	11.5731	10.5231	-12.4617	-14.8869	4.60311	-1.10363	-0.226892	12.6631	12.3431	11.1461	14.1031	14.1028	6.23311	-10.9049	-11.4369	-8.53689	36.0931	2.46859	4.49311	9.08311	-13.9506	-14.2869	3.16311	-4.68974	-3.31689	-4.20689	8.93311	7.36007	5.97998	3.68311	3.42378
alpogapoinpo		11.1903			-6.74168	-34.6917	23.0283	16.2483	-10.4817	0.558316	0.258316	-1.01168	13.4283	-2.06745	-5.60168	21.1183	-19.0006	-10.5217	11.8383	13.3183	-9.68534	-11.9717	6.81832	1.10479	2.04832	15.4483	15.0858	13.9732	16.0883	16.0879	9.60832	-7.66842	-8.11168	-6.26168	36.4683	2.4757	4.85832	12.0983	-11.0621	-11.1417	6.18832	-1.79333	-0.291684	-1.86168	8.15832	6.45005	5.27123	3.60832	3.31874
alsalsalpo		3.2738			33.7687	15.0487	33.6087	13.4887	-4.52134	-2.46134	-5.85134	-0.0813373	10.2387	-4.1324	-6.01134	18.7487	-14.3014	-7.45134	9.44866	8.12866	-12.5517	-13.7013	2.33866	-2.85161	-2.00134	3.63866	3.36397	2.20256	5.29866	5.29835	4.55866	-10.611	-10.3913	-8.01134	32.3687	3.05397	5.67866	6.29866	-14.1874	-13.8813	0.238663	-6.6101	-5.37134	-5.79134	7.70866	6.36963	4.97401	1.74866	1.51878
alsalsalse		0.361783	58.9475	-53.1325	48.2175	34.4775	40.4275	12.5375	-4.14249	-3.43249	-7.78249	-0.232487	10.1375	-3.70601	-5.31249	18.1575	-12.6211	-6.43249	8.72751	7.67751	-12.0336	-13.0925	1.52751	-3.43136	-2.65249	1.27751	1.01502	-0.133557	1.80751	1.80721	3.87751	-10.5062	-10.2625	-8.13249	30.6275	2.91028	5.35751	5.65751	-13.7698	-13.5525	-0.782487	-7.21958	-6.11249	-6.48249	5.60751	4.32351	2.94223	1.72751	1.50615
alsalsalte		2.38447	79.7605	-75.5595	33.4105	19.5005	20.3205	12.8305	-4.92955	-3.40955	-6.77955	-1.30955	9.79045	-4.53536	-6.26955	18.2305	-14.2154	-7.55955	8.79045	7.81045	-12.7195	-13.7795	1.76045	-3.42412	-2.57955	1.84045	1.57414	0.385772	3.61045	3.61014	4.02045	-11.0066	-10.7395	-8.39955	31.6105	2.66901	5.29045	5.92045	-14.3819	-14.0595	-0.339548	-7.12626	-5.90955	-6.26955	5.67045	4.37008	2.91724	2.34045	2.11678
alsbalsbalbi		2.98144	-67.9742	175.746	-24.9242	-47.5942	6.46581	7.80581	-17.2642	-6.93419	-13.0142	-9.68419	7.64581	-6.91016	-8.70419	16.1258	-19.5375	-10.8642	6.49581	8.34581	-12.931	-13.3942	7.16581	1.46028	2.59581	10.1858	9.73864	8.59026	13.9758	13.9744	3.06581	-12.8732	-12.1942	-9.33419	28.6358	-2.03388	1.78581	6.61581	-14.751	-13.4842	4.57581	-3.09704	-1.42419	-1.74419	5.87581	4.15483	2.98426	8.59581	8.22261
alsbgasbalas		0.960451	-61.4145	-341.144	16.2455	-31.4645	15.8055	12.2955	-13.7145	-4.55446	-12.1645	-6.80446	8.15554	-6.5118	-9.28446	16.1355	-18.8066	-12.4445	9.34554	9.07554	-12.2159	-14.1845	6.45554	0.752108	1.55554	11.7855	11.3434	10.0747	13.5355	13.5341	3.20554	-12.6521	-13.0145	-9.60446	29.0055	-1.36733	0.425538	7.21554	-14.087	-14.3145	3.70554	-3.87383	-2.66446	-2.74446	5.08554	3.35189	1.96987	9.12554	8.75497
alsealsealpo		6.40524			27.2659	25.6159	54.8859	15.6459	-5.97413	-0.144126	-2.54413	-0.404126	10.6659	-4.16406	-6.16413	19.7559	-15.4776	-7.62413	10.7659	9.38587	-12.1474	-13.1841	3.75587	-1.61027	-0.634126	6.98587	6.69868	5.56457	9.06587	9.06555	5.26587	-10.6081	-10.2541	-7.89413	34.6159	3.70763	6.83587	7.57587	-13.8386	-13.2341	1.57587	-5.61518	-4.18413	-4.82413	7.75587	6.32389	5.02118	3.39587	3.15787
alsealseals		1.87354	65.3268	-24.6032	47.4268	38.1968	49.8968	13.7368	-4.71322	-2.31322	-5.88322	-0.483223	10.4968	-3.6577	-5.34322	18.8368	-13.1677	-6.52322	9.32678	8.38678	-11.8721	-12.9032	2.24678	-2.82514	-1.98322	2.75678	2.48968	1.3458	3.70678	3.70648	4.27678	-10.5357	-10.2432	-8.06322	31.9268	3.28312	5.93678	6.34678	-13.6616	-13.3232	-0.163223	-6.8006	-5.60322	-6.05322	5.54678	4.22566	2.86478	2.52678	2.30221
alsealsealte		5.35947	98.0327	5.62269	36.9427	28.5727	43.1027	15.0827	-6.32731	-1.09731	-3.41731	-1.70731	10.3327	-4.4905	-6.35731	19.3427	-15.355	-7.73731	10.1327	9.13269	-12.3124	-13.2773	3.22269	-2.14996	-1.18731	5.31269	5.03435	3.86895	7.45269	7.45237	4.75269	-11.0159	-10.6373	-8.26731	33.9127	3.31378	6.40269	7.25269	-14.0383	-13.4373	0.992689	-6.15141	-4.75731	-5.32731	5.76269	4.36983	3.00084	3.92269	3.69122
alsegaseals		1.22657	-42.0966	-145.887	34.2434	32.5334	36.9934	12.0534	-7.21665	-2.89665	-6.83665	0.883351	10.4934	-3.55671	-6.34665	18.2834	-13.7163	-8.76665	8.47335	8.54335	-11.6105	-14.0866	1.67335	-3.36696	-2.79665	4.63335	4.35612	3.15821	3.50335	3.50304	4.38335	-10.3729	-11.0766	-8.64665	31.5234	2.98992	3.85335	6.53335	-13.3946	-14.3666	-0.416649	-7.03416	-6.17665	-6.68665	4.24335	2.86102	1.42547	1.30335	1.07115
alsegasealte		4.29843	-86.524	-287.884	33.116	24.906	31.386	13.466	-7.68399	-2.04399	-4.11399	-1.42399	10.536	-4.19781	-7.18399	18.646	-16.062	-10.144	9.03601	9.28601	-12.0694	-14.474	2.67601	-2.66623	-1.96399	6.55601	6.26723	5.05041	6.11601	6.11569	5.06601	-10.656	-11.274	-8.61399	32.686	2.17318	3.46601	7.48601	-13.7367	-14.444	0.816007	-6.30974	-5.25399	-5.88399	3.36601	1.91533	0.471327	2.66601	2.42666
alsegaseinse		2.06471	11.3206	69.5306	44.5906	11.1506	37.6806	11.7506	-7.19939	-2.18939	-4.18939	-2.05939	13.6206	-0.533577	-3.44939	20.3006	-13.1902	-7.45939	8.43061	11.8106	-8.71415	-11.0494	3.79061	-1.36566	-0.699387	8.53061	8.21767	7.06687	7.17061	7.17026	7.54061	-7.6038	-8.20939	-6.78939	32.4006	3.02714	4.29061	9.84061	-10.5786	-11.2594	2.08061	-4.80834	-3.79939	-4.97939	2.98061	1.41103	0.175403	1.39061	1.1351
alsgasalo		-4.56744	-47.279	15.831	57.391	30.301	16.601	2.16095	-4.05905	-5.18905	-12.909	2.56095	11.741	-0.148347	-3.00905	17.931	-8.00635	-5.02905	5.23095	6.81095	-9.93677	-12.969	-0.349047	-4.45268	-4.22905	-0.769047	-1.01557	-2.08266	-3.12905	-3.1293	4.63095	-7.55512	-8.72905	-7.32905	27.641	3.95427	3.59095	4.73095	-11.6747	-13.499	-2.41905	-7.70557	-7.32905	-8.06905	6.83095	5.7287	4.34065	-2.96905	-3.18
alsgasalse		-0.64014	38.1546	158.195	44.1446	25.4646	25.6946	10.2646	-6.27544	-5.50544	-7.87544	-0.305437	10.3346	-3.42346	-6.13544	17.6746	-13.1358	-8.61544	7.40456	7.81456	-11.8145	-14.3054	0.934563	-3.99545	-3.47544	2.25456	1.98321	0.779563	1.14456	1.14426	4.02456	-10.3188	-11.0654	-8.72544	29.8046	2.15511	2.83456	5.80456	-13.5624	-14.6454	-1.18544	-7.60623	-6.83544	-7.29544	3.35456	2.01403	0.553743	0.184563	-0.0435769
alsgasins		-1.9946	-35.3655	-63.8455	33.3245	-2.68549	5.42451	7.30451	-5.16549	-2.79549	-9.72549	-1.52549	13.9545	0.558743	-2.22549	20.0745	-10.2065	-5.78549	7.07451	10.9145	-8.22044	-10.7555	2.48451	-2.37132	-1.89549	4.12451	3.83388	2.64561	3.33451	3.33418	7.14451	-6.89853	-7.70549	-6.36549	30.3845	3.3494	3.94451	8.75451	-10.1655	-11.2855	0.554513	-5.7895	-5.05549	-5.97549	3.57451	2.12782	0.787553	-0.815487	-1.05535
altealtealpo		10.0442			10.9556	-2.57441	18.6456	16.6156	-7.85441	-0.174415	-1.08441	-2.47441	10.2556	-5.40374	-7.66441	20.0956	-18.4481	-9.41441	11.3756	10.1956	-12.7683	-13.7744	4.62559	-1.11991	-0.0144147	9.56559	9.26605	8.08073	13.3556	13.3553	5.68559	-11.3656	-10.9344	-8.25441	36.5556	3.24796	6.86559	8.58559	-14.3733	-13.5044	2.75559	-5.06656	-3.40441	-4.13441	8.38559	6.90237	5.52543	5.32559	5.08121
altealteals		5.78752	122.599	-10.0712	23.2088	9.82878	14.9888	14.3488	-6.46122	-2.36122	-4.23122	-2.57122	9.79878	-5.21538	-7.15122	18.8988	-16.307	-8.69122	9.74878	8.74878	-12.9969	-14.0212	2.89878	-2.58965	-1.62122	4.62878	4.35182	3.13994	7.53878	7.53846	4.60878	-11.3973	-11.0512	-8.49122	33.7188	2.7659	5.79878	6.98878	-14.6249	-14.0512	0.928777	-6.37112	-4.96122	-5.42122	6.00878	4.63627	3.17255	3.96878	3.73866
altealtealse		7.22008	134.888	15.3783	27.0183	15.0483	27.5883	15.4283	-7.2917	-1.2317	-2.7217	-2.8117	10.0083	-5.21851	-7.2117	19.3883	-16.8969	-8.7517	10.4083	9.3983	-12.75	-13.7017	3.5983	-1.96897	-0.941705	6.5283	6.24364	5.05002	9.4083	9.40798	4.9083	-11.4342	-11.0117	-8.4717	34.7883	3.0486	6.3583	7.6383	-14.4149	-13.6917	1.5583	-5.90364	-4.4017	-4.9817	6.0483	4.62582	3.21896	4.7383	4.50337
altegatealpo		9.30696			19.4862	-10.5338	12.0362	15.3762	-9.67376	-1.22376	-1.94376	-1.99376	10.2962	-5.32272	-8.62376	19.2262	-19.4315	-11.9738	10.5262	10.2462	-12.6979	-15.0438	4.26624	-1.46308	-0.603762	11.0062	10.6968	9.46103	11.5662	11.5659	5.98624	-11.0678	-11.5638	-8.61376	35.2962	1.9805	3.94624	8.77624	-14.1829	-14.5138	2.90624	-4.91717	-3.58376	-4.36376	6.41624	4.88071	3.42487	4.58624	4.3345
altegatealse		6.31226	162.273	258.263	28.1234	2.79337	18.7434	14.1034	-9.73663	-3.59663	-3.86663	-1.93663	9.73337	-5.44214	-8.50663	18.5034	-17.8874	-11.3566	9.57337	9.35337	-12.7646	-15.0966	2.95337	-2.59537	-1.82663	8.39337	8.09895	6.85181	8.90337	8.90304	4.73337	-11.6047	-12.1366	-9.36663	34.0034	2.27038	3.87337	7.63337	-14.4113	-14.9366	1.22337	-6.23735	-5.06663	-5.70663	5.14337	3.66571	2.17772	3.48337	3.24127
altegateinte		7.40041	44.6041	-81.4559	21.6241	-36.8459	3.51409	14.1541	-10.0259	-1.39591	-2.09591	-5.21591	12.5541	-2.96984	-6.21591	20.1941	-18.362	-10.9159	9.72409	12.6641	-10.1928	-12.4259	5.19409	-0.582379	0.294091	11.9941	11.6647	10.4277	12.2141	12.2137	8.03409	-8.983	-9.43591	-7.38591	34.7241	1.6467	3.64409	11.1341	-11.7848	-12.0159	4.21409	-3.67769	-2.31591	-3.52591	3.22409	1.61587	0.209761	4.22409	3.95912
b3as3		2.29273	-117.106	-78.9458	83.6542	-28.4758	23.8442	9.75417	-2.41583	5.52417	-10.4158	-20.4758	6.65417	-6.72506	-9.61583	16.7642	-11.3178	-8.47583	6.61417	12.7542	-5.92018	-9.09583	11.7442	6.91743	7.18417	10.9342	10.5127	9.30167	13.2842	13.2835	0.114168	-13.471	-14.6758	-12.3158	32.9942	7.18425	6.65417	9.80417	-8.47235	-10.4258	5.64417	-0.429612	-0.0158325	-0.325832	5.35417	3.93685	2.36633	7.92417	7.56075
b3bi3		3.90024	79.5825	12.3625	-6.1875	-80.1175	-22.0775	2.2325	-13.1675	-2.3675	-10.9375	-23.1475	5.7025	-7.84857	-10.5375	13.5825	-18.9826	-12.5075	-3.4675	6.7525	-12.7868	-14.7575	5.7625	0.7392	1.3925	7.3325	6.87805	5.81758	11.4125	11.4113	1.7625	-12.8412	-13.1975	-11.8075	26.9925	-1.45833	0.4225	5.4225	-14.0439	-14.3775	4.8025	-1.90999	-0.8675	-2.0775	-0.4075	-1.96646	-3.18997	4.7625	4.37934
b3p3		1.53778	-107.076	76.5139	62.1139	-40.4661	6.91393	19.7839	4.88393	8.23393	-11.8061	-19.6961	5.52393	-7.7825	-10.0861	16.6239	-9.40886	-7.07607	11.4739	13.2439	-4.96733	-7.77607	10.5339	5.77953	6.04393	6.15393	5.73346	4.50215	12.8039	12.8035	-2.00607	-15.1224	-16.0961	-13.5561	34.0039	9.42465	8.94393	9.57393	-8.08566	-9.93607	2.93393	-2.87358	-2.52607	-2.36607	8.99393	7.68024	5.99973	6.55393	6.18794
b3po3		41.2061			28.4819	-46.9881	6.53187	18.9219	-3.19813	9.17187	7.93187	9.36187	8.22187	-5.86796	-9.78813	17.9919	-15.8348	-10.5481	14.8419	14.2319	-6.03702	-9.69813	12.6919	7.79519	8.18187	21.4719	21.1574	20.0181	27.1719	27.1717	9.45187	-5.56446	-6.92813	-5.61813	40.3819	10.3766	10.6719	14.4319	-5.63365	-7.46813	13.6919	7.08395	7.78187	6.31187	13.5219	12.2335	10.7105	14.9219	14.653
b3s3		28.019	-85.2591	-77.7191	94.2309	-28.7591	-4.17908	12.9209	1.29092	3.90092	3.07092	-8.00908	0.76092	-11.0863	-13.5191	11.1309	-11.7513	-10.2591	13.0109	7.22092	-8.9244	-12.1191	4.98092	1.01898	1.13092	3.59092	3.30174	2.25148	7.27092	7.27084	0.14092	-11.3367	-12.5791	-12.0691	34.3809	12.3367	11.2309	6.49092	-9.02741	-11.3491	3.68092	-1.1646	-1.00908	-1.80908	5.71092	4.82144	3.18592	2.19092	1.94162
b3sb3		-1.15441	-244.837	-143.427	-0.647204	-83.3372	29.1328	5.5928	-7.0572	2.9828	-12.3972	-15.6272	6.0728	-8.37623	-10.8672	16.0328	-16.845	-10.8872	-1.3472	9.9228	-10.6601	-12.6672	8.4328	3.11735	3.7728	9.1628	8.7366	7.52582	11.5428	11.5418	-1.0972	-16.2944	-16.6272	-14.6972	30.7128	1.38221	3.0828	6.9928	-13.3697	-13.8672	3.2328	-3.69907	-2.7072	-3.5172	0.842796	-0.641444	-2.16019	2.8028	2.44253
b3se3		29.8275	62.086	-28.504	78.136	-16.704	31.046	15.106	-0.0340137	5.17599	4.98599	-5.80401	2.75599	-9.8892	-13.174	12.956	-13.4363	-11.494	14.586	9.73599	-7.87789	-11.754	7.88599	3.60054	3.71599	11.016	10.7191	9.61158	14.246	14.2459	2.52599	-10.1402	-11.774	-10.644	35.836	11.1708	9.79599	9.17599	-7.93618	-10.604	6.69599	1.27362	1.47599	0.535986	7.87599	6.85556	5.19071	5.18599	4.92848
b3te3		35.1242	49.7316	-33.8884	61.8016	-63.5784	1.37162	17.2116	-2.70838	7.57162	3.67162	1.80162	5.37162	-9.05744	-12.0184	15.9316	-16.7885	-11.4384	13.7316	12.7716	-7.75344	-10.5384	10.7516	5.74	6.25162	16.1716	15.8745	14.6839	20.7416	20.7414	5.38162	-9.62396	-10.4084	-9.15838	38.6216	9.0161	10.0116	12.3316	-7.84774	-9.07838	10.0116	3.43163	4.22162	2.98162	8.61162	7.44184	5.76171	11.0116	10.7548
basalasbp		4.90124	146.904	-53.3362	62.6338	-54.6062	-3.35619	15.2838	-1.81619	3.64381	-8.96619	-15.3262	8.80381	-5.22306	-7.75619	18.6038	-10.9624	-7.23619	12.4438	13.7338	-5.90322	-8.52619	11.4538	6.33251	6.77381	12.1338	11.7225	10.4564	14.8038	14.8031	2.77381	-11.5156	-12.3162	-9.54619	34.4738	7.38545	7.63381	11.0438	-8.20951	-9.57619	6.25381	-0.210414	0.423806	0.383806	9.66381	8.25936	6.59951	8.66381	8.30544
basalasgaas		2.82879	34.5043	11.1043	75.9743	-12.9457	16.3543	13.8443	-7.16572	1.01428	-8.98572	-11.2757	9.53428	-4.76744	-7.97572	17.8043	-14.031	-10.1857	11.9843	12.3843	-7.97722	-11.0957	9.74428	4.39226	4.83428	13.8743	13.4545	12.1475	14.8543	14.8533	4.32428	-10.6329	-11.7857	-8.47572	31.7843	3.31722	3.23428	10.2843	-9.86225	-11.4657	6.10428	-0.814258	-0.145718	-0.175718	6.89428	5.30976	3.72598	9.48428	9.12099
basbasbbi		3.68928	-82.6779	-22.1879	58.5221	-42.5479	8.38209	6.29209	-6.44791	2.21209	-10.1179	-20.3979	5.95209	-7.63681	-10.4979	15.2321	-14.5965	-10.6579	2.53209	10.4921	-8.709	-11.5379	9.05209	4.11214	4.51209	9.72209	9.29409	8.11568	11.3721	11.3713	0.822087	-13.2467	-14.2079	-12.0079	30.6321	3.71235	3.88209	8.29209	-10.6123	-12.0779	5.25209	-1.09381	-0.477913	-1.01791	3.47209	2.04665	0.522627	6.84209	6.47614
basbasbn		17.7171	-20.7541	-59.8141	52.4859	-37.5141	0.905946	12.6459	0.0459462	8.03595	-4.94405	-12.9741	6.27595	-5.60765	-8.23405	15.1859	-8.2236	-6.75405	12.0159	11.0859	-5.1971	-8.47405	11.7759	7.60963	7.72595	11.7759	11.3515	10.3093	12.4559	12.4556	3.55595	-8.1529	-9.48405	-8.44405	34.0059	11.931	10.6259	9.74595	-6.02185	-8.35405	8.79595	3.68492	3.86595	3.20595	8.74595	7.49841	6.06249	8.58595	8.21922
basbasbp		1.92213	-83.7426	-34.5526	81.3974	-31.8726	17.6774	13.3074	0.167447	6.42745	-10.8426	-20.0426	6.30745	-7.07349	-9.78255	16.7274	-10.7233	-8.07255	8.31745	12.9474	-5.61318	-8.68255	11.3574	6.54909	6.81745	9.29745	8.87697	7.65594	13.2274	13.2269	-0.502553	-13.956	-15.0926	-12.6426	33.3374	7.88696	7.34745	9.78745	-8.32166	-10.2626	4.81745	-1.17498	-0.782553	-0.932553	6.44745	5.06931	3.45197	7.60745	7.2437
basbasbsb		1.71564	-128.967	-80.3669	59.3631	-48.6569	24.1231	8.0831	-3.9769	4.4931	-11.0469	-18.5769	6.2431	-7.52102	-10.2969	16.2531	-13.4321	-9.6469	3.8431	11.7131	-7.64215	-10.4669	10.3831	5.38285	5.7731	10.5131	10.0928	8.87508	12.3431	12.3424	-0.286896	-14.4303	-15.3769	-13.1169	32.0531	5.06097	5.1931	8.8431	-10.1714	-11.6769	4.7731	-1.59688	-1.0069	-1.4569	3.9431	2.5171	0.940284	6.3231	5.96279
bbialbibsb		5.38025	10.3292	184.789	-0.490806	-99.0308	-27.0608	5.37919	-11.1808	-0.150806	-9.77081	-16.3608	8.42919	-5.93024	-8.51081	17.0692	-17.3314	-10.2808	1.10919	10.2992	-10.4499	-12.1908	9.17919	3.79274	4.58919	10.7692	10.3537	9.18403	15.5692	15.568	3.58919	-11.8888	-12.0408	-9.90081	30.5192	0.477714	2.76919	8.47919	-12.2134	-12.2508	6.80919	-0.382056	0.839194	-0.0108062	3.13919	1.53695	0.222854	6.46919	6.11674
bbibbibas		4.10579	-59.4937	22.1763	31.8163	-60.0337	-8.49373	4.73627	-9.17373	0.416269	-10.2637	-21.3637	5.98627	-7.62034	-10.4137	14.6363	-16.6518	-11.4737	-0.133731	8.98627	-10.449	-12.8637	7.66627	2.67149	3.19627	9.29627	8.86014	7.73317	11.9863	11.9853	1.34627	-13.0323	-13.7037	-11.9037	29.1063	1.34794	2.34627	7.15627	-12.0963	-13.0137	5.16627	-1.3824	-0.553731	-1.42373	2.06627	0.583769	-0.806931	5.60627	5.23543
bbibbibp		4.45592	-63.2055	76.9345	28.5045	-58.8355	-10.8755	8.77449	-6.08551	1.81449	-9.92551	-19.8955	5.97449	-7.72169	-10.3555	14.8745	-15.9758	-11.0055	1.99449	9.67449	-9.79363	-12.1455	7.62449	2.62288	3.14449	8.46449	8.036	6.88642	12.2545	12.2536	1.33449	-13.004	-13.6355	-11.6655	29.9045	2.33721	3.29449	7.72449	-11.5053	-12.4255	4.94449	-1.55724	-0.755514	-1.42551	3.59449	2.16551	0.698736	6.40449	6.03874
bbibbibsb		2.34205	-105.171	239.349	2.4986	-83.7114	-5.9914	3.2986	-11.1314	-0.601397	-11.2814	-20.4914	5.8186	-8.04253	-10.6814	14.3986	-18.3097	-12.0114	-2.8214	7.8286	-12.08	-14.0814	6.6186	1.49535	2.1486	8.0386	7.59433	6.48177	11.4386	11.4375	0.838603	-13.9771	-14.3414	-12.7514	28.2486	-0.524017	1.2786	5.9786	-13.8087	-14.2114	4.3086	-2.48239	-1.4614	-2.5314	0.0586026	-1.47191	-2.80007	4.3386	3.96366
bnbpbas		16.7159	-111.435	-11.1555	41.8645	-35.5355	-6.33545	14.1745	0.0445484	6.99455	-6.31545	-12.8155	4.33455	-7.55092	-9.89545	13.4045	-9.37642	-7.92545	11.8345	9.70455	-6.45195	-9.49545	9.25455	5.10457	5.24455	9.21455	8.78581	7.74885	10.8545	10.8542	1.96455	-9.60954	-10.7855	-9.77545	32.6945	10.9655	9.82455	8.40455	-7.18107	-9.37545	6.51455	1.48109	1.66455	1.14455	8.73455	7.49171	6.06193	6.18455	5.81412
boalobs		10.8437	-42.9404	-69.5104	99.1796	-0.120383	5.47962	3.95962	2.30962	2.01962	-5.09038	-3.32038	7.77962	-0.955883	-2.49038	14.3196	-2.43486	-0.700383	7.39962	4.72962	-7.0692	-9.12038	1.97962	-0.832443	-0.710383	2.23962	2.00956	1.29842	-2.78038	-2.78048	2.01962	-6.36096	-7.02038	-8.67038	27.5996	11.2787	10.9996	2.92962	-8.34875	-9.79038	-0.850383	-4.28098	-4.10038	-5.63038	7.33962	6.59792	5.56822	-2.10038	-2.29868
boalsgase		8.00253	-143.426	-26.8765	107.214	16.9535	8.14354	5.27354	-4.13646	-1.55646	-3.99646	1.27354	7.78354	-3.76206	-6.85646	14.5135	-10.0307	-8.05646	7.13354	5.83354	-10.3266	-13.8865	0.673537	-3.2298	-3.12646	3.28354	3.02044	2.0041	1.05354	1.05336	4.54354	-7.1172	-8.63646	-7.91646	29.0535	6.33929	5.11354	4.98354	-10.7556	-13.1665	0.383537	-4.59967	-4.39646	-5.46646	8.29354	7.27546	5.85348	-0.676463	-0.903253
bpalpbas		2.96097	-187.821	16.9793	85.9793	-13.1907	2.32928	18.6393	-0.0407206	4.64928	-11.5407	-14.9107	7.09928	-6.78849	-9.02072	16.9993	-11.6425	-8.03072	13.0193	12.7093	-6.61937	-8.98072	9.40928	4.33514	4.78928	10.5093	10.1053	8.83492	15.2493	15.2486	0.559279	-13.4656	-14.1107	-11.3407	32.5793	6.16092	6.52928	9.69928	-9.20548	-10.4307	3.65928	-2.68812	-2.05072	-1.94072	10.2693	8.89277	7.22706	7.06928	6.71674
bpalpgap		0.86763	-121.111	27.4789	51.5389	-3.04106	-4.53106	19.8089	-3.70106	-0.611055	-13.5911	-10.7611	7.60894	-6.55714	-9.45106	16.2689	-13.5862	-10.5511	14.3889	10.7189	-9.13396	-12.2011	6.81894	1.5432	1.89894	11.6089	11.1907	9.82844	11.9089	11.9081	1.58894	-12.8846	-14.0211	-10.6111	30.5789	3.33739	2.97894	8.16894	-11.335	-13.1111	2.46894	-4.18621	-3.67106	-3.30106	10.0189	8.5454	6.79131	5.71894	5.35375
bpbpbas		1.69647	-86.8545	19.3955	73.9055	-35.4945	11.7555	16.7155	2.60554	7.36554	-11.2345	-19.7245	5.93554	-7.42015	-9.93446	16.6755	-10.0868	-7.60446	9.96554	13.1255	-5.27931	-8.23446	10.9555	6.17087	6.43554	7.72554	7.30507	6.0774	13.0955	13.095	-1.17446	-14.4703	-15.5245	-13.0145	33.6555	8.62018	8.10554	9.72554	-8.17654	-10.0745	3.93554	-1.96838	-1.60446	-1.58446	7.68554	6.34091	4.68766	7.16554	6.80073
bpbpbbi		2.38261	-103.43	67.4104	41.2304	-43.0296	-1.02961	12.5604	-3.03961	2.94039	-10.0896	-18.0696	4.57039	-9.20112	-11.7196	14.0404	-14.7988	-11.2996	5.05039	10.1304	-9.10705	-11.7896	7.18039	2.21788	2.60039	5.63039	5.20347	3.98749	9.14039	9.1398	0.0203855	-13.9482	-14.7996	-12.1296	29.9904	3.53037	3.61039	7.95039	-10.8709	-12.3596	3.62039	-2.63157	-2.06961	-2.15961	5.32039	3.98761	2.31776	7.17039	6.80437
bpbpbn		15.8273	-111.893	25.0773	41.8773	-43.0327	-10.9127	15.7173	2.50729	8.49729	-9.48271	-14.5427	4.22729	-7.45866	-9.51271	13.8873	-7.96194	-6.54271	12.8073	10.0473	-5.72089	-8.49271	9.61729	5.53253	5.69729	7.36729	6.9366	5.91647	9.87729	9.877	0.527293	-10.7468	-11.7627	-10.8327	33.1273	12.0948	11.1473	8.10729	-7.06265	-9.08271	5.49729	0.596333	0.797293	0.357293	10.1673	8.94202	7.5352	5.10729	4.73492
bpbpbsb		1.45154	-150.509	145.121	38.9508	-54.6892	13.4508	15.2208	1.03076	6.34076	-11.2592	-16.9292	5.60076	-8.22492	-10.6192	16.1608	-12.3267	-8.92924	7.18076	12.2308	-6.98282	-9.59924	9.51076	4.52929	4.91076	7.34076	6.92481	5.68148	12.0108	12.0102	-1.17924	-15.1084	-15.9092	-13.4292	32.7708	6.43269	6.55076	9.04076	-9.72009	-11.1892	3.31076	-2.9158	-2.36924	-2.45924	6.42076	5.08263	3.39426	6.52076	6.16192
bpoalpobte		31.143			26.0748	-49.3952	-3.11515	18.0548	-4.38515	6.19485	5.09485	5.71485	9.17485	-5.7848	-9.22515	19.0548	-16.9328	-10.3652	14.7248	13.4848	-8.15319	-11.0452	9.96485	4.71821	5.34485	18.4848	18.1779	17.0021	22.3448	22.3446	8.57485	-7.41962	-8.22515	-6.38515	40.0448	8.29217	9.62485	13.1048	-8.35192	-9.38515	10.0048	2.91744	3.93485	2.68485	11.7648	10.4965	8.8932	10.8048	10.5443
bpoalpogapo		21.4113			5.0058	-19.9042	18.0958	16.5758	-8.4642	2.6858	1.9658	4.3658	10.3258	-4.92021	-9.0342	19.2858	-18.922	-12.2442	13.0358	12.4458	-9.90013	-13.3142	7.7558	2.31981	2.9558	17.1958	16.8741	15.6958	18.8458	18.8455	8.3158	-8.33903	-9.5042	-7.0942	37.9458	4.90733	5.8258	11.7258	-10.5961	-11.8842	7.5658	0.0746391	1.1458	-0.114201	10.7458	9.29201	7.81249	7.6758	7.40777
bsalsbo		19.8256	-37.8626	-112.943	163.437	-5.70258	0.767419	10.9374	-0.182581	1.91742	1.50742	0.937419	5.08742	-5.61481	-7.39258	12.5474	-8.38908	-6.05258	9.53742	5.40742	-9.20662	-11.4726	1.89742	-1.62189	-1.40258	3.44742	3.18818	2.30256	3.34742	3.34731	3.70742	-6.68223	-7.37258	-7.93258	29.9174	9.77774	9.65742	5.01742	-9.02348	-10.5226	2.00742	-2.33011	-2.02258	-3.25258	9.97742	9.09933	7.81784	1.63742	1.41299
bsalsbse		19.013	-291.477	-74.9768	111.443	-0.756805	17.8732	15.0332	-0.486805	3.11319	-1.04681	-4.28681	5.01319	-7.81789	-9.90681	14.6132	-11.9815	-8.35681	13.1332	9.05319	-8.81724	-11.1068	4.53319	0.162385	0.563195	7.39319	7.11752	6.0357	8.37319	8.37303	1.93319	-10.9011	-11.5068	-10.5668	33.9432	9.11736	9.58319	7.62319	-9.73747	-10.9668	2.47319	-3.04026	-2.48681	-3.28681	7.95319	6.94538	5.38321	2.52319	2.283
bsalsegas		9.5364	240.771	-68.5286	41.0114	9.9114	19.4614	11.1614	-3.6086	-2.8786	-1.9386	0.1414	8.4514	-4.96449	-8.1286	16.4914	-12.5934	-9.5286	9.7614	8.9714	-9.97735	-13.3686	2.9814	-1.67845	-1.3886	4.7514	4.47514	3.28376	4.4114	4.41117	4.3114	-9.41389	-10.7386	-8.8486	32.6014	6.0219	5.4414	7.5114	-11.044	-13.0886	1.5714	-4.41972	-3.9786	-4.6286	3.8114	2.65329	1.01708	1.7714	1.53347
bsalsegate		12.1724	267.614	99.9939	32.4939	-4.7161	16.5639	11.9939	-6.4761	-2.1861	-2.4661	-0.606103	7.9639	-6.16888	-9.5761	16.6839	-15.2179	-11.2761	10.5839	9.6939	-10.5199	-13.9061	3.8739	-1.11288	-0.716103	7.7139	7.43148	6.20091	8.2039	8.20365	4.2039	-10.539	-11.8261	-9.6061	34.0539	5.42703	5.1939	8.2639	-11.6611	-13.5061	2.3939	-4.13926	-3.5161	-4.2261	5.2939	4.05819	2.39408	3.0439	2.80333
bsalsgas		7.81153	-31.1571	-75.2071	66.7129	8.86288	8.58288	10.6229	-3.26712	-1.88712	-4.85712	-0.997118	7.92288	-5.16798	-8.03712	15.8829	-11.9626	-9.02712	9.51288	8.42288	-9.95758	-13.0871	2.12288	-2.41985	-2.13712	4.39288	4.12281	2.94618	2.98288	2.98266	3.21288	-10.0719	-11.2571	-9.59712	31.3629	5.74046	5.28288	6.72288	-11.2329	-13.1371	0.302882	-5.48652	-5.05712	-5.68712	4.58288	3.45752	1.84462	0.232882	-1.833e-05
bsbalsbbas		4.88421	-100.986	-149.726	49.7337	-76.1063	5.98374	10.5737	-6.21626	3.34374	-9.03626	-11.8363	8.42374	-6.20073	-8.71626	17.8137	-15.2328	-9.49626	6.03374	12.1337	-8.71984	-10.7763	10.5737	5.13822	5.82374	12.6437	12.2336	10.976	15.2037	15.2028	2.80374	-12.5585	-12.9263	-10.3763	32.5437	3.05174	4.58374	9.80374	-10.8379	-11.3763	6.39374	-0.677611	0.333739	-0.116261	5.20374	3.71759	2.14213	7.04374	6.69058
bsbbsbbas		0.620061	-176.817	-94.3772	32.1428	-66.9872	25.5228	6.83279	-5.40721	3.77279	-11.6972	-16.9672	6.07279	-8.04179	-10.6872	16.0428	-15.2371	-10.4072	1.27279	10.7928	-9.19092	-11.6272	9.35279	4.19071	4.71279	10.0028	9.58086	8.36374	11.9228	11.9219	-0.707214	-15.384	-16.0372	-13.9372	31.3328	3.17357	4.06279	7.91279	-11.7907	-12.8072	4.00279	-2.65257	-1.86721	-2.48721	2.49279	1.04382	-0.514194	4.52279	4.16337
bsbbsbbbi		0.705432	-209.207	181.193	3.9831	-83.3969	10.7531	4.3431	-9.1369	1.1331	-11.7469	-18.0169	5.9231	-8.23883	-10.8069	15.1831	-17.6289	-11.5069	-2.1769	8.8431	-11.4156	-13.4269	7.4731	2.25179	2.9031	8.5931	8.15803	6.99517	11.3931	11.392	-0.1069	-15.1213	-15.4769	-13.6969	29.4531	0.38752	2.1331	6.4831	-13.605	-14.0569	3.7831	-3.08168	-2.0769	-3.0069	0.4331	-1.07175	-2.49984	3.7131	3.34562
bsbbsbbn		21.4752	20.0742	-21.8558	2.75422	-73.8258	-0.155777	11.2342	-3.01578	6.77422	-4.76578	-6.84578	5.17422	-7.50691	-10.0858	13.7142	-12.9139	-9.91578	8.46422	9.22422	-8.48178	-11.2958	10.1542	5.6312	5.94422	12.5242	12.1238	11.028	12.2442	12.2437	3.66422	-9.19333	-10.1858	-9.16578	32.5242	8.10905	7.77422	8.49422	-8.81609	-10.4858	8.71422	3.00499	3.47422	2.59422	6.83422	5.60445	4.0819	7.71422	7.36949
bsbbsbbp		0.961496	-184.332	89.3282	19.4782	-70.2318	20.8982	10.8282	-2.38183	5.06817	-11.5318	-15.7318	6.09817	-8.08066	-10.5518	16.3382	-14.4169	-9.80183	3.41817	11.4882	-8.48119	-10.8218	9.29817	4.13652	4.64817	9.05817	8.64072	7.40626	12.2582	12.2574	-0.781831	-15.3867	-15.9818	-13.7418	32.1382	4.2408	5.09817	8.44817	-11.1844	-12.1918	3.66817	-2.92778	-2.17183	-2.60183	4.08817	2.69042	1.06342	5.24817	4.89109
bsealsebs		21.8654	267.287	-21.2325	68.6875	-5.58253	30.1375	13.9975	-0.542528	1.14747	3.04747	-2.41253	5.87747	-7.29439	-9.74253	15.4775	-12.4139	-8.69253	12.5175	9.80747	-8.64672	-11.2625	5.52747	1.03457	1.41747	6.05747	5.77579	4.67281	9.23747	9.23731	3.57747	-9.71662	-10.5025	-9.40253	35.3775	9.52215	9.81747	8.73747	-9.23894	-10.6725	4.12747	-1.59415	-1.03253	-1.93253	5.51747	4.47062	2.87865	4.12747	3.88296
bsealsebte		22.2861	214.798	202.768	61.0584	-22.8316	27.9984	14.6384	-3.63159	2.13841	0.568409	-3.38159	5.94841	-7.88447	-10.7416	15.8984	-14.809	-10.3616	13.7584	10.7384	-8.91103	-11.7316	6.68841	1.886	2.33841	10.9084	10.6248	9.46713	13.5984	13.5982	3.52841	-10.749	-11.6216	-10.0516	36.0084	8.13947	8.56841	9.53841	-9.74651	-11.1416	4.82841	-1.42026	-0.731591	-1.63159	7.79841	6.67747	5.03855	5.31841	5.0746
bsealsegase		10.9352	4.30265	64.2126	58.5126	19.2526	42.0626	13.1426	-5.44735	-0.887352	-1.17735	-1.18735	8.53265	-5.34962	-8.77735	16.9526	-14.2951	-10.5574	10.6726	9.99265	-9.83194	-13.3074	4.07265	-0.780552	-0.417352	8.81265	8.52746	7.33987	8.09265	8.0924	4.40265	-10.0389	-11.3774	-9.31735	33.5926	5.45044	5.08265	8.46265	-11.0519	-12.9974	2.38265	-3.96934	-3.39735	-4.21735	4.62265	3.37844	1.79073	2.81265	2.5694
bsealtegapo		16.4137			41.7236	-5.29643	18.2936	15.1036	-7.40643	0.513566	-0.0464336	1.36357	8.84357	-6.09661	-9.84643	17.8436	-17.7395	-12.3464	11.7036	11.0236	-10.6415	-14.0264	5.69357	0.392916	0.933566	12.8436	12.5447	11.319	13.8036	13.8033	5.92357	-10.0325	-11.2264	-8.82643	36.0936	4.7781	5.16357	9.91357	-11.5892	-13.1164	4.73357	-2.39281	-1.52643	-2.48643	7.71357	6.36701	4.75813	5.16357	4.91164
btealtebpo		27.7102			51.8849	-30.8851	2.42489	17.4449	-4.63511	5.42489	2.35489	2.20489	8.11489	-6.82979	-9.86511	18.1949	-17.12	-10.5251	14.5649	12.9749	-8.56739	-11.0851	9.28489	4.03814	4.71489	16.1549	15.8553	14.6706	19.9349	19.9347	6.57489	-9.28131	-9.84511	-8.11511	38.7349	7.39594	9.01489	12.1449	-9.17199	-9.93511	8.19489	1.16682	2.21489	1.04489	10.3749	9.13726	7.51614	9.16489	8.91023
btealtebse		26.9745	-101.182	-163.962	68.9076	-13.5624	11.5076	17.0576	-2.35244	4.89756	3.81756	1.64756	7.15756	-7.46737	-10.3924	17.2276	-15.9785	-10.5224	13.2376	11.8376	-9.04665	-11.7324	7.60756	2.52817	3.08756	12.2676	11.9767	10.7843	16.1276	16.1274	5.79756	-9.43757	-10.1524	-8.47244	38.1576	8.2219	9.23756	11.1076	-9.44081	-10.5624	6.85756	0.180228	1.03756	-0.00244223	7.12756	5.98075	4.27555	7.59756	7.34805
btealtegate		16.6458	42.0577	-58.7023	36.3477	-19.8923	6.2177	14.7477	-8.2723	0.587703	-0.932297	-0.752297	8.7077	-6.72697	-10.3523	17.9177	-18.9801	-12.9923	11.3177	11.5377	-10.8779	-14.0123	5.9577	0.433283	1.0677	12.8477	12.5515	11.2723	13.9777	13.9774	5.7677	-10.7593	-11.7623	-9.2023	36.1877	3.78787	4.6377	10.3677	-11.9047	-13.1423	4.8977	-2.5347	-1.5423	-2.4723	5.4777	4.13978	2.43733	6.5977	6.34849
ga3n3		-16.0497	114.704	5.18439	6.48439	39.2044	-18.9056	2.13439	-10.2856	-7.50561	-21.0156	-1.08561	14.4744	3.80904	-1.69561	18.5544	-3.62551	-5.92561	0.454389	7.36439	-7.31324	-14.1356	-2.03561	-5.74533	-6.36561	3.46439	3.03327	1.92632	-2.97561	-2.97605	3.92439	-6.79146	-10.6056	-9.17561	24.5744	3.93812	-1.49561	4.16439	-10.1198	-15.6356	-6.14561	-10.7936	-11.5056	-12.4556	3.30439	1.78424	0.466369	-10.4156	-10.7795
ga3o3		-18.433	105.517	-39.4927	112.217	52.1873	-9.04266	-7.95266	-0.752657	-6.18266	-14.0127	4.35734	18.1373	10.0075	4.83734	20.9273	3.24449	0.887343	0.967343	9.27734	-2.02914	-8.39266	-2.89266	-5.54329	-6.17266	0.0773432	-0.135387	-1.02022	-3.91266	-3.91289	5.72734	-2.51387	-6.12266	-6.62266	22.3173	5.939	0.657343	5.49734	-5.50062	-10.6527	-7.98266	-11.3945	-12.1227	-13.9227	5.61734	4.6657	3.51315	-15.4027	-15.5838
ga3po3		9.34873			-3.35774	-14.2077	9.33226	14.3423	-14.7477	-3.11774	-2.18774	1.32226	10.2323	-5.18017	-10.8577	17.4723	-22.2394	-17.4277	9.99226	10.5923	-12.2441	-17.4277	4.04226	-1.58274	-1.18774	15.6723	15.3165	14.0705	12.2823	12.2819	6.99226	-10.1318	-12.5877	-9.15774	33.4223	-0.341865	-1.61774	9.59226	-13.3653	-16.1277	3.92226	-3.92317	-3.17774	-4.28774	5.91226	4.19211	2.75171	1.53226	1.24676
ga3s3		-4.67641	17.1259	-44.8841	24.5559	15.3159	-9.13409	4.20591	-9.33409	-6.80409	-10.8741	0.495914	10.4659	-2.7732	-7.78409	16.4859	-13.1197	-12.6041	4.48591	7.98591	-10.8799	-16.4741	-0.734086	-5.48479	-5.57409	3.83591	3.55024	2.22463	-0.384086	-0.384396	3.86591	-9.93721	-12.8441	-10.0241	27.7059	1.15745	-2.17409	5.85591	-12.7613	-16.7341	-2.57409	-8.75244	-8.79409	-9.30409	0.155914	-1.2715	-2.91459	-4.55409	-4.79321
ga3se3		-0.719422	91.0972	127.827	38.6972	25.5572	27.6172	8.87718	-11.1928	-6.14282	-6.03282	-0.272819	10.0172	-4.0078	-9.16282	16.5072	-16.3909	-14.5628	5.87718	8.83718	-11.4579	-16.8528	0.577181	-4.47897	-4.38282	8.21718	7.91038	6.62109	3.23718	3.23685	4.31718	-10.6165	-13.3328	-10.3528	29.4172	0.446881	-2.20282	6.95718	-13.1963	-16.7228	-0.872819	-7.60447	-7.37282	-8.13282	0.147181	-1.41301	-2.94282	-1.94282	-2.1964
ga3te3		5.17991	-20.1629	-82.1029	22.9471	-10.9229	-5.8429	11.9271	-13.9929	-4.9429	-4.6929	-3.0229	9.2671	-6.18926	-11.6129	16.5671	-21.5804	-17.8729	7.6671	9.9671	-12.7449	-17.9329	2.3771	-3.31393	-3.0029	12.0271	11.7034	10.3276	8.4571	8.45675	5.1971	-11.6764	-14.1729	-10.5329	31.7871	-1.06623	-2.8029	8.5771	-14.1579	-17.1329	1.7371	-6.02052	-5.4329	-6.1829	0.9771	-0.63787	-2.32322	1.8371	1.57483
gaasgaasgan		-3.46792	36.6988	38.4288	31.2888	8.35879	-21.6412	9.58879	-11.5612	-4.66121	-12.2312	-4.77121	10.7388	-2.56425	-7.78121	16.2488	-13.7048	-13.3512	7.02879	8.96879	-10.009	-15.7812	3.47879	-1.46625	-1.59121	9.67879	9.23581	7.9218	7.84879	7.84785	5.51879	-8.46869	-11.5112	-7.94121	27.1588	0.573039	-3.03121	7.33879	-11.4666	-15.5512	1.79879	-4.62648	-4.68121	-4.89121	2.17879	0.618079	-1.07276	2.49879	2.11427
gaasgaasgap		-3.05209	-54.1117	34.1883	56.8283	7.5383	-16.1517	16.0183	-10.6517	-3.4217	-11.8117	-6.7517	9.7183	-4.54342	-9.3717	15.9883	-16.6298	-14.9117	11.8883	10.5583	-9.91462	-14.9417	6.2883	0.830003	0.928303	14.6283	14.1725	12.7588	12.6183	12.6171	4.7983	-10.3421	-12.8617	-8.4017	27.6283	-1.13281	-3.5417	8.7583	-11.6111	-14.8717	3.9183	-3.2094	-2.9617	-2.6817	3.5183	1.71338	0.0903728	7.8083	7.42228
gaasgaasgasb		-1.33913	-67.8797	-34.2997	45.4603	-10.6197	-11.2497	13.5003	-12.9097	-3.35972	-10.3197	-6.18972	9.32028	-5.24258	-10.0897	15.6503	-18.7789	-16.0997	10.0603	10.5003	-10.6069	-15.3897	6.91028	1.29531	1.53028	14.4003	13.9385	12.5488	13.6903	13.689	5.15028	-10.5418	-12.8797	-8.37972	27.5703	-2.4119	-4.23972	9.01028	-12.0877	-14.9497	5.01028	-2.4356	-1.99972	-1.86972	1.05028	-0.778477	-2.36129	10.1203	9.73205
gaasinasgap		-0.396955	82.7442	-16.8458	52.0242	-11.7258	-13.9558	15.9742	-9.74582	-1.70582	-10.9758	-7.64582	12.0842	-2.2684	-6.10582	17.8842	-15.4048	-11.6358	12.5142	12.6342	-8.03587	-11.6258	7.78418	2.25396	2.65418	14.9342	14.4672	13.135	15.2542	15.2529	7.33418	-7.9998	-9.51582	-6.25582	29.0242	-0.182959	-0.665819	10.9642	-9.64263	-11.5058	5.83418	-1.43022	-0.775819	-0.995819	2.84418	0.985201	-0.437329	9.17418	8.7809
gaasinngap		-3.73114	129.365	4.85521	26.1152	-6.00479	-26.5248	9.69521	-9.94479	-4.19479	-14.7248	-4.10479	12.7552	-0.438642	-4.47479	17.8152	-11.9519	-9.70479	7.35521	10.6752	-8.13324	-12.3048	3.91521	-1.04697	-0.904792	9.02521	8.57582	7.32095	8.24521	8.24423	6.69521	-7.20566	-9.17479	-6.92479	27.4052	1.02395	-0.574792	8.73521	-9.92233	-12.5448	1.89521	-4.55099	-4.24479	-4.86479	2.04521	0.436038	-1.0686	1.15521	0.767128
gabiinbigasb		4.77186	-33.1824	-520.332	-15.6524	-46.3724		10.4376	-16.5824	-3.81245	-8.94245	-7.37245	9.86755	-4.84192	-8.60245	15.9476	-21.5051	-14.7524	7.46755	10.4276	-11.2735	-14.0024	7.57755	1.81652	2.57755	13.2176	12.724	11.5295	17.5076	17.506	6.83755	-9.54886	-10.4324	-7.14245	27.0676	-4.69577	-3.34245	9.47755	-12.4266	-13.0524	6.96755	-0.932946	0.297554	-0.392446	-1.32245	-3.25838	-4.43424	10.6176	10.2089
gangapgaas		-5.17536	-13.1573	41.6427	20.4327	10.1927	-29.0073	10.1027	-11.4573	-5.98729	-14.8273	-5.05729	9.81271	-3.36666	-8.53729	15.4227	-13.7788	-13.7473	6.55271	7.89271	-10.8109	-16.6273	2.03271	-2.86864	-3.03729	8.23271	7.78901	6.45502	5.68271	5.68182	4.01271	-9.75029	-12.8373	-9.27729	26.0727	-0.00714392	-3.75729	6.01271	-12.4835	-16.6773	-0.0172939	-6.33507	-6.46729	-6.56729	2.51271	0.963846	-0.760274	-0.00729392	-0.392274
ganinngap		-9.25647	156.805	12.0252	14.5652	10.6952	-27.6248	4.85525	-9.38475	-5.70475	-19.7148	-1.08475	14.7752	2.82842	-1.30475	19.1952	-6.94602	-5.88475	3.42525	10.1352	-6.63517	-11.2648	0.885249	-3.46497	-3.57475	4.93525	4.49344	3.33916	2.34525	2.34453	6.00525	-6.35166	-8.66475	-7.60475	26.5052	2.90262	0.515249	7.36525	-9.14399	-12.4148	-2.33475	-7.90572	-7.93475	-8.98475	2.05525	0.520089	-0.854961	-5.56475	-5.94431
gaogasgase		-9.02165	79.0511	26.0711	60.5011	29.5311	4.17112	-0.388881	-6.36888	-5.89888	-10.9889	0.781119	12.9211	1.21211	-4.18888	17.8911	-8.50058	-9.04888	2.37112	8.42112	-8.2386	-14.4489	-1.26888	-5.3693	-5.65888	1.97112	1.69923	0.527499	-1.60888	-1.60915	4.84112	-7.35856	-10.7089	-8.87888	26.0711	2.3458	-1.96888	5.92112	-10.4916	-15.1189	-3.87888	-9.24003	-9.51888	-10.5589	0.921119	-0.355251	-1.85337	-7.95888	-8.18823
gaoinogas		-13.9927	49.7739	-16.7561	106.544	22.7739	-10.6361	-3.61611	-1.17611	-3.44611	-14.9561	3.95389	20.1839	10.3651	6.20389	23.5139	1.30993	1.82389	3.07389	13.2439	-0.634191	-5.34611	0.543889	-2.83338	-3.05611	2.63389	2.38297	1.4219	0.393889	0.393579	8.34389	-1.86517	-4.30611	-4.99611	26.1539	6.11091	3.38389	9.48389	-4.16091	-7.59611	-4.29611	-8.7145	-8.88611	-10.7761	3.84389	2.68632	1.54283	-11.2861	-11.4957
gaoinotlo		-11.4097	-31.5519	-15.9019	121.098	38.6781	-11.0619	-3.69186	3.75814	-1.43186	-11.8419	-1.86186	24.9881	16.6545	13.2381	27.2181	7.81894	9.19814	3.50814	17.2281	5.45088	1.72814	2.90814	0.0948919	-0.0718581	3.05814	2.80968	2.0496	5.26814	5.26779	13.0081	4.26706	2.41814	-0.631858	27.6681	10.2487	8.58814	13.4881	1.89633	-0.711858	-1.47186	-5.20607	-5.27186	-8.14186	6.78814	5.66681	4.88035	-8.67186	-8.87578
gapgapgaas		-4.24942	-86.5226	24.7674	41.8974	7.39736	-26.8726	17.0974	-10.4326	-4.56264	-13.8626	-6.86264	8.95736	-5.22924	-10.0126	15.2874	-16.6576	-15.2926	11.9174	9.60736	-10.6612	-15.7626	5.01736	-0.410398	-0.352638	13.7874	13.3361	11.8931	10.9774	10.9762	3.60736	-11.3534	-13.9226	-9.46264	26.8074	-1.52066	-4.11264	7.63736	-12.4889	-15.8726	2.38736	-4.64831	-4.48264	-4.08264	4.23736	2.46249	0.779502	5.74736	5.36388
gapgapgan		-6.51731	-76.0836	45.9564	8.65644	14.2864	-37.3736	10.8364	-11.1636	-6.99356	-17.0136	-5.18356	9.21644	-3.8222	-8.94356	14.9264	-13.4952	-13.7836	6.38644	7.16644	-11.2369	-17.0936	0.966441	-3.88761	-4.10356	7.02644	6.58211	5.22887	4.00644	4.0056	2.87644	-10.6475	-13.7736	-10.2436	25.3164	-0.227269	-4.13356	5.05644	-13.1069	-17.4136	-1.46356	-7.66973	-7.87356	-7.85356	3.05644	1.51904	-0.236139	-1.98356	-2.36896
gapgapgasb		-3.45635	-132.645	-1.73532	13.9947	-16.1753	-34.0653	15.9347	-12.2153	-5.40532	-14.0053	-6.12532	7.87468	-6.59869	-11.3753	14.2947	-18.8629	-16.9553	10.3347	8.73468	-12.0594	-16.9953	4.48468	-1.09142	-0.955322	13.0947	12.6454	11.1884	10.5747	10.5735	3.02468	-12.3627	-14.8153	-10.2653	26.0847	-3.10352	-5.35532	6.93468	-13.77	-16.9153	2.19468	-5.09317	-4.80532	-4.43532	2.65468	0.895748	-0.829452	6.35468	5.97399
gapinpgaas		-1.95049	-238.822	-29.6724	33.4376	-13.6224	-28.4124	16.8876	-9.25237	-2.55237	-12.9224	-6.75237	11.4776	-2.78112	-6.58237	17.2876	-15.2901	-11.8924	12.3876	11.8376	-8.60564	-12.2724	6.62763	1.13394	1.48763	14.8476	14.3861	13.027	13.1876	13.1864	6.34763	-8.78925	-10.3624	-7.09237	28.1176	-0.608357	-1.30237	10.0076	-10.3351	-12.3424	4.49763	-2.66843	-2.08237	-2.20237	4.60763	2.78012	1.30255	7.32763	6.93843
gapogapogas		4.43563			5.58044	-7.42956	4.48044	11.0004	-12.8096	-4.47956	-4.99956	0.540437	10.2804	-4.49915	-10.0296	17.1104	-19.2699	-16.2196	8.05044	9.62044	-12.0524	-17.4896	2.37044	-3.01321	-2.79956	11.5904	11.2626	9.96639	7.94044	7.94009	5.95044	-10.1469	-12.8496	-9.45956	31.5104	0.119087	-2.09956	8.26044	-13.4113	-16.6996	1.69044	-5.65111	-5.19956	-6.02956	4.12044	2.4952	0.948367	-1.06956	-1.33723
gapogapogase		5.9649			10.6371	-2.64289	16.8671	12.5971	-13.6129	-4.37289	-3.52289	0.567112	10.1571	-4.85807	-10.3929	17.1771	-20.3463	-16.6529	8.61711	9.96711	-12.1324	-17.4329	2.81711	-2.64714	-2.35289	13.2371	12.9006	11.6292	9.26711	9.26676	6.06711	-10.3899	-12.9629	-9.62289	32.1771	-0.0594277	-1.89289	8.66711	-13.4666	-16.5329	2.22711	-5.28057	-4.71289	-5.67289	4.06711	2.39963	0.911022	-0.0128877	-0.286048
gapogapogate		7.88234			8.12449	-14.5655	2.52449	13.5245	-14.5255	-3.76551	-3.03551	-0.13551	9.85449	-5.59464	-11.1955	17.1445	-22.0973	-17.6655	9.20449	10.3445	-12.4883	-17.6855	3.44449	-2.20944	-1.84551	14.4545	14.1103	12.8188	10.9945	10.9941	6.36449	-10.7002	-13.1755	-9.66551	32.8645	-0.63719	-2.08551	9.22449	-13.697	-16.5455	3.15449	-4.6717	-3.97551	-4.95551	4.25449	2.56891	1.04355	1.51449	1.23744
gapoinpogate		8.80189			15.1574	-32.4126	7.13741	14.3774	-12.6826	-1.40259	-0.942585	-2.88259	12.5674	-2.87407	-7.37259	19.3774	-20.2817	-13.7626	9.91741	12.9174	-9.98239	-13.6026	5.47741	-0.236715	0.437415	15.3574	14.9923	13.7917	14.2174	14.217	8.99741	-8.17102	-9.57259	-7.32259	34.1674	0.510305	1.07741	11.7874	-11.2581	-12.6026	5.35741	-2.58897	-1.46259	-2.95259	4.26741	2.53931	1.20846	2.13741	1.84571
gapoinpotlpo		13.2711			-10.232	-37.862	-2.02202	13.758	-13.262	0.477983	1.77798	1.05798	14.538	-0.705697	-4.29202	20.338	-20.0785	-11.212	9.83798	15.158	-7.62609	-9.78202	7.52798	1.83321	2.81798	15.288	14.8673	13.8447	16.428	16.4276	12.398	-4.8213	-5.21202	-4.57202	34.578	0.736373	3.30798	14.608	-8.43495	-8.31202	8.79798	0.751893	2.34798	0.0679826	3.82798	1.9714	0.998483	6.63798	6.30538
gasbgasbgap		-2.02569	-133.976	-79.2757	5.53427	-33.9257	-31.2057	13.2943	-14.2857	-5.23573	-12.5957	-5.81573	7.54427	-7.18996	-11.9757	14.0643	-20.847	-17.9257	8.49427	8.72427	-12.6498	-17.3157	5.11427	-0.604098	-0.335728	12.9543	12.5013	11.0714	11.7743	11.7729	3.26427	-12.6389	-14.8857	-10.3157	26.0443	-4.30235	-5.94573	7.16427	-14.2173	-16.9457	3.14427	-4.44512	-3.95573	-3.74573	0.094272	-1.69601	-3.36198	8.32427	7.94287
gasegasegapo		2.57461			25.4237	10.6237	22.3037	10.6437	-12.4763	-5.49635	-4.86635	-0.0963463	9.94365	-4.58524	-9.93635	16.7137	-18.4659	-15.7863	7.11365	9.25365	-11.9625	-17.3263	1.57365	-3.69535	-3.50635	10.5637	10.2426	8.95786	6.12365	6.12331	5.08365	-10.6156	-13.2763	-10.0963	30.7037	0.125804	-2.17635	7.67365	-13.489	-16.8063	0.553654	-6.57329	-6.18635	-7.01635	2.02365	0.408854	-1.10729	-1.27635	-1.53936
gasegasegas		-2.20666	68.1609	76.6809	33.2609	21.6809	14.9409	7.15091	-10.6291	-6.46909	-7.72909	-0.26909	9.98091	-3.76263	-8.86909	16.2909	-15.4396	-14.0991	5.27091	8.38091	-11.4104	-16.8791	0.0309102	-4.92176	-4.89909	6.53091	6.23037	4.92802	1.86091	1.86059	4.04091	-10.4931	-13.2791	-10.3291	28.6009	0.49895	-2.40909	6.44091	-13.1739	-16.8691	-1.51909	-8.06142	-7.92909	-8.57909	0.0709102	-1.44824	-3.01486	-3.01909	-3.26847
gasegasegate		1.22561	53.5564	67.0264	33.2264	13.0464	17.7464	9.66639	-12.3736	-6.14361	-5.70361	-1.44361	9.47639	-5.02332	-10.2636	16.2364	-18.3641	-15.9736	6.21639	8.91639	-12.1835	-17.5236	0.936394	-4.33656	-4.17361	9.05639	8.74479	7.4236	4.66639	4.66605	4.42639	-11.1481	-13.8036	-10.5836	29.9564	-0.265116	-2.65361	7.24639	-13.7682	-17.1236	-0.173606	-7.25008	-6.90361	-7.64361	0.216394	-1.36042	-2.9488	-1.06361	-1.31973
gaseinsegas		-0.53387	81.0925	215.503	44.9925	6.28251	18.3425	7.57251	-7.87749	-3.73749	-6.25749	-3.02749	13.2125	-0.564453	-4.57749	19.0325	-13.2881	-9.77749	6.23251	11.3525	-8.56647	-12.4475	2.39251	-2.63031	-2.29749	7.67251	7.35393	6.13654	5.75251	5.75216	7.23251	-7.45854	-9.16749	-7.49749	30.3625	1.94171	1.11251	9.43251	-10.3671	-12.5275	1.07251	-5.60742	-5.04749	-6.21749	0.762507	-0.832333	-2.17632	-1.49749	-1.75748
gaseinsegate		1.98062	163.512	349.462	41.7116	-2.6284	20.6716	9.8716	-10.0584	-3.4984	-4.8284	-2.7184	12.8516	-1.60855	-5.7084	19.0916	-15.9167	-11.3384	7.0016	12.0416	-9.08148	-12.7684	3.1616	-2.16324	-1.6884	10.0316	9.69893	8.47165	7.2316	7.23124	7.3116	-8.34382	-9.8784	-8.0084	31.4916	1.13098	0.861599	10.2016	-10.8971	-12.6984	1.9516	-5.23907	-4.4584	-5.7184	0.621599	-1.013	-2.38277	-0.048401	-0.318021
gaseinsetlse		3.72287	-72.7548	25.4352	35.9552	1.8852	10.4552	8.3952	-7.7848	-0.944795	-2.9348	-0.224795	15.1152	1.31604	-1.7648	20.1552	-13.5379	-7.5348	6.1752	14.0352	-6.13269	-8.4648	4.5252	-0.591085	0.0852048	10.2052	9.83465	8.76327	9.9752	9.97481	10.3652	-4.6412	-5.2848	-5.1048	30.9752	1.85302	3.1752	12.5452	-7.63058	-8.2248	4.4352	-2.49452	-1.4348	-3.3348	0.915205	-0.857265	-1.84261	2.4652	2.16902
gasgasgapo		-0.292576			18.8644	2.39444	-3.33556	7.55444	-11.0156	-5.76556	-7.96556	0.194436	10.2944	-3.73802	-9.04556	16.7044	-16.2326	-14.6356	6.17444	8.69444	-11.6176	-17.1956	0.754436	-4.33032	-4.28556	7.61444	7.30799	5.98704	3.72444	3.72411	4.88444	-10.0768	-12.9356	-9.76556	29.5144	0.584756	-2.32556	6.97444	-13.2112	-16.9156	-0.485564	-7.25911	-7.07556	-7.69556	2.13444	0.609176	-1.00623	-3.10556	-3.35903
gasgasgase		-3.55331	44.1448	20.4348	28.7748	18.2548	2.69479	5.57479	-9.99521	-6.70521	-9.35521	-0.00520888	10.1448	-3.33696	-8.39521	16.2948	-14.3414	-13.4352	4.83479	8.11479	-11.2017	-16.7352	-0.395209	-5.24614	-5.28521	5.10479	4.81158	3.49692	0.664791	0.664471	3.92479	-10.2335	-13.0852	-10.1852	28.0248	0.730231	-2.40521	6.09479	-13.0099	-16.8452	-2.06521	-8.42343	-8.38521	-8.94521	0.104791	-1.36952	-2.9744	-3.90521	-4.1496
gasgasgate		-1.44809	-2.13617	-52.3362	22.0538	5.78383	-7.06617	6.52383	-10.9462	-6.42617	-8.82617	-1.06617	9.84383	-4.13655	-9.31617	16.2738	-16.0558	-14.6962	5.26383	8.36383	-11.791	-17.3162	0.123834	-4.95507	-4.92617	6.00383	5.70657	4.35295	2.23383	2.2335	4.22383	-10.5909	-13.4162	-10.2662	28.8438	0.293634	-2.65617	6.53383	-13.4633	-17.1862	-1.22617	-7.93804	-7.79617	-8.33617	0.303834	-1.18336	-2.86352	-2.80617	-3.05282
gasinsgao		-6.01781	15.2285	-10.3015	49.1585	5.85847	2.45847	-0.231527	-3.36153	-3.35153	-9.35153	-7.61153	15.3585	3.77657	-0.541527	19.9785	-6.17663	-4.96153	3.44847	10.8385	-5.61862	-10.3615	0.728473	-3.35152	-3.40153	1.54847	1.2723	0.164783	1.66847	1.66817	8.15847	-3.92116	-6.29153	-5.67153	27.7685	4.25919	1.79847	8.68847	-7.53138	-10.8215	-0.881527	-6.2178	-6.17153	-7.62153	2.56847	1.2474	-0.0613074	-5.94153	-6.17113
gasinsgase		-2.45504	-20.6147	-143.455	28.8753	-2.2747	3.6853	6.4253	-7.0847	-3.4547	-8.4547	-1.6447	13.7653	0.287435	-3.6547	19.4253	-11.7394	-8.6447	5.9653	11.5053	-7.88846	-11.8047	2.1053	-2.80604	-2.5347	6.6853	6.37413	5.1475	4.1053	4.10495	7.1153	-7.16639	-8.9147	-7.3347	29.8053	2.26117	1.2353	9.3453	-9.89705	-12.1847	0.385295	-6.10032	-5.6247	-6.7147	1.5753	0.025315	-1.34937	-2.6247	-2.87974
gasinstls		-0.0689484	-43.1653	-43.2653	24.0847	-12.8753	-19.5053	3.0047	-4.9853	-1.1453	-8.9853	-0.00530321	16.4847	3.43676	0.414697	21.1347	-9.44057	-4.7853	5.4047	14.0547	-4.74135	-7.3653	4.0947	-0.724863	-0.255303	6.3147	5.97169	4.84874	7.7047	7.70431	10.7647	-3.1604	-4.0653	-3.9953	30.1747	3.30774	3.9047	12.2847	-6.41254	-7.5153	3.5547	-2.83837	-2.0753	-3.7253	2.1347	0.469037	-0.619083	0.514697	0.238347
gategategapo		6.51284			17.8625	-13.5775	-1.93747	12.7525	-14.2575	-4.35747	-3.87747	-1.53747	9.57253	-5.90318	-11.4275	16.8725	-21.8774	-17.8175	8.45253	10.1625	-12.6467	-17.8575	2.90253	-2.77649	-2.43747	13.2525	12.9195	11.5838	9.74253	9.74218	5.78253	-11.2115	-13.7075	-10.1175	32.3725	-0.850607	-2.45747	8.90253	-13.9623	-16.8775	2.43253	-5.36881	-4.72747	-5.59747	2.65253	1.00306	-0.606527	1.62253	1.35352
gategategas		1.94495	-12.7787	-63.4187	21.1213	-2.72874	-4.86874	9.25126	-12.3987	-5.71874	-6.63874	-2.08874	9.57126	-5.1711	-10.4987	16.4313	-18.8083	-16.3787	6.42126	9.13126	-12.3416	-17.7387	1.22126	-4.17806	-4.00874	8.80126	8.49259	7.1202	5.28126	5.28092	4.75126	-11.1135	-13.8087	-10.3687	30.3613	-0.340002	-2.75874	7.53126	-13.8752	-17.2687	0.251258	-6.99739	-6.63874	-7.26874	0.691258	-0.857602	-2.5556	-0.598742	-0.852362
gategategase		3.36063	17.3927	1.19267	28.1827	1.12267	7.25267	10.8627	-13.1173	-5.55733	-5.13733	-2.15733	9.44267	-5.53832	-10.8773	16.4727	-19.8874	-16.8673	6.98267	9.49267	-12.4183	-17.6873	1.69267	-3.79277	-3.55733	10.5027	10.1858	8.83528	6.58267	6.58233	4.87267	-11.3524	-13.9373	-10.5073	30.9627	-0.563549	-2.63733	7.95267	-13.9275	-17.1073	0.822671	-6.59708	-6.13733	-6.87733	0.652671	-0.942909	-2.58305	0.372671	0.113881
gateintegapo		7.19771			10.945	-38.635	0.844997	13.125	-12.365	-1.995	-2.275	-3.195	12.555	-2.89743	-7.325	19.375	-19.7576	-13.615	8.985	12.895	-9.95877	-13.605	4.965	-0.766223	-0.115003	13.605	13.2514	12.0097	11.985	11.9846	8.475	-8.6051	-10.025	-7.735	33.775	0.427777	0.814997	11.555	-11.4106	-12.845	4.565	-3.34729	-2.275	-3.665	2.435	0.739757	-0.665513	2.735	2.45199
gateintegase		5.51543	-100.411	-262.871	26.9993	-21.9907	11.3293	12.8293	-10.0807	-1.97069	-1.74069	-4.30069	13.1093	-1.85877	-6.10069	19.6393	-17.1592	-12.0307	8.55931	12.9793	-8.98828	-12.6907	4.72931	-0.812462	-0.270692	12.5393	12.2022	10.9429	11.1793	11.1789	8.62931	-7.69683	-9.21069	-7.04069	33.1793	1.46778	1.40931	11.5193	-10.4738	-12.1507	4.17931	-3.35633	-2.46069	-3.70069	1.88931	0.231008	-1.19129	2.32931	2.05753
gateintetlte		9.16706	-129.43	-64.99	14.91	-46.12	-18.32	11.98	-11.85	-0.720011	-0.260011	-2.69001	14.17	-1.06996	-4.45001	20.01	-18.8384	-11.08	7.92999	14.99	-7.60643	-9.81001	6.25999	0.508329	1.40999	13.24	12.8567	11.7003	14	13.9996	11.08	-5.85909	-6.32001	-5.47001	33.35	0.436699	2.53999	14.01	-8.75601	-8.87001	6.98999	-0.961401	0.469989	-1.45001	0.179989	-1.58945	-2.78418	6.75999	6.45603
ge3as3		-2.53875	-25.6872	-86.4272	75.9128	49.4728	27.0228	11.2028	3.24278	2.24278	-13.9072	-8.74722	14.1128	1.82251	0.0427779	22.9228	-5.54641	-0.217222	5.70278	14.2128	-3.61756	-4.73722	7.37278	2.70891	3.44278	17.1528	16.9192	15.8348	10.0028	10.0025	-0.267222	-13.3913	-13.3672	-14.4972	32.4328	7.54785	9.34278	8.69278	-9.08099	-8.91722	-2.00722	-8.15478	-7.08722	-9.09722	6.94278	5.89354	4.4633	-0.997222	-1.1965
ge3bi3		2.47113	-106.428	4.99206	14.1421		-41.4579	16.3621	0.942057	4.97206	-10.5979	-10.6879	16.0121	3.4533	1.56206	23.4921	-8.36255	-0.757943	12.4721	15.7121	-2.89731	-3.53794	9.47206	4.59191	5.56206	23.4921	23.228	22.2221	26.8521	26.8517	4.21206	-9.75769	-9.34794	-10.7979	32.8721	5.91033	8.99206	11.3621	-7.41488	-6.44794	2.53206	-4.16791	-2.68794	-5.18794	13.4321	12.1466	11.0271	-1.60794	-1.82618
ge3n3		-29.6272	84.4856	20.2356	58.5156	102.066	60.2256	4.11556	7.69556	4.38556	-20.7244	3.08556	21.4956	11.678	8.40556	28.4856	7.58104	8.86556	1.33556	13.5356	-0.0890805	-3.98444	3.06556	-0.13807	-0.25444	9.72556	9.54132	8.59174	-3.39444	-3.3946	-2.20444	-12.0702	-13.8444	-15.9144	28.7556	9.23879	7.47556	5.00556	-8.21361	-11.0544	-12.0844	-16.1663	-16.2144	-18.5944	4.98556	4.3621	2.83004	-17.6144	-17.7755
ge3p3		-4.14462	-256.243	-132.703	51.6068	54.3168	18.5668	14.0268	5.45677	1.75677	-14.5332	-7.46323	14.2768	2.69517	0.916774	23.7968	-1.89872	2.08677	6.00677	14.3068	-2.28958	-3.71323	6.89677	2.49545	3.05677	10.8768	10.6574	9.54361	4.05677	4.05652	-0.913226	-13.0678	-13.3232	-14.6132	33.1768	10.4117	11.4068	8.37677	-8.08706	-8.41323	-3.04323	-8.72357	-7.92323	-9.70323	10.2668	9.34907	7.79728	0.0667736	-0.121986
ge3sb3		-5.07939	-137.464	70.2257	19.2057	17.4857	-12.0143	14.0257	3.0757	5.0357	-13.6343	-11.4443	15.7957	2.99247	1.1557	24.1457	-7.05755	-0.344295	9.2257	16.0157	-2.81143	-3.6343	9.5157	4.52841	5.4357	23.7457	23.5019	22.3875	21.5057	21.5054	1.9757	-12.0312	-11.7543	-12.8243	33.0657	6.33669	8.9157	10.7657	-8.14668	-7.4643	0.565705	-6.14801	-4.8043	-6.9743	10.7557	9.57461	8.2108	-0.594295	-0.798655
geasgeasgebi		-0.567866	-55.7009	-61.5009	57.8991	34.3891	0.599068	12.5991	2.18907	2.62907	-13.1909	-9.22093	14.5791	2.15998	0.309068	22.9591	-6.67591	-0.710932	7.88907	14.6691	-3.49215	-4.50093	7.96907	3.21054	4.01907	19.7291	19.4872	18.4196	15.3191	15.3188	1.05907	-12.385	-12.2709	-13.4709	32.4891	6.88348	9.00907	9.51907	-8.66221	-8.27093	-0.620932	-6.97976	-5.79093	-7.93093	8.97907	7.851	6.50771	-1.23093	-1.43539
geasgeasgen		-10.5506	46.8435	-34.7665	72.1235	75.5935	38.6235	6.86345	5.27345	3.10345	-16.8665	-5.87655	17.3335	5.78453	3.57345	25.4735	-0.44128	3.51345	2.58345	13.7435	-2.77932	-4.77655	6.07345	1.89275	2.34345	11.8335	11.6126	10.5745	3.81345	3.81324	-0.63655	-12.7184	-13.2665	-15.1265	31.5935	8.47495	9.10345	7.08345	-9.24806	-10.0765	-5.36655	-10.8128	-10.1265	-12.4565	4.97345	4.11939	2.5924	-6.49655	-6.68765
geasgeasgep		-3.08562	-97.039	-130.699	69.631	50.411	23.851	12.161	4.10098	1.94098	-14.169	-8.38902	14.081	2.02587	0.240981	23.141	-4.39047	0.460981	5.75098	14.191	-3.23264	-4.46902	7.15098	2.57246	3.25098	14.871	14.6423	13.5466	7.87098	7.87072	-0.539019	-13.34	-13.419	-14.579	32.621	8.4574	9.95098	8.54098	-8.80113	-8.80902	-2.39902	-8.39229	-7.41902	-9.33902	8.05098	7.04804	5.5719	-0.669019	-0.864789
geasgeasgesb		-3.04044	-53.5149	-38.6349	58.1251	39.2051	12.6951	11.8751	2.91511	2.71511	-14.0349	-9.54489	14.6251	2.17091	0.355112	23.2551	-6.07301	-0.364888	6.83511	14.8051	-3.35037	-4.39489	8.04511	3.26854	4.05511	19.5051	19.2686	18.1709	13.5851	13.5848	0.445112	-12.9632	-12.8749	-13.9849	32.5751	7.12216	9.11511	9.37511	-8.77288	-8.46489	-1.17489	-7.5149	-6.36489	-8.41489	8.10511	7.01198	5.59774	-0.594888	-0.795548
geasgesbgebi		-1.43174	-89.6795	3.09046	38.2705		-11.6695	13.5705	2.09046	3.55046	-13.0595	-10.1695	15.1405	2.56829	0.700458	23.3505	-7.16788	-0.719542	9.06046	15.2405	-3.22392	-4.12954	8.66046	3.80071	4.67046	21.7505	21.5049	20.4294	19.1405	19.1402	1.82046	-11.9007	-11.6995	-12.8895	32.6705	6.47544	8.87046	10.1905	-8.34184	-7.77954	0.220458	-6.31902	-5.02954	-7.23954	10.2505	9.07757	7.76128	-1.04954	-1.25585
geassnasgep		-2.12552	-16.4095	47.6305	58.9405	18.1205	33.3805	13.6105	5.39054	3.97054	-11.3595	-6.74946	16.5605	4.18088	2.44054	25.2905	-3.5184	2.02054	7.28054	16.0505	-1.92701	-2.94946	8.79054	4.06166	4.82054	15.5405	15.3094	14.1998	12.4805	12.4803	2.45054	-10.8086	-10.7195	-12.0695	34.7005	9.59512	11.5505	10.6905	-7.25078	-6.96946	0.120539	-6.12136	-5.01946	-7.09946	7.59054	6.54567	5.08055	2.97054	2.77488
geassnasgesb		-2.89005	-49.6256	-237.066	40.6944	6.9244	10.7344	12.3844	3.2544	3.5644	-12.9256	-8.4056	16.6244	3.89349	2.1144	24.9944	-5.45848	0.824396	7.8344	16.2744	-2.37495	-3.2356	9.0844	4.16857	5.0344	19.2544	19.014	17.9059	16.1344	16.1341	2.6044	-11.2102	-10.9856	-12.2256	34.0744	7.84575	10.1944	10.9644	-7.72647	-7.1656	0.364396	-6.20928	-4.9356	-7.1256	7.5944	6.47303	5.05933	2.8644	2.66255
geassnsbpbbi		6.85806	-137.147	80.2834	-31.5966		-27.9466	16.9134	0.913394	5.24339	-6.22661	-1.24661	18.1234	4.88042	3.14339	25.2734	-8.12522	-0.0466055	11.9434	17.8034	-1.86414	-2.23661	11.0634	5.89004	6.96339	22.2234	21.9568	20.8863	26.9234	26.9231	8.02339	-6.70307	-6.08661	-7.56661	35.5434	7.35756	10.7934	14.1534	-5.70303	-4.42661	5.90339	-1.18732	0.433394	-2.10661	9.67339	8.38562	7.14633	13.9734	13.7549
gebigebigeas		0.917627	-83.6228	-31.9328	39.6972		-21.9628	14.1872	1.19724	3.32724	-12.2828	-9.98276	14.9572	2.45616	0.577241	22.8672	-7.8851	-1.16276	10.0072	14.9372	-3.47526	-4.32276	8.44724	3.61718	4.50724	21.6272	21.3757	20.3342	20.7272	20.7269	2.33724	-11.3833	-11.1328	-12.4328	32.3572	6.07526	8.62724	10.1972	-8.31171	-7.65276	0.677241	-5.8654	-4.53276	-6.84276	11.0272	9.81836	8.58149	-1.66276	-1.87323
gebigebigen		-5.69424	7.22625	2.87625	59.8263		3.08625	9.13625	3.74625	4.37625	-15.4637	-6.99375	18.5563	6.52139	3.81625	26.0063	-2.51806	2.06625	6.53625	14.8063	-2.69797	-4.97375	7.44625	3.00438	3.52625	16.5263	16.291	15.2471	13.2963	13.296	2.18625	-10.7393	-11.4237	-13.3637	32.5763	7.73666	8.36625	8.84625	-8.60725	-9.45375	-2.47375	-8.41538	-7.57375	-10.2237	9.25625	8.30443	6.8041	-7.07375	-7.27439
gebigebigep		0.90025	-167.42	-78.7504	29.5196		-22.5504	15.7296	2.76961	3.86961	-12.2904	-9.22039	15.4496	3.13405	1.20961	23.6096	-6.27829	-0.120387	10.7296	15.4996	-2.58747	-3.60039	8.70961	3.94625	4.76961	20.2396	19.9946	18.9339	18.8896	18.8893	2.53961	-10.9049	-10.7904	-12.1004	33.1496	7.51927	9.69961	10.5996	-7.55737	-7.12039	0.749613	-5.66089	-4.43039	-6.64039	12.6896	11.5297	10.2303	-0.490387	-0.696147
gebigebigesb		-0.104874	-123.329	47.891	15.771		-32.709	15.621	1.70103	5.02103	-11.609	-10.949	15.971	3.32059	1.44103	23.741	-7.92429	-0.618971	11.421	15.851	-2.84953	-3.55897	9.50103	4.58182	5.53103	23.661	23.4041	22.3609	25.091	25.0907	3.48103	-10.513	-10.149	-11.459	32.961	6.05505	8.96103	11.191	-7.65006	-6.77897	1.88103	-4.82882	-3.39897	-5.77897	12.561	11.3099	10.1075	-1.33897	-1.55235
gebisnbigesb		1.72817	-156.029	-426.159	-1.72878		-40.9388	17.4312	2.34122	6.00122	-9.25878	-9.31878	17.7012	4.80072	2.92122	25.3512	-7.30977	0.421219	12.9012	17.3212	-1.82689	-2.41878	11.0012	5.95233	6.96122	24.2012	23.9387	22.885	28.8112	28.8109	5.76122	-8.59856	-8.14878	-9.55878	34.8312	7.24539	10.3912	12.9112	-6.42256	-5.36878	3.98122	-2.94319	-1.40878	-3.90878	12.8412	11.5722	10.3553	2.88122	2.66531
gengengeas		-16.328	78.3835	-0.676504	60.9835	83.8835	44.3035	5.4535	5.7435	3.4735	-17.9765	-0.526504	18.9735	8.14095	5.8735	26.5335	2.81428	6.1835	1.7735	13.1035	-2.17707	-4.4965	4.3635	0.633366	0.893496	9.8735	9.67179	8.69377	0.403496	0.403316	-1.1065	-12.2278	-12.9765	-15.2865	30.4035	8.79761	9.0735	5.8335	-9.14029	-10.4065	-8.2965	-13.109	-12.6665	-15.1265	4.7435	4.00486	2.5096	-11.2565	-11.4304
gengengebi		-10.1309	45.8893	-4.3907	38.0993	75.8393	21.2493	6.8693	5.6093	4.3693	-16.5107	-0.220698	19.1793	8.31186	5.8793	26.3493	1.92391	5.3993	3.8093	13.4493	-2.03989	-4.4107	5.1593	1.34147	1.6293	12.9693	12.7682	11.7853	5.2293	5.22912	0.699302	-10.6211	-11.4207	-14.0107	31.0693	9.16282	9.3793	6.8193	-8.44437	-9.6807	-6.1107	-11.103	-10.6007	-13.2607	6.7393	5.94208	4.48681	-10.0507	-10.2214
gengengep		-18.4581	-11.2948	-20.6448	56.0852	87.7952	45.7752	6.21517	5.96517	3.46517	-18.4148	-0.314829	18.8652	8.1834	5.85517	26.6152	3.54242	6.55517	1.73517	13.0152	-1.97423	-4.44483	3.99517	0.329601	0.535171	8.20517	8.00687	7.01644	-1.49483	-1.49501	-1.61483	-12.5097	-13.3648	-15.5448	30.2052	9.0477	9.07517	5.55517	-9.1004	-10.5548	-8.97483	-13.6709	-13.3048	-15.6248	5.68517	4.97615	3.44566	-11.6548	-11.8265
gengengesb		-13.1005	122.849	99.2187	42.9387	74.8487	33.1487	5.77874	5.88874	4.22874	-17.7313	-0.881262	18.9787	8.11564	5.76874	26.3687	2.2506	5.62874	2.51874	13.2687	-2.1544	-4.48126	4.87874	1.06028	1.33874	11.6787	11.4802	10.48	3.22874	3.22856	-0.161262	-11.4177	-12.1913	-14.7013	30.7487	9.00582	9.22874	6.35874	-8.81601	-10.0513	-7.02126	-11.9803	-11.5013	-14.0613	5.43874	4.67239	3.17013	-9.69126	-9.86057
gengepgeas		-11.3257	-34.6318	-63.5018	66.5682	76.0082	34.8482	7.79816	5.79816	2.81816	-17.0818	-5.42184	17.1582	5.82665	3.70816	25.4982	0.404236	4.12816	2.75816	13.6482	-2.49349	-4.46184	5.76816	1.66865	2.07816	10.0782	9.86195	8.8197	1.99816	1.99795	-0.981844	-12.7688	-13.3118	-15.2218	31.5182	9.01889	9.58816	6.89816	-9.02848	-9.88184	-5.81184	-11.1166	-10.4818	-12.7218	6.09816	5.27533	3.73283	-6.45184	-6.6392
gengepsip		-15.3473	607.678	-37.0016	68.1884	33.3484	42.4484	15.0184	12.6284	5.85837	-13.9816	-9.25163	19.4684	8.41653	6.66837	28.0484	4.23893	7.83837	4.55837	15.6384	0.0119932	-1.61163	6.79837	2.7918	3.21837	6.50837	6.29835	5.26285	0.918373	0.918183	-0.511627	-11.8846	-12.2316	-13.9316	32.4784	10.9538	11.7084	8.13837	-7.23498	-7.89163	-6.44163	-11.5572	-10.9316	-12.8316	5.68837	4.94121	3.36708	-3.81163	-3.99459
gensnngep		-27.4652	14.0622	97.6822	42.5222	60.2922	52.4622	6.31217	8.29217	5.89217	-20.7278	-2.18783	23.5322	12.51	9.84217	30.7522	6.19536	9.45217	3.35217	17.1822	1.59686	-1.13783	6.03217	2.20131	2.41217	9.76217	9.56404	8.52775	2.85217	2.85195	0.322172	-11.0889	-12.0978	-14.0178	31.4922	9.27683	9.21217	8.68217	-6.63284	-8.20783	-8.73783	-13.7121	-13.3178	-15.6478	4.39217	3.64994	2.06225	-11.5678	-11.7381
gepgepgeas		-3.62485	-174.491	-144.611	61.4991	51.9891	20.6191	13.0691	4.77907	1.73907	-14.4009	-7.98093	14.0791	2.25077	0.459069	23.3791	-3.25064	1.15907	5.82907	14.1791	-2.84653	-4.19093	6.95907	2.46624	3.07907	12.7291	12.5051	11.3993	5.84907	5.84881	-0.790931	-13.2782	-13.4509	-14.6609	32.8391	9.36048	10.5891	8.39907	-8.51899	-8.69093	-2.76093	-8.60107	-7.72093	-9.57093	9.10907	8.15077	6.63254	-0.350931	-0.543211
gepgepgebi		-1.345	-217.448	-122.088	38.622	38.572	-5.42801	14.872	4.42199	2.84199	-13.568	-8.28801	14.922	2.95398	1.06199	23.762	-4.00756	0.91199	8.49199	15.102	-2.28072	-3.56801	7.93199	3.3352	4.01199	15.982	15.7505	14.6547	11.322	11.3217	0.89199	-11.9216	-12.038	-13.298	33.242	9.06543	10.522	9.67199	-7.67968	-7.69801	-1.01801	-7.07778	-6.07801	-8.04801	11.472	10.4356	8.99139	0.15199	-0.0448396
gepgepgen		-11.9147	-120.975	-68.575	58.525	77.915	33.755	8.90498	6.30498	2.81498	-17.115	-4.69502	17.155	6.02614	3.99498	25.705	1.38957	4.90498	3.03498	13.655	-2.12301	-4.04502	5.58498	1.56351	1.94498	8.54498	8.33347	7.28728	0.374985	0.374785	-1.22502	-12.7326	-13.265	-15.225	31.685	9.76292	10.295	6.78498	-8.75365	-9.63502	-6.17502	-11.3433	-10.765	-12.915	7.31498	6.52217	4.96539	-6.19502	-6.37866
gepgepgesb		-3.58081	-214.532	-49.0724	40.9776	41.3176	6.6476	14.0476	4.9376	2.8876	-14.3924	-8.5524	14.8876	2.89395	1.0476	24.0076	-3.43978	1.2476	7.3676	15.1076	-2.24952	-3.5524	7.9376	3.32681	3.9876	15.4776	15.2515	14.1276	9.5976	9.59733	0.247601	-12.5209	-12.6624	-13.8624	33.3376	9.32686	10.6876	9.4176	-7.88137	-7.9524	-1.6124	-7.64836	-6.6924	-8.5724	10.5476	9.54734	8.03489	0.677601	0.484491
gepsnaspbsb		3.60108	-215.79	-319.91	4.10035	-27.5397	4.32035	14.6803	2.45035	4.58035	-8.46965	-0.579652	18.1803	5.26255	3.59035	25.7103	-5.73341	1.31035	9.91035	17.8103	-1.17805	-1.74965	10.2603	5.2428	6.18035	18.2703	18.021	16.9085	20.2103	20.21	6.84035	-7.29456	-6.85965	-8.39965	35.6003	8.70579	11.6003	13.6303	-5.44921	-4.53965	4.27035	-2.48824	-1.08965	-3.42965	7.29035	6.11033	4.74121	13.9903	13.7837
gepsnpgeas		-4.09938	-252.24	-206.62	36.2996	14.0196	27.9496	14.7096	6.16962	3.94962	-12.4904	-6.10038	16.8696	4.67831	2.97962	25.7496	-2.23581	2.92962	7.63962	16.3796	-1.25832	-2.33038	8.68962	4.03511	4.74962	14.5596	14.3333	13.2139	9.65962	9.65934	2.08962	-10.8942	-10.8504	-12.2104	34.6096	10.1277	11.8896	10.7096	-6.86487	-6.70038	-0.490385	-6.59546	-5.56038	-7.54038	9.56962	8.56705	7.06261	2.93962	2.74756
gepsnpgen		-9.01343	-142.477	-112.997	56.0932	30.4332	50.0732	12.9232	8.83321	6.31321	-10.2968	-2.58679	19.8232	8.03355	6.04321	27.9632	1.6231	6.09321	5.71321	15.7132	-1.07802	-2.79679	7.88321	3.64061	4.11321	11.5632	11.3534	10.2732	6.66321	6.66298	3.31321	-8.97436	-9.31679	-11.2468	34.5932	10.9672	12.1232	9.68321	-6.88269	-7.45679	-1.84679	-7.35898	-6.62679	-8.90679	10.2832	9.43582	7.86603	-1.53679	-1.71813
gesbgesbgeas		-4.09978	-90.7228	14.1772	38.9972	28.3872	-0.462845	12.6372	2.65716	3.43716	-14.1228	-10.6528	14.9472	2.32901	0.497155	23.4172	-6.80755	-0.632845	7.82716	15.1872	-3.29082	-4.23284	8.55716	3.67387	4.51716	21.4972	21.2572	20.1496	17.2372	17.2369	0.987155	-12.7088	-12.5428	-13.6228	32.5472	6.49401	8.74716	9.85716	-8.66133	-8.18284	-0.502845	-7.03012	-5.78284	-7.89284	9.18716	8.04914	6.65833	-0.702845	-0.905225
gesbgesbgebi		-2.66445	-133.6	69.9803	16.8803		-22.9397	14.8803	2.43034	5.06034	-12.6297	-11.2097	15.9403	3.21077	1.35034	24.0003	-7.44279	-0.439656	10.3503	15.9903	-2.77814	-3.54966	9.53034	4.57671	5.51034	23.8103	23.5598	22.4808	23.3303	23.33	2.74034	-11.263	-10.9497	-12.1397	33.0503	6.22334	8.96034	11.0103	-7.87072	-7.09966	1.21034	-5.5023	-4.10966	-6.38966	11.7003	10.4835	9.20055	-0.989656	-1.19867
gesbgesbgen		-10.4897	90.8826	124.833	45.5726	61.6626	18.2126	7.27263	4.79263	4.17263	-17.5074	-8.25737	18.0326	6.06624	3.49263	25.9426	-1.73235	2.42263	4.06263	14.5126	-2.78678	-5.03737	7.15263	2.71512	3.20263	15.3726	15.1484	14.0562	9.70263	9.70241	0.622635	-12.1018	-12.7974	-14.5674	32.1026	7.79926	8.27263	8.09263	-9.11062	-10.0274	-3.81737	-9.67626	-8.90737	-11.3474	6.78263	5.88309	4.28669	-5.97737	-6.16988
gesbgesbgep		-3.99574	-173.54	11.7795	29.9395	29.4895	-1.99046	13.8895	3.97954	3.81954	-14.2105	-9.94046	15.2295	2.82835	0.959542	23.9395	-5.34695	0.259542	8.32954	15.5195	-2.58317	-3.68046	8.65954	3.85145	4.62954	19.6495	19.4158	18.2911	15.2395	15.2393	1.07954	-12.3083	-12.2705	-13.3805	33.1395	7.80783	9.69954	10.0695	-8.04886	-7.78046	-0.530458	-6.91366	-5.77046	-7.78046	10.6295	9.54089	8.09124	0.319542	0.121532
gesbsnsbgeas		-1.87338	-154.7	127.53	14.1902	-1.90981	0.150195	15.2402	3.97019	5.11019	-10.5498	-8.52981	17.0502	4.15787	2.34019	25.3502	-5.96721	0.730195	9.43019	16.8302	-2.13212	-2.91981	10.2302	5.21205	6.13019	22.0102	21.7666	20.6478	21.9002	21.8999	3.84019	-10.2529	-9.95981	-11.1898	34.7202	7.9018	10.4802	11.8702	-7.17827	-6.46981	2.11019	-4.64074	-3.27981	-5.52981	9.59019	8.42417	7.03175	3.34019	3.13712
gesbsnsbgebi		-1.53499	-136.648	374.562	0.811658		-32.3983	15.7317	2.47166	5.43166	-11.1683	-9.51834	17.6517	4.67188	2.82166	25.5417	-6.87863	0.541658	11.4417	17.2917	-1.93172	-2.57834	10.7517	5.67028	6.66166	23.4217	23.1657	22.0782	25.5017	25.5013	4.79166	-9.57518	-9.15834	-10.4483	34.6017	7.12149	10.0917	12.4917	-6.88903	-5.92834	2.92166	-4.00404	-2.50834	-4.90834	11.4417	10.2053	8.91331	3.45166	3.24039
in3n3		-6.51434	-46.7545	-74.5445	41.5155	-10.3945	5.69546	3.13546	-3.02454	-0.174536	-17.2945	-15.7845	24.0555	13.1454	10.8755	26.9055	2.4523	6.55546	4.74546	17.0655	1.78173	-0.334536	5.61546	1.67834	1.90546	6.10546	5.63077	4.75047	10.1555	10.1547	14.6755	3.31853	2.66546	0.275464	31.5455	9.48329	10.3855	14.3355	-0.717336	-1.72454	3.15546	-1.93761	-1.47454	-3.94454	6.61546	4.91966	4.17739	-3.49454	-3.8896
in3o3		-12.1717	-10.5221	-37.0921	137.298	5.49792	16.2079	-0.942078	8.03792	1.43792	-12.3521	-14.1221	29.4979	20.9498	18.5679	31.5679	11.4428	14.7379	6.25792	21.4579	9.34408	7.04792	5.64792	2.72813	2.81792	4.01792	3.7676	3.04762	9.19792	9.19753	15.9379	6.91478	6.05792	2.13792	30.5779	12.5947	12.8779	17.1279	5.17601	3.91792	0.297922	-3.59486	-3.31208	-6.48208	7.75792	6.60185	5.93857	-8.64208	-8.84549
in3po3		10.9947			-0.103164	-58.1232	17.6968	15.5968	-9.69316	3.22684	2.54684	-5.29316	18.1468	2.81082	0.246836	24.0968	-16.6339	-6.02316	11.4568	17.9768	-4.96832	-5.74316	9.66684	3.87826	5.12684	16.1968	15.772	14.7972	19.7868	19.7864	14.3468	-3.01267	-2.43316	-2.68316	37.1768	3.14077	7.47684	16.8368	-6.3958	-4.98316	9.79684	1.62225	3.58684	1.00684	4.90684	3.05764	2.1791	2.89684	2.56198
in3s3		-1.24939	-19.4784	-104.568	34.8716	-39.1384	4.44158	4.65158	-0.508422	2.28158	-8.83842	-6.40842	20.8416	7.71455	5.78158	25.3816	-5.5889	1.02158	7.47158	17.6316	-1.301	-2.42842	6.73158	1.8306	2.58158	6.81158	6.46292	5.39781	11.0716	11.0712	13.6716	-0.392642	-0.258422	-1.13842	32.9716	5.82837	8.38158	15.3616	-3.50022	-3.19842	5.21158	-1.30089	-0.148422	-2.13842	3.61158	1.9228	0.979378	-0.788422	-1.0677
in3se3		2.35569	36.9941	34.5841	55.7841	-15.6059	34.7741	10.0541	-3.75595	2.57405	-2.31595	-6.44595	19.3141	5.42888	3.44405	24.3041	-9.76718	-1.81595	7.97405	17.3841	-2.92938	-3.76595	6.95405	1.75144	2.71405	10.8241	10.4474	9.43329	13.3241	13.3236	13.0041	-2.14476	-1.75595	-2.53595	33.7641	4.38342	7.65405	15.3541	-4.99559	-4.18595	5.81405	-1.23914	0.214051	-2.02595	1.95405	0.172371	-0.684939	0.794051	0.494441
in3te3		7.27286	70.902	-74.008	25.852	-71.178	9.63201	13.652	-8.21799	2.16201	0.642007	-9.21799	17.962	2.67859	0.352007	23.832	-15.2419	-5.69799	9.41201	17.932	-4.74866	-5.51799	8.44201	2.61156	3.78201	13.992	13.6034	12.5009	17.302	17.3016	13.272	-3.75884	-3.23799	-3.30799	35.892	2.85718	6.77201	16.402	-6.47806	-5.26799	8.11201	0.0520373	1.86201	-0.387993	1.01201	-0.753273	-1.83816	3.82201	3.51502
inninninp		-2.16882	-45.2886	-108.349	19.5614	-31.5486	-11.4186	6.2114	-4.7086	-0.538602	-15.5286	-12.7286	20.7414	8.7191	6.5814	24.3114	-3.05404	2.0214	6.2714	15.9414	-1.08825	-2.7986	6.1214	1.64242	2.0914	7.2414	6.77043	5.77289	11.4014	11.4005	13.4814	0.809378	0.481398	-0.928602	31.0714	6.73313	8.2514	13.8214	-3.05118	-3.5286	4.6414	-1.19126	-0.448602	-2.5186	4.8714	3.20113	2.23491	-0.328602	-0.727222
inninpinas		1.94999	-44.7027	-103.043	20.3873	-45.1627	-16.5027	10.3773	-6.46274	0.387259	-11.9027	-10.1427	18.3773	5.14589	3.11726	22.5573	-8.34861	-2.01274	9.19726	15.9973	-3.00698	-4.27274	8.12726	3.05929	3.76726	10.7373	10.2658	9.17434	15.2473	15.2461	12.9973	-1.17029	-1.13274	-1.39274	31.1473	4.09733	6.38726	14.3873	-4.56322	-4.39274	7.21726	0.538449	1.64726	-0.0127409	3.12726	1.38464	0.313149	5.15726	4.75654
inntlninp		2.01806	-125.793	63.3468	4.24679	-10.9332	-22.8332	5.33679	-6.80321	-1.67321	-14.1732	-7.79321	19.4168	7.61789	5.40679	22.5168	-4.68557	0.416792	5.61679	15.1768	-1.57751	-3.33321	5.68679	1.27567	1.70679	6.98679	6.49379	5.53842	11.5268	11.5258	14.0968	1.5904	1.21679	-0.463208	29.8168	5.74211	7.22679	13.7768	-2.84902	-3.33321	5.56679	-0.208518	0.536792	-1.69321	4.41679	2.70069	1.82206	2.88679	2.46991
inoinsinse		-4.26975	2.76964	-33.9804	80.2196	-20.2004	16.6696	3.22964	1.57964	2.40964	-7.68036	-10.3904	23.4496	11.6235	9.32964	27.2796	-0.984336	4.68964	6.20964	18.9496	1.8999	0.209644	6.30964	2.00551	2.54964	5.73964	5.42091	4.47375	10.2896	10.2893	14.4496	1.75622	1.46964	-0.410356	32.3696	7.58747	9.32964	16.0896	-0.881356	-1.19036	3.71964	-2.04788	-1.15036	-3.68036	3.53964	2.00362	1.15922	-3.54036	-3.7979
inotloins		-7.18807	-57.2316	-68.2316	116.688	4.08839	-7.20161	-0.401614	3.62839	1.69839	-11.2216	-10.7716	26.1584	16.3415	13.8784	28.7284	5.23662	9.43839	5.59839	20.2984	6.25315	4.10839	6.06839	2.58137	2.83839	5.06839	4.76886	3.96435	10.4784	10.478	15.5084	5.00884	4.29839	1.01839	30.4484	9.7434	10.5184	16.8884	2.94592	1.99839	2.42839	-2.24756	-1.73161	-4.73161	5.42839	4.05263	3.36393	-4.40161	-4.64335
inpinpinas		2.88381	-37.261	-206.191	20.299	-53.161	-24.181	16.159	-7.111	1.229	-11.411	-9.181	16.609	2.38187	0.548995	21.369	-12.1847	-4.761	13.559	16.379	-4.15518	-4.981	10.219	4.65258	5.579	15.969	15.4696	14.298	19.079	19.0776	11.739	-3.58398	-3.191	-2.361	30.829	1.57075	4.669	14.759	-5.76552	-5.041	8.779	1.4271	2.809	1.659	3.429	1.51142	0.440875	9.939	9.52335
inpinpinn		0.946101	-39.4292	-175.869	8.71083	-46.1892	-24.4992	10.6108	-5.95917	-0.459173	-14.0892	-10.8792	18.0708	4.96997	2.99083	22.2508	-7.94447	-1.89917	9.18083	15.4908	-3.23101	-4.52917	7.47083	2.45091	3.12083	10.4708	9.9977	8.88849	14.1508	14.1497	12.3108	-1.63267	-1.63917	-1.92917	30.5608	3.97738	6.16083	13.7308	-4.90293	-4.82917	6.33083	-0.238243	0.800827	-0.779173	4.12083	2.39177	1.2897	3.55083	3.14876
inpotlpobpo		24.0679			12.6995	-42.0105	6.2195	15.0495	-9.8505	4.8495	5.9495	5.2895	14.5095	-0.749124	-4.0005	21.2495	-18.4176	-9.2605	12.0595	17.1495	-5.4605	-7.3905	10.9295	5.40098	6.3795	18.5695	18.2046	17.1636	21.5695	21.5691	14.0495	-2.94512	-3.1005	-2.9905	38.1095	4.40853	7.3495	17.0795	-5.65322	-5.4105	12.7695	5.00674	6.5895	4.1195	7.0795	5.41043	4.32704	12.3795	12.0826
inpotlpointe		12.2714			3.19525	-55.7747	-5.53475	13.6853	-11.1947	2.04525	2.46525	-2.19475	16.9253	1.74409	-0.814748	22.3053	-17.8451	-7.57475	9.76525	17.4453	-5.25882	-6.07475	8.80525	3.04301	4.26525	15.1653	14.7304	13.7528	18.5953	18.5948	14.2653	-2.9036	-2.38475	-2.82475	35.3553	1.80848	5.94525	16.7153	-6.2762	-4.95475	9.93525	1.82143	3.73525	1.11525	2.56525	0.698072	-0.175018	6.12525	5.7826
inptlpinn		4.41102	-25.0094	-277.709	-23.8794	-44.7594	-37.8194	8.72055	-8.24945	-1.18945	-13.0494	-2.86945	16.5006	3.46353	1.34055	20.2806	-10.0893	-4.04945	8.01055	14.5206	-4.16028	-5.58945	7.39055	2.39111	3.04055	10.1706	9.68095	8.59578	14.5406	14.5394	12.9306	-1.01057	-1.09945	-1.43945	29.3706	2.74759	4.82055	13.5806	-5.03743	-5.04945	7.99055	1.4165	2.44055	0.780553	3.58055	1.80347	0.758463	7.78055	7.36565
insbinbiinp		6.38747	-21.6463	-149.226	14.1337	-60.2363	-27.4563	14.1437	-12.5263	-0.526261	-9.10626	-7.32626	14.8037	0.0508585	-1.90626	19.9137	-16.8387	-7.76626	11.3337	14.9137	-6.73123	-7.24626	9.72374	3.90845	5.05374	15.3837	14.8822	13.7599	19.4537	19.4522	10.7637	-5.52131	-4.86626	-3.84626	30.0937	-1.29353	2.68374	13.6237	-8.17303	-6.86626	8.80374	0.914979	2.65374	1.22374	0.633739	-1.3092	-2.30927	11.4337	11.0185
inseinseins		1.11523	20.0462	-7.47375	50.2362	-23.8538	24.3262	8.20625	-2.63375	2.41625	-4.46375	-6.55375	19.8062	6.16896	4.19625	24.6462	-8.38347	-0.913754	7.72625	17.4362	-2.42634	-3.37375	6.82625	1.71929	2.60625	9.38625	9.01997	7.98573	12.5062	12.5058	13.1962	-1.5954	-1.29375	-2.10375	33.4762	4.85261	7.85625	15.3262	-4.53803	-3.91375	5.54625	-1.33126	0.0162461	-2.12375	2.46625	0.715616	-0.174834	0.166246	-0.125944
inseinseinte		3.89473	49.0118	8.97184	46.0518	-34.2982	27.4118	10.9018	-5.38816	2.14184	-1.36816	-7.54816	18.7018	4.37264	2.28184	23.9718	-11.6735	-3.23816	8.22184	17.4018	-3.66691	-4.47816	7.31184	1.90213	2.93184	11.6118	11.2317	10.1865	14.4518	14.4514	13.0018	-2.74559	-2.30816	-2.85816	34.2818	3.7582	7.22184	15.5718	-5.58758	-4.64816	6.49184	-0.88931	0.68184	-1.54816	1.47184	-0.30515	-1.23875	1.51184	1.20994
insetlsebse		14.1612	-6.15244	68.0176	62.6176	-6.76244	19.9076	11.7676	-3.53244	3.84756	2.63756	-0.0724444	13.7976	0.0131856	-2.65244	20.0276	-12.6242	-6.50244	10.5476	15.6176	-4.33731	-6.41244	7.98756	3.05666	3.72756	13.5576	13.2297	12.1653	14.4876	14.4872	11.0576	-3.65019	-4.05244	-4.38244	34.5776	5.84652	7.43756	14.6476	-5.16292	-5.64244	8.21756	1.60738	2.64756	0.597556	4.68756	3.17191	2.02345	7.26756	6.99768
insetlseins		3.70778	-0.0391355	-197.769	48.4909	-18.8291	5.24086	6.43086	-4.29914	1.76086	-4.01914	-1.53914	18.6809	5.19676	3.10086	23.1109	-9.89024	-2.45914	6.50086	16.9309	-2.75442	-3.79914	6.50086	1.43856	2.31086	9.46086	9.07233	8.07353	13.1009	13.1004	13.5509	-1.14797	-0.929136	-1.97914	32.3809	3.9084	6.80086	15.3609	-4.35631	-3.79914	6.49086	-0.358716	0.980864	-1.31914	1.70086	-0.105766	-0.918086	2.71086	2.40219
insetlseinte		6.23889	-223.521	-316.521	33.9286	-30.3114	6.77858	9.54858	-6.79142	1.68858	-0.811419	-4.18142	17.9886	3.85878	1.66858	22.7986	-12.6768	-4.29142	7.06858	17.1186	-3.70028	-4.59142	7.08858	1.73727	2.74858	11.2986	10.894	9.89064	13.9586	13.9582	13.4286	-2.17109	-1.80142	-2.65142	33.1786	2.92626	6.29858	15.6986	-5.2404	-4.36142	7.26858	-0.064539	1.48858	-0.901419	0.828581	-1.00047	-1.85043	4.52858	4.20805
insinsinse		0.0517753	1.87948	-53.6905	43.5795	-31.7805	14.2995	6.50948	-1.50052	2.34948	-6.60052	-6.50052	20.3795	6.99338	5.03948	25.0795	-6.91774	0.0994828	7.63948	17.5795	-1.82458	-2.86052	6.78948	1.78215	2.59948	8.11948	7.76271	6.71111	11.8295	11.8291	13.4695	-0.962047	-0.750517	-1.60052	33.3195	5.4405	8.20948	15.3795	-3.99072	-3.53052	5.38948	-1.30879	-0.0605172	-2.13052	3.04948	1.33	0.410243	-0.220517	-0.505787
insinsinte		1.63301	5.05019	-94.2198	30.8902	-50.1998	6.72019	7.34019	-3.04981	2.18019	-5.49981	-7.81981	19.8702	6.02611	3.95019	24.8402	-8.71323	-1.26981	7.86019	17.6702	-2.50747	-3.53981	7.19019	1.96649	2.85019	8.80019	8.44089	7.3517	12.9902	12.9898	13.5402	-1.49802	-1.25981	-1.85981	33.9102	4.89499	7.82019	15.6502	-4.54716	-3.97981	6.10019	-0.933055	0.420185	-1.62981	2.56019	0.846775	-0.160845	0.530185	0.243145
instlsbs		11.5397	79.1577	32.5877	65.4477	-24.2123	-9.98233	7.89767	-0.24233	3.63767	-2.25233	0.0876697	14.6177	1.5771	-0.70233	20.5777	-8.86094	-3.71233	10.7177	15.2477	-3.34503	-5.29233	7.34767	2.71186	3.26767	10.7577	10.4495	9.37309	11.6877	11.6874	11.0677	-2.5461	-2.93233	-3.59233	33.9977	7.6112	8.91767	14.0277	-4.30748	-4.92233	7.20767	1.13694	1.97767	0.14767	6.80767	5.41566	4.20273	5.30767	5.05221
instlsino		-1.57024	-28.4999	-33.3299	43.1801	-18.4599	-6.3599	-0.2199	0.6901	1.6701	-8.6399	-2.8899	22.2001	10.7243	8.3301	25.7401	-1.61777	3.6401	4.3801	18.1001	1.59922	-0.2699	5.8101	1.63999	2.1001	3.8701	3.5406	2.61145	10.0201	10.0197	14.8901	2.59229	2.1601	0.0501004	31.4101	7.38269	8.8201	15.8701	-0.54301	-1.0699	4.8101	-0.76876	0.0201004	-2.5599	2.9201	1.36095	0.56463	-1.0499	-1.31482
instlsinse		2.05112	-108.366	148.984	24.5436	-25.5564	-6.22641	4.60359	-3.14641	1.76359	-6.19641	-3.40641	19.4036	6.22045	4.14359	23.7236	-8.11063	-1.16641	6.20359	17.0936	-2.05846	-3.20641	6.47359	1.5243	2.32359	7.61359	7.23313	6.21984	11.7936	11.7932	13.7136	-0.569286	-0.446406	-1.54641	32.0636	4.45109	7.09359	15.3436	-3.80494	-3.42641	6.12359	-0.527376	0.703594	-1.50641	2.34359	0.565344	-0.268326	2.10359	1.8005
inteinteins		4.45864	35.4943	-83.4057	27.6743	-60.9057	8.6543	10.2243	-5.6857	2.0843	-2.3957	-8.7357	18.8343	4.27466	2.0743	24.2543	-11.9933	-3.5757	8.4343	17.7043	-3.71744	-4.6357	7.7243	2.19044	3.2143	11.1343	10.7623	9.65998	14.9843	14.9839	13.3543	-2.66962	-2.3057	-2.6357	34.8043	3.8301	7.2143	15.9343	-5.59763	-4.7257	7.0343	-0.515102	1.0543	-1.0757	1.6243	-0.119462	-1.16945	1.9543	1.65851
inteinteinse		5.62562	60.7739	-26.8261	35.9639	-53.0661	19.3239	12.1939	-6.85612	2.05388	-0.39612	-8.48612	18.3039	3.49099	1.28388	23.8839	-13.4774	-4.49612	8.72388	17.6239	-4.26008	-5.05612	7.83388	2.20988	3.31388	12.6839	12.3005	11.2246	15.8039	15.8035	13.1139	-3.28082	-2.79612	-3.12612	35.0939	3.31159	7.00388	15.9439	-6.08528	-5.01612	7.26388	-0.46041	1.22388	-1.01612	1.13388	-0.63683	-1.64876	2.60388	2.3001
intetltebte		18.9884	-31.034	8.27604	40.946	-52.604	-3.11396	13.756	-8.54396	3.74604	3.61604	0.756038	13.496	-1.90061	-4.74396	20.516	-17.8137	-9.43396	10.686	16.776	-5.84266	-7.58396	9.62604	4.01858	4.97604	16.176	15.84	14.6902	18.366	18.3657	11.956	-4.87477	-4.93396	-4.64396	36.836	3.80548	6.58604	16.196	-6.434	-6.21396	10.496	2.8	4.28604	2.14604	3.23604	1.67342	0.372258	11.396	11.121
intetlteinpo		11.1147			3.79262	-66.3374	-8.99738	12.6026	-10.4074	1.87262	1.99262	-3.99738	17.1626	2.03033	-0.437385	22.5426	-16.9542	-7.08738	8.76262	17.5926	-4.97785	-5.78738	8.61262	2.84366	4.03262	13.6926	13.2701	12.2509	17.3826	17.3822	14.1526	-2.86963	-2.36738	-2.77738	35.1026	1.97596	5.96262	16.7026	-6.1262	-4.87738	9.62262	1.55856	3.41262	0.912615	0.932615	-0.910535	-1.84538	7.57262	7.23961
intetlteinse		9.25126	56.9516	206.212	29.0016	-49.5384	-3.02839	11.7816	-7.65839	2.35161	1.30161	-2.39839	18.1516	3.47033	1.16161	23.2616	-14.1095	-5.12839	8.68161	18.1416	-3.5976	-4.46839	8.51161	2.92678	4.02161	13.5116	13.1069	12.0677	17.2416	17.2412	14.4616	-1.86183	-1.43839	-1.98839	34.8716	3.21326	6.82161	17.0216	-4.89274	-3.86839	9.19161	1.48734	3.17161	0.79161	1.29161	-0.52871	-1.4671	6.60161	6.28176
pb3n3		-20.1996	-20.2982	228.072	45.2618	-11.3882	16.5618	4.89178	7.91178	5.84178	-12.1182	6.86178	25.9818	15.8035	12.5418	29.9018	4.88487	8.95178	4.52178	18.1118	3.52582	0.461777	5.98178	2.45521	2.59178	13.7818	13.5802	12.6474	16.7018	16.7014	7.99178	-2.97916	-4.20822	-7.80822	30.0718	8.10418	8.18178	12.0518	-2.43219	-4.09822	-2.71822	-7.50764	-7.11822	-10.4982	6.36178	5.45371	4.21056	1.14178	0.973157
pb3p3		10.8942	-323.475	-53.9547	-51.1047	-58.2747	-12.1347	14.4253	-0.784702	5.5353	-4.8047	9.0553	19.8953	7.11279	5.7353	25.7753	-5.70587	2.2553	11.3853	19.5753	0.856398	0.735298	10.7753	5.82768	6.8053	15.8953	15.6315	14.5453	20.9853	20.985	12.0253	-2.0127	-1.2547	-3.3547	35.7853	8.87227	12.6053	16.8653	-1.95193	-0.614702	8.6553	1.96853	3.4453	0.935298	6.8653	5.6064	4.36727	28.0453	27.8275
pbnpbnpbp		-11.1453	-122.239	152.001	-20.7887	-31.7087	4.07129	7.44129	4.72129	6.61129	-9.15871	7.26129	24.3613	13.0148	10.0313	28.8713	0.941748	6.12129	5.97129	18.8213	2.44391	-0.0687122	7.67129	3.60541	3.96129	13.7213	13.4985	12.4804	18.3613	18.361	9.76129	-2.54257	-3.36871	-6.05871	32.0813	7.75164	8.70129	13.8913	-2.43535	-3.44871	1.27129	-4.24793	-3.55871	-6.56871	5.78129	4.77085	3.43866	9.63129	9.44512
pbnpbnpbsb		-28.0116	-35.6483	-488.438	-27.0783	-48.3883	5.40175	3.68175	1.05175	5.60175	-11.6683	-3.49825	24.1217	11.787	8.88175	27.1217	-3.57669	2.27175	3.30175	19.3617	1.29244	-0.928253	7.40175	2.90863	3.36175	7.86175	7.58116	6.52367	8.38175	8.38138	8.88175	-4.62929	-5.26825	-4.60825	22.5517	-3.7017	-2.39825	13.9817	-4.11018	-4.76825	-0.748253	-6.89675	-6.04825	-7.67825	-5.62825	-6.58818	-8.1633	-4.25825	-4.50028
pbnsipgeas		-7.49657	124.241	118.121	48.9612	43.7412	26.2312	8.34123	6.25123	5.99123	-14.6388	0.92123	20.0812	8.06525	6.27123	27.9312	0.56447	5.82123	4.64123	17.3012	0.0756395	-1.23877	8.30123	3.94845	4.53123	10.3712	10.1503	9.09219	6.67123	6.671	3.71123	-8.93589	-8.98877	-10.7588	34.6012	10.3077	12.0612	11.2112	-5.84079	-5.96877	-1.54877	-7.25536	-6.35877	-8.55877	5.96123	5.10073	3.55691	3.62123	3.43103
pbnsipgen		-27.2009	194.875	224.535	35.8552	46.8352	28.7152	11.6052	9.43517	8.35517	-18.2648	-3.06483	24.3452	13.2565	11.2152	30.8352	6.02943	10.3252	4.75517	19.1552	3.45256	1.59517	6.70517	2.84369	3.20517	9.57517	9.37316	8.37752	3.28517	3.28496	1.18517	-10.3215	-10.7548	-12.6648	30.1752	7.81862	8.84517	10.5652	-4.87729	-5.65483	-8.29483	-13.3191	-12.7248	-14.9048	2.16517	1.43073	-0.088917	-6.82483	-6.99801
pbppbppbn		-1.39897	-223.162	58.6478	-32.8422	-47.4522	-4.68219	10.3578	1.84781	6.71781	-6.96219	7.64781	22.5578	10.2862	7.93781	27.7478	-2.48015	4.06781	8.07781	19.4378	1.60029	0.0978137	9.36781	4.80782	5.44781	14.2378	13.9949	12.9214	19.7078	19.7075	11.0678	-2.32084	-2.46219	-4.62219	34.0778	7.97295	10.1978	15.5278	-2.32603	-2.31219	4.99781	-1.18214	-0.122186	-2.83219	5.78781	4.66134	3.32148	18.2478	18.0458
pbpsingep		1.88621	178.809	56.8195	22.5995	-1.80055	36.9795	11.6595	7.51945	6.16945	-6.16055	5.73945	17.6495	5.46116	3.77945	25.9495	-1.32265	3.94945	5.49945	14.8195	-2.54384	-3.82055	7.77945	3.44248	4.01945	9.12945	8.9189	7.84658	6.18945	6.18923	5.76945	-6.92017	-6.93055	-8.48055	36.0295	11.541	13.3995	10.5395	-6.57329	-6.71055	1.81945	-3.82691	-2.96055	-5.03055	12.0795	11.2324	9.66917	8.58945	8.40683
pbsbsibigen		-16.9881	287.962	-178.268	-0.728359	-27.2184	-6.45836	14.2316	8.21164	7.54164	-14.2084	-13.0184	23.3216	11.0118	8.79164	29.6216	0.258501	5.77164	7.80164	19.4316	1.45829	-0.0983594	9.02164	4.40194	5.07164	14.5916	14.3579	13.2881	11.5316	11.5314	4.12164	-9.1785	-9.38836	-11.0384	31.2816	5.93695	7.46164	12.3416	-5.62982	-5.78836	-3.25836	-9.45476	-8.40836	-10.8284	4.09164	3.14187	1.61298	0.751641	0.552371
si3as3		0.94222	-36.8238	-144.334	78.2762	10.7962	82.3062	12.7762	18.2462	6.92623	-7.99377	-10.7838	17.0062	5.09052	3.67623	28.2262	1.49264	6.37623	5.02623	17.7062	0.543989	-0.303771	10.4462	5.88984	6.60623	11.1262	10.9049	9.80999	10.2962	10.296	1.71623	-10.862	-10.7038	-11.6138	39.7862	16.2387	18.0162	11.6562	-5.40629	-5.13377	-0.203771	-6.11605	-5.11377	-6.64377	11.0962	10.2003	8.64341	5.54623	5.35355
si3bi3		0.897493	-120.184	240.296	19.3764	-26.6036	23.8564	15.9364	11.0864	8.21636	-9.04364	-14.4736	17.5664	5.849	4.39636	26.5964	-2.50335	4.49636	12.6264	18.4464	1.18526	0.85636	12.2764	7.6313	8.54636	22.3764	22.131	21.1173	25.7364	25.7361	4.47636	-8.46444	-7.92364	-9.70364	36.4164	11.6573	14.7264	13.3464	-4.0479	-2.96364	3.70636	-2.58429	-1.21364	-3.41364	16.4464	15.2506	14.116	1.69636	1.49053
si3n3		-23.7084	4.03528	60.8553	136.075	90.6253	106.725	20.9153	16.3953	11.8253	-10.6547	4.19528	24.0253	12.9601	10.4253	32.5153	10.2746	12.5953	5.60528	18.5053	3.39855	0.205284	7.25528	3.78594	3.86528	4.58528	4.39816	3.43019	-3.66472	-3.66483	2.73528	-8.04064	-9.20472	-9.20472	36.4753	15.0363	14.3353	10.7253	-3.75973	-6.00472	-6.09472	-10.4155	-10.2547	-11.4947	8.32528	7.78218	6.11442	-4.30472	-4.46927
si3p3		0.927486	-390.895	291.065	55.775	17.405	74.355	14.315	21.975	6.74497	-7.97503	-10.005	15.635	4.34744	3.01497	27.745	3.62168	7.32497	2.98497	16.395	0.348811	-0.695029	8.14497	3.83366	4.40497	-0.595029	-0.806449	-1.91537	2.79497	2.79477	0.294971	-11.3943	-11.435	-12.345	39.795	18.2374	19.345	10.255	-5.61206	-5.72503	-2.21503	-7.68348	-6.90503	-8.15503	10.825	10.0574	8.39559	6.45497	6.26959
si3sb3		-4.58537	-216.758	-502.448	30.552	-18.418	58.962	14.952	14.342	9.11196	-10.068	-14.648	18.182	6.18368	4.76196	28.252	-0.291936	5.82196	9.54196	19.272	1.73693	1.23196	12.812	8.04573	8.91196	21.362	21.1341	20.0164	21.742	21.7417	3.11196	-9.91167	-9.50804	-10.828	37.832	13.2476	15.792	13.332	-4.25877	-3.46804	2.35196	-3.9734	-2.71804	-4.56804	14.322	13.2401	11.8492	4.10196	3.90785
siasgeassip		0.0129786	444.721	-165.379	61.4306	21.5906	50.7206	12.6206	14.1306	4.84055	-10.7694	-9.13945	15.8606	4.03714	2.48055	26.5906	0.158485	4.71055	5.11055	16.3706	-0.638935	-1.69945	9.12055	4.60715	5.27055	10.0906	9.86996	8.76613	7.98055	7.98032	0.800555	-11.6605	-11.6594	-12.6294	37.7606	14.448	15.9206	10.4306	-6.47034	-6.41945	-1.11945	-6.96502	-6.02945	-7.60945	10.1206	9.21994	7.65595	3.69055	3.49903
siasgeassisb		-1.78633	364.954	16.6444	52.8544	5.0544	46.7444	13.4144	12.5944	5.5644	-10.5556	-11.4856	16.6644	4.58034	3.0344	26.6244	-1.27929	4.0844	7.1344	17.2744	-0.265001	-1.1056	10.3044	5.6292	6.4044	16.9144	16.6881	15.5853	13.4544	13.4541	1.7144	-11.208	-11.0256	-12.0956	36.6644	12.3462	14.3244	11.4144	-6.09398	-5.6956	0.0943992	-6.04944	-4.9456	-6.7056	11.0344	10.0327	8.55855	3.6144	3.42
siasgeassnas		-1.40145	213.025	-103.055	53.8546	-2.02543	49.4146	13.1746	8.72457	5.75457	-9.89543	-7.77543	17.5246	5.03436	3.43457	26.7346	-2.41919	3.42457	7.15457	17.2746	-0.897873	-1.70543	10.0446	5.26684	6.08457	16.7246	16.4942	15.3915	13.8546	13.8543	3.17457	-10.2253	-9.98543	-11.1854	36.5646	11.2121	13.4346	11.7746	-6.37234	-5.87543	0.964567	-5.3532	-4.17543	-6.15543	8.69457	7.65751	6.19418	4.87457	4.67889
siassiassibi		1.50724	-65.0148	-35.5748	65.8252	0.775248	54.9352	14.1152	15.9452	7.20525	-8.46475	-11.2848	17.2452	5.38259	3.90525	27.7452	0.235798	5.65525	8.12525	18.2052	0.971248	0.225248	11.3252	6.71778	7.49525	16.2952	16.0687	14.9896	15.3952	15.395	2.65525	-10.0615	-9.83475	-10.9948	38.7852	14.8668	16.9352	12.4352	-4.78472	-4.30475	1.23525	-4.82984	-3.71475	-5.44475	13.3152	12.323	10.8841	4.40525	4.21008
siassiassin		-2.65311	0.392445	-61.8776	102.852	32.9424	90.2824	13.1324	17.1524	9.90245	-8.95755	-5.47755	20.0324	8.37234	6.94245	30.4024	5.30375	9.69245	4.37245	17.0724	0.561765	-0.617555	10.0524	5.87089	6.43245	5.25245	5.0361	4.01395	3.80245	3.80229	2.94245	-9.03236	-9.03755	-10.2776	39.9124	17.1768	18.6024	10.6524	-5.57341	-5.77755	-1.22755	-6.57621	-5.77755	-7.46755	10.3324	9.60632	8.00136	3.39245	3.20425
siassiassip		1.19089	-143.881	-7.95118	71.1688	11.4488	75.3688	13.4088	19.8488	6.90882	-7.82118	-10.3612	16.5788	4.84061	3.42882	28.1488	2.2293	6.68882	4.34882	17.2988	0.459829	-0.481181	9.67882	5.19551	5.85882	6.87882	6.66096	5.55836	7.78882	7.7886	1.28882	-11.0239	-10.9512	-11.8312	39.9688	17.0349	18.5488	11.2288	-5.48241	-5.36118	-0.861181	-6.63583	-5.71118	-7.14118	11.0888	10.2425	8.63678	5.94882	5.75854
siassiassisb		-0.11615	-85.1346	-278.455	63.6454	0.365448	73.2454	13.4654	16.7654	7.32545	-8.77455	-11.6546	17.3054	5.38476	3.94545	28.1354	0.885388	6.07545	6.71545	18.2554	0.994028	0.235448	11.2854	6.6537	7.41545	14.9354	14.7133	13.6067	13.9154	13.9152	2.19545	-10.5095	-10.2946	-11.3546	39.1254	15.3235	17.2754	12.2654	-4.95429	-4.53455	0.715448	-5.33915	-4.25455	-5.88455	12.1854	11.2307	9.71914	5.40545	5.21327
siassisbsibi		-0.306102	-125.57	-140.59	47.2803	-10.9597	47.3403	14.7603	14.5303	7.88026	-9.18974	-12.6997	17.6203	5.73242	4.26026	27.7303	-0.384836	5.47026	9.54026	18.6603	1.31115	0.690264	12.0303	7.35721	8.18026	19.3703	19.1416	18.0566	19.1803	19.18	3.10026	-9.76113	-9.43974	-10.7597	38.1203	13.8473	16.1903	12.9303	-4.45488	-3.79974	2.02026	-4.17715	-2.97974	-4.81974	14.3203	13.2659	11.8858	3.96026	3.76461
sibigebisisb		-0.680795	283.384	555.814	23.6437		10.0637	15.3737	8.68372	7.05372	-10.4663	-13.1263	16.9937	4.89664	3.28372	25.8437	-4.02079	2.85372	11.4237	17.6737	-0.143671	-0.666281	11.3437	6.57565	7.48372	22.5137	22.2688	21.2185	24.7837	24.7834	3.68372	-9.63913	-9.20628	-10.7063	35.5037	10.0494	12.9137	12.5337	-5.40496	-4.48628	2.68372	-3.76132	-2.39628	-4.57628	14.3937	13.2042	11.9848	0.683719	0.478369
sibisibisias		1.43891	-95.1587	103.631	45.4813		32.4013	15.2813	13.5313	7.67131	-8.87869	-12.4587	17.4613	5.66097	4.16131	27.2113	-1.09887	5.02131	10.8213	18.4713	1.19997	0.631314	11.9413	7.30314	8.14131	20.2113	19.9775	18.9245	20.5813	20.581	3.57131	-9.27011	-8.90869	-10.3687	37.6613	13.3249	15.8213	13.0113	-4.32329	-3.57869	2.51131	-3.6817	-2.44869	-4.39869	15.2713	14.1771	12.8803	3.05131	2.85221
sibisibisin		1.84853	-14.5025	194.578	77.0975		66.3575	15.2075	15.9375	11.2375	-9.00247	-5.21247	21.1375	9.36318	7.30753	30.5575	3.61014	8.21753	10.5175	18.2875	1.30801	-0.342465	12.3175	7.96403	8.54753	14.4175	14.1931	13.1598	13.5775	13.5774	5.56753	-6.89489	-7.19247	-8.79247	40.2475	16.5208	17.6075	12.4875	-4.37546	-4.78247	2.24753	-3.48052	-2.60247	-4.69247	15.6775	14.8438	13.2883	2.07753	1.88601
sibisibisip		1.87643	-210.202	232.828	38.1183		29.0383	16.6483	15.9883	8.49827	-8.52173	-11.4517	17.5383	5.91764	4.38827	27.5983	0.140843	5.69827	11.0483	18.5983	1.63785	0.918273	11.7883	7.21226	7.98827	17.2683	17.0399	15.9709	18.2583	18.258	3.54827	-9.02724	-8.80173	-10.2017	38.2583	14.5818	16.6983	13.0583	-3.94244	-3.41173	2.31827	-3.74891	-2.61173	-4.43173	16.1783	15.1379	13.7744	4.33827	4.14304
sibisibisisb		-0.882694	-164.478	19.5324	24.1724		29.4124	15.7324	12.2824	8.60237	-9.31763	-14.3976	17.8424	6.00952	4.55237	27.2424	-1.72605	4.97237	11.7324	18.8224	1.43533	1.03237	12.5224	7.83079	8.73237	22.2524	22.0135	20.9628	24.4724	24.4721	4.06237	-8.92949	-8.43763	-10.0476	37.0224	12.2741	15.1524	13.4224	-4.07172	-3.09763	3.29237	-3.019	-1.68763	-3.77763	15.9024	14.7454	13.5205	2.44237	2.24088
singensip		-17.3936	681.476	35.7862	93.6962	45.5662	65.4962	16.6362	13.5962	9.21624	-12.1838	-3.72376	21.5062	10.358	8.96624	29.9662	6.64129	10.7562	4.15624	16.4662	0.94952	-0.42376	6.32624	2.55405	2.95624	3.84624	3.65161	2.68292	-1.40376	-1.4039	0.53624	-10.6608	-10.7638	-12.1838	33.7462	12.0613	13.4062	8.72624	-6.36531	-6.88376	-7.25376	-12.0218	-11.4238	-13.1738	5.08624	4.44584	2.89628	-4.90376	-5.0728
singensnn		-29.87	420.985	-17.9355	87.1045	47.6345	86.2345	11.6045	14.7245	10.0145	-14.8355	3.21455	26.9545	16.4135	13.2545	33.8645	11.1467	13.2845	5.45455	18.7645	4.09533	0.444546	7.37455	3.94255	3.92455	11.3945	11.2125	10.2256	2.02455	2.02437	3.37455	-7.26554	-8.81545	-10.3455	34.0645	12.9338	11.7545	10.3345	-3.91432	-6.44545	-7.23545	-11.6375	-11.5455	-13.6955	8.59455	7.97696	6.36488	-9.77545	-9.93416
singepsnas		-3.24429	194.365	52.2048	77.7248	10.2348	60.8848	12.5048	10.8048	8.54483	-6.96517	-1.20517	19.8448	7.71781	5.96483	28.6548	1.59805	6.58483	5.49483	16.0948	-1.19489	-2.58517	9.19483	4.85237	5.41483	10.3948	10.1826	9.11202	7.68483	7.68462	4.95483	-7.6706	-7.76517	-9.45517	37.4748	13.1912	14.8148	10.6848	-6.36453	-6.61517	0.574827	-5.0701	-4.22517	-6.37517	11.7848	10.9559	9.36889	2.73483	2.55046
sinsinsias		-7.57573	2.03536	-3.13464	116.315	52.2754	95.8354	16.2254	15.8954	10.9154	-9.07464	1.06536	21.4654	9.71987	8.66536	31.0954	6.61645	11.5154	5.04536	17.1454	0.803089	-0.124641	8.43536	4.50726	5.03536	3.83536	3.63965	2.67079	0.175359	0.175239	3.07536	-8.67828	-8.43464	-9.57464	38.9654	16.1129	18.1754	10.3854	-5.48221	-5.55464	-3.29464	-8.2612	-7.51464	-9.13464	9.61536	8.97773	7.40892	-0.0846409	-0.254161
sinsinsibi		-0.533805	-1.72196	133.548	98.948	48.048	88.608	17.318	17.138	12.058	-8.19196	3.36804	21.578	10.106	8.85804	31.008	6.42668	11.198	8.48804	17.478	1.33525	0.308036	9.84804	5.90619	6.42804	8.66804	8.47912	7.51034	5.09804	5.09791	4.45804	-7.21127	-7.08196	-8.80196	40.008	17.4761	19.308	11.208	-4.57171	-4.68196	-1.11196	-6.16549	-5.39196	-7.29196	13.068	12.3764	10.869	-0.0719638	-0.233874
sinsinsip		-10.4064	-131.83	152.34	112.95	60.9804	99.2604	16.9604	15.4404	10.6104	-9.65961	0.430386	21.0204	9.31105	8.19039	30.7904	6.75318	11.3304	4.26039	16.8304	0.631906	-0.479614	7.49039	3.5991	4.08039	1.17039	0.975426	-0.0080437	-2.17961	-2.17973	2.34039	-9.28818	-9.15961	-10.0096	38.2904	15.6669	17.4704	9.93039	-5.75383	-6.03961	-4.30961	-9.19351	-8.51961	-9.95961	9.17039	8.5577	6.94623	-0.569614	-0.739184
sinsinsisb		-2.95335	43.2368	-75.1932	96.3568	37.5468	100.727	16.1168	17.0268	11.5668	-9.07319	1.90681	21.2468	9.70567	8.57681	30.8368	6.41961	11.1968	6.46681	17.1168	0.942967	0.00680709	9.15681	5.19516	5.72681	6.16681	5.97885	4.99538	3.17681	3.17668	3.71681	-7.95739	-7.76319	-9.35319	39.4568	16.9474	18.8668	10.6868	-5.09491	-5.14319	-2.07319	-7.11699	-6.34319	-8.15319	10.8268	10.1634	8.61182	0.816807	0.655107
sinsipsias		-3.39202	-123.408	84.7618	97.8418	36.3518	87.3418	13.9918	17.6818	9.7118	-9.0982	-5.2782	19.6218	8.09052	6.8418	30.2018	5.74969	10.0818	3.8818	16.7618	0.513218	-0.518202	9.2018	5.08025	5.6318	2.3618	2.14919	1.12746	1.5618	1.56165	2.3718	-9.39058	-9.3082	-10.5682	39.6418	17.3515	18.8818	10.2618	-5.67047	-5.7982	-2.0682	-7.30231	-6.5282	-8.1182	10.3918	9.69437	8.0813	3.3218	3.13648
sinsnpgesb		-11.0407	174.09	-30.4796	42.7604	14.3604	33.2804	8.11035	9.08035	7.88035	-16.0996	-4.08965	21.2804	9.15218	7.19035	29.8604	2.33193	7.20035	4.69035	17.7104	0.297353	-1.24965	9.03035	4.58223	5.16035	10.3304	10.1155	9.01817	6.49035	6.49012	3.20035	-9.57073	-9.77965	-11.3896	35.9904	11.6082	12.9804	10.9804	-6.27451	-6.60965	-2.17965	-8.00464	-7.12965	-9.29965	8.39035	7.54974	5.92198	0.590353	0.406073
sipgeassnsb		-0.592628	159.494	195.904	36.6237	-9.82631	30.9237	14.9737	9.91369	6.09369	-9.25631	-7.63631	17.9237	5.56624	3.89369	27.2437	-1.6712	3.96369	8.50369	17.8437	-0.157544	-1.05631	10.7337	5.9413	6.73369	16.1737	15.9459	14.8165	16.1337	16.1334	3.98369	-9.31294	-9.15631	-10.4263	37.2837	12.22	14.2737	12.4837	-5.51945	-5.10631	1.98369	-4.35142	-3.19631	-5.15631	10.0237	8.9877	7.49454	6.01369	5.8209
sipgepsias		-1.4325	297.015	141.035	64.2945	14.3845	56.1945	13.8545	15.4545	5.68455	-10.0655	-9.76545	15.4745	3.85456	2.35455	26.3645	0.81134	5.00455	4.61455	15.9145	-0.72809	-1.82545	8.38455	3.95596	4.57455	6.97455	6.75787	5.65132	5.17455	5.17432	0.20455	-11.9583	-11.9955	-13.0155	37.1045	14.4523	15.7445	9.88455	-6.6185	-6.66545	-1.93545	-7.62944	-6.76545	-8.28545	10.9045	10.0488	8.45296	4.29455	4.10604
sipgepsin		-2.00201	391.587	165.277	73.9667	48.4267	71.0267	9.33665	11.9967	6.74665	-11.9133	-0.79335	17.2267	5.7182	4.30665	27.8467	3.45898	7.60665	2.42665	14.5067	-1.67553	-2.93335	7.44665	3.36213	3.85665	2.11665	1.90625	0.86928	-1.11335	-1.11351	1.22665	-10.4901	-10.5533	-12.0233	38.3567	16.0483	17.3767	8.48665	-7.36119	-7.70335	-2.57335	-7.75687	-7.05335	-8.78335	12.0567	11.3525	9.72775	1.03665	0.85264
sipgepsnp		-2.769	29.9912	106.221	43.2912	-0.618814	46.6012	15.6712	11.7112	6.17119	-10.1488	-5.67881	17.8812	5.95816	4.43119	27.7512	1.0328	5.77119	7.47119	17.5212	0.383556	-0.618814	9.68119	5.1272	5.79119	9.87119	9.65535	8.52102	8.19119	8.19093	2.88119	-9.69486	-9.64881	-10.9588	37.4812	13.9297	15.5612	11.7112	-5.31877	-5.20881	0.251186	-5.65214	-4.70881	-6.44881	11.1812	10.2691	8.68484	6.10119	5.91608
sipsingen		-17.4102	681.465	35.7451	93.6851	45.5451	65.4851	16.6251	13.5851	9.20513	-12.2049	-3.73487	21.4951	10.3468	8.95513	29.9551	6.63009	10.7451	4.13513	16.4551	0.938377	-0.434873	6.30513	2.53295	2.93513	3.82513	3.6305	2.66182	-1.42487	-1.42501	0.525127	-10.672	-10.7749	-12.2049	33.7351	12.0501	13.3951	8.71513	-6.37645	-6.89487	-7.27487	-12.0429	-11.4449	-13.1949	5.07513	4.43476	2.88518	-4.91487	-5.08391
sipsipsias		1.0436	-262.318	135.972	63.9223	13.5823	72.5323	13.9023	21.0223	6.84233	-7.92767	-10.1777	16.0823	4.57623	3.19233	27.9223	2.92245	6.97233	3.72233	16.8423	0.40776	-0.59767	8.94233	4.54546	5.16233	3.15233	2.93774	1.83083	5.24233	5.24212	0.79233	-11.2017	-11.1977	-12.0877	39.8623	17.6378	18.9223	10.7423	-5.53951	-5.54767	-1.50767	-7.12795	-6.27767	-7.60767	11.0223	10.2152	8.57969	6.26233	6.07458
sipsipsibi		2.16182	-299.495	250.335	49.9752	6.04516	47.0152	15.8252	19.7252	7.90516	-7.94484	-10.0748	16.7252	5.2368	3.72516	27.8952	2.07914	6.50516	7.44516	17.8152	1.24256	0.255161	10.3352	5.86976	6.52516	8.95516	8.73699	7.63559	10.6052	10.6049	2.07516	-10.0932	-10.0748	-11.1648	39.4252	16.8048	18.2352	11.9652	-4.54235	-4.43484	0.305161	-5.48839	-4.55484	-6.04484	13.8852	12.9911	11.4448	5.82516	5.63617
sipsipsin		-4.06159	-255.52	239.5	90.8297	42.0897	89.9097	14.6697	17.8897	9.37975	-9.30025	-5.16025	18.9797	7.57664	6.51975	29.7797	5.96596	10.2697	3.26975	16.2697	0.28574	-0.58025	8.24975	4.18741	4.73975	-0.62025	-0.82951	-1.84896	-0.75025	-0.7504	1.69975	-9.85185	-9.67025	-10.9403	39.2297	17.3761	19.0497	9.73975	-5.89703	-5.92025	-2.93025	-8.05137	-7.29025	-8.79025	10.1897	9.51933	7.90277	3.14975	2.96688
sipsipsisb		0.872559	-319.619	62.2308	46.0808	0.540821	63.4708	14.8408	20.2708	7.75082	-8.29918	-10.5192	16.5408	5.00421	3.56082	28.0608	2.52244	6.77082	5.79082	17.6208	1.04211	0.0608211	10.0408	5.55637	6.20082	7.03082	6.8166	5.6914	9.07082	9.07059	1.50082	-10.6449	-10.6292	-11.6392	39.6508	17.1605	18.5208	11.6008	-4.88467	-4.80918	-0.329179	-6.10539	-5.19918	-6.60918	12.4008	11.5445	9.93166	6.64082	6.45438
sisbgesbsias		-2.76918	372.414	-488.486	48.0139	3.96386	44.5639	12.9339	10.5339	6.54386	-11.7061	-12.0161	16.4939	4.32631	2.73386	26.3039	-2.34686	3.41386	7.79386	17.3239	-0.424036	-1.19614	10.8939	6.13141	6.94386	19.5639	19.3349	18.2197	17.6639	17.6636	1.91386	-11.2203	-10.9861	-12.1361	36.3739	11.5891	13.7839	11.6139	-6.15576	-5.62614	0.953864	-5.35024	-4.16614	-6.01614	11.7639	10.7016	9.2682	2.77386	2.57842
sisbgesbsibi		-3.09243	187.41	-669.77	14.5397		17.8797	15.1597	9.57973	7.61973	-10.7103	-13.9603	17.3497	5.13486	3.56973	26.4997	-3.1985	3.41973	10.5097	17.9697	0.0303019	-0.520268	11.6597	6.85137	7.74973	22.6397	22.4014	21.3184	22.6697	22.6694	3.32973	-10.0343	-9.62027	-10.9603	35.8197	10.3876	13.1197	12.5397	-5.48823	-4.63027	2.33973	-4.11633	-2.79027	-4.85027	14.2597	13.1082	11.808	2.03973	1.8388
sisbsisbsias		-2.09203	-145.646	-398.896	47.4836	-9.49636	64.8036	14.1336	15.3836	7.99364	-9.58636	-13.0364	17.6436	5.69814	4.25364	28.0836	0.236486	5.83364	8.21364	18.7136	1.33273	0.683636	12.0136	7.3129	8.12364	18.3736	18.1496	17.0351	17.6936	17.6934	2.57364	-10.2764	-9.98636	-11.1764	38.3836	14.2391	16.4436	12.7536	-4.63707	-4.04636	1.48364	-4.70737	-3.54636	-5.27636	13.2336	12.2161	10.7607	4.84364	4.65117
sisbsisbsibi		-2.78086	-196.115	-232.135	28.1145	-22.1355	42.4745	15.3445	13.3245	8.85454	-9.70546	-14.5255	18.0045	6.08291	4.63454	27.7445	-1.02816	5.37454	10.6345	19.0445	1.57296	1.11454	12.6545	7.9238	8.80454	21.8445	21.6115	20.5263	23.0845	23.0842	3.56454	-9.4502	-9.00546	-10.4655	37.4245	12.7448	15.4445	13.3645	-4.18861	-3.31546	2.78454	-3.53678	-2.24546	-4.20546	15.1245	14.0055	12.6957	3.22454	3.02693
sisbsisbsin		-1.63713	5.4108	-250.959	71.5608	11.6608	89.0308	13.4408	17.1208	11.0408	-10.1192	-6.7392	20.7008	8.92633	7.0308	30.6808	4.44418	8.7108	7.2508	17.9308	1.06065	-0.519198	11.7308	7.36633	7.9308	11.0008	10.7851	9.71	10.3808	10.3806	4.1908	-8.13735	-8.4092	-9.8292	40.1508	16.8361	17.8408	11.7408	-4.96297	-5.3992	0.810802	-4.85433	-4.0292	-5.9192	12.5308	11.7525	10.1015	3.8308	3.64528
sisbsisbsip		-1.55396	-264.406	-201.626	37.9136	-10.6764	56.7636	15.0536	17.4736	8.56358	-9.41642	-12.1964	17.4636	5.72424	4.26358	28.2036	1.27263	6.31358	8.15358	18.5836	1.55883	0.773581	11.6336	7.00376	7.74358	14.8736	14.6542	13.5267	15.1536	15.1533	2.41358	-10.1416	-9.96642	-11.1264	38.7436	15.313	17.1636	12.5936	-4.4179	-4.03642	1.18358	-4.86919	-3.80642	-5.41642	13.7636	12.7978	11.2831	5.97358	5.78444
sn3as3		-2.41923	8.52715	-41.4828	16.0772	-58.6928	54.9772	16.1472	6.63715	8.20715	-7.61285	-5.74285	21.3372	8.17728	6.57715	29.2272	-2.83021	4.55715	9.74715	19.4572	0.120715	-0.322845	11.7872	6.69255	7.68715	18.6672	18.418	17.3048	22.0972	22.0968	7.58715	-6.80852	-6.26285	-7.81285	37.8372	10.3879	13.5572	14.4372	-4.98749	-3.92285	4.25715	-2.60805	-1.14285	-3.55285	6.77715	5.58453	4.21677	9.03715	8.83018
sn3bi3		5.47152	-83.1458	180.684	-21.0458	-80.4658	-52.5558	21.0442	2.59419	8.02419	-4.65581	-6.32581	21.3742	8.12329	6.26419	28.5142	-6.14966	2.71419	16.4242	20.0342	0.175893	-0.0958072	13.9442	8.69055	9.84419	24.3742	24.0907	23.0593	35.6242	35.6239	10.5542	-4.44487	-3.74581	-5.49581	38.1942	9.35497	13.1642	16.1742	-3.98663	-2.46581	8.20419	0.885393	2.65419	-0.165807	13.8942	12.526	11.4007	11.6442	11.4148
sn3n3		-39.7852	156.878	-68.0722	86.9778	2.29781	116.218	10.1778	19.4678	12.0478	-15.8722	-2.71219	33.2278	22.7509	19.1978	38.7978	14.4247	17.1978	7.88781	22.7378	7.87941	4.15781	9.88781	6.32072	6.31781	16.6178	16.4373	15.4136	14.1678	14.1675	6.96781	-4.03389	-5.68219	-8.26219	34.9978	13.1214	12.1678	13.4778	-1.15795	-3.56219	-6.01219	-10.7387	-10.5622	-13.4222	9.50781	8.75635	7.22135	-12.0522	-12.2058
sn3p3		-5.55609	-55.5986	171.591	31.3114	-58.3486	65.4214	17.6314	9.26143	9.11143	-8.64857	-2.49857	22.9814	10.1939	8.58143	31.2914	1.12193	7.54143	11.0314	20.8214	2.25223	1.53143	12.5414	7.61917	8.45143	14.5714	14.3396	13.1727	17.4914	17.4911	8.17143	-5.60879	-5.27857	-6.85857	39.2514	13.067	15.6914	15.3414	-3.22424	-2.58857	4.41143	-2.11401	-0.878566	-3.05857	9.81143	8.73624	7.22028	9.89143	9.69764
sn3sb3		-1.15655	-101.005	-128.505	-34.7651	-78.3751	-16.9251	18.4949	5.00494	8.05494	-7.14506	-7.25506	21.6249	8.21781	6.43494	29.4249	-4.4744	3.56494	13.0749	20.5149	0.556905	0.174935	13.7149	8.36813	9.46494	23.4349	23.1745	22.0343	31.6349	31.6346	8.98494	-5.98261	-5.38506	-6.88506	38.4249	9.95051	13.3349	15.8849	-4.30791	-3.01506	6.54494	-0.772685	0.874935	-1.65506	10.5249	9.24874	7.9033	12.0149	11.802
snaspbassnp		1.93642	-204.072	135.248	0.128219	-58.7418	31.6482	15.3382	3.72822	6.49822	-7.12178	-0.121781	20.0782	7.01723	5.50822	27.3082	-4.61248	2.98822	9.78822	18.7382	-0.436951	-0.751781	10.7482	5.69434	6.68822	16.7982	16.5449	15.4396	21.0282	21.0279	8.41822	-5.88663	-5.25178	-6.98178	36.5482	9.23306	12.6082	14.5382	-4.72821	-3.56178	5.10822	-1.70844	-0.231781	-2.67178	5.81822	4.60396	3.27701	15.3382	15.1283
snaspbsbsibi		4.35498	-192.518	-610.008	-20.1278		-4.53783	14.7922	3.69217	5.48217	-7.49783	-5.53783	19.3322	6.30741	4.76217	26.9822	-5.57988	2.32217	11.1222	19.0422	-0.273518	-0.497828	11.7422	6.63511	7.70217	19.8922	19.6318	18.5613	22.2722	22.2719	7.92217	-6.51495	-5.82783	-7.32783	36.6122	9.09272	12.5522	14.8022	-4.68677	-3.33783	5.44217	-1.53161	0.0721721	-2.32783	9.87217	8.64094	7.37186	15.4522	15.2379
snassnassnbi		0.516836	-20.2304	29.2896	-0.0103917	-70.9604	8.25961	17.4396	5.16961	7.66961	-6.80039	-5.85039	21.2196	8.04911	6.31961	28.8796	-3.94416	3.74961	11.7396	19.5696	0.0730083	-0.380392	12.3796	7.22609	8.25961	20.8296	20.5704	19.4783	26.5496	26.5493	8.48961	-6.08434	-5.54039	-7.16039	37.9296	10.1191	13.3496	14.9496	-4.71093	-3.57039	5.49961	-1.52064	0.0296083	-2.52039	9.01961	7.76853	6.47114	9.84961	9.63592
snassnassnn		-17.0415	97.032	-46.198	36.222	-38.848	72.442	12.952	10.212	11.582	-10.138	-7.26795	26.502	13.5913	11.242	33.582	2.64393	8.84205	7.64205	21.022	2.28964	0.662047	11.542	6.78882	7.46205	15.592	15.365	14.2401	19.032	19.0317	7.99205	-5.91829	-6.10795	-7.71795	37.502	10.5303	12.502	14.402	-4.28052	-4.41795	1.00205	-5.37348	-4.30795	-6.84795	6.29205	5.27712	3.72775	0.962047	0.770917
snassnassnp		-3.21708	-5.79592	21.2541	19.2541	-59.4759	57.3841	16.6641	7.67408	8.61408	-7.86592	-4.62592	21.8841	8.8663	7.28408	29.9341	-1.43939	5.61408	10.1841	19.9241	0.865744	0.354084	12.0641	7.02912	7.97408	17.1341	16.891	15.7607	20.5341	20.5338	7.83408	-6.33814	-5.85592	-7.44592	38.3641	11.3916	14.3941	14.7741	-4.34392	-3.40592	4.38408	-2.36357	-0.975916	-3.31592	7.77408	6.62198	5.2058	9.36408	9.16164
snassnassnsb		-1.62059	-18.1256	-79.2356	-0.485551	-66.3256	29.3244	16.6544	5.94445	7.76445	-7.51555	-6.18555	21.2944	8.086	6.40445	29.1544	-3.40598	4.08445	10.6444	19.6744	0.176299	-0.285551	12.3044	7.12901	8.14445	20.0744	19.8223	18.6981	25.0744	25.0741	7.99445	-6.55498	-6.02555	-7.58555	37.9844	10.2967	13.4544	14.8144	-4.8238	-3.72555	4.97445	-2.03424	-0.515551	-2.97555	7.83445	6.61595	5.25073	10.0444	9.83587
snassnsbsnbi		0.949906	-51.8775	-18.1275	-16.3575	-78.2775	-13.8975	18.3225	4.62255	7.69255	-6.58745	-6.39745	21.3525	8.09254	6.31255	28.9725	-4.49585	3.46255	12.9325	19.9325	0.222629	-0.197451	13.0525	7.81513	8.89255	22.2925	22.0296	20.9295	29.7425	29.7422	8.97255	-5.80013	-5.22745	-6.82745	38.1525	9.96991	13.3125	15.4425	-4.47931	-3.24745	6.27255	-0.899331	0.712549	-1.86745	10.2925	9.0133	7.72547	10.8525	10.6369
snbisnbisnas		3.07184	-50.1669	99.4331	-9.15693	-78.8669	-27.5469	18.9831	3.66307	7.49307	-5.91693	-6.12693	21.0931	7.87439	6.06307	28.5131	-5.22492	2.98307	13.9031	19.6231	-0.0730464	-0.466926	12.9831	7.77074	8.86307	22.5731	22.303	21.237	30.9431	30.9427	9.35307	-5.44127	-4.84693	-6.51693	37.9431	9.62833	13.0931	15.3931	-4.53829	-3.23693	6.69307	-0.486576	1.17307	-1.50693	11.3031	9.99213	8.77508	10.5531	10.3323
snbisnbisnn		-10.0241	53.4265	90.5565	17.2665	-49.8435	8.96647	15.2065	8.05647	11.8665	-8.49353	-8.21353	26.8565	13.8303	11.4365	33.5765	1.00963	8.06647	10.9865	21.6265	2.43733	1.07647	13.0265	8.11135	8.91647	19.3965	19.1547	18.0666	27.3865	27.3862	10.1065	-4.25254	-4.27353	-6.44353	38.4165	10.6506	13.0765	15.6965	-3.59776	-3.32353	3.63647	-3.09323	-1.81353	-4.78353	10.5465	9.44672	8.00096	1.74647	1.54402
snbisnbisnp		2.73729	-74.2627	150.917	-7.34271	-76.4627	-21.5527	19.7373	5.24729	8.28729	-5.97271	-4.96271	21.8573	8.81986	6.98729	29.4273	-3.4927	4.22729	14.5273	20.3473	0.970433	0.467293	13.4673	8.31722	9.34729	21.3273	21.0649	19.9784	29.5873	29.587	9.82729	-4.703	-4.21271	-5.94271	38.7473	11.0465	14.2173	15.9773	-3.61157	-2.48271	7.02729	-0.0278467	1.53729	-1.06271	12.4473	11.1803	9.90721	11.2073	10.992
snbisnbisnsb		3.18835	-88.0669	40.9631	-27.8769	-87.0969	-48.0269	20.1631	3.46311	8.05311	-5.46689	-6.71689	21.4631	8.16659	6.33311	28.8131	-5.57894	2.99311	15.3231	20.2331	0.347484	0.0331138	13.9031	8.61959	9.75311	24.1631	23.8869	22.8196	34.3331	34.3328	10.0631	-4.91883	-4.25689	-5.90689	38.2431	9.54219	13.1931	16.1231	-4.04288	-2.60689	7.70311	0.386164	2.11311	-0.606886	12.7631	11.4237	10.2271	11.7731	11.5489
snnpbnsnp		-28.1953	-144.819	240.941	26.9615	-13.4085	57.5015	10.7515	11.9315	10.2715	-13.4985	-3.49851	28.4515	16.97	13.9015	34.1015	6.74303	11.1415	7.12149	21.2115	4.74014	1.94149	9.39149	5.30257	5.59149	14.7515	14.5441	13.4708	15.5315	15.5312	7.05149	-5.21604	-6.22851	-8.40851	33.7615	9.64497	10.0415	13.6215	-2.72817	-4.10851	-2.98851	-8.45768	-7.89851	-10.5885	6.53149	5.63342	4.11438	-3.90851	-4.08336
snnsnnsnas		-28.1067	140.101	-53.8293	49.8907	-22.4293	91.7507	11.3307	13.9407	11.7707	-12.3693	-4.85925	29.6507	17.7104	14.5107	35.9507	7.73035	12.0507	7.34075	21.5807	4.44829	1.45075	10.5607	6.34196	6.64075	15.0707	14.8646	13.7654	16.6107	16.6105	7.81075	-4.89163	-5.99925	-7.75925	36.4107	11.4431	11.6607	13.8707	-3.11017	-4.63925	-2.16925	-7.80034	-7.22925	-9.83925	7.45075	6.57489	4.9666	-5.14925	-5.3239
snnsnnsnbi		-21.9051	113.608	26.3479	12.0079	-34.4821	51.9279	12.0879	12.1379	12.0479	-11.1721	-3.98214	29.4879	17.362	14.3179	35.5979	6.34516	11.3379	8.58786	21.6079	4.06144	1.42786	11.1379	6.79507	7.19786	16.9479	16.7331	15.6502	20.5679	20.5676	9.17786	-3.87076	-4.74214	-6.90214	37.1179	11.5457	12.2879	14.5079	-2.95805	-4.08214	-0.41214	-6.27184	-5.54214	-8.39214	9.22786	8.31251	6.74866	-3.77214	-3.95298
snnsnnsnp		-29.8258	112.679	25.2891	56.9291	-20.2309	97.4091	11.7691	15.0291	11.8891	-12.9809	-3.84091	30.0391	18.3523	15.0991	36.4391	9.10616	12.9891	7.82909	21.9491	5.25009	2.09909	10.6591	6.53497	6.76909	14.3291	14.1291	13.0191	15.1691	15.1688	7.72909	-4.64084	-5.87091	-7.63091	36.4791	12.1789	12.1091	14.0391	-2.48452	-4.21091	-2.40091	-7.87355	-7.40091	-9.92091	8.55909	7.71453	6.0799	-5.25091	-5.42061
snnsnnsnsb		-24.7699	178.849	-31.6011	26.9889	-32.7411	73.5289	11.3289	12.6989	11.8589	-11.9811	-4.80111	29.4989	17.3815	14.3289	35.7789	6.83312	11.6189	7.63889	21.6289	4.15463	1.44889	10.9789	6.63711	7.00889	15.7289	15.5199	14.4099	18.9989	18.9986	8.53889	-4.44105	-5.36111	-7.37111	36.8889	11.4684	12.0889	14.2589	-3.11088	-4.33111	-1.11111	-6.93558	-6.25111	-9.00111	7.89889	7.00959	5.39186	-3.61111	-3.78759
snnsnpsnas		-18.6267	74.4631	22.4031	40.3131	-39.1069	76.2831	13.4931	10.9531	11.5231	-10.6069	-6.18695	26.8831	14.128	11.6431	34.0931	3.83233	9.51305	8.14305	21.3831	2.94846	1.05305	11.6631	6.97838	7.57305	14.5531	14.3315	13.1852	17.5731	17.5728	8.04305	-5.63187	-6.00695	-7.48695	37.7731	11.2689	12.8331	14.6131	-3.74185	-4.16695	0.923054	-5.32735	-4.37695	-6.78695	7.39305	6.41163	4.8103	1.18305	0.996314
snppbpsnas		-11.3971	-5.33891	-0.208906	61.7011	-40.5389	31.0411	9.78109	1.70109	3.85109	-11.1389	-4.01891	20.0811	6.32414	4.86109	27.0811	-5.83825	1.47109	8.80109	19.3311	-0.858436	-1.20891	10.1311	4.78863	5.78109	5.50109	5.20777	4.03744	3.51109	3.51072	7.76109	-7.19764	-6.59891	-5.53891	30.5711	2.41483	5.56109	14.6811	-5.57293	-4.46891	3.35109	-3.79793	-2.32891	-3.44891	-3.59891	-4.82183	-6.33034	3.38109	3.13585
snppbpsnn		-11.3281	74.466	287.816	-0.033992	-54.034	54.956	12.536	7.93601	9.89601	-8.75399	1.85601	25.146	12.4769	9.97601	31.856	1.6616	7.47601	8.35601	20.476	2.1863	0.296008	10.976	6.34144	6.91601	13.966	13.7432	12.6024	17.246	17.2457	9.62601	-3.96956	-4.34399	-5.88399	37.196	10.7449	12.386	14.986	-3.22071	-3.64399	3.22601	-2.9682	-2.03399	-4.45399	8.36601	7.35669	5.80028	9.22601	9.03885
snpsnpsnas		-4.39293	-27.8453	90.4747	24.4247	-59.3653	61.1447	17.0747	8.46469	8.82469	-8.31531	-3.65531	22.3747	9.48522	7.90469	30.5447	-0.190102	6.54469	10.5547	20.3347	1.53842	0.934688	12.2547	7.2789	8.16469	15.7747	15.5371	14.3895	18.9347	18.9344	7.95469	-6.0076	-5.59531	-7.18531	38.7247	12.181	15.0047	15.0147	-3.81033	-3.01531	4.35469	-2.27737	-0.965312	-3.22531	8.73469	7.62105	6.15725	9.59469	9.39647
snpsnpsnbi		-0.774464	-66.8064	142.724	5.67358	-70.2664	14.7736	18.4536	7.58358	8.66358	-7.28642	-3.61642	22.3936	9.55138	7.83358	30.3536	-0.967237	5.93358	12.6436	20.6236	1.73469	1.10358	13.0236	7.99735	8.92358	17.9936	17.7473	16.6197	23.5336	23.5333	9.08358	-4.99695	-4.61642	-6.33642	39.0736	12.3501	15.1436	15.7336	-3.26571	-2.41642	5.83358	-0.938157	0.443583	-1.94642	10.9436	9.77734	8.37818	10.7136	10.5093
snpsnpsnn		-19.8982	48.2531	100.453	45.4531	-38.3969	81.2431	14.0931	11.7531	11.5631	-10.8369	-4.78691	27.2831	14.6892	12.0431	34.6131	5.03645	10.1931	8.75309	21.7131	3.58854	1.40309	11.8731	7.25985	7.77309	13.6031	13.3871	12.2193	16.2231	16.2228	8.22309	-5.21026	-5.78691	-7.13691	38.1631	12.1268	13.2631	14.8531	-3.16156	-3.90691	1.00309	-5.11876	-4.28691	-6.56691	8.55309	7.60446	5.95178	1.55309	1.37083
snpsnpsnsb		-3.05484	-63.1973	90.2227	7.37275	-68.6873	37.1227	17.6627	8.20275	8.67275	-8.07725	-3.94725	22.4627	9.58724	7.92275	30.6127	-0.444594	6.30275	11.5627	20.7027	1.82734	1.20275	12.9027	7.85857	8.77275	17.2427	17.0028	15.8449	22.0027	22.0024	8.53275	-5.51741	-5.12725	-6.80725	39.0527	12.443	15.1927	15.5527	-3.40776	-2.58725	5.23275	-1.5226	-0.167254	-2.48725	9.78275	8.64714	7.18516	10.8727	10.6732
snsbpbsbsnbi		6.41183	-204.162	-911.572	-64.3324	-75.3024	-37.0024	18.4776	1.22762	6.85762	-4.68238	-3.30238	20.8176	7.31714	5.61762	27.7576	-7.11561	1.77762	13.7176	19.9576	-0.241157	-0.352377	13.3076	7.93994	9.12762	22.3576	22.0781	20.9993	31.8576	31.8573	10.7576	-4.45279	-3.64238	-5.26238	37.5776	8.49795	12.4276	16.3776	-4.10852	-2.46238	8.31762	0.885983	2.68762	-0.0123773	10.0776	8.7193	7.51807	18.9876	18.7608
snsbsnsbsnas		-1.28341	-54.4101	-108.29	-17.2701	-72.8001	5.34991	17.3899	5.34991	7.67991	-7.42009	-6.77009	21.3399	8.04399	6.29991	29.1799	-4.00889	3.70991	11.7299	19.9899	0.277107	-0.160093	12.9199	7.65877	8.71991	21.6399	21.384	20.2505	28.2299	28.2296	8.40991	-6.33582	-5.79009	-7.32009	38.1299	10.0879	13.3199	15.2599	-4.64182	-3.46009	5.69991	-1.462	0.119907	-2.38009	9.02991	7.78286	6.42516	10.9799	10.7694
snsbsnsbsnbi		1.04652	-93.5931	-54.5231	-33.7831	-84.5831	-35.4931	19.3369	4.23686	8.05686	-6.29314	-6.97314	21.5469	8.18812	6.37686	29.1269	-5.03593	3.26686	14.2069	20.3869	0.452922	0.0968621	13.8269	8.50962	9.62686	23.8269	23.5589	22.4545	33.0069	33.0065	9.53686	-5.4456	-4.82314	-6.38314	38.3569	9.75574	13.2669	16.0169	-4.17476	-2.81314	7.14686	-0.173638	1.51686	-1.11314	11.6569	10.3491	9.07699	11.8769	11.6585
snsbsnsbsnn		-14.4267	122.632	-41.3582	4.76182	-52.1782	32.6518	13.5118	9.28182	11.6818	-10.0582	-9.07818	26.8318	13.7779	11.4918	33.9118	1.94235	8.63182	8.77182	21.6818	2.56044	1.19182	12.7218	7.7863	8.55182	17.7518	17.5215	16.377	24.4318	24.4315	9.00182	-5.2574	-5.28818	-7.27818	38.2218	10.7506	13.0518	15.3118	-3.86429	-3.66818	2.50182	-4.17944	-2.96818	-5.72818	7.88182	6.83775	5.27864	2.46182	2.26839
snsbsnsbsnp		-1.73802	-77.1618	-7.53175	-14.2118	-74.5918	9.82825	17.9482	6.75825	8.29825	-7.56175	-5.63175	21.9782	8.88312	7.13825	29.9582	-2.37387	4.88825	12.2382	20.5882	1.23157	0.688249	13.2982	8.10749	9.10825	20.1882	19.939	18.7874	26.6882	26.6879	8.78825	-5.67152	-5.21175	-6.80175	38.7382	11.3357	14.3082	15.7282	-3.79284	-2.78175	5.96825	-1.058	0.428249	-1.99175	10.0082	8.8035	7.39557	11.5282	11.3225
tl3o3		-0.828051	616.361	-48.3589	144.171	54.7911	-20.4289	-1.28891	4.59109	1.30109	-7.37891	7.48109	26.9611	18.8744	16.1011	28.7911	8.97113	11.9211	4.21109	21.1911	9.64437	6.98109	6.46109	3.63981	3.65109	5.16109	4.85398	4.20324	12.4911	12.4907	17.7911	9.08053	7.92109	3.08109	30.4111	13.0157	12.8311	18.3211	6.85217	5.30109	4.34109	0.511578	0.721088	-2.91891	7.06109	5.737	5.26945	0.391088	0.146348
tl3po3		19.6914			-19.6723	-38.6323	-29.1623	10.8877	-15.2623	0.947749	4.66775	6.56775	15.1377	0.283439	-2.44225	19.4777	-20.9331	-10.2523	7.63775	16.7377	-5.61842	-6.45225	8.57775	2.93401	4.16775	13.1277	12.6326	11.7869	17.4077	17.4073	15.7077	-1.31695	-0.822251	-1.93225	33.3277	-0.0683305	4.16775	17.2177	-5.50725	-4.11225	12.2977	4.23064	6.20775	3.12775	0.557749	-1.41706	-2.07037	14.5577	14.1675
tl3s3		6.18728	248.108	-136.762	35.048	-18.472	-47.312	-1.29196	-5.44196	0.818037	-7.38196	5.24804	18.008	5.42545	3.09804	21.458	-9.19473	-2.81196	3.62804	16.538	-1.73111	-3.22196	6.16804	1.4228	2.09804	6.38804	5.96814	5.0122	13.188	13.1876	14.958	1.26935	1.11804	-0.521963	30.088	3.58395	5.72804	15.768	-2.51982	-2.49196	8.19804	1.80333	2.88804	0.448037	1.34804	-0.506023	-1.21528	7.26804	6.93494
tl3se3		10.0215	-38.0282	-55.6882	37.6818	-7.29821	-28.6182	5.19179	-8.47821	0.591794	-0.558206	5.71179	16.1018	2.75879	0.431794	19.8318	-13.8867	-6.10821	4.22179	15.9718	-3.67849	-4.80821	5.97179	0.923354	1.82179	10.1218	9.67335	8.77489	14.2218	14.2213	14.0718	-0.700576	-0.548206	-2.09821	30.2218	1.52693	4.45179	15.5218	-4.25559	-3.65821	8.47179	1.53538	2.94179	0.251794	0.0517945	-1.88557	-2.5102	8.87179	8.51763
tl3te3		15.4428	-246.347	-298.687	11.9328	-55.5772	-57.4572	9.53278	-13.2672	0.302783	2.93278	3.64278	15.2028	0.419443	-2.14722	19.6028	-19.1702	-9.65722	6.22278	16.9428	-5.13117	-6.06722	7.73278	2.04791	3.19278	12.2728	11.8179	10.8353	16.8228	16.8223	14.7628	-1.92729	-1.54722	-2.44722	32.4628	0.066673	3.78278	16.9928	-5.36836	-4.25722	10.9228	2.96759	4.76278	2.05278	-1.95722	-3.86189	-4.7172	14.1128	13.7546
tlntlntlas		14.4407	392.49	-45.2997	-14.2197	-1.90969	-47.1897	2.80031	-11.2597	-2.22969	-7.89969	11.7903	17.1903	5.50204	2.98031	19.6403	-8.25573	-3.00969	4.15031	14.4003	-2.36621	-4.32969	6.80031	2.41286	2.85031	5.90031	5.37338	4.4875	13.8803	13.8792	17.3703	4.78225	4.27031	2.25031	29.6303	5.31001	6.63031	15.1003	-1.61847	-2.18969	11.1003	5.25776	6.03031	3.44031	3.27031	1.47961	0.720722	14.5803	14.1364
tlntlntlp		11.4227	348.314	-30.6258	-16.3558	-0.955812	-43.8658	2.60419	-10.3558	-2.88581	-11.0458	9.54419	17.1642	5.56754	3.05419	19.6242	-7.69616	-2.73581	3.85419	14.2242	-2.32315	-4.35581	6.18419	1.83146	2.21419	6.89419	6.3672	5.45936	13.5142	13.5131	16.2142	3.80082	3.22419	1.16419	28.9942	5.02647	6.21419	14.4642	-2.00486	-2.70581	9.67419	3.91851	4.61419	2.11419	4.47419	2.67477	1.89887	12.1142	11.6703
tlotlstlse		2.94825	236.461	-2.39949	71.3705	4.54051	-34.5995	0.26051	-1.62949	2.06051	-5.11949	3.49051	21.3605	10.0418	7.33051	24.3705	-3.60372	1.79051	3.36051	18.7805	2.35408	0.27051	6.53051	2.36927	2.83051	6.69051	6.30922	5.45597	12.8805	12.8801	15.8805	3.53602	2.95051	0.21051	30.4105	6.221	7.51051	17.1205	0.68947	0.0705104	6.80051	1.13968	1.96051	-1.05949	2.22051	0.50976	-0.10295	4.33051	4.02604
tlpobpoalpo		24.0908			1.8372	-25.9828	11.3372	15.6872	-9.0628	4.0172	4.3172	6.6472	12.2072	-3.01967	-6.2128	20.1572	-18.7749	-10.0328	12.6472	14.6872	-7.76262	-9.7828	9.7572	4.28408	5.2172	17.5472	17.2028	16.1326	20.1072	20.1069	11.3972	-5.41043	-5.6228	-4.6228	38.0272	4.68146	7.4272	14.4372	-8.06477	-7.9828	10.7872	3.16664	4.6572	2.7472	9.5172	7.95149	6.75334	12.6172	12.3342
tlptlptlbi		0.462413	59.1078	-280.912	-39.9222	-74.4522	-88.0122	6.13784	-14.6522	-4.08216	-11.9722	1.10784	13.8978	0.523287	-1.30216	16.5978	-16.1002	-9.14216	7.02784	14.5678	-5.1441	-5.74216	8.42784	2.88124	3.83784	8.64784	8.02319	6.99444	10.7878	10.7866	11.7678	-3.05469	-2.69216	-0.0521632	20.3778	-7.03142	-4.33216	13.8478	-6.10568	-5.15216	8.69784	1.2527	2.71784	2.38784	-3.91216	-5.99257	-6.84667	9.11784	8.59237
tlsbsals		10.3441	50.6893	85.7993	64.8493	-1.29067	-4.35067	9.65933	-1.59067	1.14933	-3.58067	1.83933	10.7293	-2.40986	-4.51067	17.8493	-10.9843	-6.12067	10.0893	11.2893	-7.31371	-9.21067	4.85933	0.250908	0.789328	7.21933	6.93105	5.83747	6.84933	6.84907	6.95933	-6.56984	-6.91067	-6.49067	32.3493	6.18506	7.42933	9.96933	-8.29097	-8.95067	4.08933	-1.87096	-1.07067	-2.27067	6.57933	5.32395	3.973	4.49933	4.25614
tlsebsealse		13.6044	-34.9184	150.122	54.2516	10.2416	25.5916	12.8116	-4.32839	1.87161	0.801611	1.83161	10.8716	-2.9996	-5.56839	18.3216	-13.7587	-7.99839	10.8916	12.5116	-7.44471	-9.56839	6.40161	1.49977	2.14161	11.1416	10.8353	9.74409	11.0816	11.0813	7.81161	-6.81028	-7.23839	-6.51839	33.9616	5.42583	6.86161	11.4016	-8.32841	-8.92839	5.87161	-0.628549	0.341611	-1.07839	5.58161	4.19841	2.90324	7.03161	6.77569
tlsetlsetls		8.67	49.9131	-39.8069	36.1131	-11.4769	-35.1469	2.97305	-7.43695	0.603053	-2.84695	5.42305	16.7031	3.61852	1.28305	20.3231	-12.3414	-5.06695	3.95305	16.1331	-3.04948	-4.30695	5.99305	1.04553	1.87305	8.85305	8.41411	7.49507	13.8631	13.8626	14.3231	-0.0799673	-0.0369473	-1.59695	30.0931	2.15358	4.79305	15.5731	-3.70002	-3.30695	8.33305	1.57913	2.87305	0.283053	0.463053	-1.44809	-2.10165	8.24305	7.89577
tlstlstlse		7.44294	144.699	-40.6512	35.3188	-15.2612	-41.3512	1.01881	-6.37119	0.798814	-5.09119	5.30881	17.4488	4.60175	2.26881	20.9888	-10.6922	-3.87119	3.88881	16.3988	-2.34564	-3.72119	6.16881	1.31827	2.06881	7.65881	7.23018	6.29052	13.5588	13.5584	14.6888	0.630434	0.578814	-1.03119	30.1988	2.95438	5.33881	15.7188	-3.07944	-2.87119	8.30881	1.72982	2.91881	0.398814	0.968814	-0.913996	-1.59822	7.81881	7.47917
tlstlstlte		9.27118	77.5096	-173.21	27.1196	-31.6004	-49.0404	2.17957	-8.03043	0.689567	-3.68043	4.26957	17.1296	3.80752	1.38957	20.8796	-12.3877	-5.10043	4.34957	16.6796	-2.86305	-4.20043	6.70957	1.63832	2.45957	8.11957	7.69264	6.71443	14.2996	14.2991	14.9796	0.297127	0.299567	-1.09043	30.8796	2.47861	5.06957	16.1996	-3.45076	-3.10043	9.14957	2.22922	3.52957	1.01957	0.169567	-1.70396	-2.47535	9.34957	9.01098
tltebtealte		19.0185	-31.0403	44.9097	30.0697	-32.2203	-8.9003	14.3997	-8.2903	2.4497	1.7397	1.9797	10.9097	-4.49711	-7.2503	19.1197	-18.5299	-10.5203	11.3297	13.9997	-8.51732	-10.3003	8.2197	2.65723	3.5697	14.4697	14.153	12.9777	16.1197	16.1194	9.0797	-7.60096	-7.6803	-6.4903	36.4997	3.77711	6.4097	13.2697	-9.18473	-9.0803	8.3397	0.773553	2.1797	0.619703	5.1797	3.72414	2.30593	11.3697	11.1075
tltetltetls		12.2834	-87.5928	-225.633	19.3672	-43.9828	-52.6128	5.65717	-10.7128	0.407165	-0.342835	3.63717	16.0972	2.04932	-0.452835	20.1572	-15.8008	-7.47283	5.09717	16.7472	-4.05183	-5.20283	7.13717	1.75341	2.72717	10.0272	9.58887	8.60159	15.4272	15.4267	14.8272	-0.848125	-0.672835	-1.80283	31.5372	1.18577	4.29717	16.5372	-4.45972	-3.74283	9.97717	2.53765	4.07717	1.47717	-1.06283	-2.9588	-3.77278	11.4772	11.1305
ABSOLUTE DIFFERENCE		HF-D4	PM6-D3H4X	PM7	GFN0-xTB	GFN1-xTB	GFN2-xTB	B97M-V-C	B97-3c	r2SCAN-3c	PBEh-3c	wB97X-3c	PBE	PBE-D3BJ	PBE-D4	BP86	BP86-D3BJ	BP86-D4	B97M-V	TPSS	TPSS-D3BJ	TPSS-D4	r2SCAN	r2SCAN-D3BJ	r2SCAN-D4	M06-L	M06-L-D3(0)	M06-L-D4	MN15-L	MN15-L-D3(0)	PBE0	PBE0-D3BJ	PBE0-D4	PBE0-NL	B3LYP	B3LYP-D3BJ	B3LYP-D4	TPSSh	TPSSh-D3BJ	TPSSh-D4	r2SCAN0	r2SCAN0-D3BJ	r2SCAN0-D4	r2SCAN0-NL	M06	M06-D3(0)	M06-D4	M06-2X	M06-2X-D3(0)
al3as3		1.76543	258.253	4.11322	52.7132	4.37678	33.1532	16.0932	8.76678	1.10678	11.6768	7.84678	10.3132	4.04472	5.74678	18.5632	14.1913	7.38678	13.9232	10.4432	10.1485	11.0368	7.50322	1.99755	2.91322	12.0032	11.5718	10.3679	13.7432	13.742	4.74322	10.4722	10.1168	7.01678	31.2032	2.23731	5.01322	8.40322	12.0688	11.5168	4.35322	2.8232	1.51678	1.42678	10.0132	8.31906	7.05172	9.17322	8.8089
al3bi3		5.44193	44.3461	114.714	24.5561	18.1261	19.5761	4.1839	18.9261	7.5961	12.7661	12.3161	8.0439	6.14874	7.9161	16.2139	19.5837	10.2761	3.7939	8.1439	12.7391	12.9861	7.9739	2.4042	3.5939	8.6739	8.21209	7.16856	15.1739	15.1724	4.1439	11.6013	10.7861	8.2461	28.2839	2.1676	2.0439	6.7339	14.3161	12.7661	6.1739	1.42097	0.3639	0.2261	4.6739	2.89867	1.92997	7.6939	7.3091
al3n3		12.3008	107.982	277.952	62.6222	47.3022	17.8822	10.4322	7.06784	6.70784	24.2678	1.92784	14.3722	3.12278	1.36216	19.7722	2.96877	0.362164	5.79216	8.56216	6.80448	8.79784	0.0321641	3.81796	3.55784	2.59216	2.20512	1.28178	1.46784	1.46822	3.76216	7.37847	7.87784	6.95784	25.9022	4.43434	5.05216	5.20216	9.67525	10.8278	4.52784	9.29932	8.89784	9.48784	8.24216	6.87218	5.85576	2.50784	2.83617
al3o3		14.4107	53.5084	175.038	164.348	45.0884	27.4084	2.17164	0.568365	6.63164	19.6516	5.76836	17.2784	8.55502	6.69836	20.9884	2.61182	5.30836	5.78836	9.22836	2.79639	4.91164	0.411635	3.18404	3.07164	0.0416352	0.231335	0.957455	3.87164	3.87183	5.63836	3.04512	3.72164	4.35164	22.8484	5.50496	5.66836	5.69836	5.91709	7.24164	5.35164	8.87502	8.65164	9.95164	11.1084	10.3535	9.37339	7.95164	8.11678
al3p3		0.0639296	87.5875	34.6975	40.2525	15.8625	15.7625	18.7625	6.03748	6.29748	15.6775	7.21748	7.62252	6.6108	8.08748	16.1625	14.7804	8.83748	13.3325	7.63252	12.4875	13.4075	3.25252	2.18754	1.37748	6.10252	5.68598	4.40346	8.56252	8.56143	1.64252	13.1355	12.8375	9.60748	28.9825	1.13434	3.56252	5.40252	14.4784	14.1575	0.182524	6.75291	5.62748	5.18748	9.24252	7.63619	6.20491	4.48252	4.12748
al3po3		12.4917			11.1378	3.06778	36.6022	17.8222	7.28778	1.77222	0.622222	0.502222	11.1122	4.48442	6.97778	21.0822	18.4277	8.75778	12.6022	10.8822	12.1141	13.2078	5.83222	0.139042	1.27222	12.6122	12.2922	11.184	16.6822	16.6819	6.85222	10.3309	9.92778	7.38778	38.0422	4.19161	8.01222	9.41222	13.6453	12.7178	4.06222	3.80601	2.06778	3.02778	12.2722	10.7165	9.49216	4.88222	4.62299
al3s3		1.00678	46.2191	93.8209	46.4791	31.3091	32.2491	11.5091	3.42085	4.10085	9.52085	0.0891498	9.89915	3.69653	5.22085	17.6791	12.0524	6.22085	8.19915	7.13915	12.1134	13.1909	0.82915	4.02676	3.30085	0.0408502	0.29728	1.45065	0.13915	0.13886	3.49915	10.5231	10.3109	8.22085	29.6091	2.65557	4.94915	5.07915	13.8525	13.7309	1.46085	7.71495	6.68085	6.98085	5.60915	4.37098	2.96061	0.96915	0.75204
al3se3		3.52835	61.6333	13.0067	45.7033	42.9133	60.3833	14.8933	5.31671	0.836707	4.07671	0.646707	10.7133	3.68926	5.43671	19.3633	13.745	6.63671	9.98329	9.00329	11.7126	12.6967	2.95329	2.21591	1.31671	4.34329	4.07032	2.9362	5.61329	5.61298	4.65329	10.5277	10.1767	7.98671	33.1233	3.67042	6.55329	6.98329	13.5197	13.0467	0.533293	6.2849	4.99671	5.55671	5.54329	4.17711	2.8541	3.34329	3.11483
al3te3		8.97449	172.552	7.21773	15.7723	1.68227	12.5523	15.9823	8.20773	1.21773	1.95773	3.99773	9.80227	5.84576	7.96773	19.5723	18.3804	9.64773	10.7723	9.83227	13.0446	13.9977	4.04227	1.71722	0.627728	8.01227	7.72144	6.50122	11.6423	11.6419	5.11227	11.8258	11.3677	8.66773	35.7723	2.82502	6.37227	8.16227	14.6765	13.8177	2.14227	5.6387	4.01773	4.64773	6.40227	4.95401	3.50839	5.65227	5.41422
alasalasalsb		1.95435	167.66	57.8397	30.1797	19.7903	26.4397	14.2797	11.3203	3.05026	12.1603	7.91026	9.29974	5.20097	6.94026	17.6497	16.0445	8.77026	12.1897	9.68974	11.2194	12.0003	7.26974	1.66241	2.63974	11.7497	11.3186	10.1093	13.6897	13.6884	4.05974	11.4409	11.0003	7.93026	30.3897	0.819742	3.86974	7.73974	13.107	12.3703	4.23974	3.12833	1.72026	1.71026	9.00974	7.31941	6.03949	9.07974	8.71678
alasgaasalp		0.218184	59.089	83.681	55.631	1.641	14.891	16.981	8.619	3.019	12.939	6.549	9.541	4.75868	7.439	17.181	15.1332	10.199	13.261	9.831	10.6212	12.889	6.021	0.546681	1.171	11.751	11.3155	10.024	12.231	12.2298	4.001	11.0938	11.699	8.109	29.681	1.02272	2.011	7.791	12.5198	13.279	3.131	3.97501	3.059	2.809	7.711	6.00173	4.57836	7.621	7.25209
alasgaasalsb		0.677356	122.901	326.991	33.2912	18.4288	15.1012	13.7612	12.2988	3.38883	11.8788	8.12883	9.13117	5.36595	8.09883	16.6512	17.2293	11.4388	11.1412	9.58117	11.3598	13.4188	6.96117	1.35769	2.09117	12.3612	11.9196	10.653	12.7812	12.7799	4.33117	11.2082	11.6588	8.11883	28.8012	0.85048	0.63117	7.85117	13.0463	13.4588	4.38117	3.00394	1.90883	1.85883	5.76117	4.0215	2.65028	8.94117	8.56968
albialbialas		4.38009	5.52509	104.405	5.61509	6.83491	1.09509	9.51509	14.8549	4.85491	11.9649	10.0449	9.02509	5.31419	7.08491	17.2251	17.7292	9.29491	8.20509	9.04509	11.8872	12.3749	7.95509	2.37206	3.47509	10.7351	10.2917	9.17809	15.4951	15.4937	4.49509	11.1648	10.5149	7.80491	29.7251	0.392951	3.30509	7.40509	13.5981	12.4049	5.61509	1.88737	0.254911	0.624911	7.83509	6.08854	4.99976	8.01509	7.64419
aloalsalse		3.6169	64.5974	31.0074	83.9374	36.2374	38.6774	6.78743	4.42257	4.86257	11.6826	0.997429	12.5974	0.285979	1.59257	19.1774	7.9173	2.95257	7.14743	8.07743	9.32213	10.9626	1.20743	3.04684	2.51257	0.852571	1.09832	2.10863	0.672571	0.672811	5.14743	7.51866	7.70257	6.40257	28.5274	3.86139	5.35743	5.83743	11.2272	11.7126	1.49257	6.99919	6.21257	6.94257	6.83743	5.76764	4.45309	0.652571	0.863421
alogaoals		12.4812	24.7123	36.3477	120.388	32.4777	16.3277	0.0876619	3.59234	6.87234	15.9723	1.74766	14.4277	4.35998	1.38766	18.7077	3.0415	1.17234	3.61766	8.04766	6.01855	9.37234	1.60234	4.97775	4.94234	2.29234	2.51446	3.42738	3.33234	3.33257	4.46766	5.75783	7.22234	6.78234	22.9877	2.92052	1.76766	5.00766	8.70903	10.9823	5.63234	9.96364	9.83234	10.9323	3.95766	3.00368	1.80272	8.31234	8.50287
alogaoino		15.826	41.5871	85.6929	135.113	33.1029	4.29294	4.58706	2.00294	4.54706	15.7071	0.977064	20.9829	12.4533	9.33294	23.9129	5.04912	6.31294	3.26294	12.4229	0.512416	3.05706	0.0329364	2.76093	2.89706	0.272936	0.0603564	0.722404	1.30706	1.30733	8.47294	0.238854	1.93706	3.50706	24.6429	7.28455	5.71294	8.58294	3.0308	5.58706	5.05706	8.68354	8.74706	10.7871	7.64294	6.72181	5.75316	11.0171	11.1967
alpalpalas		0.448251	39.3584	43.6216	47.6184	6.87841	19.6184	18.1784	6.92159	4.55159	14.4316	7.32159	8.57841	5.73589	7.29159	17.0084	14.6185	8.38159	13.6984	8.54841	11.7888	12.7016	4.62841	0.843395	0.00159486	8.20841	7.78828	6.52879	10.3284	10.3273	2.69841	12.2638	11.9516	8.74159	29.7684	1.47289	4.01841	6.36841	13.7669	13.3716	1.51841	5.51046	4.32159	3.99159	9.57841	7.9469	6.56137	6.02841	5.6712
alpgapalas		1.39881	72.2752	26.0748	45.2852	3.14519	8.54519	17.6452	8.98481	5.05481	14.6148	8.01481	8.44519	5.81673	8.41481	16.1252	15.5931	10.9448	12.9052	8.34519	11.9581	14.2248	4.63519	0.819236	0.234806	9.55519	9.12488	7.80599	9.94519	9.94405	2.75519	12.1988	12.8248	9.25481	28.2752	0.00955617	0.875194	6.28519	13.8374	14.6648	1.64519	5.38282	4.52481	4.20481	7.57519	5.89593	4.41532	5.55519	5.18943
alpogapoalte		10.166			5.19689	9.66689	17.9031	16.4031	9.49689	0.616892	1.47689	0.196892	10.4531	5.14834	8.59689	19.5431	19.6461	11.8869	11.5731	10.5231	12.4617	14.8869	4.60311	1.10363	0.226892	12.6631	12.3431	11.1461	14.1031	14.1028	6.23311	10.9049	11.4369	8.53689	36.0931	2.46859	4.49311	9.08311	13.9506	14.2869	3.16311	4.68974	3.31689	4.20689	8.93311	7.36007	5.97998	3.68311	3.42378
alpogapoinpo		11.1903			6.74168	34.6917	23.0283	16.2483	10.4817	0.558316	0.258316	1.01168	13.4283	2.06745	5.60168	21.1183	19.0006	10.5217	11.8383	13.3183	9.68534	11.9717	6.81832	1.10479	2.04832	15.4483	15.0858	13.9732	16.0883	16.0879	9.60832	7.66842	8.11168	6.26168	36.4683	2.4757	4.85832	12.0983	11.0621	11.1417	6.18832	1.79333	0.291684	1.86168	8.15832	6.45005	5.27123	3.60832	3.31874
alsalsalpo		3.2738			33.7687	15.0487	33.6087	13.4887	4.52134	2.46134	5.85134	0.0813373	10.2387	4.1324	6.01134	18.7487	14.3014	7.45134	9.44866	8.12866	12.5517	13.7013	2.33866	2.85161	2.00134	3.63866	3.36397	2.20256	5.29866	5.29835	4.55866	10.611	10.3913	8.01134	32.3687	3.05397	5.67866	6.29866	14.1874	13.8813	0.238663	6.6101	5.37134	5.79134	7.70866	6.36963	4.97401	1.74866	1.51878
alsalsalse		0.361783	58.9475	53.1325	48.2175	34.4775	40.4275	12.5375	4.14249	3.43249	7.78249	0.232487	10.1375	3.70601	5.31249	18.1575	12.6211	6.43249	8.72751	7.67751	12.0336	13.0925	1.52751	3.43136	2.65249	1.27751	1.01502	0.133557	1.80751	1.80721	3.87751	10.5062	10.2625	8.13249	30.6275	2.91028	5.35751	5.65751	13.7698	13.5525	0.782487	7.21958	6.11249	6.48249	5.60751	4.32351	2.94223	1.72751	1.50615
alsalsalte		2.38447	79.7605	75.5595	33.4105	19.5005	20.3205	12.8305	4.92955	3.40955	6.77955	1.30955	9.79045	4.53536	6.26955	18.2305	14.2154	7.55955	8.79045	7.81045	12.7195	13.7795	1.76045	3.42412	2.57955	1.84045	1.57414	0.385772	3.61045	3.61014	4.02045	11.0066	10.7395	8.39955	31.6105	2.66901	5.29045	5.92045	14.3819	14.0595	0.339548	7.12626	5.90955	6.26955	5.67045	4.37008	2.91724	2.34045	2.11678
alsbalsbalbi		2.98144	67.9742	175.746	24.9242	47.5942	6.46581	7.80581	17.2642	6.93419	13.0142	9.68419	7.64581	6.91016	8.70419	16.1258	19.5375	10.8642	6.49581	8.34581	12.931	13.3942	7.16581	1.46028	2.59581	10.1858	9.73864	8.59026	13.9758	13.9744	3.06581	12.8732	12.1942	9.33419	28.6358	2.03388	1.78581	6.61581	14.751	13.4842	4.57581	3.09704	1.42419	1.74419	5.87581	4.15483	2.98426	8.59581	8.22261
alsbgasbalas		0.960451	61.4145	341.144	16.2455	31.4645	15.8055	12.2955	13.7145	4.55446	12.1645	6.80446	8.15554	6.5118	9.28446	16.1355	18.8066	12.4445	9.34554	9.07554	12.2159	14.1845	6.45554	0.752108	1.55554	11.7855	11.3434	10.0747	13.5355	13.5341	3.20554	12.6521	13.0145	9.60446	29.0055	1.36733	0.425538	7.21554	14.087	14.3145	3.70554	3.87383	2.66446	2.74446	5.08554	3.35189	1.96987	9.12554	8.75497
alsealsealpo		6.40524			27.2659	25.6159	54.8859	15.6459	5.97413	0.144126	2.54413	0.404126	10.6659	4.16406	6.16413	19.7559	15.4776	7.62413	10.7659	9.38587	12.1474	13.1841	3.75587	1.61027	0.634126	6.98587	6.69868	5.56457	9.06587	9.06555	5.26587	10.6081	10.2541	7.89413	34.6159	3.70763	6.83587	7.57587	13.8386	13.2341	1.57587	5.61518	4.18413	4.82413	7.75587	6.32389	5.02118	3.39587	3.15787
alsealseals		1.87354	65.3268	24.6032	47.4268	38.1968	49.8968	13.7368	4.71322	2.31322	5.88322	0.483223	10.4968	3.6577	5.34322	18.8368	13.1677	6.52322	9.32678	8.38678	11.8721	12.9032	2.24678	2.82514	1.98322	2.75678	2.48968	1.3458	3.70678	3.70648	4.27678	10.5357	10.2432	8.06322	31.9268	3.28312	5.93678	6.34678	13.6616	13.3232	0.163223	6.8006	5.60322	6.05322	5.54678	4.22566	2.86478	2.52678	2.30221
alsealsealte		5.35947	98.0327	5.62269	36.9427	28.5727	43.1027	15.0827	6.32731	1.09731	3.41731	1.70731	10.3327	4.4905	6.35731	19.3427	15.355	7.73731	10.1327	9.13269	12.3124	13.2773	3.22269	2.14996	1.18731	5.31269	5.03435	3.86895	7.45269	7.45237	4.75269	11.0159	10.6373	8.26731	33.9127	3.31378	6.40269	7.25269	14.0383	13.4373	0.992689	6.15141	4.75731	5.32731	5.76269	4.36983	3.00084	3.92269	3.69122
alsegaseals		1.22657	42.0966	145.887	34.2434	32.5334	36.9934	12.0534	7.21665	2.89665	6.83665	0.883351	10.4934	3.55671	6.34665	18.2834	13.7163	8.76665	8.47335	8.54335	11.6105	14.0866	1.67335	3.36696	2.79665	4.63335	4.35612	3.15821	3.50335	3.50304	4.38335	10.3729	11.0766	8.64665	31.5234	2.98992	3.85335	6.53335	13.3946	14.3666	0.416649	7.03416	6.17665	6.68665	4.24335	2.86102	1.42547	1.30335	1.07115
alsegasealte		4.29843	86.524	287.884	33.116	24.906	31.386	13.466	7.68399	2.04399	4.11399	1.42399	10.536	4.19781	7.18399	18.646	16.062	10.144	9.03601	9.28601	12.0694	14.474	2.67601	2.66623	1.96399	6.55601	6.26723	5.05041	6.11601	6.11569	5.06601	10.656	11.274	8.61399	32.686	2.17318	3.46601	7.48601	13.7367	14.444	0.816007	6.30974	5.25399	5.88399	3.36601	1.91533	0.471327	2.66601	2.42666
alsegaseinse		2.06471	11.3206	69.5306	44.5906	11.1506	37.6806	11.7506	7.19939	2.18939	4.18939	2.05939	13.6206	0.533577	3.44939	20.3006	13.1902	7.45939	8.43061	11.8106	8.71415	11.0494	3.79061	1.36566	0.699387	8.53061	8.21767	7.06687	7.17061	7.17026	7.54061	7.6038	8.20939	6.78939	32.4006	3.02714	4.29061	9.84061	10.5786	11.2594	2.08061	4.80834	3.79939	4.97939	2.98061	1.41103	0.175403	1.39061	1.1351
alsgasalo		4.56744	47.279	15.831	57.391	30.301	16.601	2.16095	4.05905	5.18905	12.909	2.56095	11.741	0.148347	3.00905	17.931	8.00635	5.02905	5.23095	6.81095	9.93677	12.969	0.349047	4.45268	4.22905	0.769047	1.01557	2.08266	3.12905	3.1293	4.63095	7.55512	8.72905	7.32905	27.641	3.95427	3.59095	4.73095	11.6747	13.499	2.41905	7.70557	7.32905	8.06905	6.83095	5.7287	4.34065	2.96905	3.18
alsgasalse		0.64014	38.1546	158.195	44.1446	25.4646	25.6946	10.2646	6.27544	5.50544	7.87544	0.305437	10.3346	3.42346	6.13544	17.6746	13.1358	8.61544	7.40456	7.81456	11.8145	14.3054	0.934563	3.99545	3.47544	2.25456	1.98321	0.779563	1.14456	1.14426	4.02456	10.3188	11.0654	8.72544	29.8046	2.15511	2.83456	5.80456	13.5624	14.6454	1.18544	7.60623	6.83544	7.29544	3.35456	2.01403	0.553743	0.184563	0.0435769
alsgasins		1.9946	35.3655	63.8455	33.3245	2.68549	5.42451	7.30451	5.16549	2.79549	9.72549	1.52549	13.9545	0.558743	2.22549	20.0745	10.2065	5.78549	7.07451	10.9145	8.22044	10.7555	2.48451	2.37132	1.89549	4.12451	3.83388	2.64561	3.33451	3.33418	7.14451	6.89853	7.70549	6.36549	30.3845	3.3494	3.94451	8.75451	10.1655	11.2855	0.554513	5.7895	5.05549	5.97549	3.57451	2.12782	0.787553	0.815487	1.05535
altealtealpo		10.0442			10.9556	2.57441	18.6456	16.6156	7.85441	0.174415	1.08441	2.47441	10.2556	5.40374	7.66441	20.0956	18.4481	9.41441	11.3756	10.1956	12.7683	13.7744	4.62559	1.11991	0.0144147	9.56559	9.26605	8.08073	13.3556	13.3553	5.68559	11.3656	10.9344	8.25441	36.5556	3.24796	6.86559	8.58559	14.3733	13.5044	2.75559	5.06656	3.40441	4.13441	8.38559	6.90237	5.52543	5.32559	5.08121
altealteals		5.78752	122.599	10.0712	23.2088	9.82878	14.9888	14.3488	6.46122	2.36122	4.23122	2.57122	9.79878	5.21538	7.15122	18.8988	16.307	8.69122	9.74878	8.74878	12.9969	14.0212	2.89878	2.58965	1.62122	4.62878	4.35182	3.13994	7.53878	7.53846	4.60878	11.3973	11.0512	8.49122	33.7188	2.7659	5.79878	6.98878	14.6249	14.0512	0.928777	6.37112	4.96122	5.42122	6.00878	4.63627	3.17255	3.96878	3.73866
altealtealse		7.22008	134.888	15.3783	27.0183	15.0483	27.5883	15.4283	7.2917	1.2317	2.7217	2.8117	10.0083	5.21851	7.2117	19.3883	16.8969	8.7517	10.4083	9.3983	12.75	13.7017	3.5983	1.96897	0.941705	6.5283	6.24364	5.05002	9.4083	9.40798	4.9083	11.4342	11.0117	8.4717	34.7883	3.0486	6.3583	7.6383	14.4149	13.6917	1.5583	5.90364	4.4017	4.9817	6.0483	4.62582	3.21896	4.7383	4.50337
altegatealpo		9.30696			19.4862	10.5338	12.0362	15.3762	9.67376	1.22376	1.94376	1.99376	10.2962	5.32272	8.62376	19.2262	19.4315	11.9738	10.5262	10.2462	12.6979	15.0438	4.26624	1.46308	0.603762	11.0062	10.6968	9.46103	11.5662	11.5659	5.98624	11.0678	11.5638	8.61376	35.2962	1.9805	3.94624	8.77624	14.1829	14.5138	2.90624	4.91717	3.58376	4.36376	6.41624	4.88071	3.42487	4.58624	4.3345
altegatealse		6.31226	162.273	258.263	28.1234	2.79337	18.7434	14.1034	9.73663	3.59663	3.86663	1.93663	9.73337	5.44214	8.50663	18.5034	17.8874	11.3566	9.57337	9.35337	12.7646	15.0966	2.95337	2.59537	1.82663	8.39337	8.09895	6.85181	8.90337	8.90304	4.73337	11.6047	12.1366	9.36663	34.0034	2.27038	3.87337	7.63337	14.4113	14.9366	1.22337	6.23735	5.06663	5.70663	5.14337	3.66571	2.17772	3.48337	3.24127
altegateinte		7.40041	44.6041	81.4559	21.6241	36.8459	3.51409	14.1541	10.0259	1.39591	2.09591	5.21591	12.5541	2.96984	6.21591	20.1941	18.362	10.9159	9.72409	12.6641	10.1928	12.4259	5.19409	0.582379	0.294091	11.9941	11.6647	10.4277	12.2141	12.2137	8.03409	8.983	9.43591	7.38591	34.7241	1.6467	3.64409	11.1341	11.7848	12.0159	4.21409	3.67769	2.31591	3.52591	3.22409	1.61587	0.209761	4.22409	3.95912
b3as3		2.29273	117.106	78.9458	83.6542	28.4758	23.8442	9.75417	2.41583	5.52417	10.4158	20.4758	6.65417	6.72506	9.61583	16.7642	11.3178	8.47583	6.61417	12.7542	5.92018	9.09583	11.7442	6.91743	7.18417	10.9342	10.5127	9.30167	13.2842	13.2835	0.114168	13.471	14.6758	12.3158	32.9942	7.18425	6.65417	9.80417	8.47235	10.4258	5.64417	0.429612	0.0158325	0.325832	5.35417	3.93685	2.36633	7.92417	7.56075
b3bi3		3.90024	79.5825	12.3625	6.1875	80.1175	22.0775	2.2325	13.1675	2.3675	10.9375	23.1475	5.7025	7.84857	10.5375	13.5825	18.9826	12.5075	3.4675	6.7525	12.7868	14.7575	5.7625	0.7392	1.3925	7.3325	6.87805	5.81758	11.4125	11.4113	1.7625	12.8412	13.1975	11.8075	26.9925	1.45833	0.4225	5.4225	14.0439	14.3775	4.8025	1.90999	0.8675	2.0775	0.4075	1.96646	3.18997	4.7625	4.37934
b3p3		1.53778	107.076	76.5139	62.1139	40.4661	6.91393	19.7839	4.88393	8.23393	11.8061	19.6961	5.52393	7.7825	10.0861	16.6239	9.40886	7.07607	11.4739	13.2439	4.96733	7.77607	10.5339	5.77953	6.04393	6.15393	5.73346	4.50215	12.8039	12.8035	2.00607	15.1224	16.0961	13.5561	34.0039	9.42465	8.94393	9.57393	8.08566	9.93607	2.93393	2.87358	2.52607	2.36607	8.99393	7.68024	5.99973	6.55393	6.18794
b3po3		41.2061			28.4819	46.9881	6.53187	18.9219	3.19813	9.17187	7.93187	9.36187	8.22187	5.86796	9.78813	17.9919	15.8348	10.5481	14.8419	14.2319	6.03702	9.69813	12.6919	7.79519	8.18187	21.4719	21.1574	20.0181	27.1719	27.1717	9.45187	5.56446	6.92813	5.61813	40.3819	10.3766	10.6719	14.4319	5.63365	7.46813	13.6919	7.08395	7.78187	6.31187	13.5219	12.2335	10.7105	14.9219	14.653
b3s3		28.019	85.2591	77.7191	94.2309	28.7591	4.17908	12.9209	1.29092	3.90092	3.07092	8.00908	0.76092	11.0863	13.5191	11.1309	11.7513	10.2591	13.0109	7.22092	8.9244	12.1191	4.98092	1.01898	1.13092	3.59092	3.30174	2.25148	7.27092	7.27084	0.14092	11.3367	12.5791	12.0691	34.3809	12.3367	11.2309	6.49092	9.02741	11.3491	3.68092	1.1646	1.00908	1.80908	5.71092	4.82144	3.18592	2.19092	1.94162
b3sb3		1.15441	244.837	143.427	0.647204	83.3372	29.1328	5.5928	7.0572	2.9828	12.3972	15.6272	6.0728	8.37623	10.8672	16.0328	16.845	10.8872	1.3472	9.9228	10.6601	12.6672	8.4328	3.11735	3.7728	9.1628	8.7366	7.52582	11.5428	11.5418	1.0972	16.2944	16.6272	14.6972	30.7128	1.38221	3.0828	6.9928	13.3697	13.8672	3.2328	3.69907	2.7072	3.5172	0.842796	0.641444	2.16019	2.8028	2.44253
b3se3		29.8275	62.086	28.504	78.136	16.704	31.046	15.106	0.0340137	5.17599	4.98599	5.80401	2.75599	9.8892	13.174	12.956	13.4363	11.494	14.586	9.73599	7.87789	11.754	7.88599	3.60054	3.71599	11.016	10.7191	9.61158	14.246	14.2459	2.52599	10.1402	11.774	10.644	35.836	11.1708	9.79599	9.17599	7.93618	10.604	6.69599	1.27362	1.47599	0.535986	7.87599	6.85556	5.19071	5.18599	4.92848
b3te3		35.1242	49.7316	33.8884	61.8016	63.5784	1.37162	17.2116	2.70838	7.57162	3.67162	1.80162	5.37162	9.05744	12.0184	15.9316	16.7885	11.4384	13.7316	12.7716	7.75344	10.5384	10.7516	5.74	6.25162	16.1716	15.8745	14.6839	20.7416	20.7414	5.38162	9.62396	10.4084	9.15838	38.6216	9.0161	10.0116	12.3316	7.84774	9.07838	10.0116	3.43163	4.22162	2.98162	8.61162	7.44184	5.76171	11.0116	10.7548
basalasbp		4.90124	146.904	53.3362	62.6338	54.6062	3.35619	15.2838	1.81619	3.64381	8.96619	15.3262	8.80381	5.22306	7.75619	18.6038	10.9624	7.23619	12.4438	13.7338	5.90322	8.52619	11.4538	6.33251	6.77381	12.1338	11.7225	10.4564	14.8038	14.8031	2.77381	11.5156	12.3162	9.54619	34.4738	7.38545	7.63381	11.0438	8.20951	9.57619	6.25381	0.210414	0.423806	0.383806	9.66381	8.25936	6.59951	8.66381	8.30544
basalasgaas		2.82879	34.5043	11.1043	75.9743	12.9457	16.3543	13.8443	7.16572	1.01428	8.98572	11.2757	9.53428	4.76744	7.97572	17.8043	14.031	10.1857	11.9843	12.3843	7.97722	11.0957	9.74428	4.39226	4.83428	13.8743	13.4545	12.1475	14.8543	14.8533	4.32428	10.6329	11.7857	8.47572	31.7843	3.31722	3.23428	10.2843	9.86225	11.4657	6.10428	0.814258	0.145718	0.175718	6.89428	5.30976	3.72598	9.48428	9.12099
basbasbbi		3.68928	82.6779	22.1879	58.5221	42.5479	8.38209	6.29209	6.44791	2.21209	10.1179	20.3979	5.95209	7.63681	10.4979	15.2321	14.5965	10.6579	2.53209	10.4921	8.709	11.5379	9.05209	4.11214	4.51209	9.72209	9.29409	8.11568	11.3721	11.3713	0.822087	13.2467	14.2079	12.0079	30.6321	3.71235	3.88209	8.29209	10.6123	12.0779	5.25209	1.09381	0.477913	1.01791	3.47209	2.04665	0.522627	6.84209	6.47614
basbasbn		17.7171	20.7541	59.8141	52.4859	37.5141	0.905946	12.6459	0.0459462	8.03595	4.94405	12.9741	6.27595	5.60765	8.23405	15.1859	8.2236	6.75405	12.0159	11.0859	5.1971	8.47405	11.7759	7.60963	7.72595	11.7759	11.3515	10.3093	12.4559	12.4556	3.55595	8.1529	9.48405	8.44405	34.0059	11.931	10.6259	9.74595	6.02185	8.35405	8.79595	3.68492	3.86595	3.20595	8.74595	7.49841	6.06249	8.58595	8.21922
basbasbp		1.92213	83.7426	34.5526	81.3974	31.8726	17.6774	13.3074	0.167447	6.42745	10.8426	20.0426	6.30745	7.07349	9.78255	16.7274	10.7233	8.07255	8.31745	12.9474	5.61318	8.68255	11.3574	6.54909	6.81745	9.29745	8.87697	7.65594	13.2274	13.2269	0.502553	13.956	15.0926	12.6426	33.3374	7.88696	7.34745	9.78745	8.32166	10.2626	4.81745	1.17498	0.782553	0.932553	6.44745	5.06931	3.45197	7.60745	7.2437
basbasbsb		1.71564	128.967	80.3669	59.3631	48.6569	24.1231	8.0831	3.9769	4.4931	11.0469	18.5769	6.2431	7.52102	10.2969	16.2531	13.4321	9.6469	3.8431	11.7131	7.64215	10.4669	10.3831	5.38285	5.7731	10.5131	10.0928	8.87508	12.3431	12.3424	0.286896	14.4303	15.3769	13.1169	32.0531	5.06097	5.1931	8.8431	10.1714	11.6769	4.7731	1.59688	1.0069	1.4569	3.9431	2.5171	0.940284	6.3231	5.96279
bbialbibsb		5.38025	10.3292	184.789	0.490806	99.0308	27.0608	5.37919	11.1808	0.150806	9.77081	16.3608	8.42919	5.93024	8.51081	17.0692	17.3314	10.2808	1.10919	10.2992	10.4499	12.1908	9.17919	3.79274	4.58919	10.7692	10.3537	9.18403	15.5692	15.568	3.58919	11.8888	12.0408	9.90081	30.5192	0.477714	2.76919	8.47919	12.2134	12.2508	6.80919	0.382056	0.839194	0.0108062	3.13919	1.53695	0.222854	6.46919	6.11674
bbibbibas		4.10579	59.4937	22.1763	31.8163	60.0337	8.49373	4.73627	9.17373	0.416269	10.2637	21.3637	5.98627	7.62034	10.4137	14.6363	16.6518	11.4737	0.133731	8.98627	10.449	12.8637	7.66627	2.67149	3.19627	9.29627	8.86014	7.73317	11.9863	11.9853	1.34627	13.0323	13.7037	11.9037	29.1063	1.34794	2.34627	7.15627	12.0963	13.0137	5.16627	1.3824	0.553731	1.42373	2.06627	0.583769	0.806931	5.60627	5.23543
bbibbibp		4.45592	63.2055	76.9345	28.5045	58.8355	10.8755	8.77449	6.08551	1.81449	9.92551	19.8955	5.97449	7.72169	10.3555	14.8745	15.9758	11.0055	1.99449	9.67449	9.79363	12.1455	7.62449	2.62288	3.14449	8.46449	8.036	6.88642	12.2545	12.2536	1.33449	13.004	13.6355	11.6655	29.9045	2.33721	3.29449	7.72449	11.5053	12.4255	4.94449	1.55724	0.755514	1.42551	3.59449	2.16551	0.698736	6.40449	6.03874
bbibbibsb		2.34205	105.171	239.349	2.4986	83.7114	5.9914	3.2986	11.1314	0.601397	11.2814	20.4914	5.8186	8.04253	10.6814	14.3986	18.3097	12.0114	2.8214	7.8286	12.08	14.0814	6.6186	1.49535	2.1486	8.0386	7.59433	6.48177	11.4386	11.4375	0.838603	13.9771	14.3414	12.7514	28.2486	0.524017	1.2786	5.9786	13.8087	14.2114	4.3086	2.48239	1.4614	2.5314	0.0586026	1.47191	2.80007	4.3386	3.96366
bnbpbas		16.7159	111.435	11.1555	41.8645	35.5355	6.33545	14.1745	0.0445484	6.99455	6.31545	12.8155	4.33455	7.55092	9.89545	13.4045	9.37642	7.92545	11.8345	9.70455	6.45195	9.49545	9.25455	5.10457	5.24455	9.21455	8.78581	7.74885	10.8545	10.8542	1.96455	9.60954	10.7855	9.77545	32.6945	10.9655	9.82455	8.40455	7.18107	9.37545	6.51455	1.48109	1.66455	1.14455	8.73455	7.49171	6.06193	6.18455	5.81412
boalobs		10.8437	42.9404	69.5104	99.1796	0.120383	5.47962	3.95962	2.30962	2.01962	5.09038	3.32038	7.77962	0.955883	2.49038	14.3196	2.43486	0.700383	7.39962	4.72962	7.0692	9.12038	1.97962	0.832443	0.710383	2.23962	2.00956	1.29842	2.78038	2.78048	2.01962	6.36096	7.02038	8.67038	27.5996	11.2787	10.9996	2.92962	8.34875	9.79038	0.850383	4.28098	4.10038	5.63038	7.33962	6.59792	5.56822	2.10038	2.29868
boalsgase		8.00253	143.426	26.8765	107.214	16.9535	8.14354	5.27354	4.13646	1.55646	3.99646	1.27354	7.78354	3.76206	6.85646	14.5135	10.0307	8.05646	7.13354	5.83354	10.3266	13.8865	0.673537	3.2298	3.12646	3.28354	3.02044	2.0041	1.05354	1.05336	4.54354	7.1172	8.63646	7.91646	29.0535	6.33929	5.11354	4.98354	10.7556	13.1665	0.383537	4.59967	4.39646	5.46646	8.29354	7.27546	5.85348	0.676463	0.903253
bpalpbas		2.96097	187.821	16.9793	85.9793	13.1907	2.32928	18.6393	0.0407206	4.64928	11.5407	14.9107	7.09928	6.78849	9.02072	16.9993	11.6425	8.03072	13.0193	12.7093	6.61937	8.98072	9.40928	4.33514	4.78928	10.5093	10.1053	8.83492	15.2493	15.2486	0.559279	13.4656	14.1107	11.3407	32.5793	6.16092	6.52928	9.69928	9.20548	10.4307	3.65928	2.68812	2.05072	1.94072	10.2693	8.89277	7.22706	7.06928	6.71674
bpalpgap		0.86763	121.111	27.4789	51.5389	3.04106	4.53106	19.8089	3.70106	0.611055	13.5911	10.7611	7.60894	6.55714	9.45106	16.2689	13.5862	10.5511	14.3889	10.7189	9.13396	12.2011	6.81894	1.5432	1.89894	11.6089	11.1907	9.82844	11.9089	11.9081	1.58894	12.8846	14.0211	10.6111	30.5789	3.33739	2.97894	8.16894	11.335	13.1111	2.46894	4.18621	3.67106	3.30106	10.0189	8.5454	6.79131	5.71894	5.35375
bpbpbas		1.69647	86.8545	19.3955	73.9055	35.4945	11.7555	16.7155	2.60554	7.36554	11.2345	19.7245	5.93554	7.42015	9.93446	16.6755	10.0868	7.60446	9.96554	13.1255	5.27931	8.23446	10.9555	6.17087	6.43554	7.72554	7.30507	6.0774	13.0955	13.095	1.17446	14.4703	15.5245	13.0145	33.6555	8.62018	8.10554	9.72554	8.17654	10.0745	3.93554	1.96838	1.60446	1.58446	7.68554	6.34091	4.68766	7.16554	6.80073
bpbpbbi		2.38261	103.43	67.4104	41.2304	43.0296	1.02961	12.5604	3.03961	2.94039	10.0896	18.0696	4.57039	9.20112	11.7196	14.0404	14.7988	11.2996	5.05039	10.1304	9.10705	11.7896	7.18039	2.21788	2.60039	5.63039	5.20347	3.98749	9.14039	9.1398	0.0203855	13.9482	14.7996	12.1296	29.9904	3.53037	3.61039	7.95039	10.8709	12.3596	3.62039	2.63157	2.06961	2.15961	5.32039	3.98761	2.31776	7.17039	6.80437
bpbpbn		15.8273	111.893	25.0773	41.8773	43.0327	10.9127	15.7173	2.50729	8.49729	9.48271	14.5427	4.22729	7.45866	9.51271	13.8873	7.96194	6.54271	12.8073	10.0473	5.72089	8.49271	9.61729	5.53253	5.69729	7.36729	6.9366	5.91647	9.87729	9.877	0.527293	10.7468	11.7627	10.8327	33.1273	12.0948	11.1473	8.10729	7.06265	9.08271	5.49729	0.596333	0.797293	0.357293	10.1673	8.94202	7.5352	5.10729	4.73492
bpbpbsb		1.45154	150.509	145.121	38.9508	54.6892	13.4508	15.2208	1.03076	6.34076	11.2592	16.9292	5.60076	8.22492	10.6192	16.1608	12.3267	8.92924	7.18076	12.2308	6.98282	9.59924	9.51076	4.52929	4.91076	7.34076	6.92481	5.68148	12.0108	12.0102	1.17924	15.1084	15.9092	13.4292	32.7708	6.43269	6.55076	9.04076	9.72009	11.1892	3.31076	2.9158	2.36924	2.45924	6.42076	5.08263	3.39426	6.52076	6.16192
bpoalpobte		31.143			26.0748	49.3952	3.11515	18.0548	4.38515	6.19485	5.09485	5.71485	9.17485	5.7848	9.22515	19.0548	16.9328	10.3652	14.7248	13.4848	8.15319	11.0452	9.96485	4.71821	5.34485	18.4848	18.1779	17.0021	22.3448	22.3446	8.57485	7.41962	8.22515	6.38515	40.0448	8.29217	9.62485	13.1048	8.35192	9.38515	10.0048	2.91744	3.93485	2.68485	11.7648	10.4965	8.8932	10.8048	10.5443
bpoalpogapo		21.4113			5.0058	19.9042	18.0958	16.5758	8.4642	2.6858	1.9658	4.3658	10.3258	4.92021	9.0342	19.2858	18.922	12.2442	13.0358	12.4458	9.90013	13.3142	7.7558	2.31981	2.9558	17.1958	16.8741	15.6958	18.8458	18.8455	8.3158	8.33903	9.5042	7.0942	37.9458	4.90733	5.8258	11.7258	10.5961	11.8842	7.5658	0.0746391	1.1458	0.114201	10.7458	9.29201	7.81249	7.6758	7.40777
bsalsbo		19.8256	37.8626	112.943	163.437	5.70258	0.767419	10.9374	0.182581	1.91742	1.50742	0.937419	5.08742	5.61481	7.39258	12.5474	8.38908	6.05258	9.53742	5.40742	9.20662	11.4726	1.89742	1.62189	1.40258	3.44742	3.18818	2.30256	3.34742	3.34731	3.70742	6.68223	7.37258	7.93258	29.9174	9.77774	9.65742	5.01742	9.02348	10.5226	2.00742	2.33011	2.02258	3.25258	9.97742	9.09933	7.81784	1.63742	1.41299
bsalsbse		19.013	291.477	74.9768	111.443	0.756805	17.8732	15.0332	0.486805	3.11319	1.04681	4.28681	5.01319	7.81789	9.90681	14.6132	11.9815	8.35681	13.1332	9.05319	8.81724	11.1068	4.53319	0.162385	0.563195	7.39319	7.11752	6.0357	8.37319	8.37303	1.93319	10.9011	11.5068	10.5668	33.9432	9.11736	9.58319	7.62319	9.73747	10.9668	2.47319	3.04026	2.48681	3.28681	7.95319	6.94538	5.38321	2.52319	2.283
bsalsegas		9.5364	240.771	68.5286	41.0114	9.9114	19.4614	11.1614	3.6086	2.8786	1.9386	0.1414	8.4514	4.96449	8.1286	16.4914	12.5934	9.5286	9.7614	8.9714	9.97735	13.3686	2.9814	1.67845	1.3886	4.7514	4.47514	3.28376	4.4114	4.41117	4.3114	9.41389	10.7386	8.8486	32.6014	6.0219	5.4414	7.5114	11.044	13.0886	1.5714	4.41972	3.9786	4.6286	3.8114	2.65329	1.01708	1.7714	1.53347
bsalsegate		12.1724	267.614	99.9939	32.4939	4.7161	16.5639	11.9939	6.4761	2.1861	2.4661	0.606103	7.9639	6.16888	9.5761	16.6839	15.2179	11.2761	10.5839	9.6939	10.5199	13.9061	3.8739	1.11288	0.716103	7.7139	7.43148	6.20091	8.2039	8.20365	4.2039	10.539	11.8261	9.6061	34.0539	5.42703	5.1939	8.2639	11.6611	13.5061	2.3939	4.13926	3.5161	4.2261	5.2939	4.05819	2.39408	3.0439	2.80333
bsalsgas		7.81153	31.1571	75.2071	66.7129	8.86288	8.58288	10.6229	3.26712	1.88712	4.85712	0.997118	7.92288	5.16798	8.03712	15.8829	11.9626	9.02712	9.51288	8.42288	9.95758	13.0871	2.12288	2.41985	2.13712	4.39288	4.12281	2.94618	2.98288	2.98266	3.21288	10.0719	11.2571	9.59712	31.3629	5.74046	5.28288	6.72288	11.2329	13.1371	0.302882	5.48652	5.05712	5.68712	4.58288	3.45752	1.84462	0.232882	1.833e-05
bsbalsbbas		4.88421	100.986	149.726	49.7337	76.1063	5.98374	10.5737	6.21626	3.34374	9.03626	11.8363	8.42374	6.20073	8.71626	17.8137	15.2328	9.49626	6.03374	12.1337	8.71984	10.7763	10.5737	5.13822	5.82374	12.6437	12.2336	10.976	15.2037	15.2028	2.80374	12.5585	12.9263	10.3763	32.5437	3.05174	4.58374	9.80374	10.8379	11.3763	6.39374	0.677611	0.333739	0.116261	5.20374	3.71759	2.14213	7.04374	6.69058
bsbbsbbas		0.620061	176.817	94.3772	32.1428	66.9872	25.5228	6.83279	5.40721	3.77279	11.6972	16.9672	6.07279	8.04179	10.6872	16.0428	15.2371	10.4072	1.27279	10.7928	9.19092	11.6272	9.35279	4.19071	4.71279	10.0028	9.58086	8.36374	11.9228	11.9219	0.707214	15.384	16.0372	13.9372	31.3328	3.17357	4.06279	7.91279	11.7907	12.8072	4.00279	2.65257	1.86721	2.48721	2.49279	1.04382	0.514194	4.52279	4.16337
bsbbsbbbi		0.705432	209.207	181.193	3.9831	83.3969	10.7531	4.3431	9.1369	1.1331	11.7469	18.0169	5.9231	8.23883	10.8069	15.1831	17.6289	11.5069	2.1769	8.8431	11.4156	13.4269	7.4731	2.25179	2.9031	8.5931	8.15803	6.99517	11.3931	11.392	0.1069	15.1213	15.4769	13.6969	29.4531	0.38752	2.1331	6.4831	13.605	14.0569	3.7831	3.08168	2.0769	3.0069	0.4331	1.07175	2.49984	3.7131	3.34562
bsbbsbbn		21.4752	20.0742	21.8558	2.75422	73.8258	0.155777	11.2342	3.01578	6.77422	4.76578	6.84578	5.17422	7.50691	10.0858	13.7142	12.9139	9.91578	8.46422	9.22422	8.48178	11.2958	10.1542	5.6312	5.94422	12.5242	12.1238	11.028	12.2442	12.2437	3.66422	9.19333	10.1858	9.16578	32.5242	8.10905	7.77422	8.49422	8.81609	10.4858	8.71422	3.00499	3.47422	2.59422	6.83422	5.60445	4.0819	7.71422	7.36949
bsbbsbbp		0.961496	184.332	89.3282	19.4782	70.2318	20.8982	10.8282	2.38183	5.06817	11.5318	15.7318	6.09817	8.08066	10.5518	16.3382	14.4169	9.80183	3.41817	11.4882	8.48119	10.8218	9.29817	4.13652	4.64817	9.05817	8.64072	7.40626	12.2582	12.2574	0.781831	15.3867	15.9818	13.7418	32.1382	4.2408	5.09817	8.44817	11.1844	12.1918	3.66817	2.92778	2.17183	2.60183	4.08817	2.69042	1.06342	5.24817	4.89109
bsealsebs		21.8654	267.287	21.2325	68.6875	5.58253	30.1375	13.9975	0.542528	1.14747	3.04747	2.41253	5.87747	7.29439	9.74253	15.4775	12.4139	8.69253	12.5175	9.80747	8.64672	11.2625	5.52747	1.03457	1.41747	6.05747	5.77579	4.67281	9.23747	9.23731	3.57747	9.71662	10.5025	9.40253	35.3775	9.52215	9.81747	8.73747	9.23894	10.6725	4.12747	1.59415	1.03253	1.93253	5.51747	4.47062	2.87865	4.12747	3.88296
bsealsebte		22.2861	214.798	202.768	61.0584	22.8316	27.9984	14.6384	3.63159	2.13841	0.568409	3.38159	5.94841	7.88447	10.7416	15.8984	14.809	10.3616	13.7584	10.7384	8.91103	11.7316	6.68841	1.886	2.33841	10.9084	10.6248	9.46713	13.5984	13.5982	3.52841	10.749	11.6216	10.0516	36.0084	8.13947	8.56841	9.53841	9.74651	11.1416	4.82841	1.42026	0.731591	1.63159	7.79841	6.67747	5.03855	5.31841	5.0746
bsealsegase		10.9352	4.30265	64.2126	58.5126	19.2526	42.0626	13.1426	5.44735	0.887352	1.17735	1.18735	8.53265	5.34962	8.77735	16.9526	14.2951	10.5574	10.6726	9.99265	9.83194	13.3074	4.07265	0.780552	0.417352	8.81265	8.52746	7.33987	8.09265	8.0924	4.40265	10.0389	11.3774	9.31735	33.5926	5.45044	5.08265	8.46265	11.0519	12.9974	2.38265	3.96934	3.39735	4.21735	4.62265	3.37844	1.79073	2.81265	2.5694
bsealtegapo		16.4137			41.7236	5.29643	18.2936	15.1036	7.40643	0.513566	0.0464336	1.36357	8.84357	6.09661	9.84643	17.8436	17.7395	12.3464	11.7036	11.0236	10.6415	14.0264	5.69357	0.392916	0.933566	12.8436	12.5447	11.319	13.8036	13.8033	5.92357	10.0325	11.2264	8.82643	36.0936	4.7781	5.16357	9.91357	11.5892	13.1164	4.73357	2.39281	1.52643	2.48643	7.71357	6.36701	4.75813	5.16357	4.91164
btealtebpo		27.7102			51.8849	30.8851	2.42489	17.4449	4.63511	5.42489	2.35489	2.20489	8.11489	6.82979	9.86511	18.1949	17.12	10.5251	14.5649	12.9749	8.56739	11.0851	9.28489	4.03814	4.71489	16.1549	15.8553	14.6706	19.9349	19.9347	6.57489	9.28131	9.84511	8.11511	38.7349	7.39594	9.01489	12.1449	9.17199	9.93511	8.19489	1.16682	2.21489	1.04489	10.3749	9.13726	7.51614	9.16489	8.91023
btealtebse		26.9745	101.182	163.962	68.9076	13.5624	11.5076	17.0576	2.35244	4.89756	3.81756	1.64756	7.15756	7.46737	10.3924	17.2276	15.9785	10.5224	13.2376	11.8376	9.04665	11.7324	7.60756	2.52817	3.08756	12.2676	11.9767	10.7843	16.1276	16.1274	5.79756	9.43757	10.1524	8.47244	38.1576	8.2219	9.23756	11.1076	9.44081	10.5624	6.85756	0.180228	1.03756	0.00244223	7.12756	5.98075	4.27555	7.59756	7.34805
btealtegate		16.6458	42.0577	58.7023	36.3477	19.8923	6.2177	14.7477	8.2723	0.587703	0.932297	0.752297	8.7077	6.72697	10.3523	17.9177	18.9801	12.9923	11.3177	11.5377	10.8779	14.0123	5.9577	0.433283	1.0677	12.8477	12.5515	11.2723	13.9777	13.9774	5.7677	10.7593	11.7623	9.2023	36.1877	3.78787	4.6377	10.3677	11.9047	13.1423	4.8977	2.5347	1.5423	2.4723	5.4777	4.13978	2.43733	6.5977	6.34849
ga3n3		16.0497	114.704	5.18439	6.48439	39.2044	18.9056	2.13439	10.2856	7.50561	21.0156	1.08561	14.4744	3.80904	1.69561	18.5544	3.62551	5.92561	0.454389	7.36439	7.31324	14.1356	2.03561	5.74533	6.36561	3.46439	3.03327	1.92632	2.97561	2.97605	3.92439	6.79146	10.6056	9.17561	24.5744	3.93812	1.49561	4.16439	10.1198	15.6356	6.14561	10.7936	11.5056	12.4556	3.30439	1.78424	0.466369	10.4156	10.7795
ga3o3		18.433	105.517	39.4927	112.217	52.1873	9.04266	7.95266	0.752657	6.18266	14.0127	4.35734	18.1373	10.0075	4.83734	20.9273	3.24449	0.887343	0.967343	9.27734	2.02914	8.39266	2.89266	5.54329	6.17266	0.0773432	0.135387	1.02022	3.91266	3.91289	5.72734	2.51387	6.12266	6.62266	22.3173	5.939	0.657343	5.49734	5.50062	10.6527	7.98266	11.3945	12.1227	13.9227	5.61734	4.6657	3.51315	15.4027	15.5838
ga3po3		9.34873			3.35774	14.2077	9.33226	14.3423	14.7477	3.11774	2.18774	1.32226	10.2323	5.18017	10.8577	17.4723	22.2394	17.4277	9.99226	10.5923	12.2441	17.4277	4.04226	1.58274	1.18774	15.6723	15.3165	14.0705	12.2823	12.2819	6.99226	10.1318	12.5877	9.15774	33.4223	0.341865	1.61774	9.59226	13.3653	16.1277	3.92226	3.92317	3.17774	4.28774	5.91226	4.19211	2.75171	1.53226	1.24676
ga3s3		4.67641	17.1259	44.8841	24.5559	15.3159	9.13409	4.20591	9.33409	6.80409	10.8741	0.495914	10.4659	2.7732	7.78409	16.4859	13.1197	12.6041	4.48591	7.98591	10.8799	16.4741	0.734086	5.48479	5.57409	3.83591	3.55024	2.22463	0.384086	0.384396	3.86591	9.93721	12.8441	10.0241	27.7059	1.15745	2.17409	5.85591	12.7613	16.7341	2.57409	8.75244	8.79409	9.30409	0.155914	1.2715	2.91459	4.55409	4.79321
ga3se3		0.719422	91.0972	127.827	38.6972	25.5572	27.6172	8.87718	11.1928	6.14282	6.03282	0.272819	10.0172	4.0078	9.16282	16.5072	16.3909	14.5628	5.87718	8.83718	11.4579	16.8528	0.577181	4.47897	4.38282	8.21718	7.91038	6.62109	3.23718	3.23685	4.31718	10.6165	13.3328	10.3528	29.4172	0.446881	2.20282	6.95718	13.1963	16.7228	0.872819	7.60447	7.37282	8.13282	0.147181	1.41301	2.94282	1.94282	2.1964
ga3te3		5.17991	20.1629	82.1029	22.9471	10.9229	5.8429	11.9271	13.9929	4.9429	4.6929	3.0229	9.2671	6.18926	11.6129	16.5671	21.5804	17.8729	7.6671	9.9671	12.7449	17.9329	2.3771	3.31393	3.0029	12.0271	11.7034	10.3276	8.4571	8.45675	5.1971	11.6764	14.1729	10.5329	31.7871	1.06623	2.8029	8.5771	14.1579	17.1329	1.7371	6.02052	5.4329	6.1829	0.9771	0.63787	2.32322	1.8371	1.57483
gaasgaasgan		3.46792	36.6988	38.4288	31.2888	8.35879	21.6412	9.58879	11.5612	4.66121	12.2312	4.77121	10.7388	2.56425	7.78121	16.2488	13.7048	13.3512	7.02879	8.96879	10.009	15.7812	3.47879	1.46625	1.59121	9.67879	9.23581	7.9218	7.84879	7.84785	5.51879	8.46869	11.5112	7.94121	27.1588	0.573039	3.03121	7.33879	11.4666	15.5512	1.79879	4.62648	4.68121	4.89121	2.17879	0.618079	1.07276	2.49879	2.11427
gaasgaasgap		3.05209	54.1117	34.1883	56.8283	7.5383	16.1517	16.0183	10.6517	3.4217	11.8117	6.7517	9.7183	4.54342	9.3717	15.9883	16.6298	14.9117	11.8883	10.5583	9.91462	14.9417	6.2883	0.830003	0.928303	14.6283	14.1725	12.7588	12.6183	12.6171	4.7983	10.3421	12.8617	8.4017	27.6283	1.13281	3.5417	8.7583	11.6111	14.8717	3.9183	3.2094	2.9617	2.6817	3.5183	1.71338	0.0903728	7.8083	7.42228
gaasgaasgasb		1.33913	67.8797	34.2997	45.4603	10.6197	11.2497	13.5003	12.9097	3.35972	10.3197	6.18972	9.32028	5.24258	10.0897	15.6503	18.7789	16.0997	10.0603	10.5003	10.6069	15.3897	6.91028	1.29531	1.53028	14.4003	13.9385	12.5488	13.6903	13.689	5.15028	10.5418	12.8797	8.37972	27.5703	2.4119	4.23972	9.01028	12.0877	14.9497	5.01028	2.4356	1.99972	1.86972	1.05028	0.778477	2.36129	10.1203	9.73205
gaasinasgap		0.396955	82.7442	16.8458	52.0242	11.7258	13.9558	15.9742	9.74582	1.70582	10.9758	7.64582	12.0842	2.2684	6.10582	17.8842	15.4048	11.6358	12.5142	12.6342	8.03587	11.6258	7.78418	2.25396	2.65418	14.9342	14.4672	13.135	15.2542	15.2529	7.33418	7.9998	9.51582	6.25582	29.0242	0.182959	0.665819	10.9642	9.64263	11.5058	5.83418	1.43022	0.775819	0.995819	2.84418	0.985201	0.437329	9.17418	8.7809
gaasinngap		3.73114	129.365	4.85521	26.1152	6.00479	26.5248	9.69521	9.94479	4.19479	14.7248	4.10479	12.7552	0.438642	4.47479	17.8152	11.9519	9.70479	7.35521	10.6752	8.13324	12.3048	3.91521	1.04697	0.904792	9.02521	8.57582	7.32095	8.24521	8.24423	6.69521	7.20566	9.17479	6.92479	27.4052	1.02395	0.574792	8.73521	9.92233	12.5448	1.89521	4.55099	4.24479	4.86479	2.04521	0.436038	1.0686	1.15521	0.767128
gabiinbigasb		4.77186	33.1824	520.332	15.6524	46.3724		10.4376	16.5824	3.81245	8.94245	7.37245	9.86755	4.84192	8.60245	15.9476	21.5051	14.7524	7.46755	10.4276	11.2735	14.0024	7.57755	1.81652	2.57755	13.2176	12.724	11.5295	17.5076	17.506	6.83755	9.54886	10.4324	7.14245	27.0676	4.69577	3.34245	9.47755	12.4266	13.0524	6.96755	0.932946	0.297554	0.392446	1.32245	3.25838	4.43424	10.6176	10.2089
gangapgaas		5.17536	13.1573	41.6427	20.4327	10.1927	29.0073	10.1027	11.4573	5.98729	14.8273	5.05729	9.81271	3.36666	8.53729	15.4227	13.7788	13.7473	6.55271	7.89271	10.8109	16.6273	2.03271	2.86864	3.03729	8.23271	7.78901	6.45502	5.68271	5.68182	4.01271	9.75029	12.8373	9.27729	26.0727	0.00714392	3.75729	6.01271	12.4835	16.6773	0.0172939	6.33507	6.46729	6.56729	2.51271	0.963846	0.760274	0.00729392	0.392274
ganinngap		9.25647	156.805	12.0252	14.5652	10.6952	27.6248	4.85525	9.38475	5.70475	19.7148	1.08475	14.7752	2.82842	1.30475	19.1952	6.94602	5.88475	3.42525	10.1352	6.63517	11.2648	0.885249	3.46497	3.57475	4.93525	4.49344	3.33916	2.34525	2.34453	6.00525	6.35166	8.66475	7.60475	26.5052	2.90262	0.515249	7.36525	9.14399	12.4148	2.33475	7.90572	7.93475	8.98475	2.05525	0.520089	0.854961	5.56475	5.94431
gaogasgase		9.02165	79.0511	26.0711	60.5011	29.5311	4.17112	0.388881	6.36888	5.89888	10.9889	0.781119	12.9211	1.21211	4.18888	17.8911	8.50058	9.04888	2.37112	8.42112	8.2386	14.4489	1.26888	5.3693	5.65888	1.97112	1.69923	0.527499	1.60888	1.60915	4.84112	7.35856	10.7089	8.87888	26.0711	2.3458	1.96888	5.92112	10.4916	15.1189	3.87888	9.24003	9.51888	10.5589	0.921119	0.355251	1.85337	7.95888	8.18823
gaoinogas		13.9927	49.7739	16.7561	106.544	22.7739	10.6361	3.61611	1.17611	3.44611	14.9561	3.95389	20.1839	10.3651	6.20389	23.5139	1.30993	1.82389	3.07389	13.2439	0.634191	5.34611	0.543889	2.83338	3.05611	2.63389	2.38297	1.4219	0.393889	0.393579	8.34389	1.86517	4.30611	4.99611	26.1539	6.11091	3.38389	9.48389	4.16091	7.59611	4.29611	8.7145	8.88611	10.7761	3.84389	2.68632	1.54283	11.2861	11.4957
gaoinotlo		11.4097	31.5519	15.9019	121.098	38.6781	11.0619	3.69186	3.75814	1.43186	11.8419	1.86186	24.9881	16.6545	13.2381	27.2181	7.81894	9.19814	3.50814	17.2281	5.45088	1.72814	2.90814	0.0948919	0.0718581	3.05814	2.80968	2.0496	5.26814	5.26779	13.0081	4.26706	2.41814	0.631858	27.6681	10.2487	8.58814	13.4881	1.89633	0.711858	1.47186	5.20607	5.27186	8.14186	6.78814	5.66681	4.88035	8.67186	8.87578
gapgapgaas		4.24942	86.5226	24.7674	41.8974	7.39736	26.8726	17.0974	10.4326	4.56264	13.8626	6.86264	8.95736	5.22924	10.0126	15.2874	16.6576	15.2926	11.9174	9.60736	10.6612	15.7626	5.01736	0.410398	0.352638	13.7874	13.3361	11.8931	10.9774	10.9762	3.60736	11.3534	13.9226	9.46264	26.8074	1.52066	4.11264	7.63736	12.4889	15.8726	2.38736	4.64831	4.48264	4.08264	4.23736	2.46249	0.779502	5.74736	5.36388
gapgapgan		6.51731	76.0836	45.9564	8.65644	14.2864	37.3736	10.8364	11.1636	6.99356	17.0136	5.18356	9.21644	3.8222	8.94356	14.9264	13.4952	13.7836	6.38644	7.16644	11.2369	17.0936	0.966441	3.88761	4.10356	7.02644	6.58211	5.22887	4.00644	4.0056	2.87644	10.6475	13.7736	10.2436	25.3164	0.227269	4.13356	5.05644	13.1069	17.4136	1.46356	7.66973	7.87356	7.85356	3.05644	1.51904	0.236139	1.98356	2.36896
gapgapgasb		3.45635	132.645	1.73532	13.9947	16.1753	34.0653	15.9347	12.2153	5.40532	14.0053	6.12532	7.87468	6.59869	11.3753	14.2947	18.8629	16.9553	10.3347	8.73468	12.0594	16.9953	4.48468	1.09142	0.955322	13.0947	12.6454	11.1884	10.5747	10.5735	3.02468	12.3627	14.8153	10.2653	26.0847	3.10352	5.35532	6.93468	13.77	16.9153	2.19468	5.09317	4.80532	4.43532	2.65468	0.895748	0.829452	6.35468	5.97399
gapinpgaas		1.95049	238.822	29.6724	33.4376	13.6224	28.4124	16.8876	9.25237	2.55237	12.9224	6.75237	11.4776	2.78112	6.58237	17.2876	15.2901	11.8924	12.3876	11.8376	8.60564	12.2724	6.62763	1.13394	1.48763	14.8476	14.3861	13.027	13.1876	13.1864	6.34763	8.78925	10.3624	7.09237	28.1176	0.608357	1.30237	10.0076	10.3351	12.3424	4.49763	2.66843	2.08237	2.20237	4.60763	2.78012	1.30255	7.32763	6.93843
gapogapogas		4.43563			5.58044	7.42956	4.48044	11.0004	12.8096	4.47956	4.99956	0.540437	10.2804	4.49915	10.0296	17.1104	19.2699	16.2196	8.05044	9.62044	12.0524	17.4896	2.37044	3.01321	2.79956	11.5904	11.2626	9.96639	7.94044	7.94009	5.95044	10.1469	12.8496	9.45956	31.5104	0.119087	2.09956	8.26044	13.4113	16.6996	1.69044	5.65111	5.19956	6.02956	4.12044	2.4952	0.948367	1.06956	1.33723
gapogapogase		5.9649			10.6371	2.64289	16.8671	12.5971	13.6129	4.37289	3.52289	0.567112	10.1571	4.85807	10.3929	17.1771	20.3463	16.6529	8.61711	9.96711	12.1324	17.4329	2.81711	2.64714	2.35289	13.2371	12.9006	11.6292	9.26711	9.26676	6.06711	10.3899	12.9629	9.62289	32.1771	0.0594277	1.89289	8.66711	13.4666	16.5329	2.22711	5.28057	4.71289	5.67289	4.06711	2.39963	0.911022	0.0128877	0.286048
gapogapogate		7.88234			8.12449	14.5655	2.52449	13.5245	14.5255	3.76551	3.03551	0.13551	9.85449	5.59464	11.1955	17.1445	22.0973	17.6655	9.20449	10.3445	12.4883	17.6855	3.44449	2.20944	1.84551	14.4545	14.1103	12.8188	10.9945	10.9941	6.36449	10.7002	13.1755	9.66551	32.8645	0.63719	2.08551	9.22449	13.697	16.5455	3.15449	4.6717	3.97551	4.95551	4.25449	2.56891	1.04355	1.51449	1.23744
gapoinpogate		8.80189			15.1574	32.4126	7.13741	14.3774	12.6826	1.40259	0.942585	2.88259	12.5674	2.87407	7.37259	19.3774	20.2817	13.7626	9.91741	12.9174	9.98239	13.6026	5.47741	0.236715	0.437415	15.3574	14.9923	13.7917	14.2174	14.217	8.99741	8.17102	9.57259	7.32259	34.1674	0.510305	1.07741	11.7874	11.2581	12.6026	5.35741	2.58897	1.46259	2.95259	4.26741	2.53931	1.20846	2.13741	1.84571
gapoinpotlpo		13.2711			10.232	37.862	2.02202	13.758	13.262	0.477983	1.77798	1.05798	14.538	0.705697	4.29202	20.338	20.0785	11.212	9.83798	15.158	7.62609	9.78202	7.52798	1.83321	2.81798	15.288	14.8673	13.8447	16.428	16.4276	12.398	4.8213	5.21202	4.57202	34.578	0.736373	3.30798	14.608	8.43495	8.31202	8.79798	0.751893	2.34798	0.0679826	3.82798	1.9714	0.998483	6.63798	6.30538
gasbgasbgap		2.02569	133.976	79.2757	5.53427	33.9257	31.2057	13.2943	14.2857	5.23573	12.5957	5.81573	7.54427	7.18996	11.9757	14.0643	20.847	17.9257	8.49427	8.72427	12.6498	17.3157	5.11427	0.604098	0.335728	12.9543	12.5013	11.0714	11.7743	11.7729	3.26427	12.6389	14.8857	10.3157	26.0443	4.30235	5.94573	7.16427	14.2173	16.9457	3.14427	4.44512	3.95573	3.74573	0.094272	1.69601	3.36198	8.32427	7.94287
gasegasegapo		2.57461			25.4237	10.6237	22.3037	10.6437	12.4763	5.49635	4.86635	0.0963463	9.94365	4.58524	9.93635	16.7137	18.4659	15.7863	7.11365	9.25365	11.9625	17.3263	1.57365	3.69535	3.50635	10.5637	10.2426	8.95786	6.12365	6.12331	5.08365	10.6156	13.2763	10.0963	30.7037	0.125804	2.17635	7.67365	13.489	16.8063	0.553654	6.57329	6.18635	7.01635	2.02365	0.408854	1.10729	1.27635	1.53936
gasegasegas		2.20666	68.1609	76.6809	33.2609	21.6809	14.9409	7.15091	10.6291	6.46909	7.72909	0.26909	9.98091	3.76263	8.86909	16.2909	15.4396	14.0991	5.27091	8.38091	11.4104	16.8791	0.0309102	4.92176	4.89909	6.53091	6.23037	4.92802	1.86091	1.86059	4.04091	10.4931	13.2791	10.3291	28.6009	0.49895	2.40909	6.44091	13.1739	16.8691	1.51909	8.06142	7.92909	8.57909	0.0709102	1.44824	3.01486	3.01909	3.26847
gasegasegate		1.22561	53.5564	67.0264	33.2264	13.0464	17.7464	9.66639	12.3736	6.14361	5.70361	1.44361	9.47639	5.02332	10.2636	16.2364	18.3641	15.9736	6.21639	8.91639	12.1835	17.5236	0.936394	4.33656	4.17361	9.05639	8.74479	7.4236	4.66639	4.66605	4.42639	11.1481	13.8036	10.5836	29.9564	0.265116	2.65361	7.24639	13.7682	17.1236	0.173606	7.25008	6.90361	7.64361	0.216394	1.36042	2.9488	1.06361	1.31973
gaseinsegas		0.53387	81.0925	215.503	44.9925	6.28251	18.3425	7.57251	7.87749	3.73749	6.25749	3.02749	13.2125	0.564453	4.57749	19.0325	13.2881	9.77749	6.23251	11.3525	8.56647	12.4475	2.39251	2.63031	2.29749	7.67251	7.35393	6.13654	5.75251	5.75216	7.23251	7.45854	9.16749	7.49749	30.3625	1.94171	1.11251	9.43251	10.3671	12.5275	1.07251	5.60742	5.04749	6.21749	0.762507	0.832333	2.17632	1.49749	1.75748
gaseinsegate		1.98062	163.512	349.462	41.7116	2.6284	20.6716	9.8716	10.0584	3.4984	4.8284	2.7184	12.8516	1.60855	5.7084	19.0916	15.9167	11.3384	7.0016	12.0416	9.08148	12.7684	3.1616	2.16324	1.6884	10.0316	9.69893	8.47165	7.2316	7.23124	7.3116	8.34382	9.8784	8.0084	31.4916	1.13098	0.861599	10.2016	10.8971	12.6984	1.9516	5.23907	4.4584	5.7184	0.621599	1.013	2.38277	0.048401	0.318021
gaseinsetlse		3.72287	72.7548	25.4352	35.9552	1.8852	10.4552	8.3952	7.7848	0.944795	2.9348	0.224795	15.1152	1.31604	1.7648	20.1552	13.5379	7.5348	6.1752	14.0352	6.13269	8.4648	4.5252	0.591085	0.0852048	10.2052	9.83465	8.76327	9.9752	9.97481	10.3652	4.6412	5.2848	5.1048	30.9752	1.85302	3.1752	12.5452	7.63058	8.2248	4.4352	2.49452	1.4348	3.3348	0.915205	0.857265	1.84261	2.4652	2.16902
gasgasgapo		0.292576			18.8644	2.39444	3.33556	7.55444	11.0156	5.76556	7.96556	0.194436	10.2944	3.73802	9.04556	16.7044	16.2326	14.6356	6.17444	8.69444	11.6176	17.1956	0.754436	4.33032	4.28556	7.61444	7.30799	5.98704	3.72444	3.72411	4.88444	10.0768	12.9356	9.76556	29.5144	0.584756	2.32556	6.97444	13.2112	16.9156	0.485564	7.25911	7.07556	7.69556	2.13444	0.609176	1.00623	3.10556	3.35903
gasgasgase		3.55331	44.1448	20.4348	28.7748	18.2548	2.69479	5.57479	9.99521	6.70521	9.35521	0.00520888	10.1448	3.33696	8.39521	16.2948	14.3414	13.4352	4.83479	8.11479	11.2017	16.7352	0.395209	5.24614	5.28521	5.10479	4.81158	3.49692	0.664791	0.664471	3.92479	10.2335	13.0852	10.1852	28.0248	0.730231	2.40521	6.09479	13.0099	16.8452	2.06521	8.42343	8.38521	8.94521	0.104791	1.36952	2.9744	3.90521	4.1496
gasgasgate		1.44809	2.13617	52.3362	22.0538	5.78383	7.06617	6.52383	10.9462	6.42617	8.82617	1.06617	9.84383	4.13655	9.31617	16.2738	16.0558	14.6962	5.26383	8.36383	11.791	17.3162	0.123834	4.95507	4.92617	6.00383	5.70657	4.35295	2.23383	2.2335	4.22383	10.5909	13.4162	10.2662	28.8438	0.293634	2.65617	6.53383	13.4633	17.1862	1.22617	7.93804	7.79617	8.33617	0.303834	1.18336	2.86352	2.80617	3.05282
gasinsgao		6.01781	15.2285	10.3015	49.1585	5.85847	2.45847	0.231527	3.36153	3.35153	9.35153	7.61153	15.3585	3.77657	0.541527	19.9785	6.17663	4.96153	3.44847	10.8385	5.61862	10.3615	0.728473	3.35152	3.40153	1.54847	1.2723	0.164783	1.66847	1.66817	8.15847	3.92116	6.29153	5.67153	27.7685	4.25919	1.79847	8.68847	7.53138	10.8215	0.881527	6.2178	6.17153	7.62153	2.56847	1.2474	0.0613074	5.94153	6.17113
gasinsgase		2.45504	20.6147	143.455	28.8753	2.2747	3.6853	6.4253	7.0847	3.4547	8.4547	1.6447	13.7653	0.287435	3.6547	19.4253	11.7394	8.6447	5.9653	11.5053	7.88846	11.8047	2.1053	2.80604	2.5347	6.6853	6.37413	5.1475	4.1053	4.10495	7.1153	7.16639	8.9147	7.3347	29.8053	2.26117	1.2353	9.3453	9.89705	12.1847	0.385295	6.10032	5.6247	6.7147	1.5753	0.025315	1.34937	2.6247	2.87974
gasinstls		0.0689484	43.1653	43.2653	24.0847	12.8753	19.5053	3.0047	4.9853	1.1453	8.9853	0.00530321	16.4847	3.43676	0.414697	21.1347	9.44057	4.7853	5.4047	14.0547	4.74135	7.3653	4.0947	0.724863	0.255303	6.3147	5.97169	4.84874	7.7047	7.70431	10.7647	3.1604	4.0653	3.9953	30.1747	3.30774	3.9047	12.2847	6.41254	7.5153	3.5547	2.83837	2.0753	3.7253	2.1347	0.469037	0.619083	0.514697	0.238347
gategategapo		6.51284			17.8625	13.5775	1.93747	12.7525	14.2575	4.35747	3.87747	1.53747	9.57253	5.90318	11.4275	16.8725	21.8774	17.8175	8.45253	10.1625	12.6467	17.8575	2.90253	2.77649	2.43747	13.2525	12.9195	11.5838	9.74253	9.74218	5.78253	11.2115	13.7075	10.1175	32.3725	0.850607	2.45747	8.90253	13.9623	16.8775	2.43253	5.36881	4.72747	5.59747	2.65253	1.00306	0.606527	1.62253	1.35352
gategategas		1.94495	12.7787	63.4187	21.1213	2.72874	4.86874	9.25126	12.3987	5.71874	6.63874	2.08874	9.57126	5.1711	10.4987	16.4313	18.8083	16.3787	6.42126	9.13126	12.3416	17.7387	1.22126	4.17806	4.00874	8.80126	8.49259	7.1202	5.28126	5.28092	4.75126	11.1135	13.8087	10.3687	30.3613	0.340002	2.75874	7.53126	13.8752	17.2687	0.251258	6.99739	6.63874	7.26874	0.691258	0.857602	2.5556	0.598742	0.852362
gategategase		3.36063	17.3927	1.19267	28.1827	1.12267	7.25267	10.8627	13.1173	5.55733	5.13733	2.15733	9.44267	5.53832	10.8773	16.4727	19.8874	16.8673	6.98267	9.49267	12.4183	17.6873	1.69267	3.79277	3.55733	10.5027	10.1858	8.83528	6.58267	6.58233	4.87267	11.3524	13.9373	10.5073	30.9627	0.563549	2.63733	7.95267	13.9275	17.1073	0.822671	6.59708	6.13733	6.87733	0.652671	0.942909	2.58305	0.372671	0.113881
gateintegapo		7.19771			10.945	38.635	0.844997	13.125	12.365	1.995	2.275	3.195	12.555	2.89743	7.325	19.375	19.7576	13.615	8.985	12.895	9.95877	13.605	4.965	0.766223	0.115003	13.605	13.2514	12.0097	11.985	11.9846	8.475	8.6051	10.025	7.735	33.775	0.427777	0.814997	11.555	11.4106	12.845	4.565	3.34729	2.275	3.665	2.435	0.739757	0.665513	2.735	2.45199
gateintegase		5.51543	100.411	262.871	26.9993	21.9907	11.3293	12.8293	10.0807	1.97069	1.74069	4.30069	13.1093	1.85877	6.10069	19.6393	17.1592	12.0307	8.55931	12.9793	8.98828	12.6907	4.72931	0.812462	0.270692	12.5393	12.2022	10.9429	11.1793	11.1789	8.62931	7.69683	9.21069	7.04069	33.1793	1.46778	1.40931	11.5193	10.4738	12.1507	4.17931	3.35633	2.46069	3.70069	1.88931	0.231008	1.19129	2.32931	2.05753
gateintetlte		9.16706	129.43	64.99	14.91	46.12	18.32	11.98	11.85	0.720011	0.260011	2.69001	14.17	1.06996	4.45001	20.01	18.8384	11.08	7.92999	14.99	7.60643	9.81001	6.25999	0.508329	1.40999	13.24	12.8567	11.7003	14	13.9996	11.08	5.85909	6.32001	5.47001	33.35	0.436699	2.53999	14.01	8.75601	8.87001	6.98999	0.961401	0.469989	1.45001	0.179989	1.58945	2.78418	6.75999	6.45603
ge3as3		2.53875	25.6872	86.4272	75.9128	49.4728	27.0228	11.2028	3.24278	2.24278	13.9072	8.74722	14.1128	1.82251	0.0427779	22.9228	5.54641	0.217222	5.70278	14.2128	3.61756	4.73722	7.37278	2.70891	3.44278	17.1528	16.9192	15.8348	10.0028	10.0025	0.267222	13.3913	13.3672	14.4972	32.4328	7.54785	9.34278	8.69278	9.08099	8.91722	2.00722	8.15478	7.08722	9.09722	6.94278	5.89354	4.4633	0.997222	1.1965
ge3bi3		2.47113	106.428	4.99206	14.1421		41.4579	16.3621	0.942057	4.97206	10.5979	10.6879	16.0121	3.4533	1.56206	23.4921	8.36255	0.757943	12.4721	15.7121	2.89731	3.53794	9.47206	4.59191	5.56206	23.4921	23.228	22.2221	26.8521	26.8517	4.21206	9.75769	9.34794	10.7979	32.8721	5.91033	8.99206	11.3621	7.41488	6.44794	2.53206	4.16791	2.68794	5.18794	13.4321	12.1466	11.0271	1.60794	1.82618
ge3n3		29.6272	84.4856	20.2356	58.5156	102.066	60.2256	4.11556	7.69556	4.38556	20.7244	3.08556	21.4956	11.678	8.40556	28.4856	7.58104	8.86556	1.33556	13.5356	0.0890805	3.98444	3.06556	0.13807	0.25444	9.72556	9.54132	8.59174	3.39444	3.3946	2.20444	12.0702	13.8444	15.9144	28.7556	9.23879	7.47556	5.00556	8.21361	11.0544	12.0844	16.1663	16.2144	18.5944	4.98556	4.3621	2.83004	17.6144	17.7755
ge3p3		4.14462	256.243	132.703	51.6068	54.3168	18.5668	14.0268	5.45677	1.75677	14.5332	7.46323	14.2768	2.69517	0.916774	23.7968	1.89872	2.08677	6.00677	14.3068	2.28958	3.71323	6.89677	2.49545	3.05677	10.8768	10.6574	9.54361	4.05677	4.05652	0.913226	13.0678	13.3232	14.6132	33.1768	10.4117	11.4068	8.37677	8.08706	8.41323	3.04323	8.72357	7.92323	9.70323	10.2668	9.34907	7.79728	0.0667736	0.121986
ge3sb3		5.07939	137.464	70.2257	19.2057	17.4857	12.0143	14.0257	3.0757	5.0357	13.6343	11.4443	15.7957	2.99247	1.1557	24.1457	7.05755	0.344295	9.2257	16.0157	2.81143	3.6343	9.5157	4.52841	5.4357	23.7457	23.5019	22.3875	21.5057	21.5054	1.9757	12.0312	11.7543	12.8243	33.0657	6.33669	8.9157	10.7657	8.14668	7.4643	0.565705	6.14801	4.8043	6.9743	10.7557	9.57461	8.2108	0.594295	0.798655
geasgeasgebi		0.567866	55.7009	61.5009	57.8991	34.3891	0.599068	12.5991	2.18907	2.62907	13.1909	9.22093	14.5791	2.15998	0.309068	22.9591	6.67591	0.710932	7.88907	14.6691	3.49215	4.50093	7.96907	3.21054	4.01907	19.7291	19.4872	18.4196	15.3191	15.3188	1.05907	12.385	12.2709	13.4709	32.4891	6.88348	9.00907	9.51907	8.66221	8.27093	0.620932	6.97976	5.79093	7.93093	8.97907	7.851	6.50771	1.23093	1.43539
geasgeasgen		10.5506	46.8435	34.7665	72.1235	75.5935	38.6235	6.86345	5.27345	3.10345	16.8665	5.87655	17.3335	5.78453	3.57345	25.4735	0.44128	3.51345	2.58345	13.7435	2.77932	4.77655	6.07345	1.89275	2.34345	11.8335	11.6126	10.5745	3.81345	3.81324	0.63655	12.7184	13.2665	15.1265	31.5935	8.47495	9.10345	7.08345	9.24806	10.0765	5.36655	10.8128	10.1265	12.4565	4.97345	4.11939	2.5924	6.49655	6.68765
geasgeasgep		3.08562	97.039	130.699	69.631	50.411	23.851	12.161	4.10098	1.94098	14.169	8.38902	14.081	2.02587	0.240981	23.141	4.39047	0.460981	5.75098	14.191	3.23264	4.46902	7.15098	2.57246	3.25098	14.871	14.6423	13.5466	7.87098	7.87072	0.539019	13.34	13.419	14.579	32.621	8.4574	9.95098	8.54098	8.80113	8.80902	2.39902	8.39229	7.41902	9.33902	8.05098	7.04804	5.5719	0.669019	0.864789
geasgeasgesb		3.04044	53.5149	38.6349	58.1251	39.2051	12.6951	11.8751	2.91511	2.71511	14.0349	9.54489	14.6251	2.17091	0.355112	23.2551	6.07301	0.364888	6.83511	14.8051	3.35037	4.39489	8.04511	3.26854	4.05511	19.5051	19.2686	18.1709	13.5851	13.5848	0.445112	12.9632	12.8749	13.9849	32.5751	7.12216	9.11511	9.37511	8.77288	8.46489	1.17489	7.5149	6.36489	8.41489	8.10511	7.01198	5.59774	0.594888	0.795548
geasgesbgebi		1.43174	89.6795	3.09046	38.2705		11.6695	13.5705	2.09046	3.55046	13.0595	10.1695	15.1405	2.56829	0.700458	23.3505	7.16788	0.719542	9.06046	15.2405	3.22392	4.12954	8.66046	3.80071	4.67046	21.7505	21.5049	20.4294	19.1405	19.1402	1.82046	11.9007	11.6995	12.8895	32.6705	6.47544	8.87046	10.1905	8.34184	7.77954	0.220458	6.31902	5.02954	7.23954	10.2505	9.07757	7.76128	1.04954	1.25585
geassnasgep		2.12552	16.4095	47.6305	58.9405	18.1205	33.3805	13.6105	5.39054	3.97054	11.3595	6.74946	16.5605	4.18088	2.44054	25.2905	3.5184	2.02054	7.28054	16.0505	1.92701	2.94946	8.79054	4.06166	4.82054	15.5405	15.3094	14.1998	12.4805	12.4803	2.45054	10.8086	10.7195	12.0695	34.7005	9.59512	11.5505	10.6905	7.25078	6.96946	0.120539	6.12136	5.01946	7.09946	7.59054	6.54567	5.08055	2.97054	2.77488
geassnasgesb		2.89005	49.6256	237.066	40.6944	6.9244	10.7344	12.3844	3.2544	3.5644	12.9256	8.4056	16.6244	3.89349	2.1144	24.9944	5.45848	0.824396	7.8344	16.2744	2.37495	3.2356	9.0844	4.16857	5.0344	19.2544	19.014	17.9059	16.1344	16.1341	2.6044	11.2102	10.9856	12.2256	34.0744	7.84575	10.1944	10.9644	7.72647	7.1656	0.364396	6.20928	4.9356	7.1256	7.5944	6.47303	5.05933	2.8644	2.66255
geassnsbpbbi		6.85806	137.147	80.2834	31.5966		27.9466	16.9134	0.913394	5.24339	6.22661	1.24661	18.1234	4.88042	3.14339	25.2734	8.12522	0.0466055	11.9434	17.8034	1.86414	2.23661	11.0634	5.89004	6.96339	22.2234	21.9568	20.8863	26.9234	26.9231	8.02339	6.70307	6.08661	7.56661	35.5434	7.35756	10.7934	14.1534	5.70303	4.42661	5.90339	1.18732	0.433394	2.10661	9.67339	8.38562	7.14633	13.9734	13.7549
gebigebigeas		0.917627	83.6228	31.9328	39.6972		21.9628	14.1872	1.19724	3.32724	12.2828	9.98276	14.9572	2.45616	0.577241	22.8672	7.8851	1.16276	10.0072	14.9372	3.47526	4.32276	8.44724	3.61718	4.50724	21.6272	21.3757	20.3342	20.7272	20.7269	2.33724	11.3833	11.1328	12.4328	32.3572	6.07526	8.62724	10.1972	8.31171	7.65276	0.677241	5.8654	4.53276	6.84276	11.0272	9.81836	8.58149	1.66276	1.87323
gebigebigen		5.69424	7.22625	2.87625	59.8263		3.08625	9.13625	3.74625	4.37625	15.4637	6.99375	18.5563	6.52139	3.81625	26.0063	2.51806	2.06625	6.53625	14.8063	2.69797	4.97375	7.44625	3.00438	3.52625	16.5263	16.291	15.2471	13.2963	13.296	2.18625	10.7393	11.4237	13.3637	32.5763	7.73666	8.36625	8.84625	8.60725	9.45375	2.47375	8.41538	7.57375	10.2237	9.25625	8.30443	6.8041	7.07375	7.27439
gebigebigep		0.90025	167.42	78.7504	29.5196		22.5504	15.7296	2.76961	3.86961	12.2904	9.22039	15.4496	3.13405	1.20961	23.6096	6.27829	0.120387	10.7296	15.4996	2.58747	3.60039	8.70961	3.94625	4.76961	20.2396	19.9946	18.9339	18.8896	18.8893	2.53961	10.9049	10.7904	12.1004	33.1496	7.51927	9.69961	10.5996	7.55737	7.12039	0.749613	5.66089	4.43039	6.64039	12.6896	11.5297	10.2303	0.490387	0.696147
gebigebigesb		0.104874	123.329	47.891	15.771		32.709	15.621	1.70103	5.02103	11.609	10.949	15.971	3.32059	1.44103	23.741	7.92429	0.618971	11.421	15.851	2.84953	3.55897	9.50103	4.58182	5.53103	23.661	23.4041	22.3609	25.091	25.0907	3.48103	10.513	10.149	11.459	32.961	6.05505	8.96103	11.191	7.65006	6.77897	1.88103	4.82882	3.39897	5.77897	12.561	11.3099	10.1075	1.33897	1.55235
gebisnbigesb		1.72817	156.029	426.159	1.72878		40.9388	17.4312	2.34122	6.00122	9.25878	9.31878	17.7012	4.80072	2.92122	25.3512	7.30977	0.421219	12.9012	17.3212	1.82689	2.41878	11.0012	5.95233	6.96122	24.2012	23.9387	22.885	28.8112	28.8109	5.76122	8.59856	8.14878	9.55878	34.8312	7.24539	10.3912	12.9112	6.42256	5.36878	3.98122	2.94319	1.40878	3.90878	12.8412	11.5722	10.3553	2.88122	2.66531
gengengeas		16.328	78.3835	0.676504	60.9835	83.8835	44.3035	5.4535	5.7435	3.4735	17.9765	0.526504	18.9735	8.14095	5.8735	26.5335	2.81428	6.1835	1.7735	13.1035	2.17707	4.4965	4.3635	0.633366	0.893496	9.8735	9.67179	8.69377	0.403496	0.403316	1.1065	12.2278	12.9765	15.2865	30.4035	8.79761	9.0735	5.8335	9.14029	10.4065	8.2965	13.109	12.6665	15.1265	4.7435	4.00486	2.5096	11.2565	11.4304
gengengebi		10.1309	45.8893	4.3907	38.0993	75.8393	21.2493	6.8693	5.6093	4.3693	16.5107	0.220698	19.1793	8.31186	5.8793	26.3493	1.92391	5.3993	3.8093	13.4493	2.03989	4.4107	5.1593	1.34147	1.6293	12.9693	12.7682	11.7853	5.2293	5.22912	0.699302	10.6211	11.4207	14.0107	31.0693	9.16282	9.3793	6.8193	8.44437	9.6807	6.1107	11.103	10.6007	13.2607	6.7393	5.94208	4.48681	10.0507	10.2214
gengengep		18.4581	11.2948	20.6448	56.0852	87.7952	45.7752	6.21517	5.96517	3.46517	18.4148	0.314829	18.8652	8.1834	5.85517	26.6152	3.54242	6.55517	1.73517	13.0152	1.97423	4.44483	3.99517	0.329601	0.535171	8.20517	8.00687	7.01644	1.49483	1.49501	1.61483	12.5097	13.3648	15.5448	30.2052	9.0477	9.07517	5.55517	9.1004	10.5548	8.97483	13.6709	13.3048	15.6248	5.68517	4.97615	3.44566	11.6548	11.8265
gengengesb		13.1005	122.849	99.2187	42.9387	74.8487	33.1487	5.77874	5.88874	4.22874	17.7313	0.881262	18.9787	8.11564	5.76874	26.3687	2.2506	5.62874	2.51874	13.2687	2.1544	4.48126	4.87874	1.06028	1.33874	11.6787	11.4802	10.48	3.22874	3.22856	0.161262	11.4177	12.1913	14.7013	30.7487	9.00582	9.22874	6.35874	8.81601	10.0513	7.02126	11.9803	11.5013	14.0613	5.43874	4.67239	3.17013	9.69126	9.86057
gengepgeas		11.3257	34.6318	63.5018	66.5682	76.0082	34.8482	7.79816	5.79816	2.81816	17.0818	5.42184	17.1582	5.82665	3.70816	25.4982	0.404236	4.12816	2.75816	13.6482	2.49349	4.46184	5.76816	1.66865	2.07816	10.0782	9.86195	8.8197	1.99816	1.99795	0.981844	12.7688	13.3118	15.2218	31.5182	9.01889	9.58816	6.89816	9.02848	9.88184	5.81184	11.1166	10.4818	12.7218	6.09816	5.27533	3.73283	6.45184	6.6392
gengepsip		15.3473	607.678	37.0016	68.1884	33.3484	42.4484	15.0184	12.6284	5.85837	13.9816	9.25163	19.4684	8.41653	6.66837	28.0484	4.23893	7.83837	4.55837	15.6384	0.0119932	1.61163	6.79837	2.7918	3.21837	6.50837	6.29835	5.26285	0.918373	0.918183	0.511627	11.8846	12.2316	13.9316	32.4784	10.9538	11.7084	8.13837	7.23498	7.89163	6.44163	11.5572	10.9316	12.8316	5.68837	4.94121	3.36708	3.81163	3.99459
gensnngep		27.4652	14.0622	97.6822	42.5222	60.2922	52.4622	6.31217	8.29217	5.89217	20.7278	2.18783	23.5322	12.51	9.84217	30.7522	6.19536	9.45217	3.35217	17.1822	1.59686	1.13783	6.03217	2.20131	2.41217	9.76217	9.56404	8.52775	2.85217	2.85195	0.322172	11.0889	12.0978	14.0178	31.4922	9.27683	9.21217	8.68217	6.63284	8.20783	8.73783	13.7121	13.3178	15.6478	4.39217	3.64994	2.06225	11.5678	11.7381
gepgepgeas		3.62485	174.491	144.611	61.4991	51.9891	20.6191	13.0691	4.77907	1.73907	14.4009	7.98093	14.0791	2.25077	0.459069	23.3791	3.25064	1.15907	5.82907	14.1791	2.84653	4.19093	6.95907	2.46624	3.07907	12.7291	12.5051	11.3993	5.84907	5.84881	0.790931	13.2782	13.4509	14.6609	32.8391	9.36048	10.5891	8.39907	8.51899	8.69093	2.76093	8.60107	7.72093	9.57093	9.10907	8.15077	6.63254	0.350931	0.543211
gepgepgebi		1.345	217.448	122.088	38.622	38.572	5.42801	14.872	4.42199	2.84199	13.568	8.28801	14.922	2.95398	1.06199	23.762	4.00756	0.91199	8.49199	15.102	2.28072	3.56801	7.93199	3.3352	4.01199	15.982	15.7505	14.6547	11.322	11.3217	0.89199	11.9216	12.038	13.298	33.242	9.06543	10.522	9.67199	7.67968	7.69801	1.01801	7.07778	6.07801	8.04801	11.472	10.4356	8.99139	0.15199	0.0448396
gepgepgen		11.9147	120.975	68.575	58.525	77.915	33.755	8.90498	6.30498	2.81498	17.115	4.69502	17.155	6.02614	3.99498	25.705	1.38957	4.90498	3.03498	13.655	2.12301	4.04502	5.58498	1.56351	1.94498	8.54498	8.33347	7.28728	0.374985	0.374785	1.22502	12.7326	13.265	15.225	31.685	9.76292	10.295	6.78498	8.75365	9.63502	6.17502	11.3433	10.765	12.915	7.31498	6.52217	4.96539	6.19502	6.37866
gepgepgesb		3.58081	214.532	49.0724	40.9776	41.3176	6.6476	14.0476	4.9376	2.8876	14.3924	8.5524	14.8876	2.89395	1.0476	24.0076	3.43978	1.2476	7.3676	15.1076	2.24952	3.5524	7.9376	3.32681	3.9876	15.4776	15.2515	14.1276	9.5976	9.59733	0.247601	12.5209	12.6624	13.8624	33.3376	9.32686	10.6876	9.4176	7.88137	7.9524	1.6124	7.64836	6.6924	8.5724	10.5476	9.54734	8.03489	0.677601	0.484491
gepsnaspbsb		3.60108	215.79	319.91	4.10035	27.5397	4.32035	14.6803	2.45035	4.58035	8.46965	0.579652	18.1803	5.26255	3.59035	25.7103	5.73341	1.31035	9.91035	17.8103	1.17805	1.74965	10.2603	5.2428	6.18035	18.2703	18.021	16.9085	20.2103	20.21	6.84035	7.29456	6.85965	8.39965	35.6003	8.70579	11.6003	13.6303	5.44921	4.53965	4.27035	2.48824	1.08965	3.42965	7.29035	6.11033	4.74121	13.9903	13.7837
gepsnpgeas		4.09938	252.24	206.62	36.2996	14.0196	27.9496	14.7096	6.16962	3.94962	12.4904	6.10038	16.8696	4.67831	2.97962	25.7496	2.23581	2.92962	7.63962	16.3796	1.25832	2.33038	8.68962	4.03511	4.74962	14.5596	14.3333	13.2139	9.65962	9.65934	2.08962	10.8942	10.8504	12.2104	34.6096	10.1277	11.8896	10.7096	6.86487	6.70038	0.490385	6.59546	5.56038	7.54038	9.56962	8.56705	7.06261	2.93962	2.74756
gepsnpgen		9.01343	142.477	112.997	56.0932	30.4332	50.0732	12.9232	8.83321	6.31321	10.2968	2.58679	19.8232	8.03355	6.04321	27.9632	1.6231	6.09321	5.71321	15.7132	1.07802	2.79679	7.88321	3.64061	4.11321	11.5632	11.3534	10.2732	6.66321	6.66298	3.31321	8.97436	9.31679	11.2468	34.5932	10.9672	12.1232	9.68321	6.88269	7.45679	1.84679	7.35898	6.62679	8.90679	10.2832	9.43582	7.86603	1.53679	1.71813
gesbgesbgeas		4.09978	90.7228	14.1772	38.9972	28.3872	0.462845	12.6372	2.65716	3.43716	14.1228	10.6528	14.9472	2.32901	0.497155	23.4172	6.80755	0.632845	7.82716	15.1872	3.29082	4.23284	8.55716	3.67387	4.51716	21.4972	21.2572	20.1496	17.2372	17.2369	0.987155	12.7088	12.5428	13.6228	32.5472	6.49401	8.74716	9.85716	8.66133	8.18284	0.502845	7.03012	5.78284	7.89284	9.18716	8.04914	6.65833	0.702845	0.905225
gesbgesbgebi		2.66445	133.6	69.9803	16.8803		22.9397	14.8803	2.43034	5.06034	12.6297	11.2097	15.9403	3.21077	1.35034	24.0003	7.44279	0.439656	10.3503	15.9903	2.77814	3.54966	9.53034	4.57671	5.51034	23.8103	23.5598	22.4808	23.3303	23.33	2.74034	11.263	10.9497	12.1397	33.0503	6.22334	8.96034	11.0103	7.87072	7.09966	1.21034	5.5023	4.10966	6.38966	11.7003	10.4835	9.20055	0.989656	1.19867
gesbgesbgen		10.4897	90.8826	124.833	45.5726	61.6626	18.2126	7.27263	4.79263	4.17263	17.5074	8.25737	18.0326	6.06624	3.49263	25.9426	1.73235	2.42263	4.06263	14.5126	2.78678	5.03737	7.15263	2.71512	3.20263	15.3726	15.1484	14.0562	9.70263	9.70241	0.622635	12.1018	12.7974	14.5674	32.1026	7.79926	8.27263	8.09263	9.11062	10.0274	3.81737	9.67626	8.90737	11.3474	6.78263	5.88309	4.28669	5.97737	6.16988
gesbgesbgep		3.99574	173.54	11.7795	29.9395	29.4895	1.99046	13.8895	3.97954	3.81954	14.2105	9.94046	15.2295	2.82835	0.959542	23.9395	5.34695	0.259542	8.32954	15.5195	2.58317	3.68046	8.65954	3.85145	4.62954	19.6495	19.4158	18.2911	15.2395	15.2393	1.07954	12.3083	12.2705	13.3805	33.1395	7.80783	9.69954	10.0695	8.04886	7.78046	0.530458	6.91366	5.77046	7.78046	10.6295	9.54089	8.09124	0.319542	0.121532
gesbsnsbgeas		1.87338	154.7	127.53	14.1902	1.90981	0.150195	15.2402	3.97019	5.11019	10.5498	8.52981	17.0502	4.15787	2.34019	25.3502	5.96721	0.730195	9.43019	16.8302	2.13212	2.91981	10.2302	5.21205	6.13019	22.0102	21.7666	20.6478	21.9002	21.8999	3.84019	10.2529	9.95981	11.1898	34.7202	7.9018	10.4802	11.8702	7.17827	6.46981	2.11019	4.64074	3.27981	5.52981	9.59019	8.42417	7.03175	3.34019	3.13712
gesbsnsbgebi		1.53499	136.648	374.562	0.811658		32.3983	15.7317	2.47166	5.43166	11.1683	9.51834	17.6517	4.67188	2.82166	25.5417	6.87863	0.541658	11.4417	17.2917	1.93172	2.57834	10.7517	5.67028	6.66166	23.4217	23.1657	22.0782	25.5017	25.5013	4.79166	9.57518	9.15834	10.4483	34.6017	7.12149	10.0917	12.4917	6.88903	5.92834	2.92166	4.00404	2.50834	4.90834	11.4417	10.2053	8.91331	3.45166	3.24039
in3n3		6.51434	46.7545	74.5445	41.5155	10.3945	5.69546	3.13546	3.02454	0.174536	17.2945	15.7845	24.0555	13.1454	10.8755	26.9055	2.4523	6.55546	4.74546	17.0655	1.78173	0.334536	5.61546	1.67834	1.90546	6.10546	5.63077	4.75047	10.1555	10.1547	14.6755	3.31853	2.66546	0.275464	31.5455	9.48329	10.3855	14.3355	0.717336	1.72454	3.15546	1.93761	1.47454	3.94454	6.61546	4.91966	4.17739	3.49454	3.8896
in3o3		12.1717	10.5221	37.0921	137.298	5.49792	16.2079	0.942078	8.03792	1.43792	12.3521	14.1221	29.4979	20.9498	18.5679	31.5679	11.4428	14.7379	6.25792	21.4579	9.34408	7.04792	5.64792	2.72813	2.81792	4.01792	3.7676	3.04762	9.19792	9.19753	15.9379	6.91478	6.05792	2.13792	30.5779	12.5947	12.8779	17.1279	5.17601	3.91792	0.297922	3.59486	3.31208	6.48208	7.75792	6.60185	5.93857	8.64208	8.84549
in3po3		10.9947			0.103164	58.1232	17.6968	15.5968	9.69316	3.22684	2.54684	5.29316	18.1468	2.81082	0.246836	24.0968	16.6339	6.02316	11.4568	17.9768	4.96832	5.74316	9.66684	3.87826	5.12684	16.1968	15.772	14.7972	19.7868	19.7864	14.3468	3.01267	2.43316	2.68316	37.1768	3.14077	7.47684	16.8368	6.3958	4.98316	9.79684	1.62225	3.58684	1.00684	4.90684	3.05764	2.1791	2.89684	2.56198
in3s3		1.24939	19.4784	104.568	34.8716	39.1384	4.44158	4.65158	0.508422	2.28158	8.83842	6.40842	20.8416	7.71455	5.78158	25.3816	5.5889	1.02158	7.47158	17.6316	1.301	2.42842	6.73158	1.8306	2.58158	6.81158	6.46292	5.39781	11.0716	11.0712	13.6716	0.392642	0.258422	1.13842	32.9716	5.82837	8.38158	15.3616	3.50022	3.19842	5.21158	1.30089	0.148422	2.13842	3.61158	1.9228	0.979378	0.788422	1.0677
in3se3		2.35569	36.9941	34.5841	55.7841	15.6059	34.7741	10.0541	3.75595	2.57405	2.31595	6.44595	19.3141	5.42888	3.44405	24.3041	9.76718	1.81595	7.97405	17.3841	2.92938	3.76595	6.95405	1.75144	2.71405	10.8241	10.4474	9.43329	13.3241	13.3236	13.0041	2.14476	1.75595	2.53595	33.7641	4.38342	7.65405	15.3541	4.99559	4.18595	5.81405	1.23914	0.214051	2.02595	1.95405	0.172371	0.684939	0.794051	0.494441
in3te3		7.27286	70.902	74.008	25.852	71.178	9.63201	13.652	8.21799	2.16201	0.642007	9.21799	17.962	2.67859	0.352007	23.832	15.2419	5.69799	9.41201	17.932	4.74866	5.51799	8.44201	2.61156	3.78201	13.992	13.6034	12.5009	17.302	17.3016	13.272	3.75884	3.23799	3.30799	35.892	2.85718	6.77201	16.402	6.47806	5.26799	8.11201	0.0520373	1.86201	0.387993	1.01201	0.753273	1.83816	3.82201	3.51502
inninninp		2.16882	45.2886	108.349	19.5614	31.5486	11.4186	6.2114	4.7086	0.538602	15.5286	12.7286	20.7414	8.7191	6.5814	24.3114	3.05404	2.0214	6.2714	15.9414	1.08825	2.7986	6.1214	1.64242	2.0914	7.2414	6.77043	5.77289	11.4014	11.4005	13.4814	0.809378	0.481398	0.928602	31.0714	6.73313	8.2514	13.8214	3.05118	3.5286	4.6414	1.19126	0.448602	2.5186	4.8714	3.20113	2.23491	0.328602	0.727222
inninpinas		1.94999	44.7027	103.043	20.3873	45.1627	16.5027	10.3773	6.46274	0.387259	11.9027	10.1427	18.3773	5.14589	3.11726	22.5573	8.34861	2.01274	9.19726	15.9973	3.00698	4.27274	8.12726	3.05929	3.76726	10.7373	10.2658	9.17434	15.2473	15.2461	12.9973	1.17029	1.13274	1.39274	31.1473	4.09733	6.38726	14.3873	4.56322	4.39274	7.21726	0.538449	1.64726	0.0127409	3.12726	1.38464	0.313149	5.15726	4.75654
inntlninp		2.01806	125.793	63.3468	4.24679	10.9332	22.8332	5.33679	6.80321	1.67321	14.1732	7.79321	19.4168	7.61789	5.40679	22.5168	4.68557	0.416792	5.61679	15.1768	1.57751	3.33321	5.68679	1.27567	1.70679	6.98679	6.49379	5.53842	11.5268	11.5258	14.0968	1.5904	1.21679	0.463208	29.8168	5.74211	7.22679	13.7768	2.84902	3.33321	5.56679	0.208518	0.536792	1.69321	4.41679	2.70069	1.82206	2.88679	2.46991
inoinsinse		4.26975	2.76964	33.9804	80.2196	20.2004	16.6696	3.22964	1.57964	2.40964	7.68036	10.3904	23.4496	11.6235	9.32964	27.2796	0.984336	4.68964	6.20964	18.9496	1.8999	0.209644	6.30964	2.00551	2.54964	5.73964	5.42091	4.47375	10.2896	10.2893	14.4496	1.75622	1.46964	0.410356	32.3696	7.58747	9.32964	16.0896	0.881356	1.19036	3.71964	2.04788	1.15036	3.68036	3.53964	2.00362	1.15922	3.54036	3.7979
inotloins		7.18807	57.2316	68.2316	116.688	4.08839	7.20161	0.401614	3.62839	1.69839	11.2216	10.7716	26.1584	16.3415	13.8784	28.7284	5.23662	9.43839	5.59839	20.2984	6.25315	4.10839	6.06839	2.58137	2.83839	5.06839	4.76886	3.96435	10.4784	10.478	15.5084	5.00884	4.29839	1.01839	30.4484	9.7434	10.5184	16.8884	2.94592	1.99839	2.42839	2.24756	1.73161	4.73161	5.42839	4.05263	3.36393	4.40161	4.64335
inpinpinas		2.88381	37.261	206.191	20.299	53.161	24.181	16.159	7.111	1.229	11.411	9.181	16.609	2.38187	0.548995	21.369	12.1847	4.761	13.559	16.379	4.15518	4.981	10.219	4.65258	5.579	15.969	15.4696	14.298	19.079	19.0776	11.739	3.58398	3.191	2.361	30.829	1.57075	4.669	14.759	5.76552	5.041	8.779	1.4271	2.809	1.659	3.429	1.51142	0.440875	9.939	9.52335
inpinpinn		0.946101	39.4292	175.869	8.71083	46.1892	24.4992	10.6108	5.95917	0.459173	14.0892	10.8792	18.0708	4.96997	2.99083	22.2508	7.94447	1.89917	9.18083	15.4908	3.23101	4.52917	7.47083	2.45091	3.12083	10.4708	9.9977	8.88849	14.1508	14.1497	12.3108	1.63267	1.63917	1.92917	30.5608	3.97738	6.16083	13.7308	4.90293	4.82917	6.33083	0.238243	0.800827	0.779173	4.12083	2.39177	1.2897	3.55083	3.14876
inpotlpobpo		24.0679			12.6995	42.0105	6.2195	15.0495	9.8505	4.8495	5.9495	5.2895	14.5095	0.749124	4.0005	21.2495	18.4176	9.2605	12.0595	17.1495	5.4605	7.3905	10.9295	5.40098	6.3795	18.5695	18.2046	17.1636	21.5695	21.5691	14.0495	2.94512	3.1005	2.9905	38.1095	4.40853	7.3495	17.0795	5.65322	5.4105	12.7695	5.00674	6.5895	4.1195	7.0795	5.41043	4.32704	12.3795	12.0826
inpotlpointe		12.2714			3.19525	55.7747	5.53475	13.6853	11.1947	2.04525	2.46525	2.19475	16.9253	1.74409	0.814748	22.3053	17.8451	7.57475	9.76525	17.4453	5.25882	6.07475	8.80525	3.04301	4.26525	15.1653	14.7304	13.7528	18.5953	18.5948	14.2653	2.9036	2.38475	2.82475	35.3553	1.80848	5.94525	16.7153	6.2762	4.95475	9.93525	1.82143	3.73525	1.11525	2.56525	0.698072	0.175018	6.12525	5.7826
inptlpinn		4.41102	25.0094	277.709	23.8794	44.7594	37.8194	8.72055	8.24945	1.18945	13.0494	2.86945	16.5006	3.46353	1.34055	20.2806	10.0893	4.04945	8.01055	14.5206	4.16028	5.58945	7.39055	2.39111	3.04055	10.1706	9.68095	8.59578	14.5406	14.5394	12.9306	1.01057	1.09945	1.43945	29.3706	2.74759	4.82055	13.5806	5.03743	5.04945	7.99055	1.4165	2.44055	0.780553	3.58055	1.80347	0.758463	7.78055	7.36565
insbinbiinp		6.38747	21.6463	149.226	14.1337	60.2363	27.4563	14.1437	12.5263	0.526261	9.10626	7.32626	14.8037	0.0508585	1.90626	19.9137	16.8387	7.76626	11.3337	14.9137	6.73123	7.24626	9.72374	3.90845	5.05374	15.3837	14.8822	13.7599	19.4537	19.4522	10.7637	5.52131	4.86626	3.84626	30.0937	1.29353	2.68374	13.6237	8.17303	6.86626	8.80374	0.914979	2.65374	1.22374	0.633739	1.3092	2.30927	11.4337	11.0185
inseinseins		1.11523	20.0462	7.47375	50.2362	23.8538	24.3262	8.20625	2.63375	2.41625	4.46375	6.55375	19.8062	6.16896	4.19625	24.6462	8.38347	0.913754	7.72625	17.4362	2.42634	3.37375	6.82625	1.71929	2.60625	9.38625	9.01997	7.98573	12.5062	12.5058	13.1962	1.5954	1.29375	2.10375	33.4762	4.85261	7.85625	15.3262	4.53803	3.91375	5.54625	1.33126	0.0162461	2.12375	2.46625	0.715616	0.174834	0.166246	0.125944
inseinseinte		3.89473	49.0118	8.97184	46.0518	34.2982	27.4118	10.9018	5.38816	2.14184	1.36816	7.54816	18.7018	4.37264	2.28184	23.9718	11.6735	3.23816	8.22184	17.4018	3.66691	4.47816	7.31184	1.90213	2.93184	11.6118	11.2317	10.1865	14.4518	14.4514	13.0018	2.74559	2.30816	2.85816	34.2818	3.7582	7.22184	15.5718	5.58758	4.64816	6.49184	0.88931	0.68184	1.54816	1.47184	0.30515	1.23875	1.51184	1.20994
insetlsebse		14.1612	6.15244	68.0176	62.6176	6.76244	19.9076	11.7676	3.53244	3.84756	2.63756	0.0724444	13.7976	0.0131856	2.65244	20.0276	12.6242	6.50244	10.5476	15.6176	4.33731	6.41244	7.98756	3.05666	3.72756	13.5576	13.2297	12.1653	14.4876	14.4872	11.0576	3.65019	4.05244	4.38244	34.5776	5.84652	7.43756	14.6476	5.16292	5.64244	8.21756	1.60738	2.64756	0.597556	4.68756	3.17191	2.02345	7.26756	6.99768
insetlseins		3.70778	0.0391355	197.769	48.4909	18.8291	5.24086	6.43086	4.29914	1.76086	4.01914	1.53914	18.6809	5.19676	3.10086	23.1109	9.89024	2.45914	6.50086	16.9309	2.75442	3.79914	6.50086	1.43856	2.31086	9.46086	9.07233	8.07353	13.1009	13.1004	13.5509	1.14797	0.929136	1.97914	32.3809	3.9084	6.80086	15.3609	4.35631	3.79914	6.49086	0.358716	0.980864	1.31914	1.70086	0.105766	0.918086	2.71086	2.40219
insetlseinte		6.23889	223.521	316.521	33.9286	30.3114	6.77858	9.54858	6.79142	1.68858	0.811419	4.18142	17.9886	3.85878	1.66858	22.7986	12.6768	4.29142	7.06858	17.1186	3.70028	4.59142	7.08858	1.73727	2.74858	11.2986	10.894	9.89064	13.9586	13.9582	13.4286	2.17109	1.80142	2.65142	33.1786	2.92626	6.29858	15.6986	5.2404	4.36142	7.26858	0.064539	1.48858	0.901419	0.828581	1.00047	1.85043	4.52858	4.20805
insinsinse		0.0517753	1.87948	53.6905	43.5795	31.7805	14.2995	6.50948	1.50052	2.34948	6.60052	6.50052	20.3795	6.99338	5.03948	25.0795	6.91774	0.0994828	7.63948	17.5795	1.82458	2.86052	6.78948	1.78215	2.59948	8.11948	7.76271	6.71111	11.8295	11.8291	13.4695	0.962047	0.750517	1.60052	33.3195	5.4405	8.20948	15.3795	3.99072	3.53052	5.38948	1.30879	0.0605172	2.13052	3.04948	1.33	0.410243	0.220517	0.505787
insinsinte		1.63301	5.05019	94.2198	30.8902	50.1998	6.72019	7.34019	3.04981	2.18019	5.49981	7.81981	19.8702	6.02611	3.95019	24.8402	8.71323	1.26981	7.86019	17.6702	2.50747	3.53981	7.19019	1.96649	2.85019	8.80019	8.44089	7.3517	12.9902	12.9898	13.5402	1.49802	1.25981	1.85981	33.9102	4.89499	7.82019	15.6502	4.54716	3.97981	6.10019	0.933055	0.420185	1.62981	2.56019	0.846775	0.160845	0.530185	0.243145
instlsbs		11.5397	79.1577	32.5877	65.4477	24.2123	9.98233	7.89767	0.24233	3.63767	2.25233	0.0876697	14.6177	1.5771	0.70233	20.5777	8.86094	3.71233	10.7177	15.2477	3.34503	5.29233	7.34767	2.71186	3.26767	10.7577	10.4495	9.37309	11.6877	11.6874	11.0677	2.5461	2.93233	3.59233	33.9977	7.6112	8.91767	14.0277	4.30748	4.92233	7.20767	1.13694	1.97767	0.14767	6.80767	5.41566	4.20273	5.30767	5.05221
instlsino		1.57024	28.4999	33.3299	43.1801	18.4599	6.3599	0.2199	0.6901	1.6701	8.6399	2.8899	22.2001	10.7243	8.3301	25.7401	1.61777	3.6401	4.3801	18.1001	1.59922	0.2699	5.8101	1.63999	2.1001	3.8701	3.5406	2.61145	10.0201	10.0197	14.8901	2.59229	2.1601	0.0501004	31.4101	7.38269	8.8201	15.8701	0.54301	1.0699	4.8101	0.76876	0.0201004	2.5599	2.9201	1.36095	0.56463	1.0499	1.31482
instlsinse		2.05112	108.366	148.984	24.5436	25.5564	6.22641	4.60359	3.14641	1.76359	6.19641	3.40641	19.4036	6.22045	4.14359	23.7236	8.11063	1.16641	6.20359	17.0936	2.05846	3.20641	6.47359	1.5243	2.32359	7.61359	7.23313	6.21984	11.7936	11.7932	13.7136	0.569286	0.446406	1.54641	32.0636	4.45109	7.09359	15.3436	3.80494	3.42641	6.12359	0.527376	0.703594	1.50641	2.34359	0.565344	0.268326	2.10359	1.8005
inteinteins		4.45864	35.4943	83.4057	27.6743	60.9057	8.6543	10.2243	5.6857	2.0843	2.3957	8.7357	18.8343	4.27466	2.0743	24.2543	11.9933	3.5757	8.4343	17.7043	3.71744	4.6357	7.7243	2.19044	3.2143	11.1343	10.7623	9.65998	14.9843	14.9839	13.3543	2.66962	2.3057	2.6357	34.8043	3.8301	7.2143	15.9343	5.59763	4.7257	7.0343	0.515102	1.0543	1.0757	1.6243	0.119462	1.16945	1.9543	1.65851
inteinteinse		5.62562	60.7739	26.8261	35.9639	53.0661	19.3239	12.1939	6.85612	2.05388	0.39612	8.48612	18.3039	3.49099	1.28388	23.8839	13.4774	4.49612	8.72388	17.6239	4.26008	5.05612	7.83388	2.20988	3.31388	12.6839	12.3005	11.2246	15.8039	15.8035	13.1139	3.28082	2.79612	3.12612	35.0939	3.31159	7.00388	15.9439	6.08528	5.01612	7.26388	0.46041	1.22388	1.01612	1.13388	0.63683	1.64876	2.60388	2.3001
intetltebte		18.9884	31.034	8.27604	40.946	52.604	3.11396	13.756	8.54396	3.74604	3.61604	0.756038	13.496	1.90061	4.74396	20.516	17.8137	9.43396	10.686	16.776	5.84266	7.58396	9.62604	4.01858	4.97604	16.176	15.84	14.6902	18.366	18.3657	11.956	4.87477	4.93396	4.64396	36.836	3.80548	6.58604	16.196	6.434	6.21396	10.496	2.8	4.28604	2.14604	3.23604	1.67342	0.372258	11.396	11.121
intetlteinpo		11.1147			3.79262	66.3374	8.99738	12.6026	10.4074	1.87262	1.99262	3.99738	17.1626	2.03033	0.437385	22.5426	16.9542	7.08738	8.76262	17.5926	4.97785	5.78738	8.61262	2.84366	4.03262	13.6926	13.2701	12.2509	17.3826	17.3822	14.1526	2.86963	2.36738	2.77738	35.1026	1.97596	5.96262	16.7026	6.1262	4.87738	9.62262	1.55856	3.41262	0.912615	0.932615	0.910535	1.84538	7.57262	7.23961
intetlteinse		9.25126	56.9516	206.212	29.0016	49.5384	3.02839	11.7816	7.65839	2.35161	1.30161	2.39839	18.1516	3.47033	1.16161	23.2616	14.1095	5.12839	8.68161	18.1416	3.5976	4.46839	8.51161	2.92678	4.02161	13.5116	13.1069	12.0677	17.2416	17.2412	14.4616	1.86183	1.43839	1.98839	34.8716	3.21326	6.82161	17.0216	4.89274	3.86839	9.19161	1.48734	3.17161	0.79161	1.29161	0.52871	1.4671	6.60161	6.28176
pb3n3		20.1996	20.2982	228.072	45.2618	11.3882	16.5618	4.89178	7.91178	5.84178	12.1182	6.86178	25.9818	15.8035	12.5418	29.9018	4.88487	8.95178	4.52178	18.1118	3.52582	0.461777	5.98178	2.45521	2.59178	13.7818	13.5802	12.6474	16.7018	16.7014	7.99178	2.97916	4.20822	7.80822	30.0718	8.10418	8.18178	12.0518	2.43219	4.09822	2.71822	7.50764	7.11822	10.4982	6.36178	5.45371	4.21056	1.14178	0.973157
pb3p3		10.8942	323.475	53.9547	51.1047	58.2747	12.1347	14.4253	0.784702	5.5353	4.8047	9.0553	19.8953	7.11279	5.7353	25.7753	5.70587	2.2553	11.3853	19.5753	0.856398	0.735298	10.7753	5.82768	6.8053	15.8953	15.6315	14.5453	20.9853	20.985	12.0253	2.0127	1.2547	3.3547	35.7853	8.87227	12.6053	16.8653	1.95193	0.614702	8.6553	1.96853	3.4453	0.935298	6.8653	5.6064	4.36727	28.0453	27.8275
pbnpbnpbp		11.1453	122.239	152.001	20.7887	31.7087	4.07129	7.44129	4.72129	6.61129	9.15871	7.26129	24.3613	13.0148	10.0313	28.8713	0.941748	6.12129	5.97129	18.8213	2.44391	0.0687122	7.67129	3.60541	3.96129	13.7213	13.4985	12.4804	18.3613	18.361	9.76129	2.54257	3.36871	6.05871	32.0813	7.75164	8.70129	13.8913	2.43535	3.44871	1.27129	4.24793	3.55871	6.56871	5.78129	4.77085	3.43866	9.63129	9.44512
pbnpbnpbsb		28.0116	35.6483	488.438	27.0783	48.3883	5.40175	3.68175	1.05175	5.60175	11.6683	3.49825	24.1217	11.787	8.88175	27.1217	3.57669	2.27175	3.30175	19.3617	1.29244	0.928253	7.40175	2.90863	3.36175	7.86175	7.58116	6.52367	8.38175	8.38138	8.88175	4.62929	5.26825	4.60825	22.5517	3.7017	2.39825	13.9817	4.11018	4.76825	0.748253	6.89675	6.04825	7.67825	5.62825	6.58818	8.1633	4.25825	4.50028
pbnsipgeas		7.49657	124.241	118.121	48.9612	43.7412	26.2312	8.34123	6.25123	5.99123	14.6388	0.92123	20.0812	8.06525	6.27123	27.9312	0.56447	5.82123	4.64123	17.3012	0.0756395	1.23877	8.30123	3.94845	4.53123	10.3712	10.1503	9.09219	6.67123	6.671	3.71123	8.93589	8.98877	10.7588	34.6012	10.3077	12.0612	11.2112	5.84079	5.96877	1.54877	7.25536	6.35877	8.55877	5.96123	5.10073	3.55691	3.62123	3.43103
pbnsipgen		27.2009	194.875	224.535	35.8552	46.8352	28.7152	11.6052	9.43517	8.35517	18.2648	3.06483	24.3452	13.2565	11.2152	30.8352	6.02943	10.3252	4.75517	19.1552	3.45256	1.59517	6.70517	2.84369	3.20517	9.57517	9.37316	8.37752	3.28517	3.28496	1.18517	10.3215	10.7548	12.6648	30.1752	7.81862	8.84517	10.5652	4.87729	5.65483	8.29483	13.3191	12.7248	14.9048	2.16517	1.43073	0.088917	6.82483	6.99801
pbppbppbn		1.39897	223.162	58.6478	32.8422	47.4522	4.68219	10.3578	1.84781	6.71781	6.96219	7.64781	22.5578	10.2862	7.93781	27.7478	2.48015	4.06781	8.07781	19.4378	1.60029	0.0978137	9.36781	4.80782	5.44781	14.2378	13.9949	12.9214	19.7078	19.7075	11.0678	2.32084	2.46219	4.62219	34.0778	7.97295	10.1978	15.5278	2.32603	2.31219	4.99781	1.18214	0.122186	2.83219	5.78781	4.66134	3.32148	18.2478	18.0458
pbpsingep		1.88621	178.809	56.8195	22.5995	1.80055	36.9795	11.6595	7.51945	6.16945	6.16055	5.73945	17.6495	5.46116	3.77945	25.9495	1.32265	3.94945	5.49945	14.8195	2.54384	3.82055	7.77945	3.44248	4.01945	9.12945	8.9189	7.84658	6.18945	6.18923	5.76945	6.92017	6.93055	8.48055	36.0295	11.541	13.3995	10.5395	6.57329	6.71055	1.81945	3.82691	2.96055	5.03055	12.0795	11.2324	9.66917	8.58945	8.40683
pbsbsibigen		16.9881	287.962	178.268	0.728359	27.2184	6.45836	14.2316	8.21164	7.54164	14.2084	13.0184	23.3216	11.0118	8.79164	29.6216	0.258501	5.77164	7.80164	19.4316	1.45829	0.0983594	9.02164	4.40194	5.07164	14.5916	14.3579	13.2881	11.5316	11.5314	4.12164	9.1785	9.38836	11.0384	31.2816	5.93695	7.46164	12.3416	5.62982	5.78836	3.25836	9.45476	8.40836	10.8284	4.09164	3.14187	1.61298	0.751641	0.552371
si3as3		0.94222	36.8238	144.334	78.2762	10.7962	82.3062	12.7762	18.2462	6.92623	7.99377	10.7838	17.0062	5.09052	3.67623	28.2262	1.49264	6.37623	5.02623	17.7062	0.543989	0.303771	10.4462	5.88984	6.60623	11.1262	10.9049	9.80999	10.2962	10.296	1.71623	10.862	10.7038	11.6138	39.7862	16.2387	18.0162	11.6562	5.40629	5.13377	0.203771	6.11605	5.11377	6.64377	11.0962	10.2003	8.64341	5.54623	5.35355
si3bi3		0.897493	120.184	240.296	19.3764	26.6036	23.8564	15.9364	11.0864	8.21636	9.04364	14.4736	17.5664	5.849	4.39636	26.5964	2.50335	4.49636	12.6264	18.4464	1.18526	0.85636	12.2764	7.6313	8.54636	22.3764	22.131	21.1173	25.7364	25.7361	4.47636	8.46444	7.92364	9.70364	36.4164	11.6573	14.7264	13.3464	4.0479	2.96364	3.70636	2.58429	1.21364	3.41364	16.4464	15.2506	14.116	1.69636	1.49053
si3n3		23.7084	4.03528	60.8553	136.075	90.6253	106.725	20.9153	16.3953	11.8253	10.6547	4.19528	24.0253	12.9601	10.4253	32.5153	10.2746	12.5953	5.60528	18.5053	3.39855	0.205284	7.25528	3.78594	3.86528	4.58528	4.39816	3.43019	3.66472	3.66483	2.73528	8.04064	9.20472	9.20472	36.4753	15.0363	14.3353	10.7253	3.75973	6.00472	6.09472	10.4155	10.2547	11.4947	8.32528	7.78218	6.11442	4.30472	4.46927
si3p3		0.927486	390.895	291.065	55.775	17.405	74.355	14.315	21.975	6.74497	7.97503	10.005	15.635	4.34744	3.01497	27.745	3.62168	7.32497	2.98497	16.395	0.348811	0.695029	8.14497	3.83366	4.40497	0.595029	0.806449	1.91537	2.79497	2.79477	0.294971	11.3943	11.435	12.345	39.795	18.2374	19.345	10.255	5.61206	5.72503	2.21503	7.68348	6.90503	8.15503	10.825	10.0574	8.39559	6.45497	6.26959
si3sb3		4.58537	216.758	502.448	30.552	18.418	58.962	14.952	14.342	9.11196	10.068	14.648	18.182	6.18368	4.76196	28.252	0.291936	5.82196	9.54196	19.272	1.73693	1.23196	12.812	8.04573	8.91196	21.362	21.1341	20.0164	21.742	21.7417	3.11196	9.91167	9.50804	10.828	37.832	13.2476	15.792	13.332	4.25877	3.46804	2.35196	3.9734	2.71804	4.56804	14.322	13.2401	11.8492	4.10196	3.90785
siasgeassip		0.0129786	444.721	165.379	61.4306	21.5906	50.7206	12.6206	14.1306	4.84055	10.7694	9.13945	15.8606	4.03714	2.48055	26.5906	0.158485	4.71055	5.11055	16.3706	0.638935	1.69945	9.12055	4.60715	5.27055	10.0906	9.86996	8.76613	7.98055	7.98032	0.800555	11.6605	11.6594	12.6294	37.7606	14.448	15.9206	10.4306	6.47034	6.41945	1.11945	6.96502	6.02945	7.60945	10.1206	9.21994	7.65595	3.69055	3.49903
siasgeassisb		1.78633	364.954	16.6444	52.8544	5.0544	46.7444	13.4144	12.5944	5.5644	10.5556	11.4856	16.6644	4.58034	3.0344	26.6244	1.27929	4.0844	7.1344	17.2744	0.265001	1.1056	10.3044	5.6292	6.4044	16.9144	16.6881	15.5853	13.4544	13.4541	1.7144	11.208	11.0256	12.0956	36.6644	12.3462	14.3244	11.4144	6.09398	5.6956	0.0943992	6.04944	4.9456	6.7056	11.0344	10.0327	8.55855	3.6144	3.42
siasgeassnas		1.40145	213.025	103.055	53.8546	2.02543	49.4146	13.1746	8.72457	5.75457	9.89543	7.77543	17.5246	5.03436	3.43457	26.7346	2.41919	3.42457	7.15457	17.2746	0.897873	1.70543	10.0446	5.26684	6.08457	16.7246	16.4942	15.3915	13.8546	13.8543	3.17457	10.2253	9.98543	11.1854	36.5646	11.2121	13.4346	11.7746	6.37234	5.87543	0.964567	5.3532	4.17543	6.15543	8.69457	7.65751	6.19418	4.87457	4.67889
siassiassibi		1.50724	65.0148	35.5748	65.8252	0.775248	54.9352	14.1152	15.9452	7.20525	8.46475	11.2848	17.2452	5.38259	3.90525	27.7452	0.235798	5.65525	8.12525	18.2052	0.971248	0.225248	11.3252	6.71778	7.49525	16.2952	16.0687	14.9896	15.3952	15.395	2.65525	10.0615	9.83475	10.9948	38.7852	14.8668	16.9352	12.4352	4.78472	4.30475	1.23525	4.82984	3.71475	5.44475	13.3152	12.323	10.8841	4.40525	4.21008
siassiassin		2.65311	0.392445	61.8776	102.852	32.9424	90.2824	13.1324	17.1524	9.90245	8.95755	5.47755	20.0324	8.37234	6.94245	30.4024	5.30375	9.69245	4.37245	17.0724	0.561765	0.617555	10.0524	5.87089	6.43245	5.25245	5.0361	4.01395	3.80245	3.80229	2.94245	9.03236	9.03755	10.2776	39.9124	17.1768	18.6024	10.6524	5.57341	5.77755	1.22755	6.57621	5.77755	7.46755	10.3324	9.60632	8.00136	3.39245	3.20425
siassiassip		1.19089	143.881	7.95118	71.1688	11.4488	75.3688	13.4088	19.8488	6.90882	7.82118	10.3612	16.5788	4.84061	3.42882	28.1488	2.2293	6.68882	4.34882	17.2988	0.459829	0.481181	9.67882	5.19551	5.85882	6.87882	6.66096	5.55836	7.78882	7.7886	1.28882	11.0239	10.9512	11.8312	39.9688	17.0349	18.5488	11.2288	5.48241	5.36118	0.861181	6.63583	5.71118	7.14118	11.0888	10.2425	8.63678	5.94882	5.75854
siassiassisb		0.11615	85.1346	278.455	63.6454	0.365448	73.2454	13.4654	16.7654	7.32545	8.77455	11.6546	17.3054	5.38476	3.94545	28.1354	0.885388	6.07545	6.71545	18.2554	0.994028	0.235448	11.2854	6.6537	7.41545	14.9354	14.7133	13.6067	13.9154	13.9152	2.19545	10.5095	10.2946	11.3546	39.1254	15.3235	17.2754	12.2654	4.95429	4.53455	0.715448	5.33915	4.25455	5.88455	12.1854	11.2307	9.71914	5.40545	5.21327
siassisbsibi		0.306102	125.57	140.59	47.2803	10.9597	47.3403	14.7603	14.5303	7.88026	9.18974	12.6997	17.6203	5.73242	4.26026	27.7303	0.384836	5.47026	9.54026	18.6603	1.31115	0.690264	12.0303	7.35721	8.18026	19.3703	19.1416	18.0566	19.1803	19.18	3.10026	9.76113	9.43974	10.7597	38.1203	13.8473	16.1903	12.9303	4.45488	3.79974	2.02026	4.17715	2.97974	4.81974	14.3203	13.2659	11.8858	3.96026	3.76461
sibigebisisb		0.680795	283.384	555.814	23.6437		10.0637	15.3737	8.68372	7.05372	10.4663	13.1263	16.9937	4.89664	3.28372	25.8437	4.02079	2.85372	11.4237	17.6737	0.143671	0.666281	11.3437	6.57565	7.48372	22.5137	22.2688	21.2185	24.7837	24.7834	3.68372	9.63913	9.20628	10.7063	35.5037	10.0494	12.9137	12.5337	5.40496	4.48628	2.68372	3.76132	2.39628	4.57628	14.3937	13.2042	11.9848	0.683719	0.478369
sibisibisias		1.43891	95.1587	103.631	45.4813		32.4013	15.2813	13.5313	7.67131	8.87869	12.4587	17.4613	5.66097	4.16131	27.2113	1.09887	5.02131	10.8213	18.4713	1.19997	0.631314	11.9413	7.30314	8.14131	20.2113	19.9775	18.9245	20.5813	20.581	3.57131	9.27011	8.90869	10.3687	37.6613	13.3249	15.8213	13.0113	4.32329	3.57869	2.51131	3.6817	2.44869	4.39869	15.2713	14.1771	12.8803	3.05131	2.85221
sibisibisin		1.84853	14.5025	194.578	77.0975		66.3575	15.2075	15.9375	11.2375	9.00247	5.21247	21.1375	9.36318	7.30753	30.5575	3.61014	8.21753	10.5175	18.2875	1.30801	0.342465	12.3175	7.96403	8.54753	14.4175	14.1931	13.1598	13.5775	13.5774	5.56753	6.89489	7.19247	8.79247	40.2475	16.5208	17.6075	12.4875	4.37546	4.78247	2.24753	3.48052	2.60247	4.69247	15.6775	14.8438	13.2883	2.07753	1.88601
sibisibisip		1.87643	210.202	232.828	38.1183		29.0383	16.6483	15.9883	8.49827	8.52173	11.4517	17.5383	5.91764	4.38827	27.5983	0.140843	5.69827	11.0483	18.5983	1.63785	0.918273	11.7883	7.21226	7.98827	17.2683	17.0399	15.9709	18.2583	18.258	3.54827	9.02724	8.80173	10.2017	38.2583	14.5818	16.6983	13.0583	3.94244	3.41173	2.31827	3.74891	2.61173	4.43173	16.1783	15.1379	13.7744	4.33827	4.14304
sibisibisisb		0.882694	164.478	19.5324	24.1724		29.4124	15.7324	12.2824	8.60237	9.31763	14.3976	17.8424	6.00952	4.55237	27.2424	1.72605	4.97237	11.7324	18.8224	1.43533	1.03237	12.5224	7.83079	8.73237	22.2524	22.0135	20.9628	24.4724	24.4721	4.06237	8.92949	8.43763	10.0476	37.0224	12.2741	15.1524	13.4224	4.07172	3.09763	3.29237	3.019	1.68763	3.77763	15.9024	14.7454	13.5205	2.44237	2.24088
singensip		17.3936	681.476	35.7862	93.6962	45.5662	65.4962	16.6362	13.5962	9.21624	12.1838	3.72376	21.5062	10.358	8.96624	29.9662	6.64129	10.7562	4.15624	16.4662	0.94952	0.42376	6.32624	2.55405	2.95624	3.84624	3.65161	2.68292	1.40376	1.4039	0.53624	10.6608	10.7638	12.1838	33.7462	12.0613	13.4062	8.72624	6.36531	6.88376	7.25376	12.0218	11.4238	13.1738	5.08624	4.44584	2.89628	4.90376	5.0728
singensnn		29.87	420.985	17.9355	87.1045	47.6345	86.2345	11.6045	14.7245	10.0145	14.8355	3.21455	26.9545	16.4135	13.2545	33.8645	11.1467	13.2845	5.45455	18.7645	4.09533	0.444546	7.37455	3.94255	3.92455	11.3945	11.2125	10.2256	2.02455	2.02437	3.37455	7.26554	8.81545	10.3455	34.0645	12.9338	11.7545	10.3345	3.91432	6.44545	7.23545	11.6375	11.5455	13.6955	8.59455	7.97696	6.36488	9.77545	9.93416
singepsnas		3.24429	194.365	52.2048	77.7248	10.2348	60.8848	12.5048	10.8048	8.54483	6.96517	1.20517	19.8448	7.71781	5.96483	28.6548	1.59805	6.58483	5.49483	16.0948	1.19489	2.58517	9.19483	4.85237	5.41483	10.3948	10.1826	9.11202	7.68483	7.68462	4.95483	7.6706	7.76517	9.45517	37.4748	13.1912	14.8148	10.6848	6.36453	6.61517	0.574827	5.0701	4.22517	6.37517	11.7848	10.9559	9.36889	2.73483	2.55046
sinsinsias		7.57573	2.03536	3.13464	116.315	52.2754	95.8354	16.2254	15.8954	10.9154	9.07464	1.06536	21.4654	9.71987	8.66536	31.0954	6.61645	11.5154	5.04536	17.1454	0.803089	0.124641	8.43536	4.50726	5.03536	3.83536	3.63965	2.67079	0.175359	0.175239	3.07536	8.67828	8.43464	9.57464	38.9654	16.1129	18.1754	10.3854	5.48221	5.55464	3.29464	8.2612	7.51464	9.13464	9.61536	8.97773	7.40892	0.0846409	0.254161
sinsinsibi		0.533805	1.72196	133.548	98.948	48.048	88.608	17.318	17.138	12.058	8.19196	3.36804	21.578	10.106	8.85804	31.008	6.42668	11.198	8.48804	17.478	1.33525	0.308036	9.84804	5.90619	6.42804	8.66804	8.47912	7.51034	5.09804	5.09791	4.45804	7.21127	7.08196	8.80196	40.008	17.4761	19.308	11.208	4.57171	4.68196	1.11196	6.16549	5.39196	7.29196	13.068	12.3764	10.869	0.0719638	0.233874
sinsinsip		10.4064	131.83	152.34	112.95	60.9804	99.2604	16.9604	15.4404	10.6104	9.65961	0.430386	21.0204	9.31105	8.19039	30.7904	6.75318	11.3304	4.26039	16.8304	0.631906	0.479614	7.49039	3.5991	4.08039	1.17039	0.975426	0.0080437	2.17961	2.17973	2.34039	9.28818	9.15961	10.0096	38.2904	15.6669	17.4704	9.93039	5.75383	6.03961	4.30961	9.19351	8.51961	9.95961	9.17039	8.5577	6.94623	0.569614	0.739184
sinsinsisb		2.95335	43.2368	75.1932	96.3568	37.5468	100.727	16.1168	17.0268	11.5668	9.07319	1.90681	21.2468	9.70567	8.57681	30.8368	6.41961	11.1968	6.46681	17.1168	0.942967	0.00680709	9.15681	5.19516	5.72681	6.16681	5.97885	4.99538	3.17681	3.17668	3.71681	7.95739	7.76319	9.35319	39.4568	16.9474	18.8668	10.6868	5.09491	5.14319	2.07319	7.11699	6.34319	8.15319	10.8268	10.1634	8.61182	0.816807	0.655107
sinsipsias		3.39202	123.408	84.7618	97.8418	36.3518	87.3418	13.9918	17.6818	9.7118	9.0982	5.2782	19.6218	8.09052	6.8418	30.2018	5.74969	10.0818	3.8818	16.7618	0.513218	0.518202	9.2018	5.08025	5.6318	2.3618	2.14919	1.12746	1.5618	1.56165	2.3718	9.39058	9.3082	10.5682	39.6418	17.3515	18.8818	10.2618	5.67047	5.7982	2.0682	7.30231	6.5282	8.1182	10.3918	9.69437	8.0813	3.3218	3.13648
sinsnpgesb		11.0407	174.09	30.4796	42.7604	14.3604	33.2804	8.11035	9.08035	7.88035	16.0996	4.08965	21.2804	9.15218	7.19035	29.8604	2.33193	7.20035	4.69035	17.7104	0.297353	1.24965	9.03035	4.58223	5.16035	10.3304	10.1155	9.01817	6.49035	6.49012	3.20035	9.57073	9.77965	11.3896	35.9904	11.6082	12.9804	10.9804	6.27451	6.60965	2.17965	8.00464	7.12965	9.29965	8.39035	7.54974	5.92198	0.590353	0.406073
sipgeassnsb		0.592628	159.494	195.904	36.6237	9.82631	30.9237	14.9737	9.91369	6.09369	9.25631	7.63631	17.9237	5.56624	3.89369	27.2437	1.6712	3.96369	8.50369	17.8437	0.157544	1.05631	10.7337	5.9413	6.73369	16.1737	15.9459	14.8165	16.1337	16.1334	3.98369	9.31294	9.15631	10.4263	37.2837	12.22	14.2737	12.4837	5.51945	5.10631	1.98369	4.35142	3.19631	5.15631	10.0237	8.9877	7.49454	6.01369	5.8209
sipgepsias		1.4325	297.015	141.035	64.2945	14.3845	56.1945	13.8545	15.4545	5.68455	10.0655	9.76545	15.4745	3.85456	2.35455	26.3645	0.81134	5.00455	4.61455	15.9145	0.72809	1.82545	8.38455	3.95596	4.57455	6.97455	6.75787	5.65132	5.17455	5.17432	0.20455	11.9583	11.9955	13.0155	37.1045	14.4523	15.7445	9.88455	6.6185	6.66545	1.93545	7.62944	6.76545	8.28545	10.9045	10.0488	8.45296	4.29455	4.10604
sipgepsin		2.00201	391.587	165.277	73.9667	48.4267	71.0267	9.33665	11.9967	6.74665	11.9133	0.79335	17.2267	5.7182	4.30665	27.8467	3.45898	7.60665	2.42665	14.5067	1.67553	2.93335	7.44665	3.36213	3.85665	2.11665	1.90625	0.86928	1.11335	1.11351	1.22665	10.4901	10.5533	12.0233	38.3567	16.0483	17.3767	8.48665	7.36119	7.70335	2.57335	7.75687	7.05335	8.78335	12.0567	11.3525	9.72775	1.03665	0.85264
sipgepsnp		2.769	29.9912	106.221	43.2912	0.618814	46.6012	15.6712	11.7112	6.17119	10.1488	5.67881	17.8812	5.95816	4.43119	27.7512	1.0328	5.77119	7.47119	17.5212	0.383556	0.618814	9.68119	5.1272	5.79119	9.87119	9.65535	8.52102	8.19119	8.19093	2.88119	9.69486	9.64881	10.9588	37.4812	13.9297	15.5612	11.7112	5.31877	5.20881	0.251186	5.65214	4.70881	6.44881	11.1812	10.2691	8.68484	6.10119	5.91608
sipsingen		17.4102	681.465	35.7451	93.6851	45.5451	65.4851	16.6251	13.5851	9.20513	12.2049	3.73487	21.4951	10.3468	8.95513	29.9551	6.63009	10.7451	4.13513	16.4551	0.938377	0.434873	6.30513	2.53295	2.93513	3.82513	3.6305	2.66182	1.42487	1.42501	0.525127	10.672	10.7749	12.2049	33.7351	12.0501	13.3951	8.71513	6.37645	6.89487	7.27487	12.0429	11.4449	13.1949	5.07513	4.43476	2.88518	4.91487	5.08391
sipsipsias		1.0436	262.318	135.972	63.9223	13.5823	72.5323	13.9023	21.0223	6.84233	7.92767	10.1777	16.0823	4.57623	3.19233	27.9223	2.92245	6.97233	3.72233	16.8423	0.40776	0.59767	8.94233	4.54546	5.16233	3.15233	2.93774	1.83083	5.24233	5.24212	0.79233	11.2017	11.1977	12.0877	39.8623	17.6378	18.9223	10.7423	5.53951	5.54767	1.50767	7.12795	6.27767	7.60767	11.0223	10.2152	8.57969	6.26233	6.07458
sipsipsibi		2.16182	299.495	250.335	49.9752	6.04516	47.0152	15.8252	19.7252	7.90516	7.94484	10.0748	16.7252	5.2368	3.72516	27.8952	2.07914	6.50516	7.44516	17.8152	1.24256	0.255161	10.3352	5.86976	6.52516	8.95516	8.73699	7.63559	10.6052	10.6049	2.07516	10.0932	10.0748	11.1648	39.4252	16.8048	18.2352	11.9652	4.54235	4.43484	0.305161	5.48839	4.55484	6.04484	13.8852	12.9911	11.4448	5.82516	5.63617
sipsipsin		4.06159	255.52	239.5	90.8297	42.0897	89.9097	14.6697	17.8897	9.37975	9.30025	5.16025	18.9797	7.57664	6.51975	29.7797	5.96596	10.2697	3.26975	16.2697	0.28574	0.58025	8.24975	4.18741	4.73975	0.62025	0.82951	1.84896	0.75025	0.7504	1.69975	9.85185	9.67025	10.9403	39.2297	17.3761	19.0497	9.73975	5.89703	5.92025	2.93025	8.05137	7.29025	8.79025	10.1897	9.51933	7.90277	3.14975	2.96688
sipsipsisb		0.872559	319.619	62.2308	46.0808	0.540821	63.4708	14.8408	20.2708	7.75082	8.29918	10.5192	16.5408	5.00421	3.56082	28.0608	2.52244	6.77082	5.79082	17.6208	1.04211	0.0608211	10.0408	5.55637	6.20082	7.03082	6.8166	5.6914	9.07082	9.07059	1.50082	10.6449	10.6292	11.6392	39.6508	17.1605	18.5208	11.6008	4.88467	4.80918	0.329179	6.10539	5.19918	6.60918	12.4008	11.5445	9.93166	6.64082	6.45438
sisbgesbsias		2.76918	372.414	488.486	48.0139	3.96386	44.5639	12.9339	10.5339	6.54386	11.7061	12.0161	16.4939	4.32631	2.73386	26.3039	2.34686	3.41386	7.79386	17.3239	0.424036	1.19614	10.8939	6.13141	6.94386	19.5639	19.3349	18.2197	17.6639	17.6636	1.91386	11.2203	10.9861	12.1361	36.3739	11.5891	13.7839	11.6139	6.15576	5.62614	0.953864	5.35024	4.16614	6.01614	11.7639	10.7016	9.2682	2.77386	2.57842
sisbgesbsibi		3.09243	187.41	669.77	14.5397		17.8797	15.1597	9.57973	7.61973	10.7103	13.9603	17.3497	5.13486	3.56973	26.4997	3.1985	3.41973	10.5097	17.9697	0.0303019	0.520268	11.6597	6.85137	7.74973	22.6397	22.4014	21.3184	22.6697	22.6694	3.32973	10.0343	9.62027	10.9603	35.8197	10.3876	13.1197	12.5397	5.48823	4.63027	2.33973	4.11633	2.79027	4.85027	14.2597	13.1082	11.808	2.03973	1.8388
sisbsisbsias		2.09203	145.646	398.896	47.4836	9.49636	64.8036	14.1336	15.3836	7.99364	9.58636	13.0364	17.6436	5.69814	4.25364	28.0836	0.236486	5.83364	8.21364	18.7136	1.33273	0.683636	12.0136	7.3129	8.12364	18.3736	18.1496	17.0351	17.6936	17.6934	2.57364	10.2764	9.98636	11.1764	38.3836	14.2391	16.4436	12.7536	4.63707	4.04636	1.48364	4.70737	3.54636	5.27636	13.2336	12.2161	10.7607	4.84364	4.65117
sisbsisbsibi		2.78086	196.115	232.135	28.1145	22.1355	42.4745	15.3445	13.3245	8.85454	9.70546	14.5255	18.0045	6.08291	4.63454	27.7445	1.02816	5.37454	10.6345	19.0445	1.57296	1.11454	12.6545	7.9238	8.80454	21.8445	21.6115	20.5263	23.0845	23.0842	3.56454	9.4502	9.00546	10.4655	37.4245	12.7448	15.4445	13.3645	4.18861	3.31546	2.78454	3.53678	2.24546	4.20546	15.1245	14.0055	12.6957	3.22454	3.02693
sisbsisbsin		1.63713	5.4108	250.959	71.5608	11.6608	89.0308	13.4408	17.1208	11.0408	10.1192	6.7392	20.7008	8.92633	7.0308	30.6808	4.44418	8.7108	7.2508	17.9308	1.06065	0.519198	11.7308	7.36633	7.9308	11.0008	10.7851	9.71	10.3808	10.3806	4.1908	8.13735	8.4092	9.8292	40.1508	16.8361	17.8408	11.7408	4.96297	5.3992	0.810802	4.85433	4.0292	5.9192	12.5308	11.7525	10.1015	3.8308	3.64528
sisbsisbsip		1.55396	264.406	201.626	37.9136	10.6764	56.7636	15.0536	17.4736	8.56358	9.41642	12.1964	17.4636	5.72424	4.26358	28.2036	1.27263	6.31358	8.15358	18.5836	1.55883	0.773581	11.6336	7.00376	7.74358	14.8736	14.6542	13.5267	15.1536	15.1533	2.41358	10.1416	9.96642	11.1264	38.7436	15.313	17.1636	12.5936	4.4179	4.03642	1.18358	4.86919	3.80642	5.41642	13.7636	12.7978	11.2831	5.97358	5.78444
sn3as3		2.41923	8.52715	41.4828	16.0772	58.6928	54.9772	16.1472	6.63715	8.20715	7.61285	5.74285	21.3372	8.17728	6.57715	29.2272	2.83021	4.55715	9.74715	19.4572	0.120715	0.322845	11.7872	6.69255	7.68715	18.6672	18.418	17.3048	22.0972	22.0968	7.58715	6.80852	6.26285	7.81285	37.8372	10.3879	13.5572	14.4372	4.98749	3.92285	4.25715	2.60805	1.14285	3.55285	6.77715	5.58453	4.21677	9.03715	8.83018
sn3bi3		5.47152	83.1458	180.684	21.0458	80.4658	52.5558	21.0442	2.59419	8.02419	4.65581	6.32581	21.3742	8.12329	6.26419	28.5142	6.14966	2.71419	16.4242	20.0342	0.175893	0.0958072	13.9442	8.69055	9.84419	24.3742	24.0907	23.0593	35.6242	35.6239	10.5542	4.44487	3.74581	5.49581	38.1942	9.35497	13.1642	16.1742	3.98663	2.46581	8.20419	0.885393	2.65419	0.165807	13.8942	12.526	11.4007	11.6442	11.4148
sn3n3		39.7852	156.878	68.0722	86.9778	2.29781	116.218	10.1778	19.4678	12.0478	15.8722	2.71219	33.2278	22.7509	19.1978	38.7978	14.4247	17.1978	7.88781	22.7378	7.87941	4.15781	9.88781	6.32072	6.31781	16.6178	16.4373	15.4136	14.1678	14.1675	6.96781	4.03389	5.68219	8.26219	34.9978	13.1214	12.1678	13.4778	1.15795	3.56219	6.01219	10.7387	10.5622	13.4222	9.50781	8.75635	7.22135	12.0522	12.2058
sn3p3		5.55609	55.5986	171.591	31.3114	58.3486	65.4214	17.6314	9.26143	9.11143	8.64857	2.49857	22.9814	10.1939	8.58143	31.2914	1.12193	7.54143	11.0314	20.8214	2.25223	1.53143	12.5414	7.61917	8.45143	14.5714	14.3396	13.1727	17.4914	17.4911	8.17143	5.60879	5.27857	6.85857	39.2514	13.067	15.6914	15.3414	3.22424	2.58857	4.41143	2.11401	0.878566	3.05857	9.81143	8.73624	7.22028	9.89143	9.69764
sn3sb3		1.15655	101.005	128.505	34.7651	78.3751	16.9251	18.4949	5.00494	8.05494	7.14506	7.25506	21.6249	8.21781	6.43494	29.4249	4.4744	3.56494	13.0749	20.5149	0.556905	0.174935	13.7149	8.36813	9.46494	23.4349	23.1745	22.0343	31.6349	31.6346	8.98494	5.98261	5.38506	6.88506	38.4249	9.95051	13.3349	15.8849	4.30791	3.01506	6.54494	0.772685	0.874935	1.65506	10.5249	9.24874	7.9033	12.0149	11.802
snaspbassnp		1.93642	204.072	135.248	0.128219	58.7418	31.6482	15.3382	3.72822	6.49822	7.12178	0.121781	20.0782	7.01723	5.50822	27.3082	4.61248	2.98822	9.78822	18.7382	0.436951	0.751781	10.7482	5.69434	6.68822	16.7982	16.5449	15.4396	21.0282	21.0279	8.41822	5.88663	5.25178	6.98178	36.5482	9.23306	12.6082	14.5382	4.72821	3.56178	5.10822	1.70844	0.231781	2.67178	5.81822	4.60396	3.27701	15.3382	15.1283
snaspbsbsibi		4.35498	192.518	610.008	20.1278		4.53783	14.7922	3.69217	5.48217	7.49783	5.53783	19.3322	6.30741	4.76217	26.9822	5.57988	2.32217	11.1222	19.0422	0.273518	0.497828	11.7422	6.63511	7.70217	19.8922	19.6318	18.5613	22.2722	22.2719	7.92217	6.51495	5.82783	7.32783	36.6122	9.09272	12.5522	14.8022	4.68677	3.33783	5.44217	1.53161	0.0721721	2.32783	9.87217	8.64094	7.37186	15.4522	15.2379
snassnassnbi		0.516836	20.2304	29.2896	0.0103917	70.9604	8.25961	17.4396	5.16961	7.66961	6.80039	5.85039	21.2196	8.04911	6.31961	28.8796	3.94416	3.74961	11.7396	19.5696	0.0730083	0.380392	12.3796	7.22609	8.25961	20.8296	20.5704	19.4783	26.5496	26.5493	8.48961	6.08434	5.54039	7.16039	37.9296	10.1191	13.3496	14.9496	4.71093	3.57039	5.49961	1.52064	0.0296083	2.52039	9.01961	7.76853	6.47114	9.84961	9.63592
snassnassnn		17.0415	97.032	46.198	36.222	38.848	72.442	12.952	10.212	11.582	10.138	7.26795	26.502	13.5913	11.242	33.582	2.64393	8.84205	7.64205	21.022	2.28964	0.662047	11.542	6.78882	7.46205	15.592	15.365	14.2401	19.032	19.0317	7.99205	5.91829	6.10795	7.71795	37.502	10.5303	12.502	14.402	4.28052	4.41795	1.00205	5.37348	4.30795	6.84795	6.29205	5.27712	3.72775	0.962047	0.770917
snassnassnp		3.21708	5.79592	21.2541	19.2541	59.4759	57.3841	16.6641	7.67408	8.61408	7.86592	4.62592	21.8841	8.8663	7.28408	29.9341	1.43939	5.61408	10.1841	19.9241	0.865744	0.354084	12.0641	7.02912	7.97408	17.1341	16.891	15.7607	20.5341	20.5338	7.83408	6.33814	5.85592	7.44592	38.3641	11.3916	14.3941	14.7741	4.34392	3.40592	4.38408	2.36357	0.975916	3.31592	7.77408	6.62198	5.2058	9.36408	9.16164
snassnassnsb		1.62059	18.1256	79.2356	0.485551	66.3256	29.3244	16.6544	5.94445	7.76445	7.51555	6.18555	21.2944	8.086	6.40445	29.1544	3.40598	4.08445	10.6444	19.6744	0.176299	0.285551	12.3044	7.12901	8.14445	20.0744	19.8223	18.6981	25.0744	25.0741	7.99445	6.55498	6.02555	7.58555	37.9844	10.2967	13.4544	14.8144	4.8238	3.72555	4.97445	2.03424	0.515551	2.97555	7.83445	6.61595	5.25073	10.0444	9.83587
snassnsbsnbi		0.949906	51.8775	18.1275	16.3575	78.2775	13.8975	18.3225	4.62255	7.69255	6.58745	6.39745	21.3525	8.09254	6.31255	28.9725	4.49585	3.46255	12.9325	19.9325	0.222629	0.197451	13.0525	7.81513	8.89255	22.2925	22.0296	20.9295	29.7425	29.7422	8.97255	5.80013	5.22745	6.82745	38.1525	9.96991	13.3125	15.4425	4.47931	3.24745	6.27255	0.899331	0.712549	1.86745	10.2925	9.0133	7.72547	10.8525	10.6369
snbisnbisnas		3.07184	50.1669	99.4331	9.15693	78.8669	27.5469	18.9831	3.66307	7.49307	5.91693	6.12693	21.0931	7.87439	6.06307	28.5131	5.22492	2.98307	13.9031	19.6231	0.0730464	0.466926	12.9831	7.77074	8.86307	22.5731	22.303	21.237	30.9431	30.9427	9.35307	5.44127	4.84693	6.51693	37.9431	9.62833	13.0931	15.3931	4.53829	3.23693	6.69307	0.486576	1.17307	1.50693	11.3031	9.99213	8.77508	10.5531	10.3323
snbisnbisnn		10.0241	53.4265	90.5565	17.2665	49.8435	8.96647	15.2065	8.05647	11.8665	8.49353	8.21353	26.8565	13.8303	11.4365	33.5765	1.00963	8.06647	10.9865	21.6265	2.43733	1.07647	13.0265	8.11135	8.91647	19.3965	19.1547	18.0666	27.3865	27.3862	10.1065	4.25254	4.27353	6.44353	38.4165	10.6506	13.0765	15.6965	3.59776	3.32353	3.63647	3.09323	1.81353	4.78353	10.5465	9.44672	8.00096	1.74647	1.54402
snbisnbisnp		2.73729	74.2627	150.917	7.34271	76.4627	21.5527	19.7373	5.24729	8.28729	5.97271	4.96271	21.8573	8.81986	6.98729	29.4273	3.4927	4.22729	14.5273	20.3473	0.970433	0.467293	13.4673	8.31722	9.34729	21.3273	21.0649	19.9784	29.5873	29.587	9.82729	4.703	4.21271	5.94271	38.7473	11.0465	14.2173	15.9773	3.61157	2.48271	7.02729	0.0278467	1.53729	1.06271	12.4473	11.1803	9.90721	11.2073	10.992
snbisnbisnsb		3.18835	88.0669	40.9631	27.8769	87.0969	48.0269	20.1631	3.46311	8.05311	5.46689	6.71689	21.4631	8.16659	6.33311	28.8131	5.57894	2.99311	15.3231	20.2331	0.347484	0.0331138	13.9031	8.61959	9.75311	24.1631	23.8869	22.8196	34.3331	34.3328	10.0631	4.91883	4.25689	5.90689	38.2431	9.54219	13.1931	16.1231	4.04288	2.60689	7.70311	0.386164	2.11311	0.606886	12.7631	11.4237	10.2271	11.7731	11.5489
snnpbnsnp		28.1953	144.819	240.941	26.9615	13.4085	57.5015	10.7515	11.9315	10.2715	13.4985	3.49851	28.4515	16.97	13.9015	34.1015	6.74303	11.1415	7.12149	21.2115	4.74014	1.94149	9.39149	5.30257	5.59149	14.7515	14.5441	13.4708	15.5315	15.5312	7.05149	5.21604	6.22851	8.40851	33.7615	9.64497	10.0415	13.6215	2.72817	4.10851	2.98851	8.45768	7.89851	10.5885	6.53149	5.63342	4.11438	3.90851	4.08336
snnsnnsnas		28.1067	140.101	53.8293	49.8907	22.4293	91.7507	11.3307	13.9407	11.7707	12.3693	4.85925	29.6507	17.7104	14.5107	35.9507	7.73035	12.0507	7.34075	21.5807	4.44829	1.45075	10.5607	6.34196	6.64075	15.0707	14.8646	13.7654	16.6107	16.6105	7.81075	4.89163	5.99925	7.75925	36.4107	11.4431	11.6607	13.8707	3.11017	4.63925	2.16925	7.80034	7.22925	9.83925	7.45075	6.57489	4.9666	5.14925	5.3239
snnsnnsnbi		21.9051	113.608	26.3479	12.0079	34.4821	51.9279	12.0879	12.1379	12.0479	11.1721	3.98214	29.4879	17.362	14.3179	35.5979	6.34516	11.3379	8.58786	21.6079	4.06144	1.42786	11.1379	6.79507	7.19786	16.9479	16.7331	15.6502	20.5679	20.5676	9.17786	3.87076	4.74214	6.90214	37.1179	11.5457	12.2879	14.5079	2.95805	4.08214	0.41214	6.27184	5.54214	8.39214	9.22786	8.31251	6.74866	3.77214	3.95298
snnsnnsnp		29.8258	112.679	25.2891	56.9291	20.2309	97.4091	11.7691	15.0291	11.8891	12.9809	3.84091	30.0391	18.3523	15.0991	36.4391	9.10616	12.9891	7.82909	21.9491	5.25009	2.09909	10.6591	6.53497	6.76909	14.3291	14.1291	13.0191	15.1691	15.1688	7.72909	4.64084	5.87091	7.63091	36.4791	12.1789	12.1091	14.0391	2.48452	4.21091	2.40091	7.87355	7.40091	9.92091	8.55909	7.71453	6.0799	5.25091	5.42061
snnsnnsnsb		24.7699	178.849	31.6011	26.9889	32.7411	73.5289	11.3289	12.6989	11.8589	11.9811	4.80111	29.4989	17.3815	14.3289	35.7789	6.83312	11.6189	7.63889	21.6289	4.15463	1.44889	10.9789	6.63711	7.00889	15.7289	15.5199	14.4099	18.9989	18.9986	8.53889	4.44105	5.36111	7.37111	36.8889	11.4684	12.0889	14.2589	3.11088	4.33111	1.11111	6.93558	6.25111	9.00111	7.89889	7.00959	5.39186	3.61111	3.78759
snnsnpsnas		18.6267	74.4631	22.4031	40.3131	39.1069	76.2831	13.4931	10.9531	11.5231	10.6069	6.18695	26.8831	14.128	11.6431	34.0931	3.83233	9.51305	8.14305	21.3831	2.94846	1.05305	11.6631	6.97838	7.57305	14.5531	14.3315	13.1852	17.5731	17.5728	8.04305	5.63187	6.00695	7.48695	37.7731	11.2689	12.8331	14.6131	3.74185	4.16695	0.923054	5.32735	4.37695	6.78695	7.39305	6.41163	4.8103	1.18305	0.996314
snppbpsnas		11.3971	5.33891	0.208906	61.7011	40.5389	31.0411	9.78109	1.70109	3.85109	11.1389	4.01891	20.0811	6.32414	4.86109	27.0811	5.83825	1.47109	8.80109	19.3311	0.858436	1.20891	10.1311	4.78863	5.78109	5.50109	5.20777	4.03744	3.51109	3.51072	7.76109	7.19764	6.59891	5.53891	30.5711	2.41483	5.56109	14.6811	5.57293	4.46891	3.35109	3.79793	2.32891	3.44891	3.59891	4.82183	6.33034	3.38109	3.13585
snppbpsnn		11.3281	74.466	287.816	0.033992	54.034	54.956	12.536	7.93601	9.89601	8.75399	1.85601	25.146	12.4769	9.97601	31.856	1.6616	7.47601	8.35601	20.476	2.1863	0.296008	10.976	6.34144	6.91601	13.966	13.7432	12.6024	17.246	17.2457	9.62601	3.96956	4.34399	5.88399	37.196	10.7449	12.386	14.986	3.22071	3.64399	3.22601	2.9682	2.03399	4.45399	8.36601	7.35669	5.80028	9.22601	9.03885
snpsnpsnas		4.39293	27.8453	90.4747	24.4247	59.3653	61.1447	17.0747	8.46469	8.82469	8.31531	3.65531	22.3747	9.48522	7.90469	30.5447	0.190102	6.54469	10.5547	20.3347	1.53842	0.934688	12.2547	7.2789	8.16469	15.7747	15.5371	14.3895	18.9347	18.9344	7.95469	6.0076	5.59531	7.18531	38.7247	12.181	15.0047	15.0147	3.81033	3.01531	4.35469	2.27737	0.965312	3.22531	8.73469	7.62105	6.15725	9.59469	9.39647
snpsnpsnbi		0.774464	66.8064	142.724	5.67358	70.2664	14.7736	18.4536	7.58358	8.66358	7.28642	3.61642	22.3936	9.55138	7.83358	30.3536	0.967237	5.93358	12.6436	20.6236	1.73469	1.10358	13.0236	7.99735	8.92358	17.9936	17.7473	16.6197	23.5336	23.5333	9.08358	4.99695	4.61642	6.33642	39.0736	12.3501	15.1436	15.7336	3.26571	2.41642	5.83358	0.938157	0.443583	1.94642	10.9436	9.77734	8.37818	10.7136	10.5093
snpsnpsnn		19.8982	48.2531	100.453	45.4531	38.3969	81.2431	14.0931	11.7531	11.5631	10.8369	4.78691	27.2831	14.6892	12.0431	34.6131	5.03645	10.1931	8.75309	21.7131	3.58854	1.40309	11.8731	7.25985	7.77309	13.6031	13.3871	12.2193	16.2231	16.2228	8.22309	5.21026	5.78691	7.13691	38.1631	12.1268	13.2631	14.8531	3.16156	3.90691	1.00309	5.11876	4.28691	6.56691	8.55309	7.60446	5.95178	1.55309	1.37083
snpsnpsnsb		3.05484	63.1973	90.2227	7.37275	68.6873	37.1227	17.6627	8.20275	8.67275	8.07725	3.94725	22.4627	9.58724	7.92275	30.6127	0.444594	6.30275	11.5627	20.7027	1.82734	1.20275	12.9027	7.85857	8.77275	17.2427	17.0028	15.8449	22.0027	22.0024	8.53275	5.51741	5.12725	6.80725	39.0527	12.443	15.1927	15.5527	3.40776	2.58725	5.23275	1.5226	0.167254	2.48725	9.78275	8.64714	7.18516	10.8727	10.6732
snsbpbsbsnbi		6.41183	204.162	911.572	64.3324	75.3024	37.0024	18.4776	1.22762	6.85762	4.68238	3.30238	20.8176	7.31714	5.61762	27.7576	7.11561	1.77762	13.7176	19.9576	0.241157	0.352377	13.3076	7.93994	9.12762	22.3576	22.0781	20.9993	31.8576	31.8573	10.7576	4.45279	3.64238	5.26238	37.5776	8.49795	12.4276	16.3776	4.10852	2.46238	8.31762	0.885983	2.68762	0.0123773	10.0776	8.7193	7.51807	18.9876	18.7608
snsbsnsbsnas		1.28341	54.4101	108.29	17.2701	72.8001	5.34991	17.3899	5.34991	7.67991	7.42009	6.77009	21.3399	8.04399	6.29991	29.1799	4.00889	3.70991	11.7299	19.9899	0.277107	0.160093	12.9199	7.65877	8.71991	21.6399	21.384	20.2505	28.2299	28.2296	8.40991	6.33582	5.79009	7.32009	38.1299	10.0879	13.3199	15.2599	4.64182	3.46009	5.69991	1.462	0.119907	2.38009	9.02991	7.78286	6.42516	10.9799	10.7694
snsbsnsbsnbi		1.04652	93.5931	54.5231	33.7831	84.5831	35.4931	19.3369	4.23686	8.05686	6.29314	6.97314	21.5469	8.18812	6.37686	29.1269	5.03593	3.26686	14.2069	20.3869	0.452922	0.0968621	13.8269	8.50962	9.62686	23.8269	23.5589	22.4545	33.0069	33.0065	9.53686	5.4456	4.82314	6.38314	38.3569	9.75574	13.2669	16.0169	4.17476	2.81314	7.14686	0.173638	1.51686	1.11314	11.6569	10.3491	9.07699	11.8769	11.6585
snsbsnsbsnn		14.4267	122.632	41.3582	4.76182	52.1782	32.6518	13.5118	9.28182	11.6818	10.0582	9.07818	26.8318	13.7779	11.4918	33.9118	1.94235	8.63182	8.77182	21.6818	2.56044	1.19182	12.7218	7.7863	8.55182	17.7518	17.5215	16.377	24.4318	24.4315	9.00182	5.2574	5.28818	7.27818	38.2218	10.7506	13.0518	15.3118	3.86429	3.66818	2.50182	4.17944	2.96818	5.72818	7.88182	6.83775	5.27864	2.46182	2.26839
snsbsnsbsnp		1.73802	77.1618	7.53175	14.2118	74.5918	9.82825	17.9482	6.75825	8.29825	7.56175	5.63175	21.9782	8.88312	7.13825	29.9582	2.37387	4.88825	12.2382	20.5882	1.23157	0.688249	13.2982	8.10749	9.10825	20.1882	19.939	18.7874	26.6882	26.6879	8.78825	5.67152	5.21175	6.80175	38.7382	11.3357	14.3082	15.7282	3.79284	2.78175	5.96825	1.058	0.428249	1.99175	10.0082	8.8035	7.39557	11.5282	11.3225
tl3o3		0.828051	616.361	48.3589	144.171	54.7911	20.4289	1.28891	4.59109	1.30109	7.37891	7.48109	26.9611	18.8744	16.1011	28.7911	8.97113	11.9211	4.21109	21.1911	9.64437	6.98109	6.46109	3.63981	3.65109	5.16109	4.85398	4.20324	12.4911	12.4907	17.7911	9.08053	7.92109	3.08109	30.4111	13.0157	12.8311	18.3211	6.85217	5.30109	4.34109	0.511578	0.721088	2.91891	7.06109	5.737	5.26945	0.391088	0.146348
tl3po3		19.6914			19.6723	38.6323	29.1623	10.8877	15.2623	0.947749	4.66775	6.56775	15.1377	0.283439	2.44225	19.4777	20.9331	10.2523	7.63775	16.7377	5.61842	6.45225	8.57775	2.93401	4.16775	13.1277	12.6326	11.7869	17.4077	17.4073	15.7077	1.31695	0.822251	1.93225	33.3277	0.0683305	4.16775	17.2177	5.50725	4.11225	12.2977	4.23064	6.20775	3.12775	0.557749	1.41706	2.07037	14.5577	14.1675
tl3s3		6.18728	248.108	136.762	35.048	18.472	47.312	1.29196	5.44196	0.818037	7.38196	5.24804	18.008	5.42545	3.09804	21.458	9.19473	2.81196	3.62804	16.538	1.73111	3.22196	6.16804	1.4228	2.09804	6.38804	5.96814	5.0122	13.188	13.1876	14.958	1.26935	1.11804	0.521963	30.088	3.58395	5.72804	15.768	2.51982	2.49196	8.19804	1.80333	2.88804	0.448037	1.34804	0.506023	1.21528	7.26804	6.93494
tl3se3		10.0215	38.0282	55.6882	37.6818	7.29821	28.6182	5.19179	8.47821	0.591794	0.558206	5.71179	16.1018	2.75879	0.431794	19.8318	13.8867	6.10821	4.22179	15.9718	3.67849	4.80821	5.97179	0.923354	1.82179	10.1218	9.67335	8.77489	14.2218	14.2213	14.0718	0.700576	0.548206	2.09821	30.2218	1.52693	4.45179	15.5218	4.25559	3.65821	8.47179	1.53538	2.94179	0.251794	0.0517945	1.88557	2.5102	8.87179	8.51763
tl3te3		15.4428	246.347	298.687	11.9328	55.5772	57.4572	9.53278	13.2672	0.302783	2.93278	3.64278	15.2028	0.419443	2.14722	19.6028	19.1702	9.65722	6.22278	16.9428	5.13117	6.06722	7.73278	2.04791	3.19278	12.2728	11.8179	10.8353	16.8228	16.8223	14.7628	1.92729	1.54722	2.44722	32.4628	0.066673	3.78278	16.9928	5.36836	4.25722	10.9228	2.96759	4.76278	2.05278	1.95722	3.86189	4.7172	14.1128	13.7546
tlntlntlas		14.4407	392.49	45.2997	14.2197	1.90969	47.1897	2.80031	11.2597	2.22969	7.89969	11.7903	17.1903	5.50204	2.98031	19.6403	8.25573	3.00969	4.15031	14.4003	2.36621	4.32969	6.80031	2.41286	2.85031	5.90031	5.37338	4.4875	13.8803	13.8792	17.3703	4.78225	4.27031	2.25031	29.6303	5.31001	6.63031	15.1003	1.61847	2.18969	11.1003	5.25776	6.03031	3.44031	3.27031	1.47961	0.720722	14.5803	14.1364
tlntlntlp		11.4227	348.314	30.6258	16.3558	0.955812	43.8658	2.60419	10.3558	2.88581	11.0458	9.54419	17.1642	5.56754	3.05419	19.6242	7.69616	2.73581	3.85419	14.2242	2.32315	4.35581	6.18419	1.83146	2.21419	6.89419	6.3672	5.45936	13.5142	13.5131	16.2142	3.80082	3.22419	1.16419	28.9942	5.02647	6.21419	14.4642	2.00486	2.70581	9.67419	3.91851	4.61419	2.11419	4.47419	2.67477	1.89887	12.1142	11.6703
tlotlstlse		2.94825	236.461	2.39949	71.3705	4.54051	34.5995	0.26051	1.62949	2.06051	5.11949	3.49051	21.3605	10.0418	7.33051	24.3705	3.60372	1.79051	3.36051	18.7805	2.35408	0.27051	6.53051	2.36927	2.83051	6.69051	6.30922	5.45597	12.8805	12.8801	15.8805	3.53602	2.95051	0.21051	30.4105	6.221	7.51051	17.1205	0.68947	0.0705104	6.80051	1.13968	1.96051	1.05949	2.22051	0.50976	0.10295	4.33051	4.02604
tlpobpoalpo		24.0908			1.8372	25.9828	11.3372	15.6872	9.0628	4.0172	4.3172	6.6472	12.2072	3.01967	6.2128	20.1572	18.7749	10.0328	12.6472	14.6872	7.76262	9.7828	9.7572	4.28408	5.2172	17.5472	17.2028	16.1326	20.1072	20.1069	11.3972	5.41043	5.6228	4.6228	38.0272	4.68146	7.4272	14.4372	8.06477	7.9828	10.7872	3.16664	4.6572	2.7472	9.5172	7.95149	6.75334	12.6172	12.3342
tlptlptlbi		0.462413	59.1078	280.912	39.9222	74.4522	88.0122	6.13784	14.6522	4.08216	11.9722	1.10784	13.8978	0.523287	1.30216	16.5978	16.1002	9.14216	7.02784	14.5678	5.1441	5.74216	8.42784	2.88124	3.83784	8.64784	8.02319	6.99444	10.7878	10.7866	11.7678	3.05469	2.69216	0.0521632	20.3778	7.03142	4.33216	13.8478	6.10568	5.15216	8.69784	1.2527	2.71784	2.38784	3.91216	5.99257	6.84667	9.11784	8.59237
tlsbsals		10.3441	50.6893	85.7993	64.8493	1.29067	4.35067	9.65933	1.59067	1.14933	3.58067	1.83933	10.7293	2.40986	4.51067	17.8493	10.9843	6.12067	10.0893	11.2893	7.31371	9.21067	4.85933	0.250908	0.789328	7.21933	6.93105	5.83747	6.84933	6.84907	6.95933	6.56984	6.91067	6.49067	32.3493	6.18506	7.42933	9.96933	8.29097	8.95067	4.08933	1.87096	1.07067	2.27067	6.57933	5.32395	3.973	4.49933	4.25614
tlsebsealse		13.6044	34.9184	150.122	54.2516	10.2416	25.5916	12.8116	4.32839	1.87161	0.801611	1.83161	10.8716	2.9996	5.56839	18.3216	13.7587	7.99839	10.8916	12.5116	7.44471	9.56839	6.40161	1.49977	2.14161	11.1416	10.8353	9.74409	11.0816	11.0813	7.81161	6.81028	7.23839	6.51839	33.9616	5.42583	6.86161	11.4016	8.32841	8.92839	5.87161	0.628549	0.341611	1.07839	5.58161	4.19841	2.90324	7.03161	6.77569
tlsetlsetls		8.67	49.9131	39.8069	36.1131	11.4769	35.1469	2.97305	7.43695	0.603053	2.84695	5.42305	16.7031	3.61852	1.28305	20.3231	12.3414	5.06695	3.95305	16.1331	3.04948	4.30695	5.99305	1.04553	1.87305	8.85305	8.41411	7.49507	13.8631	13.8626	14.3231	0.0799673	0.0369473	1.59695	30.0931	2.15358	4.79305	15.5731	3.70002	3.30695	8.33305	1.57913	2.87305	0.283053	0.463053	1.44809	2.10165	8.24305	7.89577
tlstlstlse		7.44294	144.699	40.6512	35.3188	15.2612	41.3512	1.01881	6.37119	0.798814	5.09119	5.30881	17.4488	4.60175	2.26881	20.9888	10.6922	3.87119	3.88881	16.3988	2.34564	3.72119	6.16881	1.31827	2.06881	7.65881	7.23018	6.29052	13.5588	13.5584	14.6888	0.630434	0.578814	1.03119	30.1988	2.95438	5.33881	15.7188	3.07944	2.87119	8.30881	1.72982	2.91881	0.398814	0.968814	0.913996	1.59822	7.81881	7.47917
tlstlstlte		9.27118	77.5096	173.21	27.1196	31.6004	49.0404	2.17957	8.03043	0.689567	3.68043	4.26957	17.1296	3.80752	1.38957	20.8796	12.3877	5.10043	4.34957	16.6796	2.86305	4.20043	6.70957	1.63832	2.45957	8.11957	7.69264	6.71443	14.2996	14.2991	14.9796	0.297127	0.299567	1.09043	30.8796	2.47861	5.06957	16.1996	3.45076	3.10043	9.14957	2.22922	3.52957	1.01957	0.169567	1.70396	2.47535	9.34957	9.01098
tltebtealte		19.0185	31.0403	44.9097	30.0697	32.2203	8.9003	14.3997	8.2903	2.4497	1.7397	1.9797	10.9097	4.49711	7.2503	19.1197	18.5299	10.5203	11.3297	13.9997	8.51732	10.3003	8.2197	2.65723	3.5697	14.4697	14.153	12.9777	16.1197	16.1194	9.0797	7.60096	7.6803	6.4903	36.4997	3.77711	6.4097	13.2697	9.18473	9.0803	8.3397	0.773553	2.1797	0.619703	5.1797	3.72414	2.30593	11.3697	11.1075
tltetltetls		12.2834	87.5928	225.633	19.3672	43.9828	52.6128	5.65717	10.7128	0.407165	0.342835	3.63717	16.0972	2.04932	0.452835	20.1572	15.8008	7.47283	5.09717	16.7472	4.05183	5.20283	7.13717	1.75341	2.72717	10.0272	9.58887	8.60159	15.4272	15.4267	14.8272	0.848125	0.672835	1.80283	31.5372	1.18577	4.29717	16.5372	4.45972	3.74283	9.97717	2.53765	4.07717	1.47717	1.06283	2.9588	3.77278	11.4772	11.1305
	SD	10.9851	159.537	163.506	35.6189	39.4502	33.5479	5.17675	9.30169	5.09783	5.58024	6.31503	6.07918	6.99565	7.43678	5.67541	8.4547	8.23028	3.53283	4.22327	5.31262	6.08214	3.62079	3.57727	3.74859	5.93597	5.94711	5.9327	7.82881	7.82877	4.52997	4.39681	4.6026	3.83635	3.94139	5.10892	5.7202	3.46849	3.96303	4.62037	4.42131	3.85451	4.10935	4.10338	4.1258	4.34016	4.27807	6.10076	6.07321
	MD	0.508346	-2.83659	-15.0114	37.9338	-9.68853	15.2222	11.6064	-0.425567	2.47516	-8.34802	-4.94192	15.1461	2.12448	-0.446826	22.5938	-7.8894	-2.62431	8.0292	14.2575	-4.53716	-6.60093	7.21808	2.39849	2.99566	11.4903	11.1802	10.0685	12.1104	12.1099	5.88112	-8.0127	-8.51388	-8.31527	33.231	6.47862	7.6799	10.8924	-7.8019	-8.39199	2.38582	-4.00736	-3.08212	-4.6258	6.52043	5.21337	3.85021	3.17629	2.91675
	MAD	7.529	115.199	110.011	42.2778	32.5009	27.9261	11.7837	7.91743	4.77779	8.85322	6.2856	15.1461	6.24145	6.45847	22.5938	9.70544	7.46189	8.09507	14.2575	5.53742	6.98308	7.28224	3.70129	4.12344	11.5248	11.226	10.1723	12.381	12.3806	6.00559	8.34154	8.78627	8.38274	33.231	6.76482	8.25971	10.8924	7.91819	8.46675	4.08018	4.57555	4.12394	5.00406	6.6389	5.63578	4.69721	5.46328	5.32541
	RMSD	10.9787	159.271	163.896	51.995	40.5552	36.7891	12.705	9.29602	5.65935	10.0362	8.01063	16.3168	7.30003	7.43789	23.2935	11.5537	8.62555	8.7697	14.8679	6.97971	8.96896	8.07263	4.30201	4.79368	12.9285	12.6589	11.6814	14.4135	14.4131	7.41891	9.13626	9.6747	9.15492	33.4631	8.24543	9.57043	11.4296	8.74776	9.57615	5.01751	5.55581	5.13131	6.17899	7.71245	6.77892	5.75025	6.86912	6.72824
	AMAX	41.2061	681.476	911.572	164.348	102.066	116.218	21.0442	21.975	12.058	24.2678	23.1475	33.2278	22.7509	19.1978	38.7978	22.2394	17.9257	16.4242	22.7378	13.0446	17.9329	13.9442	8.69055	9.84419	24.3742	24.0907	23.0593	35.6242	35.6239	17.7911	16.2944	16.6272	15.9144	40.3819	18.2374	19.345	18.3211	14.751	17.4136	13.6919	16.1663	16.2144	18.5944	16.4464	15.2506	14.116	28.0453	27.8275
[truncated: 24 more columns]

## Sheet: wda_dE_DFT_SQM_def2-QZVPP
Dimerization energies in kcal mol-1 for the wda IHD302 set. All computations were done with the def2-QZVPP basis set. Statistics can be found at the bottom of the table.
SYSTEM	REF	HF-D4	PM6-D3H4X	PM7	GFN0-xTB	GFN1-xTB	GFN2-xTB	B97M-V-C	B97-3c	r2SCAN-3c	PBEh-3c	wB97X-3c	PBE	PBE-D3BJ	PBE-D4	BP86	BP86-D3BJ	BP86-D4	B97M-V	TPSS	TPSS-D3BJ	TPSS-D4	r2SCAN	r2SCAN-D3BJ	r2SCAN-D4	M06-L	M06-L-D3(0)	M06-L-D4	MN15-L	MN15-L-D3(0)	PBE0	PBE0-D3BJ	PBE0-D4	PBE0-NL	B3LYP	B3LYP-D3BJ	B3LYP-D4	TPSSh	TPSSh-D3BJ	TPSSh-D4	r2SCAN0	r2SCAN0-D3BJ	r2SCAN0-D4	r2SCAN0-NL	M06	M06-D3(0)	M06-D4	M06-2X	M06-2X-D3(0)
al3as3	-19.4224	-22.0341	41.05	-12.39	-33.5	-25.78	-31.06	-10.5	-27.4	-18.38	-22.84	-17.63	-10.4	-21.2985	-22.28	-6.8	-31.708	-27.31	-13.48	-10.11	-26.1101	-26.21	-13.98	-18.8194	-18	-14.46	-14.8914	-15.9988	-17.13	-17.1312	-12.21	-24.1263	-23.72	-20.93	-1.78	-22.5788	-20.9	-10.76	-26.9589	-26.05	-14.83	-21.0714	-19.92	-19.25	-17	-18.8926	-19.6457	-18.91	-19.3646
al3bi3	-13.3341	-16.084	-26.24	-50.02	-60.6	-27.91	-40.51	-2.3	-21.52	-9.47	-13.65	-11.62	-2.71	-13.4023	-14.47	0.49	-26.3185	-20.61	-5.15	-1.96	-18.1607	-17.91	-5.52	-10.4028	-9.42	-6.39	-6.85181	-7.84305	-9.68	-9.68151	-4.8	-17.0109	-16.37	-13.83	4.58	-16.908	-14.6	-2.78	-19.4072	-17.91	-6.93	-13.5061	-12.03	-11.72	-8.97	-10.8081	-11.4666	-13.32	-13.8095
al3n3	-11.7126	-16.9452	-6.66	-10.43	-19.87	-16.54	-20.34	-10.47	-18.11	-15.03	-19.04	-14.23	-8.08	-13.9919	-14.94	-5.95	-18.3883	-17.29	-13	-7.2	-15.5836	-16.31	-11.54	-14.2994	-14.21	-15.06	-15.447	-16.2068	-18.48	-18.4806	-8.38	-14.6947	-15.03	-13.08	-4.59	-15.1505	-15.15	-7.33	-15.7795	-16.06	-11.02	-14.4199	-14.23	-13.46	-14.34	-15.9399	-16.2018	-14.32	-14.8257
al3o3	-6.01418	-10.732	-6.71	-14.88	-23.26	-22.25	-23.5	-6.57	-12.74	-9.99	-10.57	-8.55	-4	-8.61954	-9.55	-2.08	-12.2594	-11.27	-7.5	-2.76	-9.41463	-10.16	-6.57	-8.60036	-8.58	-9.52	-9.7097	-10.3349	-12.58	-12.5803	-3.72	-8.69589	-9.07	-7.26	-1.18	-9.79327	-9.84	-2.72	-9.4226	-9.77	-5.69	-8.25544	-8.14	-7.57	-8.54	-9.64328	-9.91094	-8.35	-8.65394
al3p3	-18.8738	-21.5213	-26.65	-93.96	-32.23	-18.89	-29.14	-11.76	-25.46	-19.52	-24.37	-18.3	-11.57	-21.4795	-22.32	-8.13	-29.7972	-26.55	-15.98	-11.06	-25.41	-25.59	-15.12	-19.6781	-19.02	-19.26	-19.6765	-20.8291	-20.17	-20.1711	-13.06	-23.7712	-23.51	-20.97	-3.79	-21.9999	-20.84	-11.62	-26.132	-25.5	-15.66	-21.4043	-20.5	-19.63	-19.56	-21.4009	-22.1871	-19.86	-20.3148
al3po3	-21.6772	-25.9011			-25.22	-34.13	-19.57	-14.44	-32.57	-20.28	-22.5	-19.25	-12.55	-23.8804	-25.29	-8.78	-37.4549	-31.44	-16.71	-11.9	-29.0873	-29.24	-15.95	-20.7798	-19.82	-18.7	-19.0201	-20.0181	-22.93	-22.9304	-13.97	-26.8268	-26.37	-23.55	-3.73	-26.9809	-24.75	-12.43	-29.9765	-28.77	-16.52	-23.109	-21.66	-21.5	-20.59	-22.2334	-22.9967	-22.58	-22.9645
al3s3	-17.6644	-22.9761	-16.56	-40.13	-36.36	-23.34	-20	-14.98	-23.83	-19.5	-22.46	-16.65	-11.39	-20.0223	-20.9	-8.61	-27.7033	-24.9	-17.06	-10.63	-23.1824	-23.49	-15.48	-19.3489	-18.84	-20.42	-20.6764	-21.7137	-23.63	-23.6303	-12.28	-21.6155	-21.5	-19.16	-5.9	-21.9685	-21.03	-10.97	-23.6524	-23.24	-15.39	-20.306	-19.58	-18.87	-19.97	-21.5857	-22.1997	-20.1	-20.4326
al3se3	-18.5829	-23.8025	-1.93	-23.75	-25.51	-21.5	-15.97	-14.66	-25.85	-18.49	-21.3	-17.33	-11.41	-20.6596	-21.57	-8.51	-29.8369	-26.34	-17.15	-10.63	-24.3226	-24.47	-15.37	-19.5067	-18.84	-19.93	-20.203	-21.2155	-23.6	-23.6004	-12.46	-22.6364	-22.38	-19.92	-5.45	-23.0967	-21.84	-11.04	-24.9453	-24.24	-15.49	-20.8597	-19.91	-19.31	-20.36	-22.0272	-22.6156	-20.42	-20.7812
al3te3	-16.6347	-20.8234	-21.25	-67.38	-18.27	-26.6	-19.05	-12.74	-24.66	-16.46	-17.67	-14.86	-8.92	-18.3531	-19.28	-5.93	-28.6289	-24.85	-14.97	-7.79	-22.0723	-22	-12.37	-16.8184	-16.02	-16.48	-16.7708	-17.8297	-21.13	-21.1304	-9.89	-20.5632	-20.2	-17.67	-2.98	-21.1473	-19.79	-8.22	-22.8929	-21.85	-12.58	-18.4669	-17.31	-16.67	-17.81	-19.4285	-20.1551	-17.98	-18.3732
alasalasalsb	-13.7633	-16.0256	-0.31	-58.38	-21.6	-23.9	-20.79	-7.87	-19.82	-12.83	-15.48	-12.06	-5.93	-14.7732	-15.46	-3.13	-23.5599	-20.34	-10.59	-5.07	-18.2544	-18.06	-8.99	-13.357	-12.61	-11.23	-11.6612	-12.6847	-14.71	-14.7114	-7.17	-17.0785	-16.68	-14.45	-0.2	-16.6435	-15.41	-5.58	-19.1181	-18.1	-9.54	-15.177	-14.12	-13.36	-13.15	-14.9778	-15.5536	-14.44	-14.9475
alasgaasalp	-17.2248	-21.6303	22.18	-33.42	-25.46	-21.09	-29.3	-9.36	-24.4	-16.67	-20.36	-16.65	-8.39	-18.7847	-20.43	-4.98	-28.5248	-25.82	-12.9	-7.86	-23.0876	-24.19	-12.2	-16.8916	-16.36	-14.34	-14.7755	-15.946	-16.3	-16.3012	-10.15	-21.5072	-21.85	-18.55	-0.74	-20.3766	-20.07	-8.53	-23.9602	-24.07	-12.93	-18.9503	-18.17	-17.24	-15.64	-17.5562	-18.3848	-17.76	-18.2325
alasgaasalsb	-12.4959	-16.3143	1.89	-27.13	-15.92	-22.59	-20.19	-6.88	-18.51	-11.43	-13.57	-11.38	-4.21	-13.1302	-14.45	-1.45	-22.2028	-19.97	-9.62	-3.25	-16.5754	-17.22	-7.46	-11.8479	-11.3	-10.01	-10.4515	-11.5314	-13.31	-13.3114	-5.54	-15.5578	-15.75	-12.9	1.16	-15.5153	-15.24	-3.81	-17.4985	-17.25	-8.04	-13.7229	-12.91	-11.94	-11.58	-13.4526	-14.1119	-13.58	-14.1031
albialbialas	-14.3718	-16.947	-18.62	-39.15	-38.75	-21.31	-30.55	-5.78	-21.61	-11.95	-15.36	-12.78	-5.08	-14.9124	-15.81	-2.06	-25.9529	-21.41	-8.58	-4.27	-19.0976	-18.87	-8.03	-12.6682	-11.79	-9.6	-10.0434	-11.0418	-12.88	-12.8815	-6.78	-17.933	-17.41	-14.98	1.5	-17.6543	-15.86	-4.96	-20.1884	-18.9	-9.02	-15.1654	-13.87	-13.36	-11.85	-13.6756	-14.2903	-14.57	-15.0691
aloalsalse	-12.1585	-16.6723	-5.94	-21.97	-24.54	-19.9	-17.54	-10.35	-18.67	-14.01	-15.95	-12.28	-7.43	-14.4435	-15.31	-5.03	-20.768	-18.63	-12.21	-6.29	-16.5563	-16.94	-10.68	-13.881	-13.53	-14.65	-14.8957	-15.7626	-18.02	-18.0204	-7.75	-15.4102	-15.45	-13.28	-3.12	-16.202	-15.61	-6.45	-16.8645	-16.64	-10.28	-14.3695	-13.83	-13.15	-14.44	-15.9125	-16.3392	-14.21	-14.5474
alogaoals	-9.94604	-16.1954	-7.86	-15.43	-19.76	-22.33	-22.04	-10.02	-16.09	-12.94	-14.27	-11.83	-6.26	-11.8514	-13.49	-4.16	-16.6278	-16.35	-10.98	-4.9	-13.0098	-14.58	-9.52	-12.029	-12.08	-12.63	-12.8521	-13.6442	-15.96	-15.9604	-6.4	-12.4692	-13.39	-10.95	-3.21	-13.6742	-14.61	-5.05	-13.2479	-14.27	-8.92	-12.1093	-12.1	-11.33	-12.01	-13.3027	-13.7343	-12.41	-12.7415
alogaoino	-8.18679	-13.4322	-4.74	-11.43	-12.2	-26.83	-24.54	-8.52	-14.06	-11	-10.85	-10.17	-5.07	-9.53144	-11.05	-3.18	-13.5241	-13.3	-9.22	-3.77	-10.2966	-11.74	-7.8	-9.79567	-9.94	-9.83	-10.0426	-10.6933	-13.41	-13.4105	-4.95	-9.86771	-10.75	-8.61	-2.84	-11.4063	-12.25	-3.85	-10.471	-11.44	-7.01	-9.58689	-9.66	-9.07	-8.95	-10.0454	-10.3937	-9.22	-9.57296
alpalpalas	-18.9401	-21.5722	-0.21	-73.84	-31.36	-21.84	-29.59	-11.44	-25.92	-19.1	-23.75	-18.02	-11.16	-21.326	-22.2	-7.69	-30.2525	-26.69	-15.21	-10.7	-25.4993	-25.64	-14.71	-19.3451	-18.64	-17.75	-18.1701	-19.3058	-19.26	-19.2612	-12.72	-23.7577	-23.45	-20.85	-3.2	-22.0979	-20.79	-11.27	-26.2487	-25.53	-15.33	-21.2164	-20.23	-19.43	-18.77	-20.624	-21.3952	-19.51	-19.9666
alpgapalas	-16.3417	-21.0093	-17.48	-44.82	-22.8	-19.71	-26.24	-9.74	-23.04	-16.29	-20.2	-16.21	-8.07	-18.0656	-19.68	-4.79	-27.1279	-24.86	-13.38	-7.42	-22.008	-23.13	-11.92	-16.5093	-16.03	-15.36	-15.7903	-16.9769	-16.96	-16.9612	-9.74	-20.6379	-21.04	-17.83	-0.98	-19.6042	-19.51	-8.06	-22.8493	-23.05	-12.55	-18.3936	-17.7	-16.69	-16.05	-17.9536	-18.7866	-17.65	-18.1252
alpogapoalte	-17.4799	-23.2354			-16.14	-28.64	-20.16	-12.48	-26.39	-16.44	-17.52	-15.88	-8.68	-18.7428	-20.52	-5.57	-30.6993	-27.1	-14.86	-7.52	-22.8632	-23.73	-12.27	-16.8239	-16.15	-16.2	-16.52	-17.5669	-20.79	-20.7904	-9.81	-21.2911	-21.5	-18.19	-2.35	-22.4366	-21.76	-8.01	-23.7642	-23.44	-12.57	-18.7237	-17.69	-17.03	-17.56	-19.2496	-20.0008	-18.69	-19.1086
alpogapoinpo	-23.1948	-28.977			-15.26	-44.98	-19.26	-15.53	-34.26	-21.05	-21.74	-21.82	-11.97	-23.8285	-26.12	-8.39	-39.0106	-33.51	-18.4	-11.04	-29.0875	-30.24	-16.54	-21.5228	-20.7	-20	-20.3625	-21.3847	-23.42	-23.4204	-13.66	-27.1996	-27.39	-24.04	-3.72	-28.4966	-27.13	-11.69	-30.1307	-29.72	-17	-23.8784	-22.59	-22.51	-21.64	-23.3853	-24.2037	-24.66	-25.0727
alsalsalpo	-15.3051	-19.6785			-20.82	-24.57	-20.69	-12.08	-22.56	-16.4	-18.12	-14.43	-8.96	-17.4879	-18.37	-6.17	-25.9694	-22.91	-14.37	-7.88	-20.5723	-20.7	-12.41	-16.3786	-15.77	-16.47	-16.7447	-17.7441	-20.52	-20.5204	-9.69	-19.1709	-18.97	-16.59	-3.57	-19.7114	-18.67	-8.21	-21.1719	-20.49	-12.36	-17.5173	-16.63	-15.96	-16.94	-18.5637	-19.1366	-17.28	-17.6616
alsalsalse	-16.2298	-21.2838	-9.66	-29.41	-27.78	-21.55	-17.11	-13.45	-22.56	-17.48	-20.05	-15.27	-10.04	-18.4181	-19.24	-7.36	-26.1454	-23.39	-15.76	-9.07	-21.3559	-21.55	-13.86	-17.7084	-17.17	-18.54	-18.8025	-19.8151	-22.19	-22.1904	-10.83	-19.9858	-19.83	-17.52	-4.94	-20.5358	-19.6	-9.41	-21.882	-21.36	-13.77	-18.6876	-17.91	-17.2	-18.43	-20.0703	-20.6191	-18.5	-18.8568
alsalsalte	-12.0771	-15.8411	-13.94	-17.55	-19.46	-20.31	-14.89	-9.78	-17.82	-13.25	-14.46	-11.26	-6.61	-13.8601	-14.5	-4.17	-20.6116	-18.44	-12.09	-5.29	-16.063	-16.03	-9.64	-13.2805	-12.76	-13.55	-13.8163	-14.7982	-18.03	-18.0304	-7.06	-15.1554	-14.97	-12.9	-2.59	-15.8141	-15.07	-5.56	-16.6306	-15.97	-9.47	-14.1316	-13.38	-12.56	-13.92	-15.533	-15.9962	-13.66	-14.0686
alsbalsbalbi	-13.3408	-15.5549	-20.44	-82.74	-28.42	-33.47	-26.7	-4.17	-20.8	-10.68	-14.1	-11.23	-3.74	-13.9723	-14.91	-0.58	-25.482	-20.77	-7.01	-2.98	-18.4277	-18.21	-6.64	-11.4624	-10.55	-7.65	-8.09717	-9.1475	-10.88	-10.8815	-5.54	-17.1511	-16.61	-14.09	3.26	-16.6931	-14.85	-3.68	-19.5437	-18.22	-7.74	-14.1336	-12.79	-12.25	-10.16	-11.964	-12.6941	-13.53	-14.0161
alsbgasbalas	-13.4516	-16.9211	-12.26	-78.53	-18.31	-25.03	-20.83	-6.25	-20.29	-11.93	-14.25	-11.96	-4.72	-14.3231	-15.71	-1.72	-24.4548	-21.59	-9.23	-3.87	-18.2748	-18.87	-7.82	-12.4429	-11.81	-9.76	-10.2021	-11.316	-12.78	-12.7815	-6.18	-16.9962	-17.11	-14.12	1.55	-16.7292	-16.16	-4.46	-19.2465	-18.85	-8.55	-14.5943	-13.66	-12.76	-11.52	-13.3689	-14.134	-14.06	-14.5659
alsealsealpo	-17.58	-22.2336			-22.5	-24.55	-19.35	-13.23	-25.68	-17.53	-19.43	-16.27	-10.19	-19.5762	-20.54	-7.21	-29.5612	-25.69	-15.69	-9.24	-23.3154	-23.38	-13.81	-18.058	-17.32	-17.85	-18.1372	-19.1307	-21.98	-21.9804	-11.18	-21.6724	-21.35	-18.83	-4.05	-22.2437	-20.85	-9.65	-24.0206	-23.13	-13.96	-19.5608	-18.49	-17.94	-18.76	-20.4243	-21.0151	-19.24	-19.6259
alsealseals	-17.3946	-22.5205	-5.58	-26.95	-26.15	-21.5	-16.61	-14.04	-24.2	-17.99	-20.65	-16.3	-10.72	-19.5296	-20.4	-7.93	-27.9662	-24.85	-16.46	-9.84	-22.8221	-23	-14.62	-18.6132	-18.01	-19.26	-19.5271	-20.5412	-22.9	-22.9004	-11.64	-21.3007	-21.09	-18.7	-5.2	-21.8043	-20.72	-10.21	-23.392	-22.78	-14.62	-19.7633	-18.9	-18.25	-19.41	-21.0634	-21.6339	-19.46	-19.8188
alsealsealte	-14.0534	-18.1963	-8.85	-31.33	-16.76	-20.29	-14.14	-10.98	-20.54	-14.34	-15.55	-12.89	-7.59	-15.6508	-16.37	-5.01	-23.7782	-20.98	-13.48	-6.33	-18.4211	-18.34	-10.87	-14.7995	-14.16	-15.07	-15.3483	-16.332	-19.66	-19.6604	-8.26	-17.3104	-17.03	-14.77	-3.03	-18.0929	-17.09	-6.66	-19.0825	-18.24	-10.84	-15.9465	-15.02	-14.29	-15.79	-17.4494	-17.9384	-15.52	-15.9322
alsegaseals	-17.2761	-23.8697	-3.86	-16.61	-24.51	-20.96	-17.92	-14.03	-24.05	-17.66	-19.9	-16.58	-10.01	-18.8871	-20.49	-7.25	-27.5853	-25.57	-16.32	-8.99	-22.089	-23.24	-14.16	-18.157	-17.76	-18.7	-18.9772	-20.0433	-22.41	-22.4104	-11.03	-20.7803	-21.25	-18.23	-4.75	-21.5991	-21.61	-9.42	-22.7204	-23	-14.19	-19.3571	-18.76	-17.93	-18.77	-20.4661	-21.12	-19.28	-19.6518
alsegasealte	-13.9364	-19.3447	-6.08	-2.15	-14.09	-20.47	-16.04	-10.97	-20.19	-13.97	-14.84	-13.08	-6.96	-15.0817	-16.45	-4.41	-23.4529	-21.66	-13.36	-5.55	-17.7463	-18.53	-10.44	-14.373	-13.92	-14.57	-14.8588	-15.8915	-19.17	-19.1704	-7.69	-16.8224	-17.15	-14.32	-2.66	-17.9437	-17.92	-5.93	-18.4595	-18.42	-10.42	-15.5487	-14.87	-13.97	-15.25	-16.9435	-17.5159	-15.38	-15.8071
alsegaseinse	-19.5914	-26.5387	-4.33	-14.22	-14.63	-27.05	-19.79	-16.09	-27.04	-19.42	-20.33	-19.2	-10.81	-20.2364	-21.94	-8.04	-30.4296	-27.63	-18.51	-9.56	-23.6033	-24.69	-15.67	-19.8638	-19.37	-20.41	-20.7229	-21.7554	-24.05	-24.0504	-12.07	-22.5516	-22.92	-20	-5.67	-24.0745	-23.72	-10.11	-24.406	-24.48	-15.72	-21.2397	-20.48	-19.92	-20.6	-22.3707	-22.9785	-21.63	-22.0331
alsgasalo	-12.6208	-18.6519	-11.44	-20.16	-24.56	-20.15	-19.6	-11.64	-19.03	-14.89	-16.97	-13.09	-7.7	-14.6581	-16.21	-5.35	-20.8478	-19.9	-12.91	-6.52	-16.6489	-17.99	-11.25	-14.3862	-14.28	-15.07	-15.3165	-16.2468	-18.61	-18.6104	-8.08	-15.6373	-16.35	-13.63	-3.68	-16.6584	-17.17	-6.72	-16.9685	-17.67	-10.8	-14.7922	-14.57	-13.71	-14.75	-16.2553	-16.768	-14.68	-15.0197
alsgasalse	-16.3023	-22.8137	-8.51	-17.45	-20.53	-20.99	-18.85	-13.9	-22.49	-17.33	-19.38	-15.74	-9.43	-17.8477	-19.42	-6.8	-25.819	-24.19	-15.87	-8.26	-20.6183	-21.81	-13.6	-17.4445	-17.12	-18.12	-18.3913	-19.4577	-21.86	-21.8604	-10.34	-19.5559	-20.09	-17.2	-4.67	-20.4554	-20.65	-8.67	-21.2166	-21.61	-13.52	-18.4501	-17.95	-17.08	-18.05	-19.7278	-20.3635	-18.59	-18.9605
alsgasins	-16.8294	-23.5876	-11.52	-16.16	-21.28	-28.74	-19.57	-15.36	-23.02	-17.87	-19.52	-16.84	-9.57	-17.7283	-19.29	-7.04	-25.7296	-23.97	-16.84	-8.13	-20.1239	-21.28	-14.08	-17.8345	-17.53	-18.56	-18.8506	-19.8935	-22.5	-22.5004	-10.46	-19.4448	-19.96	-17.24	-5.52	-20.9693	-21.06	-8.58	-20.7753	-21.12	-13.87	-18.7055	-18.22	-17.48	-18.09	-19.8097	-20.3706	-19.12	-19.5176
altealtealpo	-17.202	-21.4953			-17.12	-27.93	-21.07	-12.83	-25.72	-16.73	-18.08	-15.3	-9.21	-18.9171	-19.93	-6.14	-29.877	-25.7	-15.07	-8.12	-22.8653	-22.82	-12.63	-17.1277	-16.3	-16.6	-16.8995	-17.9292	-21.29	-21.2904	-10.23	-21.2532	-20.87	-18.26	-2.94	-21.9236	-20.42	-8.56	-23.7053	-22.61	-12.89	-18.8954	-17.67	-17.12	-18.06	-19.6952	-20.3941	-18.47	-18.8692
altealteals	-14.2617	-18.1933	-17.71	-50.92	-18.88	-23.14	-16.99	-11.21	-21.2	-14.84	-15.94	-13.08	-7.72	-16.0309	-16.81	-5.02	-24.4729	-21.55	-13.53	-6.48	-18.954	-18.91	-10.97	-15.0119	-14.36	-15.07	-15.347	-16.3716	-19.62	-19.6204	-8.41	-17.755	-17.48	-15.2	-2.78	-18.3857	-17.35	-6.82	-19.6376	-18.79	-10.98	-16.2442	-15.3	-14.56	-15.88	-17.4993	-18.094	-15.77	-16.1691
altealtealse	-15.2927	-19.4475	-15.2	-50.25	-17.33	-23.33	-16.43	-11.84	-22.58	-15.42	-16.56	-13.89	-8.23	-16.9662	-17.78	-5.45	-26.1417	-22.87	-14.22	-7.02	-20.1887	-20.11	-11.6	-15.7879	-15.07	-15.79	-16.0747	-17.096	-20.41	-20.4104	-9.04	-18.888	-18.56	-16.18	-3	-19.5826	-18.4	-7.4	-20.9296	-19.99	-11.69	-17.1831	-16.14	-15.45	-16.82	-18.459	-19.0667	-16.72	-17.1223
altegatealpo	-16.8624	-22.5027			-10.24	-26.81	-19.4	-12.43	-25.18	-16.08	-17.04	-15.31	-8.29	-18.0717	-19.76	-5.28	-29.333	-26.17	-14.8	-7.07	-21.9423	-22.78	-11.96	-16.4679	-15.83	-16.03	-16.3395	-17.4195	-20.57	-20.5704	-9.38	-20.5028	-20.74	-17.52	-2.35	-21.5835	-21.08	-7.55	-22.826	-22.55	-12.21	-18.2474	-17.27	-16.54	-17.39	-19.0618	-19.8445	-18.17	-18.5824
altegatealse	-15.1629	-20.6275	-14	-28.38	-12.78	-22.45	-17.03	-11.55	-22.37	-15.09	-15.87	-14.18	-7.68	-16.5098	-17.95	-4.91	-25.9532	-23.64	-14.03	-6.41	-19.7376	-20.49	-11.18	-15.3826	-14.86	-15.33	-15.6244	-16.6977	-19.92	-19.9204	-8.56	-18.5257	-18.79	-15.77	-2.65	-19.5145	-19.26	-6.83	-20.5208	-20.35	-11.29	-16.8213	-16.03	-15.13	-16.15	-17.83	-18.52	-16.51	-16.9254
altegateinte	-18.225	-24.2993	-18.47	-5.06	-12.87	-38.47	-21.07	-13.84	-26.46	-17.32	-17.35	-17.39	-8.9	-18.8969	-20.63	-5.93	-30.5858	-27.27	-16.51	-7.53	-22.7231	-23.58	-13.14	-17.7502	-17.1	-17.64	-17.9694	-19.0646	-21.9	-21.9004	-10.1	-21.476	-21.71	-18.51	-3.28	-23.0119	-22.43	-8.07	-23.6778	-23.38	-13.33	-19.5108	-18.51	-17.86	-18.6	-20.3145	-21.1129	-19.71	-20.1326
b3as3	-1.19854	-3.01024	9.91	-13.02	-8.13	-5.13	-11.11	2.41	-5.46	-0.38	-1.05	-0.83	5.98	-1.86794	-2.9	8.25	-8.35852	-7.08	0.3	7.21	-4.09216	-4.77	3.17	-0.65332	-0.29	0.18	-0.24151	-1.24512	-1.95	-1.9508	5.66	-2.82879	-3.08	-0.67	10.22	-3.57308	-3.63	7.01	-4.47123	-4.55	3.46	-1.27731	-0.77	0.12	-0.42	-2.28837	-2.7784	-0.81	-1.32808
b3bi3	-2.24447	-2.90902	-11.87	-23.9	0.5	-3.12	-7.97	3.16	-8.17	1.2	1.29	-0.17	6.34	-2.51167	-3.94	8.87	-12.5444	-9.33	0.78	7.59	-5.64084	-6.29	4.03	-0.09101	0.42	0.3	-0.15445	-1.12251	-1.17	-1.17136	6.26	-3.73978	-3.86	-1.11	11.87	-5.37975	-4.64	7.49	-6.05957	-5.73	4.51	-0.91944	-0.1	0.49	-0.32	-2.0314	-2.69977	-0.21	-0.72553
b3p3	-2.09879	-2.72652	-11.24	-37.59	-4.06	-4.68	-7.88	0.48	-4.23	-1.67	-2.5	-2.44	4.06	-2.64188	-3.31	6.21	-7.00522	-6.42	-1.66	5.36	-4.0736	-4.49	1.39	-2.11549	-1.81	-1.91	-2.33047	-3.30777	-4.05	-4.05067	3.81	-3.35447	-3.53	-1.69	7.53	-3.4819	-3.63	5.17	-4.43124	-4.45	1.7	-2.5102	-2.12	-1.17	-2.07	-3.92896	-4.31373	-2.1	-2.62528
b3po3	-6.09867	-11.6935			-3.75	-8.04	-7.99	-0.3	-12.51	-2.91	-4.34	-5.37	3.83	-5.57165	-7.3	6.36	-16.5545	-13.16	-3.22	5.01	-9.05811	-10.09	0.1	-3.9612	-3.46	-3.42	-3.73452	-4.70008	-6.89	-6.89028	2.68	-7.8482	-8.15	-5.24	8.58	-10.1327	-9.54	4.51	-9.80542	-9.77	-0.12	-5.53322	-4.73	-4.35	-4.54	-6.06544	-6.81826	-6.34	-6.73179
b3s3	-5.15048	-7.49964	-5.15	-9.18	-4.42	-4.08	-6	-3.28	-6.48	-5.2	-5.36	-5.61	0.27	-5.1441	-5.75	2.36	-8.24354	-7.97	-5.04	1.54	-6.08274	-6.5	-2.42	-5.2404	-5.05	-4.5	-4.78918	-5.62226	-8.37	-8.37018	-0.15	-5.92777	-6.15	-4.7	2.37	-6.46038	-6.71	1.27	-6.49106	-6.6	-2.28	-5.66529	-5.41	-4.72	-4.7	-6.29464	-6.53078	-5.04	-5.43703
b3sb3	-2.41019	-2.88603	-16.51	-45.26	-1.43	-7.12	-7.42	2.05	-7.23	-0.25	-0.28	-0.45	5.07	-3.19877	-4.2	7.49	-11.4052	-9.06	-0.35	6.31	-5.93637	-6.27	2.75	-1.32239	-0.81	-0.65	-1.0762	-2.10472	-2.6	-2.60123	4.92	-4.31115	-4.31	-1.88	10	-5.22712	-4.69	6.18	-6.37544	-5.94	3.09	-2.12896	-1.37	-0.58	-1.39	-3.08587	-3.77955	-1.17	-1.68104
b3se3	-5.82869	-9.43937	14.13	-5.61	-4.35	-3.93	-6.9	-2.67	-8.36	-4.85	-5.65	-5.88	1.24	-5.55651	-6.51	3.42	-10.9631	-10.07	-5.09	2.59	-7.24723	-7.91	-2	-5.2744	-4.99	-4.77	-5.06687	-5.96017	-8.81	-8.8102	0.58	-6.77037	-7.07	-5.02	4.01	-7.90045	-8.09	2.23	-7.76821	-7.93	-1.96	-6.03106	-5.64	-4.94	-5.48	-7.0764	-7.49837	-5.74	-6.134
b3te3	-6.16535	-9.75328	-5.14	-16.16	-4.79	-5.28	-8.55	-2.78	-10.01	-4.57	-5.23	-5.71	1.42	-6.10954	-7.05	3.7	-13.4992	-11.65	-5.13	2.72	-8.50433	-8.86	-1.59	-5.27906	-4.82	-4.63	-4.92716	-5.89239	-8.83	-8.83028	0.75	-7.66613	-7.74	-5.45	4.71	-9.07785	-8.76	2.37	-9.15437	-8.83	-1.61	-6.35665	-5.68	-4.98	-5.72	-7.24946	-7.8569	-5.9	-6.29774
basalasbp	-4.31367	-6.41967	2.61	-18.63	-13.3	-16.46	-15.2	-0.17	-8.43	-3.48	-5.01	-3.67	3.09	-5.10033	-5.98	5.54	-11.9142	-10.23	-2.74	4.28	-7.56652	-7.99	0.1	-3.90027	-3.43	-3.2	-3.61135	-4.64952	-5.52	-5.52091	2.44	-6.44651	-6.51	-4.15	7.78	-6.67005	-6.42	3.96	-8.09041	-7.89	0.11	-4.86783	-4.22	-3.32	-4.17	-6.01475	-6.56948	-4.46	-4.95745
basalasgaas	-8.77353	-13.4619	8.79	-11.81	-15.13	-17.23	-18.71	-2.89	-14.59	-7.62	-9.74	-8.36	-0.01	-9.37632	-11.01	2.76	-18.2689	-16.48	-5.64	0.84	-12.9001	-14.09	-3.59	-7.96898	-7.54	-5.69	-6.10981	-7.23597	-8.53	-8.53113	-1.37	-11.6469	-12.15	-8.97	5.63	-11.7288	-11.92	0.28	-13.6969	-14.01	-4.06	-9.64788	-9.02	-8.03	-7.35	-9.2704	-9.97269	-9.29	-9.78234
basbasbbi	-3.2269	-4.37148	1.33	-13.15	-5.23	-5.45	-9.74	-0.23	-7.01	-1.89	-1.9	-2.35	3.32	-3.73189	-4.68	5.45	-10.1859	-8.82	-2.02	4.59	-5.76762	-6.22	1.06	-2.55009	-2.18	-1.98	-2.408	-3.3441	-4.63	-4.63108	3.23	-4.60799	-4.78	-2.56	7.06	-5.53295	-5.45	4.46	-6.17615	-6.03	1.4	-3.1577	-2.61	-1.75	-2.61	-4.37494	-4.81749	-2.31	-2.85359
basbasbn	-2.94386	-4.38198	6.11	-9.21	-9.16	-6.31	-11.7	-1.12	-5.58	-3.01	-3	-3.1	2.53	-3.46528	-4.25	4.57	-7.49745	-7.02	-2.5	3.77	-4.70857	-5.29	0.01	-3.07067	-2.85	-2.19	-2.61444	-3.42107	-4.98	-4.98061	2.31	-4.12319	-4.41	-2.75	5.58	-4.4688	-4.75	3.59	-5.03669	-5.22	0.28	-3.45014	-3.15	-2.41	-2.89	-4.65822	-4.88282	-2.96	-3.48769
basbasbp	-1.51948	-2.96177	7.8	-25.46	-6.13	-5.58	-10.53	1.69	-5.08	-0.86	-1.64	-1.42	5.28	-2.19122	-3.1	7.51	-7.96012	-6.94	-0.42	6.55	-4.13997	-4.73	2.53	-1.19205	-0.85	-0.61	-1.03048	-2.02808	-2.74	-2.74076	4.99	-3.06188	-3.29	-1.05	9.27	-3.58571	-3.69	6.35	-4.5165	-4.58	2.82	-1.74636	-1.28	-0.35	-1.06	-2.92254	-3.38433	-1.29	-1.81019
basbasbsb	-3.10206	-4.03393	2.44	-23.89	-4.39	-7.28	-9.82	-0.27	-6.57	-2.09	-2.16	-2.24	3.19	-3.70223	-4.52	5.31	-9.60895	-8.45	-2.11	4.45	-5.60966	-5.97	0.92	-2.67882	-2.31	-2.03	-2.45029	-3.40471	-4.76	-4.76103	3.06	-4.55955	-4.69	-2.6	6.81	-5.23153	-5.17	4.31	-6.02082	-5.84	1.21	-3.28493	-2.75	-1.85	-2.69	-4.45759	-4.90194	-2.44	-2.98176
bbialbibsb	-3.65827	-5.51058	-14.5	-38.48	-5.56	-19.21	-12.35	2.99	-9.91	-0.46	-1.5	-1.7	5.08	-4.17982	-5.4	7.72	-14.5658	-11.01	0.34	6.23	-7.65845	-7.99	2.62	-1.74683	-1.09	-0.1	-0.51545	-1.5501	-2.43	-2.43142	4.54	-5.92549	-5.82	-3.16	10.92	-6.98229	-5.95	5.97	-8.27412	-7.61	2.62	-3.12856	-2.14	-1.53	-1.49	-3.23248	-3.92627	-2.33	-2.82396
bbibbibas	-2.85959	-3.83667	-3.84	-17.73	-2.91	-4.89	-8.78	1.2	-7.75	-0.59	-0.56	-1.42	4.62	-3.34291	-4.52	6.94	-11.5653	-9.33	-0.87	5.9	-5.92095	-6.47	2.33	-1.54595	-1.11	-1.05	-1.48613	-2.44486	-3.2	-3.20122	4.55	-4.37798	-4.53	-2.01	9.24	-5.65612	-5.28	5.79	-6.33218	-6.09	2.75	-2.25475	-1.57	-0.82	-1.71	-3.44097	-4.00836	-1.48	-2.00777
bbibbibp	-3.0801	-3.6844	-8.66	-24.11	-2.21	-4.15	-7.8	0.68	-7.3	-1.01	-1.02	-1.85	4.04	-3.58176	-4.65	6.32	-11.1042	-9.17	-1.43	5.35	-5.91859	-6.4	1.8	-1.98718	-1.57	-1.48	-1.90849	-2.86966	-3.78	-3.78117	4.03	-4.49374	-4.64	-2.28	8.46	-5.56053	-5.26	5.26	-6.30629	-6.07	2.26	-2.59004	-1.95	-1.17	-2.1	-3.81285	-4.37083	-1.8	-2.32658
bbibbibsb	-2.39142	-3.05584	-11.42	-30.87	0.13	-7.28	-7.63	2.6	-7.94	0.56	0.63	-0.37	5.76	-2.87118	-4.16	8.24	-12.2675	-9.39	0.24	7.01	-5.86222	-6.41	3.45	-0.64723	-0.14	-0.16	-0.60427	-1.59288	-1.84	-1.84132	5.66	-4.05657	-4.15	-1.48	11.05	-5.45974	-4.81	6.9	-6.28937	-5.94	3.89	-1.45988	-0.67	0.01	-0.82	-2.5245	-3.20108	-0.65	-1.16452
bnbpbas	-3.04025	-4.14674	1.77	-19.53	-6.73	-5.73	-9.78	-1.6	-5.05	-3.2	-3.31	-3.39	2.08	-3.56205	-4.24	4.09	-6.96009	-6.65	-2.92	3.33	-4.57479	-5.07	-0.37	-3.34489	-3.14	-2.69	-3.11874	-3.90873	-5.42	-5.42057	1.9	-4.12596	-4.38	-2.9	4.91	-4.30928	-4.59	3.16	-4.88657	-5.04	-0.08	-3.64064	-3.37	-2.63	-3.18	-4.95237	-5.13003	-3.17	-3.70326
boalobs	-8.35869	-11.0224	-7.96	-10.44	-14.84	-18.89	-15	-7.98	-10.91	-9.89	-10.73	-9.16	-5.63	-9.40495	-10	-3.82	-11.3818	-11.13	-8.84	-4.65	-9.96162	-10.42	-7.55	-9.46717	-9.42	-9.18	-9.41006	-9.99527	-12.02	-12.0202	-5.73	-9.76314	-10.04	-8.86	-3.73	-10.0727	-10.29	-4.78	-10.1723	-10.39	-7.23	-9.54484	-9.45	-8.93	-8.96	-10.2438	-10.2763	-8.76	-9.12198
boalsgase	-8.4202	-12.952	-1.05	-8.29	-9.13	-13.98	-13.64	-6.92	-12.8	-9.26	-10.12	-8.64	-3.6	-9.679	-11.08	-1.41	-14.6732	-14.39	-8.46	-2.32	-11.1651	-12.41	-6.48	-9.36658	-9.29	-9.27	-9.5331	-10.382	-12.93	-12.9303	-3.87	-10.4945	-11.22	-8.84	-0.41	-11.3812	-12.14	-2.51	-11.5063	-12.23	-6.12	-9.75601	-9.6	-8.78	-9.47	-10.9808	-11.3582	-9.31	-9.66691
bpalpbas	-5.81441	-7.94376	5.08	-36.88	-10.77	-13.23	-15.55	-1.51	-9.36	-5.04	-6.99	-5.84	1.44	-6.32958	-7.13	3.83	-12.4416	-11.02	-4.28	2.47	-8.68886	-9.07	-1.69	-5.56808	-5.14	-4.73	-5.13399	-6.17616	-7.32	-7.32089	0.57	-7.83821	-7.91	-5.78	5.76	-7.725	-7.52	2.07	-9.28973	-9.11	-1.84	-6.62245	-6.04	-5.13	-5.65	-7.48578	-8.01687	-6.26	-6.75958
bpalpgap	-8.72163	-12.5657	-16.37	-49.7	-14.3	-14.32	-19.27	-4.17	-12.93	-8.48	-10.68	-9	-1.38	-9.62997	-11.03	1.25	-16.3684	-15.54	-7.66	-0.3	-12.2166	-13.33	-4.78	-8.84274	-8.55	-8.98	-9.39828	-10.5352	-10.99	-10.991	-2.42	-11.3833	-11.94	-9.17	3.45	-11.1393	-11.66	-0.77	-12.8999	-13.34	-5.01	-10.0646	-9.64	-8.5	-9.35	-11.2288	-11.9129	-9.98	-10.4774
bpbpbas	-1.82442	-2.87235	0.79	-34.26	-4.77	-5.45	-9.4	1.03	-4.66	-1.29	-2.12	-1.95	4.64	-2.44894	-3.24	6.83	-7.50836	-6.72	-1.08	5.93	-4.13683	-4.64	1.93	-1.68595	-1.36	-1.3	-1.72047	-2.70903	-3.43	-3.43071	4.38	-3.23014	-3.43	-1.4	8.36	-3.56804	-3.71	5.74	-4.49952	-4.54	2.23	-2.16045	-1.73	-0.79	-1.61	-3.46932	-3.89615	-1.72	-2.24263
bpbpbbi	-3.38826	-3.94867	-7.26	-27.9	-3.41	-4.61	-7.24	-0.97	-5.98	-2.34	-2.43	-2.93	2.53	-3.84265	-4.59	4.58	-9.0047	-8.09	-2.69	3.81	-5.43788	-5.77	0.36	-3.05093	-2.73	-2.43	-2.85692	-3.77823	-5.26	-5.26098	2.49	-4.54784	-4.69	-2.81	5.85	-5.10091	-5.1	3.7	-5.81068	-5.66	0.72	-3.50851	-3.04	-2.15	-2.97	-4.70694	-5.10888	-2.61	-3.15566
bpbpbn	-3.12079	-3.84391	-7.85	-25.31	-4.92	-4.55	-7.54	-1.98	-4.52	-3.32	-3.53	-3.61	1.7	-3.58254	-4.14	3.68	-6.36073	-6.19	-3.24	2.95	-4.36854	-4.77	-0.68	-3.5443	-3.35	-3.06	-3.49069	-4.26372	-5.74	-5.74053	1.54	-4.07363	-4.29	-3	4.31	-4.09102	-4.36	2.79	-4.66293	-4.78	-0.39	-3.77642	-3.53	-2.79	-3.38	-5.15967	-5.28233	-3.28	-3.81876
bpbpbsb	-3.26642	-3.53524	-6.54	-36.66	-3.54	-7.78	-7.78	-0.98	-5.53	-2.48	-2.66	-2.8	2.44	-3.75338	-4.37	4.47	-8.37419	-7.62	-2.74	3.7	-5.2118	-5.44	0.26	-3.13135	-2.8	-2.49	-2.90595	-3.84613	-5.34	-5.34094	2.36	-4.43987	-4.53	-2.82	5.63	-4.75532	-4.75	3.57	-5.59606	-5.4	0.57	-3.58514	-3.13	-2.23	-3.03	-4.7722	-5.16728	-2.7	-3.24465
bpoalpobte	-9.70212	-14.2135			-9.33	-20.04	-13.09	-5.28	-15.42	-7.47	-8.8	-8.53	-1.08	-9.76839	-11.01	1.47	-19.517	-16.5	-7.81	0.21	-12.9149	-13.37	-4.35	-8.38622	-7.79	-7.83	-8.13692	-9.09922	-12.39	-12.3903	-2	-11.8293	-11.85	-9.19	3.32	-13.4812	-12.77	-0.23	-13.6985	-13.22	-4.53	-9.87944	-8.98	-8.39	-9.38	-10.9645	-11.5939	-9.73	-10.1217
[truncated: 845 more rows]
[truncated: 24 more columns]

## Sheet: covalent_dE_DFT_awcvtz
Dimerization energies in kcal mol-1 for the covalent IHD302 set. All computations were done with the awcvtz basis set. Statistics can be found at the bottom of the table.
Program Versions:	ORCA 5.0.4	Q-Chem 5.4	MOLPRO 2023.2
[truncated: 917 more rows]

## Sheet: PBE0-D4 RI comparison
Comparison between different basis sets and RI approximations for the covalent dimerization energies. Statistics can be found at the bottom of the table. All computations were conducted with PBE0-D4 in ORCA 5.0.4 with the exception of AVQZ-PP-KS which was computed in MOLPRO 2024.1.
[truncated: 919 more rows]

[truncated: 3 more sheets: IHD201_Subset_dimerization_ener, Relativity, r_ND]
